# Supplementary material for: Interplay between coding and exonic splicing regulatory sequences
Source: HighWire-hosted journal article supplement (doi:10.1101/gr.241315.118), 2019-04-08
Supplement: Supplemental_Table_S1.xlsx [file Supplemental_Table_S1.xlsx]

## Sheet: Description
Supplementary Table S1:	GEO identifiers of publicly available RNA-seq datasets and lists of splicing factor-regulated exons.
GEO Number	GEO accession numbers of RNA-seq and CLIP experiments
SRSF1	Exons regulated by SRSF1
SRSF2	Exons regulated by SRSF2
SRSF3	Exons regulated by SRSF3
TRA2A_and_TRA2B	Exons regulated by TRA2A_and_TRA2B
HNRNPH1	Exons regulated by HNRNPH1
HNRNPK	Exons regulated by HNRNPK
HNRNPL	Exons regulated by HNRNPL
PTBP1	Exons regulated by PTBP1

## Sheet: GEO Number
RNA-seq	GSE	ID	Cell line	Experiment
SRSF1	(GSE80848)	ENCSR066VOO	K562	SRSF1 knock-down by shRNA
SRSF1	(GSE80855)	ENCSR094KBY	HepG2	SRSF1 knock-down by shRNA
SRSF1	(GSE52834)		GM19238	SRSF1 knock-down by siRNA
SRSF1	(GSE26463)		HeLA	SRSF1 knock-down by siRNA
SRSF2	(GSE65349)		K562	SRSF2 over-expression
SRSF2	(GSE78705)		Huh7	SRSF2 knock-down by siRNA
SRSF3	(GSE52834)		GM19238	SRSF3 knock-down by siRNA
SRSF3	(GSE88229)	ENCSR376FGR	HepG2	SRSF3 knock-down by shRNA
TRA2A_and_TRA2B	(GSE59335)		MDA-MB-231	TRA2A+TRA2B knock-down by siRNA
HNRNPH1	(GSE34996)		293T	HNRNPH1 knock-down by siRNA
HNRNPK	(GSE52834)		GM19238	HNRNPK knock-down by siRNA
HNRNPK	(GSE80896)	ENCSR529JNJ	K562	HNRNPK knock-down by shRNA
HNRNPK	(ENCSR853ZJS)		HepG2	HNRNPK knock-down by shRNA
HNRNPL	(GSE88364)	ENCSR563YIS	K562	HNRNPL knock-down by shRNA
HNRNPL	(ENCSR155BMF)		HepG2	HNRNPL knock-down by shRNA
HNRNPL	(GSE72842)		LNCaP	HNRNPL knock-down by siRNA
HNRNPL	(GSE52834)		GM19238	HNRNPL knock-down by siRNA
PTBP1	(GSE80847)	ENCSR064DXG	HepG2	PTBP1 knock-down by shRNA
PTBP1	(GSE59884)		293T	PTBP1 knock-down by siRNA
PTBP1	(GSE42701)		HeLA	PTBP1 knock-down by shRNA
PTBP1	(GSE88134)	ENCSR239BCO	K562	PTBP1 knock-down by shRNA
CLIP-seq	Database	GSE	ID	Cell line
HNRNPK	ENCODE	GSE92089	ENCFF556EBT	HepG2
HNRNPK	ENCODE	GSE92089	ENCFF877KBJ	HepG2
HNRNPK	ENCODE	GSE92089	ENCFF993NVI	HepG2
HNRNPK	ENCODE	GSE91621	ENCFF079MYZ	K562
HNRNPK	ENCODE	GSE91621	ENCFF448SCQ	K562
HNRNPK	ENCODE	GSE91621	ENCFF769QNG	K562
HNRNPL	ENCODE	ENCSR724RDN	ENCFF415HDB	HepG2
HNRNPL	ENCODE	ENCSR724RDN	ENCFF890KEE	HepG2
HNRNPL	ENCODE	ENCSR795CAI	ENCFF296JHG	K562
PTBP1	ENCODE	GSE91714	ENCFF154BAE	HepG2
PTBP1	ENCODE	GSE91714	ENCFF170SCU	HepG2
PTBP1	ENCODE	GSE91714	ENCFF471GJE	HepG2
PTBP1	ENCODE	GSE92205	ENCFF200AWX	K562
PTBP1	ENCODE	GSE92205	ENCFF262NXW	K562
PTBP1	ENCODE	GSE92205	ENCFF924CZR	K562
SRSF1	ENCODE	GSE92215	ENCFF179SCM	HepG2
SRSF1	ENCODE	GSE92215	ENCFF184TBM	HepG2
SRSF1	ENCODE	GSE92215	ENCFF530MIN	HepG2
SRSF1	ENCODE	GSE91757	ENCFF287KWV	K562
SRSF1	ENCODE	GSE91757	ENCFF609IXO	K562
SRSF1	ENCODE	GSE91757	ENCFF788UFQ	K562
TRA2A	ENCODE	GSE91657	ENCFF210QRC	HepG2
TRA2A	ENCODE	GSE91657	ENCFF955HGE	HepG2
TRA2A	ENCODE	GSE91702	ENCFF004IIT	K562
TRA2A	ENCODE	GSE91702	ENCFF257VRQ	K562
TRA2A	ENCODE	GSE91702	ENCFF744EQP	K562
HNRNPL	GEO	GSE47604	GSM1153097	CD4
HNRNPL	GEO	GSE47604	GSM1153098	CD4
HNRNPL	GEO	GSE47604	GSM1153095	JSL1
HNRNPL	GEO	GSE47604	GSM1153096	JSL1
SRSF1	GEO	GSE71096	GSM1826787	Hela
SRSF3	GEO	GSE71096	GSM1826788	Hela
SRSF3	GEO	GSE71096	GSM1826793	Hela
PTBP1	POSTAR2	GSE19323	GSM480476	Hela
PTBP1	POSTAR2	GSE19323	GSM480477	Hela
PTBP1	POSTAR2	GSE19323	GSM480478	Hela
PTBP1	POSTAR2	GSE19323	GSM480479	Hela
PTBP1	POSTAR2	GSE42701	GSM1048186	Hela
PTBP1	POSTAR2	GSE57278	GSM1378377	HEK293
PTBP1	POSTAR2	GSE57278	GSM1486177	HEK293
PTBP1	POSTAR2	GSE57278	GSM1486178	HEK293
SRSF1	POSTAR2	GSE83923	GSM2221663	HEK293
SRSF1	POSTAR2	GSE83923	GSM2221664	HEK293
SRSF1	POSTAR2	GSE83923	GSM2221665	HEK293
SRSF1	POSTAR2	GSE83923	GSM2221666	HEK293
SRSF1	POSTAR2	GSE83923	GSM2221667	HEK293
SRSF1	POSTAR2	GSE83923	GSM2221668	HEK293
HNRNPK	POSTAR2			HepG2
HNRNPK	POSTAR2			K562
PTBP1	POSTAR2			HepG2
PTBP1	POSTAR2			K562
SRSF1	POSTAR2			HepG2
SRSF1	POSTAR2			K562
TRA2A	POSTAR2			HepG2
TRA2A	POSTAR2			K562
HNRNPL	dorina			CD4
HNRNPL	dorina			Jurkat
SFRS1	dorina			HEK293

## Sheet: SRSF1
	gene_symbol	exon_skipped	coordonnees	exons_flanquants	psi_K562_SRSF1	psi_K562_SRSF1	psi_K562_HNRNPK	psi_K562_HNRNPK				deltaPSI	valeur abs deltaPSI	pvalue_glm	pvalue_corrigee_glm			negative deltaPsi= activated exons
SRSF1_K562	PKD1	35	16:2147320-2147504	34:36	0.205882	0.217391	1	1				-0.788363	0.788363	0	0			positive deltaPsi= repressed exons
SRSF1_K562	RCCD1	3	15:91499030-91499113	2:4	0.0697674	0.0285714	0.769231	0.85				-0.760446	0.760446	0	0
SRSF1_K562	IP6K2	11	3:48731892-48731958	10:12	0.785714	0.846154	0.125	0				0.753434	0.753434	4.83176e-11	2.71327e-09
SRSF1_K562	ACADM	3	1:76194074-76194173	1:4	0.0948905	0.118056	0.786111	0.852941				-0.713053	0.713053	0	0
SRSF1_K562	ATP2C1	20	3:130698093-130698263	19:21	0.188679	0.298701	0.944444	0.933333				-0.695199	0.695199	0	0
SRSF1_K562	IRF3	2	19:50167700-50168103	1:3	0.272727	0.186047	0.875	0.954545				-0.685386	0.685386	1.11022e-16	1.17881e-14
SRSF1_K562	RPRD2	6	1:150414357-150414434	5:7	0.870968	0.870968	0.2	0.171429				0.685253	0.685253	0	0
SRSF1_K562	UGGT2	12	13:96637158-96637591	11:13	0.84375	1	0.32	0.2				0.661875	0.661875	6.6333e-10	3.23352e-08
SRSF1_K562	XIAP	3	X:123019481-123020389	2:4	0.405405	0.222222	0.964286	0.976744				-0.656701	0.656701	0	0
SRSF1_K562	OSBPL3	9	7:24902819-24902911	8:10	0.175	0.194444	0.861111	0.804878				-0.648272	0.648272	1.11022e-16	1.17881e-14
SRSF1_K562	HNRPDL	6	4:83347616-83347786	5:7	0.331367	0.304192	0.9625	0.965347				-0.646144	0.646144	0	0
SRSF1_K562	SCMH1	17	1:41499655-41499774	16:18	0.2	0.125	0.8	0.809524				-0.642262	0.642262	1.57483e-11	9.47719e-10
SRSF1_K562	C21orf58	6	21:47734630-47734963	5:7	0.322581	0.4	1	1				-0.63871	0.63871	1.25799e-08	4.99815e-07
SRSF1_K562	USP45	11	6:99915976-99916046	10:12	0.694444	0.645161	0.0625	0				0.638553	0.638553	3.14637e-13	2.31591e-11
SRSF1_K562	HSPA14	4	10:14884133-14884845	3:5	0.233333	0.1875	0.807692	0.88				-0.633429	0.633429	1.93723e-12	1.30147e-10
SRSF1_K562	MMS19	8	10:99236592-99236720	7:9	0.294118	0.283784	0.873684	0.968085				-0.631934	0.631934	0	0
SRSF1_K562	WDR85	5	9:140470161-140470344	4:6	0.0277778	0.03125	0.5625	0.75				-0.626736	0.626736	7.77156e-16	7.88899e-14
SRSF1_K562	CENPO	2	2:25016721-25016834	1:3	0.201681	0.167598	0.809091	0.794118				-0.616965	0.616965	1.49214e-13	1.14387e-11
SRSF1_K562	PTPMT1	2	11:47591252-47591443	1:3	0.181818	0.237569	0.840909	0.780645				-0.601084	0.601084	0	0
SRSF1_K562	CAPN7	20	3:15292438-15292530	19:21	0.388889	0.421053	1	1				-0.595029	0.595029	0	0
SRSF1_K562	ZNF266	8	19:9529438-9529571	7:9	0	0.0588235	0.6	0.647059				-0.594118	0.594118	1.4565e-12	9.92947e-11
SRSF1_K562	PLD1	20	3:171404475-171404588	19:21	0.592593	0.8125	0.0909091	0.138889				0.587647	0.587647	3.71414e-10	1.90608e-08
SRSF1_K562	FAM36A	2	1:245005246-245005360	1:3	0.273381	0.268786	0.878205	0.833333				-0.584686	0.584686	0	0
SRSF1_K562	TMEM218	4	11:124972028-124972247	3:5	0.321429	0.243243	0.8	0.925926				-0.580627	0.580627	1.21619e-11	7.56538e-10
SRSF1_K562	CSPP1	7	8:68004038-68004118	5:8	0.756757	0.780488	0.233333	0.142857				0.580527	0.580527	4.74357e-10	2.38145e-08
SRSF1_K562	AARSD1	3	17:41131567-41131680	1:4	0.361111	0.428571	0.971429	0.977273				-0.579509	0.579509	1.11022e-16	1.17881e-14
SRSF1_K562	ASPH	13	8:62556504-62556560	12:14	0.370861	0.391753	0.944828	0.970149				-0.576182	0.576182	0	0
SRSF1_K562	CEP110	41	9:123933686-123933826	40:42	0.216667	0.144928	0.710526	0.8				-0.574466	0.574466	0	0
SRSF1_K562	OS9	13	12:58113882-58114046	12:14	0.095092	0.10757	0.666667	0.663317				-0.563661	0.563661	0	0
SRSF1_K562	WT1	6	11:32438036-32438086	5:7	0.227848	0.25	0.755102	0.848485				-0.562869	0.562869	3.04539e-06	7.27861e-05
SRSF1_K562	PDE4DIP	47	1:144859759-144859998	46:49	0.282051	0.148148	0.705882	0.842105				-0.558894	0.558894	0.00119811	0.0124705
SRSF1_K562	MYL6	7	12:56554410-56554454	6:8	0.802619	0.803513	0.245872	0.249745				0.555258	0.555258	0	0
SRSF1_K562	DLG1	24	3:196802708-196802741	23:25	0.142857	0.0615385	0.666667	0.621951				-0.542111	0.542111	0	0
SRSF1_K562	ZNF691	3	1:43315226-43315413	2:4	0.315789	0.172414	0.722222	0.846154				-0.540086	0.540086	1.43291e-08	5.62061e-07
SRSF1_K562	OPLAH	10	8:145112351-145112616	9:11	0.266667	0.666667	1	1				-0.533333	0.533333	6.6992e-07	1.91e-05
SRSF1_K562	KIAA0494	7	1:47154025-47154216	6:8	0.933962	0.860759	0.351351	0.376923				0.533224	0.533224	0	0
SRSF1_K562	ZNF317	5	19:9268510-9268751	4:6	0.397059	0.392857	0.931818	0.921569				-0.531735	0.531735	0	0
SRSF1_K562	MECOM	17	3:168825714-168825740	16:18	0.680851	0.777778	0.222222	0.176471				0.529968	0.529968	9.84151e-08	3.42414e-06
SRSF1_K562	SREBF1	9	17:17720862-17720905	8:10	0.205882	0.15625	0.769231	0.647059				-0.527079	0.527079	3.26749e-07	1.00444e-05
SRSF1_K562	RLIM	2	X:73832417-73832478	1:3	0.76	0.782609	0.25	0.25				0.521304	0.521304	1.23374e-06	3.2562e-05
SRSF1_K562	C11orf30	5	11:76165793-76165834	4:6	0.741935	0.727273	0.210526	0.217391				0.520645	0.520645	2.20649e-07	7.06498e-06
SRSF1_K562	ELP2	8	18:33722244-33722310	7:9	0.423077	0.507937	0.989796	0.980716				-0.519749	0.519749	0	0
SRSF1_K562	USP19	6	3:49154492-49154794	5:7	0.310345	0.384615	0.892857	0.833333				-0.515615	0.515615	1.67979e-10	8.94355e-09
SRSF1_K562	UPF3A	8	13:115064315-115064475	7:9	0.369565	0.451852	0.939252	0.910798				-0.514317	0.514317	0	0
SRSF1_K562	C11orf82	4	11:82641199-82641316	3:5	0.142857	0.172414	0.657143	0.685714				-0.513793	0.513793	2.05761e-09	9.2268e-08
SRSF1_K562	CARD8	5	19:48741640-48741789	4:6	0.157895	0.333333	0.885714	0.631579				-0.513033	0.513033	2.45519e-09	1.09037e-07
SRSF1_K562	HSF2	11	6:122749048-122749101	10:12	0.8125	0.842105	0.342105	0.304762				0.503869	0.503869	0	0
SRSF1_K562	RDM1	4	17:34251608-34251776	3:5	0.457143	0.5	0.981818	0.983051				-0.503863	0.503863	1.11022e-16	1.17881e-14
SRSF1_K562	CEP290	52	12:88448117-88448190	51:53	0.23913	0.388889	0.842105	0.788732				-0.501409	0.501409	3.0651e-12	2.01522e-10
SRSF1_K562	NUP88	12	17:5291099-5291272	11:13	0.587302	0.415842	1	1				-0.498428	0.498428	0	0
SRSF1_K562	OSBPL6	5	2:179188904-179188996	3:6	0.381818	0.294118	0.666667	1				-0.495365	0.495365	8.81804e-08	3.10311e-06
SRSF1_K562	CAPN7	17	3:15287033-15287178	16:18	0.83871	0.804598	0.306122	0.346939				0.495123	0.495123	0	0
SRSF1_K562	KIF23	21	15:69733107-69733418	20:22	0.209677	0.225	0.64	0.781609				-0.493466	0.493466	0	0
SRSF1_K562	MSH5	2	6:31708231-31708390	1:3	0.217949	0.305085	0.786885	0.719298				-0.491575	0.491575	2.9976e-15	2.84004e-13
SRSF1_K562	CDK5RAP2	33	9:123169290-123169526	32:34	0.404762	0.430233	0.878049	0.934426				-0.48874	0.48874	0	0
SRSF1_K562	SEC24B	5	4:110402833-110402937	4:6	0.180556	0.1875	0.72549	0.619048				-0.488241	0.488241	4.08562e-14	3.32519e-12
SRSF1_K562	RCOR3	13	1:211485579-211485829	12:14	0.112	0.205607	0.648148	0.644068				-0.487304	0.487304	0	0
SRSF1_K562	BAT2L	31	9:134369792-134369873	30:32	0.0913978	0.0592105	0.62931	0.494949				-0.486826	0.486826	0	0
SRSF1_K562	C1orf63	6	1:25570945-25570989	5:7	0.8	0.568182	0.174825	0.224359				0.484499	0.484499	0	0
SRSF1_K562	IFT20	2	17:26659172-26659408	1:3	0.245902	0.150943	0.571429	0.793103				-0.483843	0.483843	4.04959e-10	2.06105e-08
SRSF1_K562	ZNF215	5	11:6964314-6964446	4:6	0.378378	0.261905	0.933333	0.674419				-0.483734	0.483734	4.47147e-09	1.88415e-07
SRSF1_K562	ENOPH1	3	4:83372196-83372398	2:4	0.390909	0.358974	0.834951	0.878505				-0.481786	0.481786	0	0
SRSF1_K562	FANCI	3	15:89788987-89789070	2:4	0.136364	0	0.659091	0.440678				-0.481703	0.481703	1.19403e-06	3.17383e-05
SRSF1_K562	CC2D1B	24	1:52820037-52820126	23:25	0.0517241	0.0632911	0.479167	0.595745				-0.479948	0.479948	0	0
SRSF1_K562	PIKFYVE	36	2:209212583-209212747	35:37	0.428571	0.430769	0.88	0.9375				-0.47908	0.47908	2.22045e-16	2.29177e-14
SRSF1_K562	TRAPPC2	2	X:13752163-13752304	1:3	0.72549	0.851064	0.278481	0.340426				0.478824	0.478824	1.25455e-14	1.08308e-12
SRSF1_K562	NCOR1	25	17:15990486-15990659	24:26	0.630435	0.571429	0.162162	0.0833333				0.478184	0.478184	1.05144e-09	4.94286e-08
SRSF1_K562	CPNE7	15	16:89657535-89657668	14:16	0.184211	0.28125	0.62069	0.8				-0.477615	0.477615	0.00256841	0.0228022
SRSF1_K562	LEF1	7	4:109002742-109002825	6:8	0.855422	0.705882	0.287879	0.325581				0.473922	0.473922	1.32117e-14	1.13528e-12
SRSF1_K562	ARHGAP12	5	10:32142994-32143134	4:6	0.928571	0.911765	0.545455	0.347826				0.473528	0.473528	2.07153e-10	1.09976e-08
SRSF1_K562	INTS3	15	1:153733496-153733585	14:16	0.037037	0.047619	0.44898	0.581395				-0.472859	0.472859	1.08729e-09	5.07263e-08
SRSF1_K562	FAM122B	6	X:133923610-133923666	5:7	0.792308	0.791667	0.339506	0.298851				0.472809	0.472809	0	0
SRSF1_K562	ST7	15	7:116774178-116774246	14:16	0.727273	0.690476	0.235294	0.236842				0.472806	0.472806	3.33318e-11	1.93042e-09
SRSF1_K562	KLHDC5	4	12:27950180-27950282	3:5	0.342857	0.37037	0.714286	0.941176				-0.471117	0.471117	3.89838e-06	9.0367e-05
SRSF1_K562	C7orf58	14	7:120768436-120768540	13:15	0.524079	0.537671	1	1				-0.469125	0.469125	0	0
SRSF1_K562	SMC5	19	9:72961495-72961565	18:20	0.358025	0.327273	0.75	0.869565				-0.467134	0.467134	2.55229e-12	1.7023e-10
SRSF1_K562	ZNF37A	2	10:38383859-38384152	1:3	0.242424	0.294118	0.733333	0.733333				-0.465062	0.465062	2.13346e-05	0.000410152
SRSF1_K562	ZNF397	4	18:32825226-32825315	3:5	0.545455	0.434783	0.962963	0.945946				-0.464336	0.464336	4.06748e-11	2.31221e-09
SRSF1_K562	CHD3	34	17:7810919-7811020	33:35	0.4125	0.47541	0.90566	0.909091				-0.463421	0.463421	2.65343e-14	2.20821e-12
SRSF1_K562	CTTN	11	11:70267576-70267686	10:12	0.376866	0.375	0.866379	0.806867				-0.46069	0.46069	0	0
SRSF1_K562	QTRTD1	2	3:113775846-113775953	1:3	0.785714	0.875	0.384615	0.354839				0.46063	0.46063	2.64155e-08	1.00005e-06
SRSF1_K562	SDCCAG3	3	9:139303451-139303519	2:4	0.0645161	0.0961538	0.541667	0.539683				-0.46034	0.46034	5.88418e-15	5.32893e-13
SRSF1_K562	TTLL3	9	3:9857758-9857886	8:10	0.16129	0.25	0.658824	0.671053				-0.459293	0.459293	4.46542e-09	1.88415e-07
SRSF1_K562	ARPC4	11	3:9857758-9857886	10:12	0.16129	0.25	0.658824	0.671053				-0.459293	0.459293	4.46542e-09	1.88415e-07
SRSF1_K562	RP11-266J6.1	11	3:9857758-9857886	10:12	0.16129	0.25	0.658824	0.671053				-0.459293	0.459293	4.46542e-09	1.88415e-07
SRSF1_K562	C12orf35	4	12:32133812-32138891	3:5	0.481928	0.5	0.958333	0.9375				-0.456953	0.456953	3.55271e-15	3.3318e-13
SRSF1_K562	SLC38A9	17	5:54923719-54923808	16:18	0.71875	0.37037	1	1				-0.45544	0.45544	1.02822e-10	5.58718e-09
SRSF1_K562	CAPN7	15	3:15282960-15283095	14:16	0.769231	0.672414	0.315217	0.216216				0.455105	0.455105	1.11022e-16	1.17881e-14
SRSF1_K562	BCL2L12	6	19:50173473-50173745	5:7	0.50655	0.450292	0.979381	0.886076				-0.454307	0.454307	0	0
SRSF1_K562	MTIF2	2	2:55495714-55495875	1:3	0.5	0.487365	0.932099	0.961039				-0.452887	0.452887	0	0
SRSF1_K562	KIAA1432	15	9:5753536-5753646	14:16	0.314286	0.448276	0.857143	0.806452				-0.450516	0.450516	1.33933e-07	4.54021e-06
SRSF1_K562	N6AMT2	3	13:21311862-21311944	2:4	0.461538	0.375	0.736842	1				-0.450152	0.450152	0.000530108	0.00641792
SRSF1_K562	HRSP12	2	8:99120874-99120979	1:3	0.50303	0.532787	0.962264	0.968254				-0.44735	0.44735	0	0
SRSF1_K562	RNMT	2	18:13730626-13730754	1:3	0.777778	0.86	0.33	0.419048				0.444365	0.444365	0	0
SRSF1_K562	KIF13A	27	6:17790103-17790141	26:28	0.714286	0.577778	0.191489	0.217391				0.441591	0.441591	1.36301e-11	8.36598e-10
SRSF1_K562	GIPC1	4	19:14593501-14593818	3:5	0.51087	0.507692	0.955556	0.931818				-0.434406	0.434406	9.61453e-14	7.59096e-12
SRSF1_K562	ZFYVE19	8	15:41104897-41105100	7:9	0.326923	0.264706	0.781818	0.677419				-0.433804	0.433804	7.48974e-09	3.06135e-07
SRSF1_K562	TAF5	3	10:105137992-105138307	2:4	0.722222	0.411765	1	1				-0.433007	0.433007	3.03024e-11	1.76049e-09
SRSF1_K562	IBTK	14	6:82921207-82921289	13:15	0.526316	0.588235	1	0.977778				-0.431613	0.431613	1.34467e-09	6.17979e-08
SRSF1_K562	GUSB	6	7:65439906-65440058	5:7	0.25	0.363636	0.692771	0.781022				-0.430078	0.430078	0	0
SRSF1_K562	FOXRED2	4	22:36900145-36900414	3:5	0.454545	0.394737	0.857143	0.851852				-0.429856	0.429856	4.84621e-07	1.43483e-05
SRSF1_K562	ZNF286	4	17:15609701-15609815	3:5	0.555556	0.588235	1	1				-0.428105	0.428105	2.90965e-06	6.98128e-05
SRSF1_K562	FAHD2A	2	2:96071025-96071150	1:3	0.121212	0.217391	0.633333	0.560976				-0.427853	0.427853	3.99401e-07	1.20768e-05
SRSF1_K562	RP11-266J6.1	15	3:9867484-9867632	14:16	0.471698	0.659574	0.975904	1				-0.422316	0.422316	0	0
SRSF1_K562	ARPC4	15	3:9867484-9867632	14:16	0.471698	0.659574	0.975904	1				-0.422316	0.422316	0	0
SRSF1_K562	TTLL3	13	3:9867484-9867632	12:14	0.471698	0.659574	0.975904	1				-0.422316	0.422316	0	0
SRSF1_K562	OCRL	19	X:128718321-128718344	18:20	0.488889	0.405405	0.0243902	0.025641				0.422132	0.422132	1.98714e-11	1.18047e-09
SRSF1_K562	LIX1L	4	1:145497393-145497488	3:5	0.55102	0.605263	1	1				-0.421858	0.421858	0	0
SRSF1_K562	MUC1	9	1:155159206-155159367	8:10	0.411765	0.428571	0	0				0.420168	0.420168	1.36786e-09	6.25525e-08
SRSF1_K562	ENTPD6	11	20:25201868-25201969	10:12	0.47619	0.526316	0.84	1				-0.418747	0.418747	1.50644e-05	0.000304594
SRSF1_K562	SS18L1	2	20:60729337-60729521	1:3	0.666667	0.717391	0.323529	0.230769				0.41488	0.41488	5.04223e-07	1.48772e-05
SRSF1_K562	DCLRE1B	2	1:114449618-114449783	1:3	0.531915	0.444444	0.914894	0.890909				-0.414722	0.414722	5.84086e-10	2.86994e-08
SRSF1_K562	ZCCHC6	12	9:88941286-88941406	11:13	0.333333	0.714286	0.153846	0.0689655				0.412404	0.412404	0.00412688	0.0329919
SRSF1_K562	GPBP1	8	5:56532940-56532999	7:9	0.52381	0.623188	0.206009	0.118143				0.411423	0.411423	0	0
SRSF1_K562	ABI2	12	2:204276008-204276094	11:13	0.833333	0.793651	0.428571	0.376812				0.410801	0.410801	1.32337e-11	8.14978e-10
SRSF1_K562	RTN2	7	19:45992604-45992811	6:8	0.469136	0.554217	0.938776	0.902439				-0.408931	0.408931	3.86402e-12	2.52254e-10
SRSF1_K562	PPT2	2	6:32121622-32122181	1:3	0.477273	0.464286	0.809524	0.944444				-0.406205	0.406205	5.15421e-06	0.000115735
SRSF1_K562	SYNRG	23	17:35880282-35880317	22:24	0.965517	1	0.47619	0.678571				0.405378	0.405378	6.02113e-09	2.51107e-07
SRSF1_K562	DNAH8	33	6:38802355-38802417	32:34	0.708333	0.833333	0.25	0.482759				0.404454	0.404454	0.000381705	0.00483345
SRSF1_K562	LSM14A	5	19:34706029-34706205	4:6	0.511655	0.452196	0.893916	0.878613				-0.404339	0.404339	0	0
SRSF1_K562	SCOC	6	4:141300723-141300806	5:7	0.542453	0.607362	0.975	0.982014				-0.4036	0.4036	0	0
SRSF1_K562	ASB1	3	2:239344352-239344654	2:4	0.692308	0.34375	0.947368	0.894737				-0.403024	0.403024	3.31944e-06	7.82832e-05
SRSF1_K562	KDM5A	28	12:395292-395373	27:29	0.5625	0.436364	0.0833333	0.111111				0.40221	0.40221	1.18802e-10	6.43656e-09
SRSF1_K562	DIAPH1	2	5:140967791-140967817	1:3	0.843243	0.791045	0.441558	0.388889				0.40192	0.40192	0	0
SRSF1_K562	FIP1L1	14	4:54306749-54306775	13:15	0.694444	0.770642	0.341463	0.323529				0.400047	0.400047	0	0
SRSF1_K562	DMD	85	X:31144759-31144790	84:86	0.509804	0.518519	0.1	0.130435				0.398944	0.398944	2.59556e-08	9.84662e-07
SRSF1_K562	VEZT	9	12:95656682-95656857	8:10	0.545455	0.657895	1	1				-0.398325	0.398325	1.29008e-13	1.00566e-11
SRSF1_K562	MAP3K8	2	10:30726105-30726335	1:3	0.902439	0.931034	0.391304	0.647059				0.397555	0.397555	1.01237e-06	2.7668e-05
SRSF1_K562	FN1	40	2:216236832-216237098	39:41	0.566667	0.610169	0.971429	1				-0.397296	0.397296	1.91653e-11	1.14219e-09
SRSF1_K562	CEP250	23	20:34078463-34078630	22:24	0.62069	0.526316	1	0.939394				-0.396194	0.396194	1.0167e-07	3.5241e-06
SRSF1_K562	BAX	3	19:49458944-49459090	2:4	0.491803	0.569767	0.967033	0.883721				-0.394592	0.394592	0	0
SRSF1_K562	ZBTB43	2	9:129571072-129571194	1:3	0.677419	0.789474	0.371429	0.307692				0.393886	0.393886	5.11517e-05	0.000875837
SRSF1_K562	FLNA	30	X:153585619-153585642	29:31	0.195804	0.208791	0.59127	0.60101				-0.393842	0.393842	0	0
SRSF1_K562	AARSD1	6	17:41123624-41123713	5:7	0.567568	0.5	0.883333	0.969697				-0.392731	0.392731	4.08573e-11	2.31546e-09
SRSF1_K562	C13orf27	2	13:103422362-103422436	1:3	0.784615	0.924242	0.45	0.473684				0.392587	0.392587	6.30695e-12	4.06161e-10
SRSF1_K562	SPTAN1	24	9:131355262-131355321	23:25	0.7	0.72	0.35	0.285714				0.392143	0.392143	0.000649911	0.00755186
SRSF1_K562	HAUS4	5	14:23420764-23420898	4:6	0.568421	0.526882	0.925926	0.953368				-0.391996	0.391996	0	0
SRSF1_K562	FAM173B	5	5:10235323-10235373	4:6	0.942529	0.987013	0.516129	0.631579				0.390917	0.390917	6.18505e-13	4.37812e-11
SRSF1_K562	PGPEP1	5	19:18468193-18468425	4:6	0.423729	0.408163	0.84	0.77193				-0.390019	0.390019	5.76803e-09	2.41096e-07
SRSF1_K562	CHID1	12	11:893427-893519	11:13	0.75	0.809524	0.428571	0.354167				0.388393	0.388393	7.42206e-11	4.06892e-09
SRSF1_K562	SAPS2	18	22:50875417-50875497	17:19	0.534483	0.526316	0.966102	0.870968				-0.388135	0.388135	3.60196e-11	2.07309e-09
SRSF1_K562	APAF1	18	12:99097149-99097277	17:19	0.564516	0.550725	0.144578	0.196078				0.387292	0.387292	1.23279e-12	8.49844e-11
SRSF1_K562	NAP1L4	16	11:2970457-2970494	15:17	0.889855	0.843844	0.479042	0.483146				0.385755	0.385755	0	0
SRSF1_K562	ALG13	21	X:110971413-110971533	20:22	0.605263	0.625	1	1				-0.384868	0.384868	1.35447e-14	1.15851e-12
SRSF1_K562	CD33	2	19:51728474-51728854	1:3	0.0491803	0.0444444	0.415584	0.447761				-0.38486	0.38486	0	0
SRSF1_K562	MAX	2	14:65568264-65568290	1:3	0.903226	0.839506	0.413793	0.559524				0.384708	0.384708	3.9968e-15	3.69205e-13
SRSF1_K562	MAD1L1	4	7:2265045-2265185	3:5	0.521739	0.431818	0.947368	0.772727				-0.383269	0.383269	0.00690219	0.0488949
SRSF1_K562	C6orf167	7	6:97717983-97718159	6:8	0.508772	0.512195	0.16	0.0945946				0.383186	0.383186	2.18512e-10	1.15343e-08
SRSF1_K562	KIAA1191	3	5:175786484-175786570	2:4	0.276316	0.313433	0.616438	0.735294				-0.380992	0.380992	2.32063e-10	1.218e-08
SRSF1_K562	DAP3	7	1:155691308-155691409	6:8	0.580913	0.539886	0.949254	0.931596				-0.380025	0.380025	0	0
SRSF1_K562	GK5	10	3:141903553-141904635	9:11	0.24	0.105263	0.5	0.605263				-0.38	0.38	7.45196e-07	2.0987e-05
SRSF1_K562	CARM1	15	19:11032051-11032119	14:16	0.12	0.132812	0.477273	0.532468				-0.378464	0.378464	1.11022e-16	1.17881e-14
SRSF1_K562	OCEL1	4	19:17338649-17338814	3:5	0.425	0.473684	0.755556	0.897436				-0.377154	0.377154	9.59692e-07	2.63061e-05
SRSF1_K562	SLC25A14	6	X:129484620-129484705	5:7	0.941176	0.918919	0.5	0.607143				0.376476	0.376476	7.85915e-07	2.20331e-05
SRSF1_K562	RC3H1	20	1:173912580-173912753	19:21	0.589744	0.515152	0.857143	1				-0.376124	0.376124	9.60314e-05	0.00149216
SRSF1_K562	KDM6A	13	X:44919267-44919401	12:14	0.814815	0.84	0.454545	0.448276				0.375997	0.375997	2.44778e-05	0.000459114
SRSF1_K562	KTN1	44	14:56139890-56139973	43:45	0.603448	0.6	0.24937	0.204082				0.374998	0.374998	0	0
SRSF1_K562	DEDD2	3	19:42720832-42721197	2:4	0.209877	0.197802	0.617647	0.538462				-0.374215	0.374215	9.04979e-08	3.16657e-06
SRSF1_K562	SCML2	15	X:18260559-18260710	14:16	0.236025	0.264706	0.581395	0.663462				-0.372063	0.372063	9.99201e-16	9.9785e-14
SRSF1_K562	TAF9B	4	X:77393246-77393380	3:5	0.711538	0.545455	1	1				-0.371503	0.371503	0	0
SRSF1_K562	CD46	7	1:207940952-207940996	6:8	0.408983	0.416667	0.0529595	0.0327869				0.369952	0.369952	0	0
SRSF1_K562	CTAGE5	21	14:39790132-39790260	20:22	0.851064	0.8	0.448276	0.463415				0.369687	0.369687	1.06036e-06	2.88204e-05
SRSF1_K562	CD46	13	1:207963598-207963690	12:14	0.75179	0.738571	0.377901	0.375506				0.368477	0.368477	0	0
SRSF1_K562	TMX2	3	11:57505308-57505498	2:4	0.50081	0.507491	0.846154	0.899015				-0.368434	0.368434	0	0
SRSF1_K562	DIS3	3	13:73354984-73355141	2:4	0.860465	0.911765	0.576271	0.460526				0.367716	0.367716	1.67921e-12	1.13639e-10
SRSF1_K562	FAN1	5	15:31202817-31203018	4:6	0.615385	0.428571	0.777778	1				-0.366911	0.366911	5.83676e-06	0.000128988
SRSF1_K562	MAP3K3	3	17:61712069-61712161	2:4	0.548387	0.62963	0.114286	0.333333				0.365199	0.365199	1.34244e-05	0.000274353
SRSF1_K562	CLASP1	30	2:122166600-122166623	28:31	0.5	0.37931	0.0547945	0.0943396				0.365088	0.365088	2.29838e-12	1.5385e-10
SRSF1_K562	BPTF	6	17:65871672-65871860	5:7	0.6	0.566667	0.928571	0.967742				-0.364823	0.364823	1.02069e-07	3.53134e-06
SRSF1_K562	SFRS18	11	6:99851705-99851758	10:12	0.668605	0.764286	0.368159	0.33871				0.363011	0.363011	0	0
SRSF1_K562	EYA3	7	1:28354300-28354437	6:8	0.743802	0.656489	0.361111	0.315152				0.362014	0.362014	1.87124e-05	0.000366997
SRSF1_K562	CSDA	6	12:10862507-10862713	5:7	0.253623	0.418605	0.685083	0.710059				-0.361457	0.361457	3.93477e-09	1.69452e-07
SRSF1_K562	EFHD2	3	1:15753646-15753780	2:4	0.551948	0.477941	0.927273	0.823529				-0.360456	0.360456	6.73328e-12	4.31935e-10
SRSF1_K562	YIPF1	12	1:54320674-54320724	11:13	0.644444	0.789474	0.285714	0.428571				0.359816	0.359816	0.000188174	0.00265181
SRSF1_K562	CENPE	17	4:104084636-104084710	16:18	0.517857	0.564103	0.1875	0.176471				0.358995	0.358995	9.96835e-09	4.00359e-07
SRSF1_K562	SOHLH2	4	13:36857606-36857646	3:6	1	1	0.628571	0.653846				0.358791	0.358791	2.36719e-08	9.01727e-07
SRSF1_K562	HMGN1	6	21:40719305-40719409	5:7	0.301075	0.423077	0.75	0.690909				-0.358378	0.358378	5.46925e-09	2.29647e-07
SRSF1_K562	KIAA0100	19	17:26960567-26960769	18:20	0.633333	0.596491	1	0.945312				-0.357744	0.357744	0	0
SRSF1_K562	HSPA14	9	10:14893218-14893322	8:10	0.565957	0.565217	0.891304	0.954128				-0.357129	0.357129	0	0
SRSF1_K562	IDI1	5	10:1089939-1092402	1:6	0.803526	0.790191	0.447608	0.434599				0.355755	0.355755	0	0
SRSF1_K562	ZNF789	3	7:99075897-99075979	2:4	0.2	0.142857	0.625	0.428571				-0.355357	0.355357	0.00154622	0.0153335
SRSF1_K562	C1orf9	4	1:172522400-172522510	3:5	0.318182	0.486486	0.75	0.764706				-0.355019	0.355019	8.01491e-06	0.000170202
SRSF1_K562	HNRNPD	7	4:83277690-83277836	6:8	0.204556	0.208209	0.568008	0.554318				-0.35478	0.35478	0	0
SRSF1_K562	UBN1	17	16:4927386-4927475	16:18	0.883721	0.95122	0.692308	0.434783				0.353925	0.353925	2.61233e-06	6.35038e-05
SRSF1_K562	PCGF3	4	4:726189-726287	3:5	0.08	0.0357143	0.411765	0.409091				-0.352571	0.352571	1.9903e-05	0.000385438
SRSF1_K562	FTSJ3	14	17:61899344-61899528	13:15	0.5	0.761905	0.989474	0.977528				-0.352549	0.352549	5.24081e-12	3.39733e-10
SRSF1_K562	PPP3CC	14	8:22396982-22397011	13:15	0.948276	0.909091	0.710526	0.444444				0.351198	0.351198	1.8215e-07	5.99481e-06
SRSF1_K562	KLHDC10	2	7:129736761-129736847	1:3	0.0416667	0.0267857	0.336634	0.432432				-0.350307	0.350307	0	0
SRSF1_K562	PGBD1	3	6:28253328-28253484	2:4	0.8	0.5	1	1				-0.35	0.35	2.94433e-10	1.52799e-08
SRSF1_K562	AZIN1	3	8:103862227-103862372	2:4	0.80791	0.83125	0.477612	0.461864				0.349842	0.349842	0	0
SRSF1_K562	LSM1	3	8:38027320-38027435	2:4	0.56196	0.602941	0.949153	0.914966				-0.349609	0.349609	0	0
SRSF1_K562	NUBP1	9	16:10855614-10855716	8:11	0.631148	0.671053	1	1				-0.3489	0.3489	0	0
SRSF1_K562	LRCH3	15	3:197585705-197585776	14:16	0.833333	0.8	0.535714	0.4				0.34881	0.34881	0.000176246	0.00250908
SRSF1_K562	CASP8	10	2:202137621-202137665	9:11	0.897436	0.84375	0.589744	0.454545				0.348448	0.348448	3.92811e-06	9.09422e-05
SRSF1_K562	YY1AP1	3	1:155657862-155657992	2:4	0.217391	0.260163	0.542857	0.630435				-0.347869	0.347869	5.5408e-10	2.72977e-08
SRSF1_K562	FCHO1	21	19:17889418-17889693	20:22	0.625	0.681818	1	1				-0.346591	0.346591	1.48133e-06	3.82764e-05
SRSF1_K562	ST6GALNAC4	5	9:130672230-130672337	4:6	0.609756	0.54902	0.933333	0.916667				-0.345612	0.345612	1.31825e-06	3.44478e-05
SRSF1_K562	FBXL4	8	6:99328429-99328500	7:9	0.863636	0.941176	0.55814	0.555556				0.345559	0.345559	6.55595e-05	0.00108434
SRSF1_K562	ZNF714	2	19:21266784-21266875	1:3	0.677419	0.607143	0.972222	1				-0.34383	0.34383	1.93586e-08	7.48222e-07
SRSF1_K562	COL4A3BP	12	5:74695135-74695212	11:13	0.55102	0.407895	0.133333	0.137931				0.343825	0.343825	2.78522e-12	1.84433e-10
SRSF1_K562	ELOVL7	2	5:60095007-60095057	1:3	0.956522	1	0.590909	0.682927				0.341343	0.341343	2.7183e-06	6.56478e-05
SRSF1_K562	PRMT3	2	11:20409565-20409700	1:3	0.478261	0.527778	0.864865	0.823529				-0.341178	0.341178	1.03444e-07	3.57219e-06
SRSF1_K562	DHPS	8	19:12787918-12788025	7:9	0.54902	0.593407	0.909677	0.914729				-0.34099	0.34099	0	0
SRSF1_K562	HUWE1	53	X:53589792-53589890	52:54	0.544118	0.588983	0.921824	0.891986				-0.340355	0.340355	0	0
SRSF1_K562	HMGN1	7	21:40717756-40719218	6:8	0.881081	0.902256	0.527559	0.576923				0.339427	0.339427	0	0
SRSF1_K562	PEX5	11	12:7354837-7354947	10:12	0.862069	0.84	0.509091	0.515152				0.338913	0.338913	1.79712e-07	5.9289e-06
SRSF1_K562	SDHA	4	5:225534-225677	3:5	0.628524	0.669421	0.98778	0.987448				-0.338641	0.338641	0	0
SRSF1_K562	PHKB	2	16:47497793-47497904	1:3	0.802632	0.814815	0.524138	0.416667				0.338321	0.338321	1.39799e-12	9.5659e-11
SRSF1_K562	TOR2A	4	9:130494843-130494970	3:5	0.535714	0.5625	1	0.772727				-0.337256	0.337256	9.83346e-05	0.00152538
SRSF1_K562	CASC4	11	15:44695085-44695387	10:13	0.342466	0.4	0.689024	0.727273				-0.336916	0.336916	1.11022e-16	1.17881e-14
SRSF1_K562	TRIM33	20	1:114940562-114940612	19:21	0.820809	0.889655	0.615385	0.42623				0.334425	0.334425	0	0
SRSF1_K562	MTERFD2	2	2:242038811-242039910	1:3	0.333333	0.487179	0.73913	0.75				-0.334309	0.334309	0.000796375	0.00899879
SRSF1_K562	POC1A	10	3:52130585-52130728	9:11	0.326087	0.333333	0.6875	0.64				-0.33404	0.33404	4.22782e-05	0.000745315
SRSF1_K562	ZNF397	2	18:32822355-32822848	1:3	0.691176	0.589286	0.981818	0.964286				-0.332821	0.332821	1.21217e-11	7.56538e-10
SRSF1_K562	MFGE8	9	15:89442887-89443042	8:10	0.489051	0.506849	0.856459	0.804598				-0.332578	0.332578	9.03111e-12	5.71403e-10
SRSF1_K562	SUGP2	14	19:19103397-19104549	13:15	0.854701	0.950617	0.534884	0.607143				0.331646	0.331646	3.75922e-13	2.72359e-11
SRSF1_K562	RP11-121N13.3	2	13:36869915-36869994	1:3	0.907407	0.923077	0.657143	0.511111				0.331115	0.331115	2.88005e-08	1.07929e-06
SRSF1_K562	C13orf38	2	13:36869915-36869994	1:3	0.907407	0.923077	0.657143	0.511111				0.331115	0.331115	2.88005e-08	1.07929e-06
SRSF1_K562	SOHLH2	2	13:36869915-36869994	1:3	0.907407	0.923077	0.657143	0.511111				0.331115	0.331115	2.88005e-08	1.07929e-06
SRSF1_K562	CCDC18	8	1:93671067-93671188	7:9	0.962963	1	0.740741	0.560976				0.330623	0.330623	1.0628e-06	2.88329e-05
SRSF1_K562	DCAF11	4	14:24586126-24586253	3:5	0.625	0.698113	0.982456	1				-0.329671	0.329671	4.16134e-12	2.70707e-10
SRSF1_K562	RAB9A	2	X:13721933-13722021	1:3	0.819672	0.882353	0.511628	0.531915				0.329241	0.329241	1.16435e-06	3.10859e-05
SRSF1_K562	WDR67	15	8:124140521-124140753	14:16	0.557143	0.490909	0.848485	0.857143				-0.328788	0.328788	6.61552e-06	0.00014396
SRSF1_K562	MAST2	25	1:46494440-46494605	24:26	0.764706	0.578947	1	1				-0.328173	0.328173	4.11229e-10	2.08721e-08
SRSF1_K562	AP1G2	18	14:24031171-24031316	17:19	0.6	0.647059	0.971429	0.931034				-0.327702	0.327702	2.23982e-05	0.000428185
SRSF1_K562	FAHD2B	2	2:97757600-97757722	1:3	0.55814	0.675676	0.926829	0.962264				-0.327639	0.327639	4.48264e-08	1.63025e-06
SRSF1_K562	SCIN	14	7:12683763-12683940	13:15	0.725	0.62069	1	1				-0.327155	0.327155	4.38054e-11	2.47494e-09
SRSF1_K562	GPBP1L1	2	1:46151248-46151292	1:3	0.893855	0.901099	0.496	0.644928				0.327013	0.327013	0	0
SRSF1_K562	MLLT10	19	10:21977420-21977467	18:21	0.693548	0.586207	0.266667	0.36				0.326544	0.326544	3.84096e-05	0.000688949
SRSF1_K562	C4orf21	5	4:113544973-113545032	3:6	0.591549	0.66	1	0.902439				-0.325445	0.325445	2.31404e-07	7.38373e-06
SRSF1_K562	ARHGEF11	8	1:156941489-156941608	7:9	0.4	0.45	0.8	0.7				-0.325	0.325	0.00284281	0.0245539
SRSF1_K562	TREX2	11	X:152720335-152720511	10:12	0.793103	0.766234	0.489362	0.422222				0.323877	0.323877	2.62348e-07	8.28527e-06
SRSF1_K562	HAUS7	13	X:152720335-152720511	12:14	0.793103	0.766234	0.489362	0.422222				0.323877	0.323877	2.62348e-07	8.28527e-06
SRSF1_K562	NEU3	3	11:74705554-74705765	2:4	0.586207	0.633333	0.961538	0.904762				-0.32338	0.32338	4.94425e-05	0.000853692
SRSF1_K562	HERC3	17	4:89597369-89597392	16:18	0.83871	0.769231	0.394737	0.566667				0.323268	0.323268	6.63135e-05	0.00109583
SRSF1_K562	DNAJC2	5	7:102967779-102967825	4:6	0.425339	0.464286	0.146341	0.0968858				0.323199	0.323199	5.22969e-11	2.91899e-09
SRSF1_K562	TMEM222	3	1:27657476-27657628	2:4	0.176471	0.138462	0.477273	0.483871				-0.323106	0.323106	8.87382e-07	2.45425e-05
SRSF1_K562	MELK	5	9:36594625-36594768	4:6	0.322222	0.319444	0.635417	0.652174				-0.322962	0.322962	7.90029e-09	3.20083e-07
SRSF1_K562	MPRIP	20	17:17078607-17078726	19:21	0.6875	0.619048	1	0.947368				-0.32041	0.32041	7.87643e-06	0.000167453
SRSF1_K562	POLB	2	8:42196530-42196587	1:3	0.885057	0.866667	0.571429	0.541096				0.3196	0.3196	0	0
SRSF1_K562	AF196779.12	7	X:48935302-48935406	6:8	0.758242	0.844156	0.455696	0.508475				0.319113	0.319113	3.99833e-09	1.7139e-07
SRSF1_K562	WDR45	9	X:48935302-48935406	8:10	0.758242	0.844156	0.455696	0.508475				0.319113	0.319113	3.99833e-09	1.7139e-07
SRSF1_K562	NOL8	10	9:95073428-95073541	9:11	0.511905	0.56	0.852941	0.855422				-0.318229	0.318229	2.25042e-13	1.67647e-11
SRSF1_K562	CRELD1	11	3:9985586-9985779	10:12	0.285714	0.297297	0.534483	0.680851				-0.316161	0.316161	1.37294e-05	0.000280277
SRSF1_K562	KLHL20	2	1:173684704-173684793	1:3	0.211538	0.233333	0.575758	0.5				-0.315443	0.315443	9.90708e-05	0.00153423
SRSF1_K562	ZNF195	7	11:3381950-3382018	6:8	0.577778	0.25	0.12766	0.0714286				0.314345	0.314345	2.03234e-06	5.08775e-05
SRSF1_K562	AASDH	14	4:57209001-57209132	13:15	0.538462	0.793103	0.977273	0.982456				-0.314082	0.314082	1.47019e-09	6.69007e-08
SRSF1_K562	KIF23	9	15:69717621-69717662	8:10	0.0925926	0.103448	0.402597	0.421569				-0.314063	0.314063	5.07261e-13	3.63242e-11
SRSF1_K562	VWDE	4	7:12428434-12428583	3:5	0.757576	0.744186	0.374233	0.503937				0.311796	0.311796	0.00011987	0.00180784
SRSF1_K562	GPR98	14	5:89939620-89939800	13:15	0.565217	0.526316	0.903226	0.810811				-0.311252	0.311252	4.43827e-05	0.000777223
SRSF1_K562	ZNF720	4	16:31744832-31744948	3:5	0.25	0.444444	0	0.0731707				0.310637	0.310637	2.1036e-05	0.000405256
SRSF1_K562	TTC17	20	11:43467481-43468079	19:21	0.180851	0.151899	0.453125	0.5				-0.310188	0.310188	6.68108e-09	2.7552e-07
SRSF1_K562	THEM4	3	1:151862459-151862690	2:4	0.0862069	0.0967742	0.387755	0.415094				-0.309934	0.309934	4.99582e-08	1.79568e-06
SRSF1_K562	FAM96A	3	15:64373301-64373350	2:4	0.888889	0.874016	0.558095	0.58529				0.30976	0.30976	0	0
SRSF1_K562	SMC4	2	3:160118416-160118757	1:3	0.589286	0.569231	0.900901	0.875				-0.308692	0.308692	6.55032e-15	5.87462e-13
SRSF1_K562	ATG4D	4	19:10657515-10657791	3:5	0.6875	0.695652	1	1				-0.308424	0.308424	1.05653e-05	0.000220061
SRSF1_K562	UBAP2	10	9:33963724-33963789	9:11	0.721805	0.561224	0.927711	0.971429				-0.308055	0.308055	2.53908e-13	1.88392e-11
SRSF1_K562	TMEM168	2	7:112428509-112428599	1:3	0.357143	0.323529	0.0294118	0.0357143				0.307773	0.307773	1.24607e-06	3.27471e-05
SRSF1_K562	PHF14	15	7:11101418-11101468	14:16	0.583333	0.676923	0.940678	0.934959				-0.30769	0.30769	1.33227e-15	1.30924e-13
SRSF1_K562	MELK	3	9:36583624-36583709	2:4	0.278571	0.302326	0.619048	0.575472				-0.306811	0.306811	4.73134e-10	2.38145e-08
SRSF1_K562	ATOX1	2	5:151131265-151131340	1:3	0.613402	0.556054	0.884328	0.898148				-0.30651	0.30651	7.57504e-10	3.62562e-08
SRSF1_K562	CHD1L	11	1:146742593-146742666	10:12	0.469388	0.4375	0.778523	0.741176				-0.306406	0.306406	4.95712e-11	2.77524e-09
SRSF1_K562	RBM10	4	X:47030427-47030657	3:5	0.647887	0.6875	0.966667	0.981481				-0.30638	0.30638	2.46089e-11	1.45721e-09
SRSF1_K562	LEF1	13	4:108984779-108984819	12:15	0.880597	0.893939	0.62069	0.541667				0.30609	0.30609	4.60243e-08	1.66074e-06
SRSF1_K562	FAR1	6	11:13733311-13733355	5:7	0.671429	0.693333	0.976562	1				-0.3059	0.3059	0	0
SRSF1_K562	USPL1	2	13:31195210-31195376	1:3	0.341463	0.347826	0.724138	0.575758				-0.305303	0.305303	0.000856713	0.00952906
SRSF1_K562	MPHOSPH9	10	12:123687661-123687922	9:11	0.243902	0.214286	0.583333	0.485294				-0.30522	0.30522	3.19345e-08	1.18949e-06
SRSF1_K562	POLA1	3	X:24721368-24721464	2:4	0.740741	0.65	1	1				-0.30463	0.30463	3.93315e-09	1.69452e-07
SRSF1_K562	RIF1	32	2:152324988-152325065	31:33	0.231884	0.166667	0.534653	0.470085				-0.303094	0.303094	9.39249e-14	7.46508e-12
SRSF1_K562	VEZT	7	12:95650326-95650398	6:8	0.383333	0.211538	0.676056	0.52381				-0.302497	0.302497	1.19743e-06	3.17383e-05
SRSF1_K562	FBXO38	15	5:147806776-147807510	14:16	0.54	0.5	0.8	0.844828				-0.302414	0.302414	5.89488e-07	1.71508e-05
SRSF1_K562	GRIPAP1	13	X:48844199-48844291	12:14	0.666667	0.719298	0.987952	1				-0.300993	0.300993	8.88178e-15	7.85124e-13
SRSF1_K562	NF2	17	22:30078968-30079068	16:19	0.378378	0.318182	0.0952381	0				0.300661	0.300661	0.00017234	0.00246194
SRSF1_K562	KIAA0101	3	15:64668942-64669104	2:4	0.539055	0.539014	0.843198	0.835198				-0.300164	0.300164	0	0
SRSF1_K562	LGALS8	12	1:236706215-236706340	11:13	0.847953	0.794118	0.551724	0.491525				0.299411	0.299411	9.41469e-14	7.46508e-12
SRSF1_K562	ASXL1	6	20:30959581-30959677	5:7	0.1	0.111111	0.423077	0.384615				-0.298291	0.298291	0.000885475	0.00979004
SRSF1_K562	FAM91A1	21	8:124820512-124820616	20:22	0.745098	0.658537	1	1				-0.298183	0.298183	4.00159e-11	2.28177e-09
SRSF1_K562	ARIH2	3	3:48962151-48962272	2:4	0.27551	0.238806	0.647887	0.461538				-0.297555	0.297555	2.7333e-07	8.57347e-06
SRSF1_K562	C10orf137	7	10:127417572-127417673	6:8	0.8	1	0.684211	0.521739				0.297025	0.297025	0.00193904	0.0182309
SRSF1_K562	FAM40B	11	7:129098553-129098618	10:12	0.634146	0.763158	0.990909	1				-0.296802	0.296802	8.43769e-15	7.49454e-13
SRSF1_K562	OMA1	6	1:58996273-58996401	5:7	0.551724	0.588235	0.842857	0.890625				-0.296761	0.296761	4.96685e-05	0.000855994
SRSF1_K562	NCOR2	47	12:124811955-124812179	46:48	0.590909	0.682927	0.961538	0.904762				-0.296232	0.296232	5.26949e-07	1.54776e-05
SRSF1_K562	OSBPL3	12	7:24888688-24888795	11:13	0.970149	0.862745	0.633333	0.607843				0.295859	0.295859	4.18033e-08	1.52934e-06
SRSF1_K562	U2AF1	4	21:44520563-44520629	3:5	0.849598	0.850073	0.559761	0.555328				0.292291	0.292291	0	0
SRSF1_K562	FNBP4	12	11:47753669-47753771	11:13	0.637363	0.568966	0.253333	0.368421				0.292287	0.292287	2.21497e-07	7.07986e-06
SRSF1_K562	KIAA0391	4	14:35595941-35595988	3:5	0.563636	0.666667	0.942308	0.871429				-0.291717	0.291717	4.78513e-07	1.41902e-05
SRSF1_K562	C2CD2	14	21:43319162-43319471	13:17	0.666667	0.75	1	1				-0.291667	0.291667	0.00038771	0.00488605
SRSF1_K562	IKZF1	8	7:50455043-50455168	7:9	0.74	0.619048	0.957143	0.984615				-0.291355	0.291355	5.35515e-10	2.65954e-08
SRSF1_K562	C13orf34	3	13:73305419-73305525	2:4	0.963415	0.936508	0.74359	0.574074				0.291129	0.291129	4.89596e-10	2.4513e-08
SRSF1_K562	ENOSF1	14	18:678696-678737	13:15	0.574074	0.416667	0.746032	0.826923				-0.291107	0.291107	2.95623e-06	7.07465e-05
SRSF1_K562	NCOR1	10	17:16054904-16054930	9:11	0.5375	0.514286	0.183333	0.288136				0.290158	0.290158	1.4118e-06	3.66849e-05
SRSF1_K562	STK19	3	6:31940398-31940534	2:4	0.5	0.41791	0.770833	0.727273				-0.290098	0.290098	1.32215e-05	0.000270507
SRSF1_K562	GPR107	16	9:132872649-132872705	14:18	0.495146	0.5	0.21978	0.195652				0.289857	0.289857	3.13969e-09	1.3713e-07
SRSF1_K562	TRIM68	2	11:4626309-4626791	1:3	0.588235	0.833333	1	1				-0.289216	0.289216	0.00027143	0.00364439
SRSF1_K562	C15orf17	2	15:75198619-75198706	1:3	0.566667	0.636364	0.78125	1				-0.28911	0.28911	0.00136182	0.0138013
SRSF1_K562	MTMR1	4	X:149880814-149880837	3:5	0.358974	0.268293	0.0263158	0.0243902				0.288281	0.288281	3.14832e-07	9.74291e-06
SRSF1_K562	R3HDM1	16	2:136399106-136399360	15:17	0.6	0.45	0.1875	0.287671				0.287414	0.287414	1.63037e-06	4.1489e-05
SRSF1_K562	ZNF512	2	2:27806293-27806583	1:3	0.211765	0.156028	0.492063	0.450549				-0.28741	0.28741	9.99201e-16	9.9785e-14
SRSF1_K562	CDC16	15	13:115027362-115027423	14:16	0.985401	0.992593	0.668639	0.734694				0.287331	0.287331	0	0
SRSF1_K562	DLEU1	2	13:50657278-50657330	1:4	0.550459	0.556818	0.256637	0.277778				0.286431	0.286431	1.35127e-09	6.19473e-08
SRSF1_K562	ZMYND8	29	20:45841287-45841370	28:30	0.528169	0.57377	0.240196	0.289773				0.285985	0.285985	8.78186e-14	7.02359e-12
SRSF1_K562	YIPF1	5	1:54348786-54348949	4:6	0.622951	0.534884	0.854545	0.875				-0.285855	0.285855	2.10871e-06	5.2434e-05
SRSF1_K562	PHF1	12	6:33382732-33382921	11:13	0.666667	0.692308	0.970588	0.96				-0.285807	0.285807	2.03582e-06	5.0885e-05
SRSF1_K562	TAF5	8	10:105145083-105145247	7:9	0.761905	0.666667	1	1				-0.285714	0.285714	1.94196e-05	0.000376867
SRSF1_K562	PK4P	21	2:159533251-159533379	20:22	0.214286	0.175258	0.481633	0.477778				-0.284933	0.284933	0	0
SRSF1_K562	AMHR2	9	12:53823615-53823762	8:10	0.484848	0.619048	0.9	0.772727				-0.284416	0.284416	0.000462874	0.00572014
SRSF1_K562	ADAMTSL4	3	1:150523091-150524367	2:4	0.368421	0.146341	0.534247	0.549296				-0.28439	0.28439	2.24116e-05	0.000428185
SRSF1_K562	VPS13D	41	1:12398288-12398362	40:42	0.509434	0.37037	0.0769231	0.235294				0.283794	0.283794	5.89439e-06	0.000129951
SRSF1_K562	SBNO1	2	12:123842356-123842399	1:3	0.363636	0.301587	0.1	0				0.282612	0.282612	1.82359e-07	5.99481e-06
SRSF1_K562	XRCC3	2	14:104179212-104179305	1:3	0.179487	0.217391	0.446809	0.515152				-0.282541	0.282541	0.000129962	0.00193945
SRSF1_K562	PRC1	14	15:91512309-91512350	13:15	0.1875	0.209169	0.466667	0.494662				-0.28233	0.28233	0	0
SRSF1_K562	MPI	7	15:75189352-75189560	6:8	0.454545	0.397849	0.659341	0.757576				-0.282261	0.282261	3.24953e-07	1.00225e-05
SRSF1_K562	STK38L	4	12:27461272-27461394	3:5	0.625	0.8125	1	1				-0.28125	0.28125	0.000206515	0.00287134
SRSF1_K562	C2orf3	7	2:75919103-75919226	6:8	0.963636	0.944444	0.695652	0.65				0.281214	0.281214	4.12196e-07	1.24028e-05
SRSF1_K562	CRYZ	8	1:75172787-75172888	7:9	0.468966	0.526163	0.779279	0.777778				-0.280964	0.280964	0	0
SRSF1_K562	FAM53B	6	10:126450869-126451127	5:7	0.179191	0.177419	0.433628	0.484615				-0.280817	0.280817	1.18039e-12	8.16767e-11
SRSF1_K562	METTL10	6	10:126450869-126451127	5:7	0.179191	0.177419	0.433628	0.484615				-0.280817	0.280817	1.18039e-12	8.16767e-11
SRSF1_K562	GMFB	3	14:54948871-54948920	2:4	0.709677	0.728814	1	1				-0.280755	0.280755	2.58006e-10	1.34651e-08
SRSF1_K562	FN1	33	2:216245534-216245803	32:34	0.363636	0.170732	0.631579	0.464286				-0.280748	0.280748	0.00187658	0.0177794
SRSF1_K562	RRBP1	2	20:17660644-17660720	1:3	0.538462	0.387097	0.25	0.115385				0.280087	0.280087	0.00247256	0.022132
SRSF1_K562	DOLPP1	7	9:131848418-131848546	6:8	0.649123	0.660714	0.945946	0.923077				-0.279593	0.279593	7.72296e-06	0.000164759
SRSF1_K562	SMARCD1	5	12:50481146-50481268	4:6	0.637427	0.595238	0.898551	0.890909				-0.278397	0.278397	4.07452e-14	3.32519e-12
SRSF1_K562	NECAB3	11	20:32247303-32247356	10:12	0.631579	0.8125	1	1				-0.277961	0.277961	0.00183658	0.017541
SRSF1_K562	TIMM8B	2	11:111956702-111957034	1:3	0.077748	0.0721154	0.378109	0.327381				-0.277814	0.277814	1.77858e-13	1.33574e-11
SRSF1_K562	C17orf101	2	17:80373274-80373503	1:3	0.666667	0.777778	1	1				-0.277778	0.277778	6.9477e-05	0.00113894
SRSF1_K562	OFD1	12	X:13769368-13769487	11:13	0.602941	0.519231	0.810811	0.866667				-0.277653	0.277653	1.01895e-06	2.78066e-05
SRSF1_K562	CDC7	8	1:91978615-91978864	7:9	0.657143	0.6875	0.938272	0.961538				-0.277584	0.277584	6.38428e-07	1.83436e-05
SRSF1_K562	ZNF384	6	12:6787829-6787876	5:7	0.552632	0.527273	0.872727	0.76087				-0.276846	0.276846	7.54108e-06	0.000161353
SRSF1_K562	TTC31	3	2:74717152-74717254	2:4	0.634146	0.586207	0.939394	0.833333				-0.276187	0.276187	0.000216531	0.00299656
SRSF1_K562	ALAS2	5	X:55050190-55050300	4:6	0.21875	0.211111	0.52518	0.45679				-0.276054	0.276054	5.36946e-10	2.65954e-08
SRSF1_K562	VAV1	7	19:6822430-6822525	6:8	0.571429	0.666667	0.909091	0.88				-0.275498	0.275498	0.000447934	0.00556155
SRSF1_K562	ANKHD1	11	5:139851824-139851880	10:12	0.440945	0.436364	0.732877	0.694611				-0.275089	0.275089	7.36934e-11	4.05204e-09
SRSF1_K562	DCUN1D2	5	13:114117055-114117206	4:6	0.928571	1	0.578947	0.8				0.274812	0.274812	0.00176164	0.0169677
SRSF1_K562	AASDH	2	4:57250236-57250507	1:3	0.674419	0.555556	0.904762	0.872727				-0.273758	0.273758	1.57712e-06	4.03006e-05
SRSF1_K562	PRMT2	2	21:48056351-48056459	1:3	0.0416667	0.0263158	0.309783	0.305699				-0.27375	0.27375	7.10543e-15	6.34168e-13
SRSF1_K562	RNF157	16	17:74151333-74151398	15:17	0.65625	0.675676	0.921569	0.957447				-0.273545	0.273545	5.40048e-06	0.0001205
SRSF1_K562	APITD1	2	1:10490804-10491458	1:3	0.533333	0.461538	0.230769	0.217391				0.273356	0.273356	0.00314944	0.0265567
SRSF1_K562	RP5-1113E3.5	2	1:10490804-10491458	1:3	0.533333	0.461538	0.230769	0.217391				0.273356	0.273356	0.00314944	0.0265567
SRSF1_K562	ZNF394	2	7:99096339-99096465	1:3	0.527778	0.814815	0.941176	0.947368				-0.272976	0.272976	0.000541346	0.00651555
SRSF1_K562	RERE	6	1:8674620-8674745	5:7	1	0.935484	0.714286	0.675676				0.272761	0.272761	7.33264e-06	0.000157341
SRSF1_K562	SIRT6	4	19:4179101-4179283	3:5	0.708333	0.603774	0.857143	1				-0.272518	0.272518	0.00248872	0.0222551
SRSF1_K562	ZFYVE20	2	3:15139626-15139781	1:3	0.545455	0.64	0.833333	0.894737				-0.271308	0.271308	0.00255603	0.0227142
SRSF1_K562	RBM6	33	3:50141681-50141741	32:34	0.475	0.25	0.657143	0.610169				-0.271156	0.271156	0.000620363	0.00725393
SRSF1_K562	RBM5	8	3:50141681-50141741	7:9	0.475	0.25	0.657143	0.610169				-0.271156	0.271156	0.000620363	0.00725393
SRSF1_K562	IFT80	2	3:160166514-160166583	1:3	0.640777	0.820896	0.467742	0.451852				0.271039	0.271039	7.96747e-08	2.8199e-06
SRSF1_K562	TRIM59	2	3:160166514-160166583	1:3	0.640777	0.820896	0.467742	0.451852				0.271039	0.271039	7.96747e-08	2.8199e-06
SRSF1_K562	RP11-431I8.2	2	3:160166514-160166583	1:3	0.640777	0.820896	0.467742	0.451852				0.271039	0.271039	7.96747e-08	2.8199e-06
SRSF1_K562	ZYG11A	5	1:53329653-53329829	4:6	0.625	0.482759	0.833333	0.814815				-0.270195	0.270195	0.000601834	0.00709112
SRSF1_K562	RICTOR	32	5:38949458-38949529	31:33	0.588235	0.538462	0.213333	0.373333				0.270015	0.270015	1.52294e-06	3.92418e-05
SRSF1_K562	ATXN3	4	14:92560090-92560194	3:5	0.807692	0.612903	0.978723	0.981818				-0.269973	0.269973	9.02352e-08	3.16337e-06
SRSF1_K562	APEX2	3	X:55028684-55028864	2:4	0.644231	0.76	0.981818	0.962264				-0.269926	0.269926	4.22956e-10	2.14085e-08
SRSF1_K562	UCHL5	12	1:192989437-192989586	11:13	0.802469	0.833333	0.603175	0.493671				0.269478	0.269478	1.89167e-06	4.75492e-05
SRSF1_K562	TMCO3	11	13:114201615-114201694	10:12	1	1	0.769231	0.692308				0.269231	0.269231	1.38299e-08	5.47124e-07
SRSF1_K562	SLC25A14	2	X:129474081-129474327	1:3	0.472222	0.434783	0.0909091	0.277778				0.269159	0.269159	0.00186928	0.0177417
SRSF1_K562	DNAJC5	6	20:62562462-62562535	5:7	0.292308	0.272727	0.435897	0.666667				-0.268765	0.268765	0.00175697	0.0169416
SRSF1_K562	QARS	23	3:49135425-49135550	22:24	0.698006	0.701068	0.968531	0.967298				-0.268378	0.268378	0	0
SRSF1_K562	PANK4	10	1:2447001-2447156	9:11	0.671875	0.791667	1	1				-0.268229	0.268229	5.83164e-06	0.000128988
SRSF1_K562	SPAG9	7	17:49109042-49109083	6:8	0.628571	0.508929	0.25	0.352601				0.267449	0.267449	3.46609e-10	1.78373e-08
SRSF1_K562	ZNF3	5	7:99674926-99675459	3:6	0.679245	0.714286	0.955556	0.972222				-0.267123	0.267123	1.13728e-06	3.04953e-05
SRSF1_K562	WDTC1	14	1:27630112-27630286	13:15	0.746479	0.719298	1	1				-0.267111	0.267111	6.68511e-11	3.69783e-09
SRSF1_K562	C5orf4	4	5:154214185-154214288	3:5	0.616279	0.513889	0.769231	0.894737				-0.2669	0.2669	4.98209e-05	0.00085782
SRSF1_K562	ACIN1	4	14:23559191-23559310	3:5	0.165939	0.163043	0.408377	0.454023				-0.266709	0.266709	3.33067e-16	3.41856e-14
SRSF1_K562	CCDC77	4	12:518534-518587	3:5	0.777778	0.775	0.431818	0.588235				0.266362	0.266362	0.000237414	0.0032402
SRSF1_K562	POLQ	22	3:121192197-121192334	21:23	0.785714	0.611111	0.928571	1				-0.265873	0.265873	0.00255241	0.0227038
SRSF1_K562	PPM1K	2	4:89199296-89199794	1:3	0.5	0.26087	0.7	0.592593				-0.265862	0.265862	0.00449475	0.0351437
SRSF1_K562	DNAJC8	6	1:28536483-28536577	5:7	0.708054	0.675781	0.966929	0.948509				-0.265802	0.265802	0	0
SRSF1_K562	VHL	2	3:10184229-10184705	1:3	0.210084	0.122449	0.37037	0.493506				-0.265672	0.265672	2.00718e-08	7.72556e-07
SRSF1_K562	EHBP1	20	2:63215066-63215173	19:21	0.967742	0.909091	0.53125	0.814815				0.265384	0.265384	0.000101189	0.00156049
SRSF1_K562	RPAIN	7	17:5331391-5331531	6:9	0.621429	0.643678	0.864198	0.931034				-0.265063	0.265063	1.41147e-08	5.5483e-07
SRSF1_K562	GPR180	4	13:95271404-95271584	3:5	1	0.9375	0.789474	0.619048				0.264489	0.264489	0.000574615	0.00683581
SRSF1_K562	TCERG1	6	5:145847904-145847966	5:7	0.487047	0.43871	0.20098	0.196721				0.264027	0.264027	1.09912e-14	9.53345e-13
SRSF1_K562	DDR1	17	6:30863181-30863291	16:18	0.714286	0.693878	0.451613	0.428571				0.263989	0.263989	0.00152309	0.0151611
SRSF1_K562	IRF3	6	19:50164707-50165585	5:7	0.595238	0.794872	0.918033	1				-0.263961	0.263961	8.91128e-07	2.46092e-05
SRSF1_K562	PHF8	15	X:54020034-54020336	14:16	0.719512	0.666667	0.964286	0.947368				-0.262738	0.262738	3.37896e-08	1.25354e-06
SRSF1_K562	HMMR	5	5:162894707-162894754	4:6	0.542857	0.580153	0.354978	0.242857				0.262587	0.262587	0.000329359	0.00426711
SRSF1_K562	UBAP2L	30	1:154241838-154241888	29:31	0.561404	0.508475	0.35	0.195122				0.262378	0.262378	5.25561e-05	0.000898219
SRSF1_K562	KLHL24	2	3:183354009-183354099	1:3	0.366667	0.458333	0.142857	0.157895				0.262124	0.262124	0.00458792	0.0356871
SRSF1_K562	ARMC10	2	7:102716224-102716328	1:5	0.151515	0.121739	0.411765	0.385417				-0.261964	0.261964	1.22006e-09	5.62108e-08
SRSF1_K562	ALAS1	2	3:52232688-52232864	1:3	0.026087	0.0272727	0.316667	0.259259				-0.261283	0.261283	1.48437e-11	9.02095e-10
SRSF1_K562	EFCAB4B	13	12:3753761-3753806	12:14	0.774194	0.703704	1	1				-0.261051	0.261051	2.35049e-05	0.000444931
SRSF1_K562	ATP5F1	4	1:111996833-111996978	3:5	0.72561	0.711324	0.978941	0.979836				-0.260922	0.260922	0	0
SRSF1_K562	MTRR	3	5:7873486-7873639	2:4	0.653465	0.714286	0.383562	0.462687				0.260751	0.260751	3.56875e-06	8.35649e-05
SRSF1_K562	FIP1L1	9	4:54257597-54257665	8:10	0.77592	0.742972	0.512195	0.485577				0.26056	0.26056	0	0
SRSF1_K562	POMGNT1	9	1:46660516-46660633	8:10	0.555556	0.888889	1	0.965517				-0.260536	0.260536	1.04909e-05	0.000219004
SRSF1_K562	LBR	13	1:225592328-225592408	12:14	0.602062	0.647059	0.877506	0.892473				-0.260429	0.260429	0	0
SRSF1_K562	SS18	11	18:23615795-23615887	10:12	0.0653595	0.068323	0.355372	0.299065				-0.260377	0.260377	2.9976e-15	2.84004e-13
SRSF1_K562	TAPT1	12	4:16172276-16172352	11:13	0.952381	0.913043	0.660377	0.6875				0.258774	0.258774	5.80925e-07	1.69284e-05
SRSF1_K562	AKT2	11	19:40742164-40742292	10:12	0.701754	0.770186	1	0.988889				-0.258474	0.258474	1.51545e-13	1.15694e-11
SRSF1_K562	C12orf51	4	12:112747365-112747473	3:5	0.75	0.733333	1	1				-0.258333	0.258333	0.000176922	0.00251627
SRSF1_K562	AC006116.3	7	19:56886055-56886194	6:8	0.358974	0.333333	0.0909091	0.0851064				0.258146	0.258146	0.000128772	0.00192636
SRSF1_K562	FLVCR1	6	1:213061233-213061343	5:7	0.705882	0.666667	0.948718	0.939394				-0.257781	0.257781	1.99457e-05	0.000385806
SRSF1_K562	WDR53	3	3:196287867-196288362	2:4	0.555556	0.769231	1	0.84				-0.257607	0.257607	0.000122967	0.00185001
SRSF1_K562	ZNF37A	6	10:38403683-38403809	5:7	0.666667	0.818182	1	1				-0.257576	0.257576	4.61798e-06	0.000104555
SRSF1_K562	TRMT61B	5	2:29073938-29074164	4:6	0.709677	0.666667	1	0.891304				-0.25748	0.25748	0.000192054	0.00269825
SRSF1_K562	RFXANK	5	19:19307995-19308060	4:6	0.362069	0.32	0.673077	0.522727				-0.256868	0.256868	7.78187e-09	3.15978e-07
SRSF1_K562	ZNF692	9	1:249149757-249149834	8:10	0.682353	0.773333	0.98	0.988235				-0.256275	0.256275	1.44884e-13	1.11997e-11
SRSF1_K562	DBF4B	7	17:42809546-42809633	6:8	0.0810811	0	0.214286	0.37931				-0.256257	0.256257	6.82707e-05	0.00112415
SRSF1_K562	CTNND1	4	11:57556509-57556627	3:5	0.918367	0.933333	0.780488	0.558824				0.256195	0.256195	3.33366e-05	0.000608591
SRSF1_K562	C3orf23	6	3:44399709-44401288	5:7	0.488372	0.428571	0.839286	0.588235				-0.255289	0.255289	0.000828985	0.00929338
SRSF1_K562	HAGH	7	16:1869116-1869224	6:8	0.574468	0.567568	0.851852	0.8				-0.254908	0.254908	0.000171852	0.00245741
SRSF1_K562	CNOT7	7	8:17089936-17090046	6:8	0.79021	0.7	1	1				-0.254895	0.254895	0	0
SRSF1_K562	SUN1	8	7:882978-883157	7:9	0.736264	0.754098	1	1				-0.254819	0.254819	5.54001e-14	4.46951e-12
SRSF1_K562	TTC8	18	14:89341370-89341453	17:19	1	0.9375	0.636364	0.791667				0.254735	0.254735	0.000525047	0.00637324
SRSF1_K562	PCYT2	8	17:79865080-79865133	7:9	0.136	0.2	0.344	0.5				-0.254	0.254	0.000336491	0.00434126
SRSF1_K562	MPHOSPH8	13	13:20244980-20245243	12:14	0.0714286	0	0.263158	0.315789				-0.253759	0.253759	0.000728847	0.00833258
SRSF1_K562	FBXO44	6	1:11718590-11718685	5:7	0.341463	0.5	0.708333	0.64				-0.253435	0.253435	0.00468054	0.0362267
SRSF1_K562	TRMT2B	10	X:100276957-100277051	9:11	0.704545	0.6875	0.914634	0.984127				-0.253358	0.253358	2.62241e-07	8.28527e-06
SRSF1_K562	MTMR14	18	3:9739395-9739550	17:19	0.638889	0.515152	0.818182	0.842105				-0.253123	0.253123	0.000777294	0.00882095
SRSF1_K562	CLN3	4	16:28502803-28502881	3:5	0.761905	0.622222	0.956522	0.933333				-0.252864	0.252864	0.000394257	0.00496178
SRSF1_K562	ARHGEF25	16	12:58009620-58009800	15:17	0.641026	0.611111	0.919355	0.837838				-0.252528	0.252528	4.39917e-05	0.000772572
SRSF1_K562	FANCL	10	2:58390164-58390209	9:11	0.645833	0.765957	1	0.915493				-0.251851	0.251851	6.47031e-07	1.85045e-05
SRSF1_K562	AGL	15	1:100345479-100345602	14:16	0.869565	0.607143	1	0.98				-0.251646	0.251646	2.08709e-07	6.74109e-06
SRSF1_K562	LETMD1	4	12:51445875-51446029	3:5	0.404908	0.410596	0.664474	0.654321				-0.251645	0.251645	2.17886e-10	1.15342e-08
SRSF1_K562	POP4	3	19:30101316-30101539	2:4	0.695652	0.727273	1	0.925926				-0.251501	0.251501	4.68294e-06	0.000105638
SRSF1_K562	WDR66	9	12:122389386-122389436	8:10	0.714286	0.647059	1	0.863636				-0.251146	0.251146	0.00277229	0.0241481
SRSF1_K562	CTPS2	13	X:16688703-16688797	12:14	0.6875	0.785714	1	0.975309				-0.251047	0.251047	8.85576e-08	3.11046e-06
SRSF1_K562	NFYA	4	6:41048550-41048636	3:5	0.321429	0.25	0.0277778	0.0434783				0.250086	0.250086	0.00022994	0.00315379
SRSF1_K562	ANKRD9	2	14:102974978-102975189	1:3	0.722222	0.736842	1	0.959184				-0.25006	0.25006	1.21895e-05	0.000250781
SRSF1_K562	BAIAP2	2	17:79010663-79010761	1:3	0.297521	0.236559	0.016129	0.0178571				0.250047	0.250047	9.83493e-11	5.35989e-09
SRSF1_K562	FAM193B	7	5:176958954-176959201	6:8	0.481481	0.869565	1	0.851064				-0.250009	0.250009	0.000185107	0.00262459
SRSF1_K562	IRF3	7	19:50163970-50164101	6:8	0.657895	0.84375	1	1				-0.249178	0.249178	1.87706e-07	6.14869e-06
SRSF1_K562	NUMB	11	14:73745989-73746132	10:12	0.512821	0.639344	0.355263	0.3				0.248451	0.248451	2.44463e-05	0.000458989
SRSF1_K562	PPP1R2	4	3:195250490-195250584	3:5	0.686047	0.777778	0.988571	0.972067				-0.248407	0.248407	0	0
SRSF1_K562	RFFL	13	17:33341759-33341782	12:14	0.966667	0.903226	0.684211	0.688889				0.248397	0.248397	4.64461e-05	0.000807236
SRSF1_K562	CCDC88A	8	2:55589444-55589584	7:9	0.753846	0.708333	0.983607	0.974359				-0.247893	0.247893	2.22089e-09	9.93486e-08
SRSF1_K562	USP3	2	15:63821213-63821365	1:3	0.540541	0.309524	0.162162	0.192308				0.247797	0.247797	0.00294293	0.0253122
SRSF1_K562	ATG5	4	6:106756239-106756366	3:5	0.921182	0.940789	0.65	0.717241				0.247365	0.247365	1.11022e-16	1.17881e-14
SRSF1_K562	SCRIB	17	8:144889722-144889784	16:18	0.737226	0.681529	0.96	0.95122				-0.246232	0.246232	4.60965e-13	3.31374e-11
SRSF1_K562	MIIP	2	1:12081702-12081897	1:3	0.717647	0.71134	0.957447	0.960784				-0.244622	0.244622	9.11448e-08	3.18317e-06
SRSF1_K562	GGCT	2	7:30540152-30540297	1:4	0.5	0.440945	0.729107	0.7				-0.244081	0.244081	0	0
SRSF1_K562	AKR1A1	7	1:46034157-46034356	6:8	0.632653	0.621118	0.88746	0.853333				-0.243511	0.243511	0	0
SRSF1_K562	MBNL1	10	3:152164493-152164546	9:11	0.199074	0.218274	0.478528	0.423729				-0.242454	0.242454	6.30951e-12	4.06161e-10
SRSF1_K562	PPP1R12A	15	12:80199946-80200113	14:16	0.624204	0.65625	0.35	0.445946				0.242254	0.242254	1.00483e-07	3.48951e-06
SRSF1_K562	RFC1	17	4:39304680-39304771	16:18	0.849057	0.666667	1	1				-0.242138	0.242138	2.22045e-16	2.29177e-14
SRSF1_K562	SFRS13A	6	1:24296869-24297929	5:7	0.246753	0.236301	0.47138	0.49481				-0.241568	0.241568	0	0
SRSF1_K562	RHOT1	20	17:30536369-30536464	19:21	0.40625	0.352941	0.587629	0.653846				-0.241142	0.241142	4.64884e-06	0.000105102
SRSF1_K562	FAM82B	5	8:87497101-87497190	4:6	0.377358	0.344828	0.617021	0.586777				-0.240806	0.240806	2.47971e-07	7.88513e-06
SRSF1_K562	RACGAP1	6	12:50400217-50400419	5:7	0.7725	0.743017	1	0.996479				-0.240481	0.240481	0	0
SRSF1_K562	MAGI1	15	3:65433697-65433732	14:16	0.392857	0.4	0.047619	0.264706				0.240266	0.240266	0.0013658	0.0138159
SRSF1_K562	DENND4A	20	15:65992882-65993010	19:21	0.0444444	0	0.266667	0.258065				-0.240143	0.240143	1.65933e-05	0.000332136
SRSF1_K562	SUV420H2	3	19:55853583-55853748	2:4	0.139785	0.113402	0.387097	0.346154				-0.240032	0.240032	8.41393e-05	0.00133661
SRSF1_K562	SSX2IP	4	1:85146021-85146070	3:5	0.0571429	0.0909091	0.434783	0.192308				-0.239519	0.239519	0.00147371	0.0147172
SRSF1_K562	RHOT2	9	16:720675-720773	8:10	0.694915	0.589286	0.813187	0.95				-0.239493	0.239493	2.25205e-06	5.54015e-05
SRSF1_K562	C3orf17	2	3:112736295-112736449	1:3	0.911765	0.925926	0.648649	0.710526				0.239258	0.239258	0.000449783	0.00558074
SRSF1_K562	MAPK8	3	10:49533940-49534008	2:4	0.673077	0.52381	0.307692	0.410714				0.23924	0.23924	0.000680965	0.00785811
SRSF1_K562	GTPBP2	11	6:43590370-43590541	10:12	0.641026	0.739726	0.962963	0.895833				-0.239022	0.239022	2.7391e-09	1.20202e-07
SRSF1_K562	FIP1L1	2	4:54245240-54245284	1:3	0.236948	0.168889	0.493333	0.390411				-0.238954	0.238954	1.73472e-12	1.16967e-10
SRSF1_K562	TMEM108	5	3:133098596-133100005	4:7	0.8	0.722222	1	1				-0.238889	0.238889	0.00135983	0.0137962
SRSF1_K562	NUMA1	20	11:71723447-71723488	19:21	0.762821	0.788462	0.55102	0.523179				0.238541	0.238541	3.44223e-10	1.7764e-08
SRSF1_K562	ULK3	14	15:75130493-75130533	13:15	0.857143	0.666667	1	1				-0.238095	0.238095	3.56004e-05	0.000643559
SRSF1_K562	ZDHHC7	4	16:85022369-85022479	3:5	0.494048	0.548148	0.256098	0.3125				0.236799	0.236799	1.24132e-06	3.26686e-05
SRSF1_K562	SPAG5	8	17:26912552-26912671	7:9	0.745763	0.732283	0.981132	0.970085				-0.236586	0.236586	0	0
SRSF1_K562	PIKFYVE	23	2:209194566-209194637	22:24	0.8	0.658537	0.931034	1				-0.236249	0.236249	7.19902e-05	0.00117286
SRSF1_K562	PIWIL4	5	11:94308165-94308296	4:6	0.777778	0.75	1	1				-0.236111	0.236111	0.000519987	0.0063244
SRSF1_K562	C19orf2	3	19:30462100-30462134	2:4	0.710526	0.716216	0.515152	0.439394				0.236099	0.236099	4.35061e-05	0.000764772
SRSF1_K562	ST7L	5	1:113159435-113159517	3:6	0.6625	0.75	0.917808	0.963636				-0.234472	0.234472	3.04574e-07	9.47306e-06
SRSF1_K562	PUS7	3	7:105146636-105146720	2:4	0.785714	0.745763	1	1				-0.234262	0.234262	1.11022e-16	1.17881e-14
SRSF1_K562	LSM14A	10	19:34717313-34717369	9:11	0.242236	0.1875	0.469178	0.428161				-0.233801	0.233801	0	0
SRSF1_K562	FNIP1	45	5:130775839-130775921	44:46	0.148148	0.318182	0	0				0.233165	0.233165	3.18011e-06	7.54204e-05
SRSF1_K562	RAPGEF6	28	5:130775839-130775921	27:29	0.148148	0.318182	0	0				0.233165	0.233165	3.18011e-06	7.54204e-05
SRSF1_K562	FXR1	18	3:180693101-180693192	17:19	0.712895	0.75	0.501155	0.495798				0.232971	0.232971	0	0
SRSF1_K562	IL17RC	4	3:9960019-9960093	3:5	0.625	0.909091	1	1				-0.232955	0.232955	0.000980752	0.0106585
SRSF1_K562	CCBL1	7	9:131600497-131600646	6:8	0.671233	0.818182	1	0.954545				-0.232565	0.232565	1.238e-07	4.22775e-06
SRSF1_K562	TIMM9	3	14:58890726-58890813	2:4	0.698529	0.654545	0.919598	0.897872				-0.232198	0.232198	0	0
SRSF1_K562	CENPJ	11	13:25463454-25463538	10:12	1	1	0.785714	0.75				0.232143	0.232143	1.06078e-06	2.88204e-05
SRSF1_K562	CHD6	15	20:40116305-40116448	14:16	0.846154	0.689655	1	1				-0.232095	0.232095	3.48198e-08	1.28659e-06
SRSF1_K562	GAPVD1	16	9:128097451-128097531	15:17	0.478022	0.565789	0.292683	0.287582				0.231773	0.231773	6.46409e-09	2.67767e-07
SRSF1_K562	PRPF4B	17	6:4062791-4062867	16:18	0.991935	0.966292	0.761905	0.732877				0.231723	0.231723	2.9976e-15	2.84004e-13
SRSF1_K562	CRELD1	5	3:9979699-9979790	4:6	0.578947	0.8	1	0.842105				-0.231579	0.231579	0.00159862	0.0157098
SRSF1_K562	ELK1	2	X:47509320-47509425	1:3	0.893805	0.848214	0.675676	0.606061				0.230142	0.230142	5.99177e-05	0.0010027
SRSF1_K562	CD3D	3	11:118210490-118210621	2:4	0.7	0.727273	0.957447	0.93				-0.230087	0.230087	1.52886e-05	0.000308023
SRSF1_K562	MAGOH	3	1:53699214-53699324	2:4	0.475561	0.501558	0.736434	0.700288				-0.229802	0.229802	0	0
SRSF1_K562	CPSF6	6	12:69651815-69651925	5:7	0.025974	0.0113636	0.27027	0.226667				-0.2298	0.2298	1.59584e-09	7.24399e-08
SRSF1_K562	C16orf35	6	16:167300-167374	5:7	0.703704	0.847826	0.551724	0.54023				0.229788	0.229788	9.14697e-05	0.00143334
SRSF1_K562	DDX52	15	17:35980918-35980993	14:16	0.738095	0.794521	0.992126	1				-0.229755	0.229755	2.22045e-16	2.29177e-14
SRSF1_K562	NELF	5	9:140349691-140349783	4:7	0.670588	0.584416	0.895833	0.818182				-0.229506	0.229506	4.19389e-05	0.000740747
SRSF1_K562	TRUB1	2	10:116702404-116702502	1:3	0.71875	0.785714	0.962963	1				-0.229249	0.229249	7.98037e-05	0.00127873
SRSF1_K562	MAP3K3	16	17:61769602-61769779	15:17	0.888889	0.608696	1	0.954545				-0.22848	0.22848	9.88035e-05	0.00153137
SRSF1_K562	ERI2	2	16:20817037-20817267	1:3	0.355263	0.238806	0.469388	0.581395				-0.228357	0.228357	0.00060987	0.00717666
SRSF1_K562	ZCCHC10	2	5:132358533-132358598	1:3	0.7125	0.686567	0.451613	0.490909				0.228273	0.228273	3.55628e-07	1.08599e-05
SRSF1_K562	TUBGCP4	17	15:43695881-43695997	16:18	0.817204	0.7	0.985507	0.988235				-0.228269	0.228269	7.80276e-12	4.9709e-10
SRSF1_K562	HPS5	16	11:18312989-18313566	15:17	0.794872	0.717391	1	0.96875				-0.228243	0.228243	4.20766e-07	1.26196e-05
SRSF1_K562	RFFL	11	17:33344542-33344625	10:12	0.714286	0.8	0.970588	1				-0.228151	0.228151	0.000108285	0.00165472
SRSF1_K562	ISOC2	3	19:55967003-55967212	2:4	0.378788	0.409449	0.636364	0.606557				-0.227342	0.227342	4.9619e-05	0.00085594
SRSF1_K562	ATXN2L	12	16:28843817-28843888	11:13	0.748359	0.731092	0.973742	0.960159				-0.227225	0.227225	0	0
SRSF1_K562	TNIP1	18	5:150413041-150413360	17:19	0.819277	0.704082	1	0.977273				-0.226957	0.226957	2.89202e-12	1.90822e-10
SRSF1_K562	VPS13C	67	15:62198068-62198168	66:68	0.193548	0.333333	0.0731707	0				0.226855	0.226855	5.2736e-05	0.00090046
SRSF1_K562	C21orf57	4	21:47711248-47711376	3:5	0.88	0.884615	0.761905	0.55				0.226355	0.226355	0.0056234	0.0417741
SRSF1_K562	ZSWIM7	5	17:15890114-15890206	4:6	0	0	0.235294	0.217391				-0.226343	0.226343	0.000890869	0.00983202
SRSF1_K562	AKAP9	20	7:91671360-91671500	19:21	0.877778	0.792453	0.53012	0.6875				0.226305	0.226305	3.05677e-06	7.29636e-05
SRSF1_K562	GIGYF2	2	2:233565295-233565364	1:3	0.771429	0.647059	0.403509	0.5625				0.226239	0.226239	0.00285165	0.0246188
SRSF1_K562	PLTP	6	20:44538155-44538310	5:7	0.647059	0.8	0.938462	0.958333				-0.224868	0.224868	4.0863e-05	0.000723126
SRSF1_K562	IKBKB	16	8:42177103-42177164	15:17	0.608696	0.913043	1	0.971429				-0.224845	0.224845	0.000132912	0.00197392
SRSF1_K562	SLC43A1	12	11:57258697-57258835	11:13	0.862069	0.689655	1	1				-0.224138	0.224138	9.89839e-09	3.98415e-07
SRSF1_K562	ZDHHC13	2	11:19164525-19164670	1:3	0.694444	0.791667	1	0.933333				-0.223611	0.223611	0.0061117	0.0446299
SRSF1_K562	TJP1	24	15:30011981-30012220	23:25	0.36	0.282609	0.0806452	0.115385				0.223289	0.223289	1.41135e-05	0.000286535
SRSF1_K562	ZNF195	2	11:3398847-3399130	1:3	0.0588235	0.0638298	0.269231	0.3				-0.223289	0.223289	0.000425023	0.00529131
SRSF1_K562	RECQL4	17	8:145737775-145737944	16:18	0.824561	0.729167	1	1				-0.223136	0.223136	3.28123e-05	0.000600205
SRSF1_K562	REV1	4	2:100067807-100067963	3:5	0.244898	0.333333	0.0731707	0.0588235				0.223119	0.223119	8.79493e-05	0.00138877
SRSF1_K562	ADPGK	6	15:73048592-73048788	5:8	0.45679	0.492063	0.695652	0.69697				-0.221884	0.221884	0.000256422	0.00345544
SRSF1_K562	C4orf21	7	4:113538596-113540846	6:8	0.842105	0.714286	1	1				-0.221805	0.221805	1.20494e-05	0.000248722
SRSF1_K562	GPCPD1	5	20:5566840-5566915	4:6	0.948052	0.952381	0.857143	0.6				0.221645	0.221645	5.8503e-06	0.000129133
SRSF1_K562	OTUD3	3	1:20220861-20220973	2:4	0.941176	0.931034	0.694444	0.734694				0.221536	0.221536	0.000337882	0.00435311
SRSF1_K562	XRN1	13	3:142135982-142136071	12:14	0.787879	0.769231	1	1				-0.221445	0.221445	3.322e-06	7.82832e-05
SRSF1_K562	USP8	13	15:50776472-50776558	12:14	0.0638298	0.0481928	0.304348	0.25				-0.221163	0.221163	1.07124e-09	5.01041e-08
SRSF1_K562	ZNF639	3	3:179042830-179043110	1:4	0.740741	0.703704	0.939394	0.947368				-0.221159	0.221159	0.000613709	0.00720921
SRSF1_K562	PQBP1	6	X:48759496-48759794	5:7	0.738095	0.764706	0.974138	0.970874				-0.221105	0.221105	0	0
SRSF1_K562	AGXT2L2	15	5:177639974-177640104	14:16	0.785714	0.6	0.869565	0.958333				-0.221092	0.221092	0.000798738	0.00901309
SRSF1_K562	PDE3B	3	11:14807983-14808231	2:4	0.625	0.933333	1	1				-0.220833	0.220833	0.000389831	0.00490942
SRSF1_K562	MATR3	11	5:138651386-138651427	10:12	0.681063	0.670157	0.911111	0.878877				-0.219384	0.219384	0	0
SRSF1_K562	ECHDC1	5	6:127637595-127637647	4:6	0.588571	0.597403	0.393064	0.356021				0.218445	0.218445	7.55026e-09	3.07927e-07
SRSF1_K562	UEVLD	14	11:18555877-18556000	13:15	0.962963	0.869565	0.681818	0.714286				0.218212	0.218212	0.006476	0.0465569
SRSF1_K562	HIRIP3	4	16:30005227-30006164	3:5	0.58209	0.693878	0.848485	0.862745				-0.217631	0.217631	0.000132665	0.00197392
SRSF1_K562	ATR	28	3:142226773-142226951	27:29	0.75	0.815789	1	1				-0.217105	0.217105	4.01816e-06	9.2609e-05
SRSF1_K562	SLC25A21	7	14:37153949-37154130	6:8	0.791667	0.75	1	0.975				-0.216667	0.216667	1.36019e-08	5.3926e-07
SRSF1_K562	LARS2	9	3:45515735-45515842	8:10	0.847458	0.693878	0.974359	1				-0.216512	0.216512	2.84261e-06	6.83819e-05
SRSF1_K562	RAPGEF1	5	9:134525516-134525629	4:6	0.180851	0.218182	0.491228	0.34				-0.216098	0.216098	9.24954e-05	0.00144695
SRSF1_K562	PLCXD1	2	X:198149-198351	1:3	0.69697	0.638889	0.853659	0.914286				-0.216043	0.216043	0.00186521	0.0177417
SRSF1_K562	MKI67	7	10:129913192-129914271	6:8	0.189655	0.208333	0.438356	0.390244				-0.215306	0.215306	9.99906e-06	0.000209685
SRSF1_K562	LMAN2L	5	2:97399256-97399338	4:7	0.833333	0.611111	1	0.875				-0.215278	0.215278	0.00305605	0.0260427
SRSF1_K562	SEC23IP	2	10:121657939-121658471	1:3	0.75	0.821429	1	1				-0.214286	0.214286	1.16717e-05	0.000241203
SRSF1_K562	SKA2	3	17:57196680-57196856	2:4	0.833333	0.818681	0.598566	0.625				0.214224	0.214224	1.2601e-13	9.86458e-12
SRSF1_K562	TMC6	14	17:76116734-76116913	13:15	0.67907	0.6625	0.85654	0.913043				-0.214007	0.214007	3.4972e-14	2.88441e-12
SRSF1_K562	ARHGAP25	7	2:69014972-69015088	6:8	0.769231	0.666667	1	0.862069				-0.213086	0.213086	0.00604881	0.0442406
SRSF1_K562	EAF2	6	3:121573534-121573670	5:7	0.872727	0.923077	0.821429	0.548387				0.212994	0.212994	0.00136143	0.0138013
SRSF1_K562	SIRT5	10	6:13599264-13599387	9:11	0.777778	0.619048	0.852941	0.969697				-0.212906	0.212906	0.00257922	0.0228543
SRSF1_K562	MYST3	2	8:41907094-41907225	1:3	0.818182	0.806452	0.636364	0.5625				0.212885	0.212885	0.00596295	0.0437686
SRSF1_K562	SETD4	5	21:37429682-37429775	4:6	0.123457	0.0925926	0.361702	0.28				-0.212826	0.212826	4.46312e-05	0.000780834
SRSF1_K562	SNX25	16	4:186272599-186272763	15:17	1	1	0.761905	0.8125				0.212798	0.212798	3.49394e-05	0.000632962
SRSF1_K562	KDM6A	14	X:44919854-44920009	13:15	0.62963	0.702703	0.485714	0.421053				0.212783	0.212783	0.0058047	0.0429074
SRSF1_K562	TMEM173	7	5:138856914-138857100	6:8	0.739726	0.775862	0.956522	0.984615				-0.212775	0.212775	1.70382e-07	5.64125e-06
SRSF1_K562	KIAA1715	4	2:176858862-176859008	3:5	0.0416667	0.0483871	0.28125	0.233766				-0.212481	0.212481	2.7842e-07	8.71831e-06
SRSF1_K562	TATDN1	3	8:125534392-125534441	2:4	0.672131	0.714286	0.878661	0.932203				-0.212224	0.212224	1.28175e-12	8.80311e-11
SRSF1_K562	DMPK	9	19:46280585-46280848	8:10	0.764706	0.714286	0.903226	1				-0.212117	0.212117	0.00238855	0.0215384
SRSF1_K562	IL4I1	2	19:50430951-50431105	1:3	0.150215	0.15625	0.360248	0.369231				-0.211507	0.211507	1.31375e-10	7.05568e-09
SRSF1_K562	NUP62	2	19:50430951-50431105	1:3	0.150215	0.15625	0.360248	0.369231				-0.211507	0.211507	1.31375e-10	7.05568e-09
SRSF1_K562	SENP5	2	3:196612022-196613565	1:3	0.794118	0.72973	1	0.945946				-0.211049	0.211049	0.000144717	0.00212334
SRSF1_K562	GRAMD1A	10	19:35504160-35504272	9:11	0.826087	0.566667	0.925	0.888889				-0.210568	0.210568	0.000538031	0.00650106
SRSF1_K562	KDM4B	7	19:5071021-5071070	6:8	1	1	0.684211	0.894737				0.210526	0.210526	7.96844e-05	0.00127792
SRSF1_K562	CHCHD7	2	8:57125321-57125468	1:3	0.0660377	0.0733945	0.269091	0.290816				-0.210238	0.210238	3.28783e-06	7.7676e-05
SRSF1_K562	LRRC68	11	19:45646779-45646891	10:12	0.866667	0.714286	1	1				-0.209524	0.209524	0.00191403	0.0180514
SRSF1_K562	PCNT	34	21:47845745-47845885	33:35	0.609756	0.675	0.814815	0.888889				-0.209474	0.209474	0.00671222	0.0479352
SRSF1_K562	ENOSF1	7	18:691204-693175	6:8	0.580645	0.892857	0.891892	1				-0.209195	0.209195	0.000423344	0.00527752
SRSF1_K562	ATE1	9	10:123658356-123658484	8:10	0.333333	0.321429	0.09375	0.142857				0.209077	0.209077	0.00476133	0.0367442
SRSF1_K562	TC2N	11	14:92258711-92258902	10:12	0.7	0.782609	0.925926	0.974359				-0.208838	0.208838	0.00176029	0.0169647
SRSF1_K562	ACACA	37	17:35567381-35567404	36:38	0.892473	0.9125	0.720721	0.666667				0.208793	0.208793	1.52944e-07	5.13754e-06
SRSF1_K562	CNPY3	4	6:42903150-42903211	3:5	0.485714	0.547619	0.31405	0.301887				0.208698	0.208698	0.000928122	0.0102005
SRSF1_K562	TIA1	5	2:70456191-70456223	4:6	0.666667	0.669291	0.519084	0.4				0.208437	0.208437	1.18786e-06	3.16676e-05
SRSF1_K562	TERF1	8	8:73942571-73942630	7:9	0.416667	0.440678	0.183333	0.257143				0.208434	0.208434	0.000282684	0.00375996
SRSF1_K562	ALKBH2	3	12:109527814-109528012	2:4	0.673077	0.717391	0.930556	0.875				-0.207544	0.207544	5.23037e-05	0.000894733
SRSF1_K562	BCLAF1	11	6:136590279-136590441	10:12	0.0309278	0.0677291	0.241546	0.271845				-0.207367	0.207367	0	0
SRSF1_K562	TP53BP1	21	15:43713223-43713372	20:22	0.826923	0.759259	1	1				-0.206909	0.206909	3.62442e-07	1.10315e-05
SRSF1_K562	UBE2Q2	4	15:76152219-76152323	3:5	0.99	0.956522	0.739726	0.793103				0.206846	0.206846	4.91783e-10	2.45559e-08
SRSF1_K562	SNAP47	6	1:227935393-227935934	5:7	0.558559	0.626374	0.857143	0.741379				-0.206795	0.206795	0.000224089	0.00308038
SRSF1_K562	TMPO	6	12:98938008-98938127	5:7	0.728972	0.765217	0.954424	0.953052				-0.206643	0.206643	0	0
SRSF1_K562	LETMD1	6	12:51449618-51449804	5:7	0.789474	0.742424	0.986014	0.958904				-0.20651	0.20651	1.04361e-14	9.09466e-13
SRSF1_K562	CKLF	3	16:66597025-66597120	2:4	0.963415	0.972789	0.78626	0.737179				0.206382	0.206382	3.9968e-15	3.69205e-13
SRSF1_K562	AIP	3	11:67256738-67256926	2:4	0.758242	0.777778	1	0.947368				-0.205674	0.205674	5.61628e-06	0.000124712
SRSF1_K562	CCDC112	9	5:114605400-114605495	8:10	0.795455	0.826087	0.657143	0.553571				0.205414	0.205414	0.00225951	0.0205841
SRSF1_K562	ZMIZ1	28	10:81070681-81070941	27:29	0.741935	0.564103	0.954545	0.761905				-0.205206	0.205206	0.00685677	0.0487243
SRSF1_K562	VWDE	9	7:12414636-12414853	8:10	0.779412	0.8	1	0.989744				-0.205166	0.205166	2.77556e-15	2.67075e-13
SRSF1_K562	ADD3	16	10:111892063-111892158	15:17	0.0384615	0.186047	0.307692	0.326531				-0.204857	0.204857	4.59344e-05	0.000799095
SRSF1_K562	TMEM126B	3	11:85342189-85342360	2:4	0.823529	0.655172	0.969697	0.917808				-0.204402	0.204402	6.64859e-05	0.0010977
SRSF1_K562	MYNN	2	3:169491819-169491885	1:3	0.432927	0.422535	0.254386	0.192661				0.204208	0.204208	1.23901e-06	3.26544e-05
SRSF1_K562	PPP4R1	13	18:9562920-9563044	12:14	0.137931	0.258993	0.442308	0.362745				-0.204064	0.204064	6.2873e-07	1.81214e-05
SRSF1_K562	TRIM6-TRIM34	3	11:5624476-5624965	2:4	0.810811	0.78125	1	1				-0.20397	0.20397	0.000187957	0.00265076
SRSF1_K562	TRIM34	3	11:5624476-5624965	2:4	0.810811	0.78125	1	1				-0.20397	0.20397	0.000187957	0.00265076
SRSF1_K562	TRIM6	3	11:5624476-5624965	2:4	0.810811	0.78125	1	1				-0.20397	0.20397	0.000187957	0.00265076
SRSF1_K562	CDIPT	2	16:29873907-29874041	1:3	0.723077	0.869565	1	1				-0.203679	0.203679	1.56027e-06	3.99253e-05
SRSF1_K562	GOLGA4	28	3:37402734-37403712	27:30	0.293103	0.347458	0.146154	0.089172				0.202618	0.202618	3.38146e-09	1.46649e-07
SRSF1_K562	ZNF146	2	19:36709024-36709097	1:3	0.567766	0.554585	0.76129	0.765273				-0.202106	0.202106	8.45768e-13	5.89644e-11
SRSF1_K562	FBXL12	3	19:9923907-9923950	2:4	0.466667	0.470588	0.236842	0.296296				0.202058	0.202058	0.00591649	0.0434621
SRSF1_K562	TFR2	12	7:100226876-100226995	11:13	0.80303	0.793103	1	1				-0.201933	0.201933	4.21885e-15	3.87777e-13
SRSF1_K562	OFD1	21	X:13781864-13781974	20:22	0.230769	0.261538	0.493671	0.401961				-0.201662	0.201662	0.000339805	0.0043718
SRSF1_K562	PHF21A	3	11:46112006-46112117	2:4	0.584615	0.297297	0.228916	0.25				0.201499	0.201499	0.000210596	0.00291879
SRSF1_K562	DNMT3A	25	2:25459805-25459874	24:26	0.666667	0.833333	0.977273	0.925				-0.201136	0.201136	0.00204139	0.0189903
SRSF1_K562	DDX31	9	9:135533468-135533745	8:10	0.0769231	0.0857143	0.194444	0.37037				-0.201089	0.201089	0.00200165	0.0186865
SRSF1_K562	RAI14	15	5:34813679-34813765	14:16	0.721649	0.772152	0.46875	0.623656				0.200698	0.200698	7.64949e-05	0.00123212
SRSF1_K562	ARHGAP12	8	10:32128565-32128639	7:9	0.95	1	0.933333	0.615385				0.200641	0.200641	0.0011039	0.0116807
SRSF1_K562	COMMD9	5	11:36297687-36297790	4:6	0.785714	0.813559	1	1				-0.200363	0.200363	6.98811e-09	2.86901e-07
SRSF1_K562	BOLA3	3	2:74369399-74369487	2:4	0.864048	0.849802	0.65	0.663194				0.200328	0.200328	0	0
SRSF1_K562	XRN2	14	20:21314716-21314823	13:15	0.836538	0.763158	1	1				-0.200152	0.200152	0	0
SRSF1_K562	MFF	10	2:228217230-228217289	9:11	0.950617	0.95	0.764706	0.735849				0.200031	0.200031	7.20411e-07	2.03822e-05
SRSF1_K562	CCDC138	14	2:109489907-109490045	13:15	1	0.916667	0.863636	0.653061				0.199985	0.199985	3.09454e-05	0.000570575
SRSF1_K562	RTTN	49	18:67673617-67673720	48:50	0.714286	0.846154	1	0.96				-0.19978	0.19978	0.00497016	0.0380223
SRSF1_K562	USP4	7	3:49348947-49350046	6:8	0.97561	0.939394	0.770833	0.744681				0.199745	0.199745	0.000104134	0.00160056
SRSF1_K562	ZFYVE16	9	5:79743845-79744223	8:10	0.727273	0.842105	1	0.96875				-0.199686	0.199686	0.000199814	0.00278818
SRSF1_K562	SCMH1	7	1:41618271-41618413	6:8	0.923077	0.970588	0.694444	0.8				0.19961	0.19961	0.000545864	0.00655712
SRSF1_K562	KLHL18	2	3:47328710-47328948	1:4	0.397727	0.428571	0.177778	0.25				0.19926	0.19926	0.00177259	0.0170476
SRSF1_K562	CCHCR1	17	6:31111039-31111190	16:18	0.708333	0.870968	0.97619	1				-0.198445	0.198445	0.00701237	0.0493318
SRSF1_K562	SLC35A3	5	1:100464817-100464971	4:6	0.93617	1	0.666667	0.872727				0.198388	0.198388	0.000109827	0.00167403
SRSF1_K562	MRRF	2	9:125027741-125028059	1:3	0.226415	0.245902	0.432432	0.436364				-0.19824	0.19824	0.000668346	0.00774604
SRSF1_K562	APLP2	15	11:130007151-130007186	14:16	0.419223	0.412776	0.208571	0.228346				0.197541	0.197541	0	0
SRSF1_K562	PUF60	7	8:144902836-144902886	6:8	0.423841	0.294964	0.557692	0.555556				-0.197221	0.197221	0.000842574	0.0094001
SRSF1_K562	PNKD	8	2:219206257-219206349	7:9	0.84	0.766667	1	1				-0.196667	0.196667	0.000566029	0.0067467
SRSF1_K562	IQGAP3	29	1:156504293-156504525	28:30	0.722222	0.884615	1	1				-0.196581	0.196581	3.59967e-05	0.000649452
SRSF1_K562	GATA1	2	X:48649498-48649736	1:3	0.583924	0.566779	0.781938	0.761671				-0.196453	0.196453	1.69137e-07	5.61006e-06
SRSF1_K562	GGA2	11	16:23491966-23492091	10:12	0.793103	0.776398	0.992248	0.970149				-0.196448	0.196448	5.88418e-15	5.32893e-13
SRSF1_K562	FBXL6	4	8:145581099-145581162	3:5	0.857143	0.75	1	1				-0.196429	0.196429	0.00269655	0.0236444
SRSF1_K562	TCF25	9	16:89960136-89960266	8:10	0.712121	0.744681	0.964286	0.882353				-0.194918	0.194918	1.47137e-05	0.000298065
SRSF1_K562	ZKSCAN3	6	6:28331469-28331592	5:7	0.853659	0.638889	1	0.882353				-0.194903	0.194903	0.00263816	0.0232708
SRSF1_K562	LARP4	2	12:50806188-50806236	1:3	0.34507	0.323077	0.165468	0.113043				0.194818	0.194818	2.70734e-07	8.50647e-06
SRSF1_K562	TSPYL2	4	X:53114136-53114281	3:5	0.78125	0.785714	1	0.954545				-0.193791	0.193791	0.000366993	0.00467278
SRSF1_K562	HELLS	4	10:96316936-96316979	3:5	0.21875	0.269231	0.0322581	0.0689655				0.193379	0.193379	0.0010155	0.0109524
SRSF1_K562	FANCA	31	16:89824985-89825113	30:32	0.642857	0.672414	0.886792	0.814815				-0.193168	0.193168	0.000711764	0.00816253
SRSF1_K562	CDK5RAP2	20	9:123222850-123223025	19:21	0.833333	0.769912	0.681034	0.536585				0.192812	0.192812	3.50302e-06	8.22342e-05
SRSF1_K562	PPP1R12C	8	19:55607630-55607703	7:9	0.742857	0.871795	1	1				-0.192674	0.192674	6.57269e-06	0.000143196
SRSF1_K562	CCDC55	3	17:28445098-28445191	2:6	0.931507	0.979592	0.826087	0.7				0.192506	0.192506	0.000279504	0.00372303
SRSF1_K562	CD55	6	1:207504453-207504641	5:7	0.769531	0.809091	0.986376	0.976812				-0.192283	0.192283	0	0
SRSF1_K562	ATG4C	10	1:63307099-63307218	9:11	0.735294	0.716667	0.908046	0.927835				-0.19196	0.19196	4.58706e-06	0.000103983
SRSF1_K562	C16orf73	8	16:1907736-1907931	7:9	0.793333	0.729927	0.951872	0.955157				-0.191884	0.191884	4.68514e-14	3.7964e-12
SRSF1_K562	GAK	26	4:862327-863320	21:27	0.768293	0.792683	1	0.944444				-0.191734	0.191734	1.50689e-05	0.000304594
SRSF1_K562	GDA	6	9:74812378-74812475	4:7	0.186047	0.352941	0.0704225	0.0851064				0.191729	0.191729	0.000500931	0.00613706
SRSF1_K562	PLRG1	14	4:155458438-155458631	13:15	0.798165	0.790576	0.981132	0.991031				-0.191711	0.191711	0	0
SRSF1_K562	CLCN3	16	4:170638943-170639018	15:17	0.284672	0.304348	0.125	0.0808824				0.191569	0.191569	0.0012191	0.0126462
SRSF1_K562	OSBP2	18	22:31289804-31289988	17:19	0.740741	0.804348	0.980392	0.947368				-0.191336	0.191336	4.55315e-05	0.000793579
SRSF1_K562	METTL3	9	14:21967450-21967515	8:10	0.679245	0.8	0.955224	0.90625				-0.191114	0.191114	4.754e-05	0.000824696
SRSF1_K562	VPS37C	2	11:60906209-60906307	1:3	0.774194	0.84375	1	1				-0.191028	0.191028	8.13777e-05	0.00129832
SRSF1_K562	SEC16A	31	9:139339504-139339563	30:32	0.787234	0.761905	0.931034	1				-0.190948	0.190948	0.0017514	0.0168987
SRSF1_K562	DCAF17	15	2:172336548-172336703	14:16	0.8	0.818182	1	1				-0.190909	0.190909	1.84698e-07	6.0609e-06
SRSF1_K562	OPA1	7	3:193343881-193343991	6:8	0.622222	0.664894	0.442708	0.463415				0.190496	0.190496	5.3214e-08	1.90899e-06
SRSF1_K562	FAM120B	8	6:170667314-170667508	7:9	0.826087	0.695652	1	0.902439				-0.19035	0.19035	0.00277412	0.0241526
SRSF1_K562	UBTF	10	17:42289712-42289822	9:11	0.0849057	0.127778	0.251908	0.34127				-0.190247	0.190247	1.68317e-09	7.62172e-08
SRSF1_K562	C14orf104	2	14:50094730-50094873	1:3	0.780822	0.7	0.571429	0.529412				0.189991	0.189991	0.00183718	0.017541
SRSF1_K562	VPS39	3	15:42484264-42484297	2:4	0.29661	0.0957447	0.0133333	0				0.189511	0.189511	5.26416e-10	2.62144e-08
SRSF1_K562	BRD8	9	5:137504159-137504377	8:10	0.725275	0.776119	0.957265	0.923077				-0.189474	0.189474	6.53284e-10	3.19297e-08
SRSF1_K562	RRP1	11	21:45220743-45220762	10:12	0.77381	0.848101	1	1				-0.189045	0.189045	5.33462e-13	3.80529e-11
SRSF1_K562	FLVCR1	2	1:213037067-213037211	1:3	0.9375	0.911111	0.571429	0.9				0.188591	0.188591	0.000548325	0.00657385
SRSF1_K562	YTHDC2	4	5:112860678-112860874	2:5	0.8	0.722222	0.914894	0.983607				-0.188139	0.188139	8.98462e-05	0.00141457
SRSF1_K562	KIAA0196	2	8:126095955-126096264	1:3	0.901961	0.645833	0.923077	1				-0.187641	0.187641	0.000136759	0.00202615
SRSF1_K562	TAF15	4	17:34147168-34147252	3:5	0.792079	0.81962	0.989097	0.997114				-0.187256	0.187256	0	0
SRSF1_K562	TTF2	12	1:117626640-117626790	10:13	0.870968	0.6875	0.978261	0.954545				-0.187169	0.187169	0.000516058	0.00628075
SRSF1_K562	TARS2	15	1:150477108-150477209	14:16	0.921053	0.896552	0.71875	0.724638				0.187108	0.187108	8.81625e-05	0.00139095
SRSF1_K562	DENND1A	18	9:126212972-126213028	17:19	0.732394	0.836735	1	0.942308				-0.186589	0.186589	2.21764e-05	0.00042545
SRSF1_K562	ARHGEF12	6	11:120280103-120280159	5:7	0.58871	0.686567	0.416667	0.486111				0.18625	0.18625	0.00126208	0.0129682
SRSF1_K562	TTL	2	2:113243494-113243572	1:3	0.943396	1	0.803922	0.767442				0.186016	0.186016	0.000161024	0.00231872
SRSF1_K562	AD000671.3	8	19:36214634-36214908	7:9	0.869565	0.758621	1	1				-0.185907	0.185907	0.00189072	0.0178858
SRSF1_K562	BPTF	28	17:65959449-65959622	27:29	0.584906	0.678571	0.777778	0.857143				-0.185722	0.185722	0.00385726	0.0312146
SRSF1_K562	TARBP1	26	1:234536599-234536694	25:27	0.111111	0.16129	0.355932	0.287879				-0.185705	0.185705	0.001739	0.0168122
SRSF1_K562	UQCRB	5	8:97243454-97243743	4:6	0.214013	0.212536	0.0279898	0.0275705				0.185494	0.185494	0	0
SRSF1_K562	GSTM3	3	1:110282455-110282530	2:4	0.807692	0.714286	1	0.892857				-0.18544	0.18544	0.00501522	0.0382561
SRSF1_K562	GOLGA4	19	3:37365079-37369316	18:20	0.776471	0.764151	0.958904	0.951807				-0.185045	0.185045	2.69521e-11	1.5858e-09
SRSF1_K562	RNASEN	6	5:31521230-31521322	5:7	0.925926	0.842857	0.716049	0.684211				0.184262	0.184262	5.77366e-05	0.000970595
SRSF1_K562	PSMD4	2	1:151234637-151234777	1:3	0.785171	0.779026	0.973203	0.959339				-0.184173	0.184173	0	0
SRSF1_K562	YEATS2	27	3:183521044-183521123	26:28	0.893617	0.738095	1	1				-0.184144	0.184144	4.50884e-08	1.63656e-06
SRSF1_K562	USP33	2	1:78211106-78211284	1:3	0.330097	0.388889	0.547619	0.539326				-0.183979	0.183979	0.000643063	0.00748148
SRSF1_K562	AURKA	3	20:54963743-54963840	2:4	0.479592	0.6	0.701754	0.745455				-0.183809	0.183809	0.000152265	0.00221156
SRSF1_K562	STIL	2	1:47778620-47778828	1:3	0.0215054	0.0121951	0.184615	0.216216				-0.183566	0.183566	9.86095e-09	3.97775e-07
SRSF1_K562	PLCD1	9	3:38051395-38051544	8:10	0.85625	0.771812	1	0.994949				-0.183444	0.183444	0	0
SRSF1_K562	NT5C3	10	7:33055282-33055482	9:11	0.821429	0.8125	1	1				-0.183036	0.183036	6.51701e-14	5.23486e-12
SRSF1_K562	NCOA1	22	2:24990948-24991004	21:23	0.657143	0.785714	0.875	0.933333				-0.182738	0.182738	0.00634622	0.0458219
SRSF1_K562	WDR67	3	8:124094942-124095057	2:4	0.987179	0.957447	0.754098	0.826923				0.181802	0.181802	1.4149e-06	3.67138e-05
SRSF1_K562	POLE2	13	14:50121502-50121556	12:14	0.986667	0.943396	0.785714	0.780822				0.181763	0.181763	1.7538e-06	4.44465e-05
SRSF1_K562	TATDN1	10	8:125516081-125516192	9:11	0.25	0.266667	0.0736842	0.079646				0.181668	0.181668	4.89304e-05	0.000847226
SRSF1_K562	SLC7A11	9	4:139103451-139103547	8:10	0.866667	0.95	0.758621	0.695122				0.181462	0.181462	0.00601027	0.0440284
SRSF1_K562	NF1	54	17:29683478-29683600	53:55	0.760563	0.816901	0.986486	0.953846				-0.181434	0.181434	1.07324e-06	2.89884e-05
SRSF1_K562	KDM1A	3	1:23370920-23370979	2:4	0.277778	0.254144	0.444444	0.45				-0.181262	0.181262	1.65534e-13	1.24826e-11
SRSF1_K562	ESYT2	16	7:158545472-158545534	15:17	0.302222	0.303867	0.13649	0.107558				0.181021	0.181021	0	0
SRSF1_K562	QTRT1	6	19:10818142-10818291	5:7	0.815789	0.722222	1	0.9				-0.180994	0.180994	0.00126172	0.0129682
SRSF1_K562	EXOSC2	4	9:133573549-133573638	3:5	0.767742	0.850394	0.992481	0.987578				-0.180962	0.180962	3.44169e-15	3.24415e-13
SRSF1_K562	TRIP12	3	2:230725122-230725247	2:4	0.373494	0.355372	0.55	0.540541				-0.180837	0.180837	3.99759e-05	0.000712891
SRSF1_K562	RABGEF1	4	7:66233818-66234012	2:5	0.365854	0.266667	0.140845	0.130435				0.18062	0.18062	0.00199663	0.0186594
SRSF1_K562	KCTD7	10	7:66233818-66234012	8:11	0.365854	0.266667	0.140845	0.130435				0.18062	0.18062	0.00199663	0.0186594
SRSF1_K562	PIK3C2A	10	11:17156658-17156706	9:11	0.930233	0.678571	1	0.969697				-0.180446	0.180446	0.000287555	0.00381651
SRSF1_K562	LCMT1	2	16:25137285-25137451	1:3	0.207317	0.272727	0.0892857	0.030303				0.180228	0.180228	1.91595e-05	0.000374147
SRSF1_K562	PPP2R5C	19	14:102384168-102384284	18:20	0.375	0.463415	0.584	0.614754				-0.18017	0.18017	9.35401e-05	0.00145959
SRSF1_K562	SUV39H2	2	10:14923499-14923644	1:3	0.430556	0.532258	0.269231	0.333333				0.180125	0.180125	0.00274881	0.0239662
SRSF1_K562	SRRM2	2	16:2806335-2806607	1:3	0.788235	0.740157	0.956897	0.930435				-0.179469	0.179469	6.64167e-09	2.74508e-07
SRSF1_K562	WDR67	12	8:124132295-124132428	11:13	1	0.975	0.843137	0.774194				0.178835	0.178835	7.12586e-06	0.000153618
SRSF1_K562	SCPEP1	10	17:55075735-55075859	9:11	0.763158	0.78125	0.978723	0.923077				-0.178696	0.178696	0.000631709	0.00736795
SRSF1_K562	HDAC5	16	17:42162390-42162523	15:17	0.857143	0.785714	1	1				-0.178571	0.178571	1.75449e-05	0.000348915
SRSF1_K562	USP3	4	15:63826002-63826117	3:5	0.256757	0.230769	0.0659341	0.0645161				0.178538	0.178538	2.62609e-05	0.000491063
SRSF1_K562	BAT2D1	34	1:171558508-171558744	33:35	0.0649351	0.0971429	0.28	0.238806				-0.178364	0.178364	0.000328389	0.00426052
SRSF1_K562	XRRA1	18	11:74554899-74555004	17:19	0.729167	0.777778	0.974359	0.888889				-0.178152	0.178152	0.00113535	0.0119792
SRSF1_K562	SENP5	8	3:196654667-196654750	7:9	0.951807	0.979592	0.808511	0.766667				0.178111	0.178111	1.58359e-05	0.00031801
SRSF1_K562	SLC43A1	7	11:57265226-57265318	6:8	0.8	0.789474	0.987805	0.957447				-0.177889	0.177889	0.00207706	0.0192542
SRSF1_K562	ATAD3B	17	1:1425072-1425191	16:18	0	0	0.25	0.105263				-0.177632	0.177632	4.66266e-10	2.35362e-08
SRSF1_K562	ARHGAP1	7	11:46703601-46703732	5:8	0.703704	0.731707	0.9375	0.852941				-0.177515	0.177515	0.00553598	0.0413408
SRSF1_K562	LTBP4	25	19:41122795-41122926	24:26	0.717391	0.8	0.959184	0.913043				-0.177418	0.177418	0.000619613	0.00725393
SRSF1_K562	TMEM11	3	17:21114249-21114540	1:4	0.689076	0.595041	0.54717	0.383333				0.176807	0.176807	0.00234704	0.0212348
SRSF1_K562	PLEKHM2	7	1:16047824-16047883	6:8	0.851852	0.783505	0.580645	0.701493				0.17661	0.17661	0.000820623	0.00921642
SRSF1_K562	HMGN5	3	X:80375287-80375316	2:4	1	0.915663	0.824074	0.738462				0.176564	0.176564	1.11664e-07	3.82035e-06
SRSF1_K562	NDEL1	9	17:8366638-8366672	8:10	0.0864198	0.266667	0	0				0.176543	0.176543	4.51336e-05	0.000788878
SRSF1_K562	CENPA	11	2:27015624-27015701	10:12	0.805825	0.644737	0.884354	0.918919				-0.176355	0.176355	6.37381e-06	0.000139356
SRSF1_K562	SEPT6	14	X:118759298-118759342	12:15	0.745763	0.651163	0.473684	0.571429				0.175906	0.175906	0.00256463	0.0227796
SRSF1_K562	EIF4E2	3	2:233422594-233422728	2:4	0.726829	0.790419	0.939227	0.929245				-0.175612	0.175612	1.25691e-11	7.76633e-10
SRSF1_K562	GLYR1	13	16:4863738-4863839	12:14	0.830601	0.818182	1	1				-0.175609	0.175609	9.20339e-06	0.000194101
SRSF1_K562	C16orf88	3	16:19722694-19722762	2:4	0.722892	0.859649	0.972477	0.961165				-0.175551	0.175551	5.70034e-08	2.03702e-06
SRSF1_K562	ASPM	18	1:197069561-197074315	17:19	0.492754	0.431373	0.67	0.604651				-0.175262	0.175262	0.000217037	0.00300131
SRSF1_K562	INTS9	5	8:28704264-28704326	4:6	0.569231	0.642857	0.805195	0.757143				-0.175125	0.175125	0.00213272	0.0196617
SRSF1_K562	USP48	12	1:22050391-22050588	11:13	0.804545	0.795918	0.960145	0.990566				-0.175124	0.175124	0	0
SRSF1_K562	NFATC3	14	16:68248232-68248335	13:15	0.188679	0.117647	0.444444	0.212121				-0.17512	0.17512	0.00609543	0.0445463
SRSF1_K562	ZNF250	5	8:146112225-146112287	4:6	1	1	0.95	0.7				0.175	0.175	0.000197618	0.00276172
SRSF1_K562	MYO19	12	17:34868501-34868622	11:13	0	0.0135135	0.191489	0.171875				-0.174925	0.174925	6.39339e-10	3.1331e-08
SRSF1_K562	MADD	35	11:47348289-47348358	34:36	0.892562	0.984127	0.721311	0.80597				0.174704	0.174704	4.29679e-05	0.00075604
SRSF1_K562	RFWD3	2	16:74698522-74698643	1:3	0.313953	0.298701	0.5	0.461538				-0.174442	0.174442	0.00266862	0.0234664
SRSF1_K562	PQLC3	5	2:11312051-11312171	4:6	0.814815	0.777778	1	0.941176				-0.174292	0.174292	0.0026864	0.023589
SRSF1_K562	GRB10	23	7:50671695-50671782	22:24	0.818182	0.833333	1	1				-0.174242	0.174242	1.11022e-16	1.17881e-14
SRSF1_K562	SUGT1	7	13:53235610-53235705	6:8	0.123711	0.0915033	0.236181	0.326829				-0.173898	0.173898	1.18128e-09	5.48343e-08
SRSF1_K562	PAN2	26	12:56712021-56712218	25:27	0.854167	0.72973	0.967742	0.963855				-0.17385	0.17385	2.09916e-06	5.22667e-05
SRSF1_K562	CNOT2	5	12:70687851-70688074	4:6	0.229167	0.195652	0.0291262	0.048				0.173846	0.173846	4.16112e-06	9.53804e-05
SRSF1_K562	MTDH	7	8:98711982-98712080	6:8	0.943144	0.935223	0.756014	0.774691				0.173831	0.173831	0	0
SRSF1_K562	IMPDH2	5	3:49065143-49065349	4:6	0.845722	0.806962	1	1				-0.173658	0.173658	0	0
SRSF1_K562	ILF3	18	19:10795092-10795152	17:19	0.25969	0.263158	0.389408	0.48				-0.17328	0.17328	0.000577195	0.00685767
SRSF1_K562	MDN1	86	6:90372511-90372686	85:87	0.794872	0.768595	0.96875	0.940828				-0.173056	0.173056	2.21391e-10	1.1653e-08
SRSF1_K562	NAA35	18	9:88627961-88628059	17:19	0.694444	0.720588	0.916667	0.844444				-0.173039	0.173039	0.000189933	0.00267251
SRSF1_K562	CHD1L	15	1:146751699-146751864	14:16	0.742268	0.831169	0.967033	0.952381				-0.172989	0.172989	8.0476e-10	3.83194e-08
SRSF1_K562	CSDE1	6	1:115280092-115280184	5:7	0.311183	0.305609	0.130172	0.140673				0.172974	0.172974	0	0
SRSF1_K562	ZDHHC8	5	22:20127638-20127740	4:6	0.861111	0.793103	1	1				-0.172893	0.172893	0.00109504	0.0115936
SRSF1_K562	PHLDB1	28	11:118521150-118521252	27:29	0.827586	0.75	1	0.923077				-0.172745	0.172745	0.0042479	0.0337693
SRSF1_K562	TRMT2A	8	22:20101209-20101331	7:9	0.774775	0.846847	0.965517	1				-0.171948	0.171948	2.01055e-07	6.51665e-06
SRSF1_K562	EHMT1	8	9:140646783-140646860	7:9	0.650794	0.745455	0.837209	0.902439				-0.1717	0.1717	0.00517234	0.0391314
SRSF1_K562	SCAMP3	2	1:155231448-155231525	1:3	0.881944	0.953125	0.711538	0.780488				0.171522	0.171522	3.88128e-05	0.000694832
SRSF1_K562	ETV4	5	17:41622343-41622390	4:6	0.731707	0.891892	0.966102	1				-0.171251	0.171251	2.80293e-05	0.000523071
SRSF1_K562	KEL	11	7:142643294-142643404	10:12	0.609375	0.828125	0.877551	0.902439				-0.171245	0.171245	0.00373806	0.0304634
SRSF1_K562	ECT2	26	3:172536338-172536604	25:27	0.0808824	0.0783133	0.226415	0.273504				-0.170362	0.170362	7.44099e-05	0.00120168
SRSF1_K562	FNIP1	7	5:131046271-131046354	6:8	0.0606061	0.0285714	0.222222	0.206897				-0.169971	0.169971	0.00164349	0.0160399
SRSF1_K562	DMXL1	35	5:118542529-118542591	34:36	0.0857143	0.0416667	0.262295	0.204819				-0.169867	0.169867	0.000187857	0.00265076
SRSF1_K562	C6orf203	2	6:107351229-107351311	1:3	0.259259	0.15	0.0487805	0.0208333				0.169823	0.169823	0.00264478	0.0232899
SRSF1_K562	BAT3	24	6:31608162-31608305	23:25	0.819712	0.806452	0.975186	0.990476				-0.16975	0.16975	0	0
SRSF1_K562	METTL13	5	1:171759592-171759756	4:6	0.85	0.90625	0.695652	0.721649				0.169474	0.169474	1.9355e-05	0.000376404
SRSF1_K562	MED15	11	22:20929400-20929519	10:12	0.613861	0.546218	0.710145	0.788462				-0.169263	0.169263	0.00217926	0.0200208
SRSF1_K562	BTN2A1	2	6:26458835-26458946	1:3	0.875	0.74359	1	0.956522				-0.168966	0.168966	0.00156542	0.0154493
SRSF1_K562	HDAC1	7	1:32794669-32794761	6:8	0.764069	0.728814	0.928389	0.902062				-0.168784	0.168784	0	0
SRSF1_K562	SIN3B	10	19:16973695-16973790	9:11	0.0434783	0	0.166667	0.214286				-0.168737	0.168737	0.00281037	0.0243669
SRSF1_K562	ANAPC16	3	10:73983646-73983814	2:4	0.854839	0.761905	0.985646	0.968254				-0.168578	0.168578	1.09196e-09	5.0816e-08
SRSF1_K562	ATP13A2	16	1:17320124-17320330	15:17	0.954545	0.708333	1	1				-0.168561	0.168561	0.0011436	0.0120456
SRSF1_K562	TANK	8	2:162087482-162088062	7:9	0.763441	0.888889	0.989362	1				-0.168516	0.168516	6.76125e-10	3.27859e-08
SRSF1_K562	ZDHHC16	8	10:99213556-99213603	7:9	0.885714	0.939394	0.707317	0.78125				0.168271	0.168271	0.00624522	0.0452828
SRSF1_K562	MS4A3	6	11:59837047-59837148	5:7	1	1	0.8	0.864198				0.167901	0.167901	2.91389e-09	1.27569e-07
SRSF1_K562	IGF2BP2	11	3:185390329-185390457	10:12	0.666667	0.617021	0.75	0.868852				-0.167582	0.167582	0.00518923	0.039195
SRSF1_K562	ZNF33B	2	10:43132368-43132420	1:3	0.976471	0.926471	0.75	0.818182				0.16738	0.16738	5.67624e-06	0.000125742
SRSF1_K562	GLYR1	9	16:4871548-4871598	8:10	0.691649	0.667656	0.866995	0.826087				-0.166889	0.166889	2.28382e-05	0.000435434
SRSF1_K562	NCOR1	35	17:15971208-15971435	34:36	0.869048	0.797297	1	1				-0.166828	0.166828	8.70046e-07	2.41716e-05
SRSF1_K562	WNK4	14	17:40946790-40947400	13:15	0.666667	1	1	1				-0.166667	0.166667	0.00243322	0.0218647
SRSF1_K562	CCDC134	2	22:42204879-42204997	1:3	0.666667	1	1	1				-0.166667	0.166667	0.00558652	0.0416173
SRSF1_K562	ARHGAP12	13	10:32106716-32106814	12:14	1	1	0.833333	0.833333				0.166667	0.166667	0.00178014	0.0171025
SRSF1_K562	GOLGA4	7	3:37327505-37327552	6:9	0.898305	0.929412	0.735294	0.759615				0.166404	0.166404	6.70256e-06	0.00014534
SRSF1_K562	IKZF1	6	7:50444231-50444491	5:7	0.772727	0.894737	1	1				-0.166268	0.166268	0.00263582	0.0232682
SRSF1_K562	TPD52L1	7	6:125573168-125574901	6:8	0.927835	0.875	0.641026	0.829545				0.166132	0.166132	4.05017e-05	0.000718109
SRSF1_K562	YLPM1	5	14:75264283-75266400	4:6	0.784314	0.709677	0.906977	0.918367				-0.165676	0.165676	0.00485063	0.0373398
SRSF1_K562	BCLAF1	13	6:136588167-136588313	12:14	0.700516	0.716904	0.872832	0.875648				-0.16553	0.16553	0	0
SRSF1_K562	UBR7	4	14:93678378-93678473	3:5	0.73	0.707692	0.886076	0.882353				-0.165368	0.165368	0.00016757	0.00240175
SRSF1_K562	AP3M1	2	10:75898564-75898689	1:3	0.504202	0.559471	0.706977	0.687151				-0.165227	0.165227	7.23722e-07	2.04446e-05
SRSF1_K562	ANKRD27	4	19:33137365-33137521	3:5	0.784091	0.797101	0.954955	0.95614				-0.164951	0.164951	9.24524e-07	2.54043e-05
SRSF1_K562	UBR3	4	2:170734004-170734147	3:5	0.821138	0.724138	0.910448	0.964706				-0.164939	0.164939	1.28478e-05	0.000263445
SRSF1_K562	ANKRD52	18	12:56641807-56642008	17:19	0.795455	0.875	1	1				-0.164773	0.164773	0.000466323	0.00575891
SRSF1_K562	TSPAN17	5	5:176081896-176082021	4:6	0.663551	0.643478	0.78481	0.851351				-0.164566	0.164566	0.000473998	0.00583808
SRSF1_K562	NADSYN1	14	11:71192402-71192450	13:15	0.833333	0.83871	1	1				-0.163978	0.163978	6.86334e-05	0.0011286
SRSF1_K562	PUS7L	5	12:44136260-44136358	4:6	0.7375	0.867925	0.933333	1				-0.163954	0.163954	9.26613e-05	0.0014471
SRSF1_K562	QRSL1	6	6:107100084-107100259	5:7	0.903226	0.769231	1	1				-0.163772	0.163772	4.66738e-07	1.38856e-05
SRSF1_K562	AP2M1	6	3:183898297-183898438	5:7	0.831806	0.831926	0.670148	0.666045				0.16377	0.16377	0	0
SRSF1_K562	CHEK2	14	22:29092889-29092975	13:15	0.973684	0.978723	0.795918	0.830357				0.163066	0.163066	8.5577e-09	3.4596e-07
SRSF1_K562	PIKFYVE	9	2:209163365-209163503	8:10	0.85	0.825	1	1				-0.1625	0.1625	6.72437e-07	1.91422e-05
SRSF1_K562	AKAP11	3	13:42860122-42860171	2:4	0.777778	0.916667	0.658537	0.711538				0.162185	0.162185	0.00664624	0.0475942
SRSF1_K562	PEX2	3	8:77900543-77900574	2:4	0.897727	0.892157	0.69697	0.769231				0.161842	0.161842	5.32701e-06	0.000119148
SRSF1_K562	RNF34	2	12:121840545-121840610	1:3	0.455556	0.395604	0.178571	0.35				0.161294	0.161294	0.00381601	0.0309621
SRSF1_K562	SYK	9	9:93629413-93629518	8:10	1	1	0.918919	0.758621				0.16123	0.16123	0.000218667	0.00301709
SRSF1_K562	CCDC104	12	2:55771356-55771505	11:13	0.821918	0.842105	1	0.985849				-0.160913	0.160913	4.44089e-16	4.5329e-14
SRSF1_K562	TAF1	38	X:70679000-70679101	37:39	0.746269	0.732673	0.562044	0.595238				0.16083	0.16083	0.000172436	0.00246194
SRSF1_K562	CDC16	2	13:115002120-115002174	1:3	0.786885	0.510204	0.815385	0.80303				-0.160663	0.160663	0.00697452	0.049181
SRSF1_K562	DPH3	2	3:16305662-16305736	1:3	0.914894	0.909836	0.735294	0.768116				0.16066	0.16066	4.50681e-07	1.3473e-05
SRSF1_K562	PTP4A3	5	8:142437850-142437924	4:6	0.826667	0.837209	1	0.985075				-0.160599	0.160599	3.26187e-07	1.00438e-05
SRSF1_K562	C21orf59	6	21:33974582-33974677	5:7	0.833641	0.811816	0.982922	0.982625				-0.160045	0.160045	0	0
SRSF1_K562	EZH1	5	17:40876323-40876442	4:6	0.868421	0.859155	0.671233	0.736264				0.16004	0.16004	0.000515865	0.00628075
SRSF1_K562	ZSCAN12	2	6:28365781-28366250	1:3	0.829787	0.745098	0.953488	0.941176				-0.15989	0.15989	0.00100331	0.0108526
SRSF1_K562	JMJD8	8	16:732953-733087	7:9	0.828125	0.852941	1	1				-0.159467	0.159467	0.000140345	0.00207099
SRSF1_K562	C10orf4	8	10:95452403-95452486	7:9	0.933333	0.735849	1	0.987805				-0.159311	0.159311	1.2678e-07	4.30563e-06
SRSF1_K562	CSNK1G3	13	5:122941033-122941056	12:14	0.171429	0.235294	0.06	0.0289855				0.158869	0.158869	0.00228629	0.020787
SRSF1_K562	DSN1	3	20:35399276-35399596	2:4	0.818182	0.8	0.95	0.985507				-0.158663	0.158663	3.95556e-06	9.13488e-05
SRSF1_K562	STYX	8	14:53224592-53224642	7:9	0.8	0.772727	0.980392	0.909091				-0.158378	0.158378	0.00448132	0.0350915
SRSF1_K562	PPP6R1	10	19:55752607-55752759	9:11	0.877193	0.785714	0.979592	1				-0.158342	0.158342	4.04271e-05	0.000717475
SRSF1_K562	CHEK1	9	11:125507344-125507439	8:10	0.989529	0.974194	0.800926	0.846154				0.158321	0.158321	9.4369e-15	8.30222e-13
SRSF1_K562	CLSPN	25	1:36197713-36202207	24:26	0.933333	0.955556	0.727273	0.846154				0.157731	0.157731	0.00107614	0.0114658
SRSF1_K562	PPPDE1	4	1:244852551-244852644	3:5	0.591398	0.741935	0.815217	0.833333				-0.157609	0.157609	0.000414091	0.00517964
SRSF1_K562	C9orf114	4	9:131589311-131589470	3:5	0.869565	0.791667	0.97561	1				-0.157189	0.157189	0.000109411	0.00166917
SRSF1_K562	PHF21A	17	11:45959708-45959863	16:18	0.803279	0.882353	1	1				-0.157184	0.157184	2.59497e-08	9.84662e-07
SRSF1_K562	CASP2	10	7:142997473-142997533	9:11	0.0697674	0.112069	0.25	0.245902				-0.157033	0.157033	4.90562e-05	0.000847814
SRSF1_K562	PPT1	8	1:40542514-40542585	7:9	0.822266	0.828496	0.997436	0.967213				-0.156944	0.156944	0	0
SRSF1_K562	POLR2E	4	19:1090907-1090987	3:5	0.830882	0.834184	0.989761	0.98917				-0.156932	0.156932	0	0
SRSF1_K562	KDM1B	14	6:18201717-18201888	13:15	0.886364	0.744186	0.992308	0.951724				-0.156741	0.156741	1.75253e-06	4.44465e-05
SRSF1_K562	ARAP3	32	5:141034929-141034967	31:33	0.79661	0.809524	0.948718	0.970588				-0.156586	0.156586	0.00132511	0.0135182
SRSF1_K562	CCNF	3	16:2482962-2483068	2:4	0.833333	0.811881	1	0.957746				-0.156266	0.156266	1.67863e-07	5.57781e-06
SRSF1_K562	ZNF280D	22	15:56946396-56946432	21:23	1	1	0.6875	1				0.15625	0.15625	0.00211364	0.019515
SRSF1_K562	SRA1	3	5:139931567-139931769	2:4	0.78	0.870588	0.962963	1				-0.156187	0.156187	3.10837e-06	7.40039e-05
SRSF1_K562	DIAPH3	2	13:60707091-60707123	1:3	0.735849	0.875	0.923077	1				-0.156114	0.156114	0.00112421	0.0118752
SRSF1_K562	USP32	24	17:58289385-58289459	23:25	0.945455	1	0.813559	0.819672				0.156112	0.156112	0.000234115	0.00320391
SRSF1_K562	DNAH14	4	1:225147855-225148004	3:5	0.729885	0.818966	0.92	0.940722				-0.155936	0.155936	9.87166e-12	6.18234e-10
SRSF1_K562	DCAF10	6	9:37857238-37857348	5:7	0.837209	0.91	0.70297	0.732673				0.155783	0.155783	6.44649e-05	0.00106911
SRSF1_K562	NBEAL2	11	3:47033965-47034045	10:12	0.115385	0.107143	0.291667	0.242424				-0.155782	0.155782	0.00700977	0.0493318
SRSF1_K562	ITGB3BP	2	1:63975736-63975852	1:3	0.0165563	0.0234899	0.217647	0.133721				-0.155661	0.155661	0	0
SRSF1_K562	EIF5A2	2	3:170625431-170625630	1:3	0.809524	0.851852	0.972222	1				-0.155423	0.155423	0.00162297	0.01589
SRSF1_K562	STX18	8	4:4426891-4426949	7:9	0.974138	0.94898	0.777778	0.835821				0.154759	0.154759	4.3775e-06	9.95989e-05
SRSF1_K562	RNF2	4	1:185062193-185062408	3:5	0.827068	0.804688	0.983146	0.958115				-0.154753	0.154753	6.18218e-11	3.4299e-09
SRSF1_K562	SMG7	19	1:183516238-183516387	18:20	0	0.00877193	0.174312	0.142857				-0.154199	0.154199	1.23315e-11	7.6451e-10
SRSF1_K562	SFRS6	3	20:42087793-42088060	2:4	0.596899	0.536364	0.772727	0.666667				-0.153066	0.153066	0.00450246	0.0351725
SRSF1_K562	STARD3NL	2	7:38218692-38218747	1:3	0.114286	0.223214	0.321168	0.322034				-0.152851	0.152851	0.000254596	0.00343333
SRSF1_K562	RSRC2	5	12:123005051-123005128	4:6	0.197479	0.158228	0.0161943	0.0343348				0.152589	0.152589	2.33147e-15	2.25518e-13
SRSF1_K562	DCAF8	15	1:160194852-160194909	14:16	0.959091	0.973118	0.784615	0.842795				0.1524	0.1524	3.20965e-13	2.34381e-11
SRSF1_K562	PEX19	17	1:160194852-160194909	16:18	0.959091	0.973118	0.784615	0.842795				0.1524	0.1524	3.20965e-13	2.34381e-11
SRSF1_K562	RIT1	2	1:155880447-155880595	1:3	0.794872	0.866667	0.980769	0.985075				-0.152153	0.152153	8.07363e-05	0.0012892
SRSF1_K562	EXOC6	11	10:94679739-94679807	10:12	0.783784	0.797101	0.971429	0.91358				-0.152062	0.152062	0.000126508	0.00189404
SRSF1_K562	KIF21A	24	12:39724044-39724064	23:25	0.18	0.172414	0.0307692	0.0175439				0.15205	0.15205	7.0531e-05	0.00115417
SRSF1_K562	GPSM2	9	1:109445748-109445856	8:10	0.901961	0.794118	1	1				-0.151961	0.151961	2.81037e-08	1.06179e-06
SRSF1_K562	ZDHHC17	4	12:77202823-77202900	3:5	0.862745	0.833333	1	1				-0.151961	0.151961	0.000163035	0.00234403
SRSF1_K562	CCRN4L	2	4:139964228-139965034	1:3	0.863636	0.833333	1	1				-0.151515	0.151515	0.00636986	0.045952
SRSF1_K562	POLE	39	12:133217604-133218437	38:40	0.84	0.858974	1	1				-0.150513	0.150513	2.05452e-08	7.89133e-07
SRSF1_K562	CENPL	5	1:173775577-173775714	4:6	0.0512821	0.0263158	0.184211	0.19403				-0.150321	0.150321	0.000195718	0.00273931
SRSF1_K562	ZNF207	10	17:30693684-30693776	9:11	0.559896	0.540123	0.666667	0.733796				-0.150222	0.150222	8.51784e-10	4.03505e-08
SRSF1_K562	ERCC2	2	19:45873391-45873490	1:3	0.816327	0.87234	0.988889	1				-0.150111	0.150111	5.9266e-07	1.7216e-05
SRSF1_K562	PUM1	14	1:31437521-31437757	13:15	0.852273	0.761364	0.962963	0.95082				-0.150073	0.150073	1.7523e-05	0.000348915
SRSF1_K562	EML2	22	19:46119719-46119816	21:23	0.714286	0.737705	0.866667	0.885246				-0.149961	0.149961	0.00184885	0.0176148
SRSF1_K562	POLA1	13	X:24744098-24744172	12:14	1	1	0.923077	0.777778				0.149573	0.149573	0.00137893	0.0138984
SRSF1_K562	RC3H1	9	1:173941647-173941765	8:10	1	1	0.777778	0.923077				0.149573	0.149573	0.000577136	0.00685767
SRSF1_K562	SECISBP2	11	9:91954779-91954868	10:12	1	1	0.785714	0.915254				0.149516	0.149516	7.06245e-05	0.00115468
SRSF1_K562	SSB	5	2:170661984-170662087	4:6	0.847415	0.831446	0.991408	0.985907				-0.149227	0.149227	0	0
SRSF1_K562	KIF1B	51	1:10434912-10435104	50:52	0.793103	0.909091	1	1				-0.148903	0.148903	0.000338437	0.00435723
SRSF1_K562	IFT46	4	11:118428453-118428605	3:5	0.0882353	0.025	0.210526	0.2				-0.148646	0.148646	0.00366702	0.0299638
SRSF1_K562	FIG4	3	6:110037648-110037771	2:4	0.818182	0.884615	1	1				-0.148601	0.148601	0.00358341	0.0294369
SRSF1_K562	CCDC84	8	11:118882859-118882964	7:9	0.869565	0.833333	1	1				-0.148551	0.148551	0.00211657	0.0195225
SRSF1_K562	VRK2	13	2:58313462-58313561	12:14	0.916667	0.763158	1	0.97619				-0.148183	0.148183	0.00025991	0.00349734
SRSF1_K562	KIAA0430	24	16:15694498-15694558	23:25	0.928571	0.75	0.974359	1				-0.147894	0.147894	0.000357679	0.00456993
SRSF1_K562	ACSL1	19	4:185687045-185687140	18:20	0.896552	0.807692	1	1				-0.147878	0.147878	0.00349451	0.0288347
SRSF1_K562	GOLGA2	7	9:131029473-131029553	6:8	0.818182	0.80719	0.669746	0.659955				0.147835	0.147835	9.13336e-12	5.759e-10
SRSF1_K562	RNMTL1	2	17:686323-686567	1:3	0.823529	0.829268	0.97619	0.972222				-0.147807	0.147807	0.000963858	0.0105058
SRSF1_K562	PYCR1	7	17:79892202-79892365	6:8	0.689474	0.693989	0.857143	0.821429				-0.147554	0.147554	0.000937694	0.0102873
SRSF1_K562	ZNF498	3	7:99216671-99216755	2:4	1	1	0.941176	0.764706				0.147059	0.147059	0.00273767	0.0238916
SRSF1_K562	GON4L	33	1:155722995-155723205	32:34	0.875	0.75	1	0.918919				-0.146959	0.146959	0.000843413	0.00940377
SRSF1_K562	NAA25	17	12:112487287-112487415	16:18	0.333333	0.288462	0.135417	0.192661				0.146859	0.146859	0.00675992	0.0482199
SRSF1_K562	UGGT1	39	2:128941249-128941363	38:40	0.87234	0.723404	0.925234	0.963636				-0.146563	0.146563	8.48043e-05	0.00134601
SRSF1_K562	LRP8	9	1:53736700-53736825	8:10	0.862745	0.76087	0.938462	0.978261				-0.146554	0.146554	0.00107032	0.0114103
SRSF1_K562	ACRBP	10	12:6747841-6748017	9:11	0.0434783	0.0273973	0.170213	0.193548				-0.146443	0.146443	0.000293177	0.00387997
SRSF1_K562	NIT1	2	1:161088576-161088671	1:3	0.822785	0.859155	0.974684	1				-0.146372	0.146372	4.17196e-06	9.55002e-05
SRSF1_K562	RBPJ	5	4:26364068-26364251	3:6	0.207317	0.163399	0.319328	0.344				-0.146306	0.146306	4.55951e-05	0.000793939
SRSF1_K562	DNM1L	17	12:32891198-32891230	16:18	0.848485	0.714286	0.893617	0.961538				-0.146192	0.146192	0.00584228	0.0431246
SRSF1_K562	SOS1	24	2:39216411-39216455	23:25	0.914894	0.978261	0.782609	0.818182				0.146182	0.146182	0.0065584	0.0471032
SRSF1_K562	MPRIP	9	17:17046870-17046983	8:10	0.820513	0.852941	0.965517	1				-0.146032	0.146032	0.00192758	0.0181417
SRSF1_K562	DHX57	24	2:39033701-39033835	23:25	0.973684	0.952381	0.869565	0.764706				0.145897	0.145897	0.000103723	0.00159691
SRSF1_K562	TFIP11	3	22:26907085-26907161	2:4	0.0188679	0.025641	0.214286	0.121951				-0.145864	0.145864	0.00106132	0.0113406
SRSF1_K562	CREBBP	2	16:3900298-3901010	1:3	0.833333	0.875	1	1				-0.145833	0.145833	0.00214941	0.019786
SRSF1_K562	MED23	15	6:131926380-131926625	14:16	0.860215	0.835443	1	0.986667				-0.145504	0.145504	2.14178e-07	6.89363e-06
SRSF1_K562	MED13	13	17:60062361-60062451	12:14	0.8	0.909091	1	1				-0.145455	0.145455	1.55133e-06	3.98068e-05
SRSF1_K562	UBAP2L	27	1:154235579-154235981	26:28	0.328076	0.336806	0.43038	0.525346				-0.145422	0.145422	2.03815e-06	5.0885e-05
SRSF1_K562	CRYZ	2	1:75196066-75196104	1:3	0.275132	0.228632	0.116022	0.0971867				0.145278	0.145278	1.77636e-15	1.73641e-13
SRSF1_K562	RBM38	3	20:55968335-55968389	2:4	0.963415	1	0.909091	0.764706				0.144809	0.144809	6.89538e-05	0.00113237
SRSF1_K562	BRCA1	10	17:41247863-41247939	9:11	0.869565	0.840909	1	1				-0.144763	0.144763	2.86931e-07	8.96962e-06
SRSF1_K562	EGLN1	6	1:231503315-231503382	4:7	0.984127	0.989583	0.850649	0.834356				0.144353	0.144353	7.50152e-10	3.59976e-08
SRSF1_K562	PPWD1	6	5:64867666-64868113	5:7	0.814815	0.769912	0.923077	0.95				-0.144175	0.144175	1.38928e-06	3.62528e-05
SRSF1_K562	UBAP2	5	9:33996221-33996331	4:6	0.893805	0.772727	0.954545	1				-0.144006	0.144006	0.000869282	0.00962829
SRSF1_K562	MED24	7	17:38191169-38191225	6:8	0.240385	0.224719	0.102564	0.075				0.14377	0.14377	0.00401197	0.0322266
SRSF1_K562	TXNDC11	4	16:11824501-11824630	3:5	0.9625	0.9	0.795455	0.779661				0.143692	0.143692	0.000560553	0.00669007
SRSF1_K562	ARNT	6	1:150814900-150814944	5:7	0.871212	0.863354	0.741007	0.70625				0.143654	0.143654	0.00268083	0.0235513
SRSF1_K562	YIPF2	4	19:11038306-11038392	3:5	0.777778	0.885246	1	0.95				-0.143488	0.143488	8.69788e-05	0.00137698
SRSF1_K562	KRIT1	2	7:91874741-91874909	1:3	0.106061	0.0597015	0.231884	0.220339				-0.14323	0.14323	0.000395523	0.00497433
SRSF1_K562	RELA	5	11:65429158-65429339	4:6	0.82	0.894737	1	1				-0.142632	0.142632	0.00132873	0.013538
SRSF1_K562	SLC35C2	6	20:44984441-44984513	5:7	0.842105	0.830189	0.981132	0.97619				-0.142514	0.142514	0.000265055	0.00356138
SRSF1_K562	HNRNPR	6	1:23650049-23650225	5:7	0.837158	0.821847	0.970629	0.972452				-0.142038	0.142038	0	0
SRSF1_K562	SAAL1	10	11:18105082-18105278	9:11	0.782609	0.779412	0.938272	0.907563				-0.141907	0.141907	0.000303307	0.00398207
SRSF1_K562	OGT	8	X:70775040-70775235	7:9	0.977124	0.987288	0.861244	0.819876				0.141646	0.141646	0	0
SRSF1_K562	IMMP1L	2	11:31495271-31495333	1:3	0.030303	0.0947368	0.216667	0.191176				-0.141402	0.141402	0.000218944	0.00301864
SRSF1_K562	TMEM116	10	12:112374496-112374634	9:11	0.88	0.942857	0.72619	0.813953				0.141357	0.141357	0.00587904	0.0433248
SRSF1_K562	FCHO2	7	5:72311453-72311551	6:8	0.717391	1	1	1				-0.141304	0.141304	0.0016072	0.015769
SRSF1_K562	C10orf128	6	10:50373250-50373406	5:7	0.113636	0.0568182	0.216667	0.236364				-0.141288	0.141288	0.00033058	0.00427694
SRSF1_K562	PRKAR2A	10	3:48789609-48789750	9:11	0.725275	0.7875	0.92233	0.872727				-0.141141	0.141141	0.000278819	0.00372196
SRSF1_K562	COMMD4	3	15:75630696-75630765	2:4	0.721429	0.746377	0.877934	0.871429				-0.140779	0.140779	0.00354457	0.0291827
SRSF1_K562	PSMD6	3	3:64008319-64008477	2:4	0.132812	0.122807	0.236842	0.3				-0.140611	0.140611	0.000158279	0.00228811
SRSF1_K562	WAS	3	X:48543936-48544022	2:4	0.848485	0.84	0.969697	1				-0.140606	0.140606	0.00440108	0.0346442
SRSF1_K562	RFC2	6	7:73660992-73661093	5:7	0.830986	0.803738	0.96347	0.952381				-0.140564	0.140564	1.53455e-11	9.29535e-10
SRSF1_K562	CCHCR1	2	6:31125162-31125566	1:3	0	0.0576923	0.18	0.157895				-0.140101	0.140101	0.000184132	0.00261278
SRSF1_K562	PSEN2	2	1:227058963-227059105	1:3	1	0.72	1	1				-0.14	0.14	0.00688186	0.0488026
SRSF1_K562	ENO2	8	12:7028730-7028927	7:9	0.824	0.88172	0.985294	1				-0.139787	0.139787	5.64326e-13	4.00997e-11
SRSF1_K562	ROD1	5	9:115038124-115038293	4:6	0.896739	0.907514	0.772222	0.752525				0.139753	0.139753	3.3919e-07	1.03751e-05
SRSF1_K562	CREB3L4	7	1:153945448-153945554	6:8	0.846154	0.875	1	1				-0.139423	0.139423	0.00112797	0.0119081
SRSF1_K562	TOR3A	3	1:179054763-179055028	2:4	0.83908	0.73494	0.905882	0.946429				-0.139145	0.139145	0.00062611	0.00730726
SRSF1_K562	OSBPL9	15	1:52221992-52222030	14:16	0.509615	0.481928	0.620253	0.649383				-0.139046	0.139046	3.14694e-07	9.74291e-06
SRSF1_K562	FGFR1OP2	5	12:27113448-27113561	4:6	0.5	0.537037	0.420561	0.338462				0.139007	0.139007	0.00158252	0.01556
SRSF1_K562	HEATR5A	14	14:31849673-31849784	13:15	0.722222	1	1	1				-0.138889	0.138889	0.00436837	0.0344896
SRSF1_K562	KREMEN1	4	22:29517345-29517469	3:5	0.722222	1	1	1				-0.138889	0.138889	0.00362845	0.0297408
SRSF1_K562	SEC31A	19	4:83783687-83783725	18:20	0.488	0.563636	0.688	0.641379				-0.138871	0.138871	0.00155098	0.0153642
SRSF1_K562	PPM1F	2	22:22300215-22300480	1:3	0.740506	0.798817	0.933333	0.883333				-0.138672	0.138672	0.00400888	0.0322157
SRSF1_K562	C1orf103	2	1:111493910-111495437	1:3	0.730233	0.745455	0.589354	0.609155				0.138589	0.138589	1.10511e-05	0.000229145
SRSF1_K562	TMEM63A	9	1:226054274-226054382	8:10	1	1	0.923077	0.8				0.138462	0.138462	3.18055e-05	0.000584102
SRSF1_K562	CLN3	10	16:28497668-28497811	9:11	1	1	0.8	0.923077				0.138462	0.138462	0.000851732	0.00948508
SRSF1_K562	ATP7A	11	X:77268376-77268609	10:12	0.833333	0.783784	0.893617	1				-0.13825	0.13825	0.00203583	0.0189481
SRSF1_K562	FAM160A2	7	11:6240201-6240280	6:8	0.862069	0.862069	1	1				-0.137931	0.137931	0.000950952	0.0103958
SRSF1_K562	TOM1L1	2	17:52981069-52981153	1:3	0.965517	0.955056	0.823529	0.821429				0.137808	0.137808	2.32929e-05	0.000441823
SRSF1_K562	MUTED	3	6:8054503-8054605	2:4	0.224138	0.125	0.0309278	0.0430108				0.1376	0.1376	7.49241e-05	0.00120893
SRSF1_K562	CAD	34	2:27462565-27462666	33:35	0.855263	0.869565	1	1				-0.137586	0.137586	6.40661e-07	1.83792e-05
SRSF1_K562	ACLY	14	17:40052873-40052902	13:15	0.982993	0.924242	0.831615	0.800926				0.137347	0.137347	9.0556e-05	0.00142264
SRSF1_K562	RAD51	10	15:41022051-41022172	9:11	0.772727	0.796512	0.903226	0.940476				-0.137232	0.137232	4.02217e-07	1.21421e-05
SRSF1_K562	ING4	3	12:6762396-6762562	2:4	0.857143	0.828571	0.754098	0.657534				0.137041	0.137041	0.00306592	0.0260787
SRSF1_K562	NQO1	4	16:69748867-69748980	3:5	0.651515	0.59434	0.780822	0.738854				-0.13691	0.13691	0.000742927	0.00846213
SRSF1_K562	ZNF584	4	19:58927160-58927307	3:5	0.227273	0.0689655	0	0.0227273				0.136755	0.136755	0.00363592	0.0297683
SRSF1_K562	SLBP	2	4:1713601-1713717	1:3	0.880342	0.846154	1	1				-0.136752	0.136752	5.11983e-07	1.50619e-05
SRSF1_K562	FAM178B	19	2:97543627-97543779	18:20	0.835237	0.84168	0.97305	0.976974				-0.136553	0.136553	0	0
SRSF1_K562	NIF3L1	3	2:201755246-201755308	2:4	0	0	0.0645161	0.208333				-0.136425	0.136425	0.00500627	0.0382036
SRSF1_K562	CENPE	25	4:104074204-104074407	24:26	0.893939	0.833333	1	1				-0.136364	0.136364	4.47708e-09	1.88415e-07
SRSF1_K562	PDE8A	9	15:85633949-85634146	8:10	0.0597015	0.0322581	0.179487	0.185185				-0.136356	0.136356	0.00264396	0.0232899
SRSF1_K562	STK19	5	6:31947191-31947330	4:6	0.880734	0.797872	0.984615	0.966102				-0.136055	0.136055	1.09498e-07	3.75322e-06
SRSF1_K562	C4A	3	6:31947191-31947330	2:4	0.880734	0.797872	0.984615	0.966102				-0.136055	0.136055	1.09498e-07	3.75322e-06
SRSF1_K562	TPD52L2	4	20:62507169-62507228	3:5	0.808696	0.838828	0.651408	0.724444				0.135835	0.135835	5.36471e-08	1.9208e-06
SRSF1_K562	CCDC138	2	2:109404488-109404545	1:3	0.980769	1	0.947368	0.761905				0.135748	0.135748	0.000371884	0.00473179
SRSF1_K562	COPE	6	19:19017769-19019134	3:7	0.773196	0.711816	0.879121	0.876812				-0.135461	0.135461	0.00690695	0.0489099
SRSF1_K562	C18orf8	3	18:21086934-21087018	2:4	0.936508	0.74	0.962963	0.984375				-0.135415	0.135415	0.000250629	0.00338766
SRSF1_K562	SLC38A5	12	X:48319372-48319472	11:13	0.847682	0.861314	0.979381	1				-0.135193	0.135193	1.00608e-09	4.74167e-08
SRSF1_K562	FANCA	38	16:89809208-89809346	37:39	0.84375	0.886076	1	1				-0.135087	0.135087	6.66934e-07	1.90442e-05
SRSF1_K562	PCBP2	15	12:53861589-53861627	14:16	0.966206	0.970273	0.850163	0.816153				0.135082	0.135082	0	0
SRSF1_K562	ZHX1	4	8:124265562-124268411	3:5	0.745283	0.742857	0.891892	0.866071				-0.134912	0.134912	0.000540398	0.00651184
SRSF1_K562	C8orf76	4	8:124265562-124268411	3:5	0.745283	0.742857	0.891892	0.866071				-0.134912	0.134912	0.000540398	0.00651184
SRSF1_K562	UBA6	18	4:68506869-68506946	17:19	1	1	0.853933	0.876847				0.13461	0.13461	6.61027e-13	4.62594e-11
SRSF1_K562	KLHDC4	3	16:87790005-87790083	2:4	0.942857	1	0.822581	0.851064				0.134606	0.134606	0.000164813	0.00236591
SRSF1_K562	CLDN12	14	7:90041321-90041363	13:15	0.0869565	0.208333	0	0.0263158				0.134487	0.134487	0.00656025	0.0471032
SRSF1_K562	ZNF384	10	12:6781516-6781698	9:11	0.186047	0.313725	0.157143	0.0740741				0.134278	0.134278	0.00379893	0.0308642
SRSF1_K562	PAQR3	2	4:79856275-79856437	1:3	0.967213	0.823529	0.816327	0.705882				0.134267	0.134267	0.0040059	0.0322058
SRSF1_K562	UBA6	12	4:68528857-68528933	11:13	0.918919	0.8	1	0.987421				-0.134251	0.134251	1.06661e-09	5.00142e-08
SRSF1_K562	DNAJC8	2	1:28556642-28556763	1:3	0.162857	0.236749	0.0736278	0.0580552				0.133962	0.133962	0	0
SRSF1_K562	CDC25C	4	5:137665242-137665336	3:5	0.985915	1	0.87931	0.83871				0.133948	0.133948	3.91798e-10	1.99958e-08
SRSF1_K562	ZNF562	3	19:9770055-9770143	2:4	0.857143	0.875	1	1				-0.133929	0.133929	0.00187999	0.0178026
SRSF1_K562	DRAM2	2	1:111682123-111682333	1:3	0.563636	0.527778	0.7	0.65873				-0.133658	0.133658	0.00246085	0.0220593
SRSF1_K562	LARS	20	5:145522435-145522647	19:21	0.866953	0.860697	0.994937	1				-0.133644	0.133644	0	0
SRSF1_K562	LAS1L	9	X:64744444-64744494	8:10	0.437956	0.402174	0.313333	0.259542				0.133627	0.133627	0.00137079	0.0138465
SRSF1_K562	SURF2	4	9:136226826-136227005	3:5	0.758242	0.87931	0.904762	1				-0.133605	0.133605	0.00610733	0.0446156
SRSF1_K562	TTC7A	11	2:47221496-47221653	10:12	0.733333	1	1	1				-0.133333	0.133333	0.0034464	0.0285526
SRSF1_K562	PSMG1	4	21:40551850-40551912	3:5	0.944444	0.952278	0.812195	0.818182				0.133173	0.133173	0	0
SRSF1_K562	RNF181	3	2:85823945-85824054	2:4	0.825581	0.839286	0.981447	0.949339				-0.13296	0.13296	1.63292e-12	1.10912e-10
SRSF1_K562	CLK2	5	1:155238499-155238586	4:6	0.785714	0.88	0.983051	0.948276				-0.132806	0.132806	0.00213914	0.0197111
SRSF1_K562	C2orf43	2	2:21001052-21001225	1:3	0.838384	0.861702	0.990385	0.975309				-0.132804	0.132804	6.42632e-07	1.84072e-05
SRSF1_K562	CHD9	39	16:53348735-53348956	38:40	0.919355	0.816327	1	1				-0.132159	0.132159	2.78163e-06	6.70895e-05
SRSF1_K562	DNM2	13	19:10908056-10908194	12:14	0.255814	0.319672	0.16962	0.141566				0.13215	0.13215	0.000294369	0.00389296
SRSF1_K562	SLC41A1	7	1:205767797-205767943	6:8	0.833333	0.902439	1	1				-0.132114	0.132114	0.00279483	0.0242871
SRSF1_K562	GOLT1B	3	12:21660878-21661043	2:4	0.171429	0.133333	0.0227273	0.0178571				0.132089	0.132089	0.00141265	0.0141918
SRSF1_K562	KIAA1712	11	4:175237681-175237718	10:12	1	0.971831	0.883495	0.824742				0.131797	0.131797	7.02921e-07	1.99179e-05
SRSF1_K562	PPP1R12A	16	12:80199372-80199548	15:17	0.852941	0.856	0.979798	0.99187				-0.131363	0.131363	7.74452e-09	3.15154e-07
SRSF1_K562	SAPS2	10	22:50857296-50857408	9:11	0.833333	0.833333	0.928571	1				-0.130952	0.130952	0.00182571	0.0174496
SRSF1_K562	ENOX2	7	X:129813516-129813722	6:8	0.875	0.863636	1	1				-0.130682	0.130682	0.000593508	0.00700643
SRSF1_K562	APLP2	8	11:129993507-129993674	7:9	0.524752	0.57072	0.424658	0.409692				0.130561	0.130561	3.70334e-08	1.36022e-06
SRSF1_K562	PIGN	12	18:59807653-59807712	11:13	0.966667	1	0.836066	0.869565				0.130518	0.130518	0.00656258	0.0471032
SRSF1_K562	ALDH6A1	10	14:74531884-74532063	9:11	0.73913	1	1	1				-0.130435	0.130435	0.000831694	0.0093181
SRSF1_K562	EZH2	12	7:148516070-148516151	11:13	0.0172043	0.0205656	0.10559	0.193038				-0.130429	0.130429	0	0
SRSF1_K562	RPUSD3	2	3:9885149-9885285	1:3	0.833333	0.80597	0.95	0.95				-0.130348	0.130348	0.00243946	0.02191
SRSF1_K562	BAT3	13	6:31612086-31612191	12:14	0.543478	0.533597	0.387879	0.428571				0.130312	0.130312	0.000272756	0.00365687
SRSF1_K562	MITD1	4	2:99787806-99787892	3:5	0.968421	0.978022	0.902778	0.783133				0.130266	0.130266	5.64928e-06	0.000125295
SRSF1_K562	CD3D	2	11:118211090-118211308	1:3	0.888889	0.828571	0.992908	0.984962				-0.130205	0.130205	2.24375e-06	5.52712e-05
SRSF1_K562	STAU1	5	20:47782534-47782822	4:6	0.278146	0.202703	0.108911	0.111607				0.130165	0.130165	7.13512e-06	0.000153638
SRSF1_K562	MEF2C	7	5:88056805-88056942	6:8	0.153846	0.135135	0.00990099	0.02				0.12954	0.12954	1.71358e-05	0.000342252
SRSF1_K562	ATXN3	2	14:92563015-92563182	1:3	0.93617	0.75	0.971831	0.972973				-0.129317	0.129317	0.000140202	0.00207052
SRSF1_K562	GTF2IRD1	20	7:73969723-73969824	19:21	0.891892	0.85	1	1				-0.129054	0.129054	0.000547343	0.00656633
SRSF1_K562	ESYT1	14	12:56527864-56527965	13:15	0.895616	0.841975	1	0.995633				-0.129021	0.129021	0	0
SRSF1_K562	SDCCAG1	35	14:50251810-50251853	34:36	0.85	0.847222	0.955224	1				-0.129001	0.129001	1.05929e-05	0.000220387
SRSF1_K562	MORN4	4	10:99379344-99379440	2:5	0.9375	0.75	0.945455	1				-0.128977	0.128977	0.00313596	0.0264915
SRSF1_K562	WDR85	11	9:140459345-140459410	10:12	0.830986	0.786885	0.914286	0.961538				-0.128977	0.128977	0.00312068	0.0264349
SRSF1_K562	BCL2L12	3	19:50170276-50170418	2:4	0.626923	0.728346	0.835366	0.777778				-0.128937	0.128937	0.00658782	0.0472536
SRSF1_K562	HEPH	18	X:65475947-65476172	17:19	0.791209	0.851351	0.93007	0.969231				-0.12837	0.12837	3.44408e-05	0.000625657
SRSF1_K562	TACC3	4	4:1729435-1730514	3:5	0.879433	0.833333	0.994924	0.973958				-0.128058	0.128058	1.6287e-13	1.2332e-11
SRSF1_K562	CEP152	22	15:49040640-49040807	21:23	0.803571	0.864865	0.976744	0.946809				-0.127558	0.127558	0.000613808	0.00720921
SRSF1_K562	ELL	2	19:18586624-18586743	1:3	0.189655	0.0652174	0	0				0.127436	0.127436	0.00298524	0.0255927
SRSF1_K562	CENPE	34	4:104064405-104064563	33:35	0.77451	0.84	0.926471	0.942308				-0.127134	0.127134	3.78867e-05	0.000680892
SRSF1_K562	CLN3	16	16:28490965-28491086	15:18	0	0	0.111111	0.142857				-0.126984	0.126984	0.00230953	0.0209777
SRSF1_K562	DDX54	13	12:113603607-113603837	12:14	0.83908	0.907216	1	1				-0.126852	0.126852	0.000408465	0.00511273
SRSF1_K562	UBE2W	2	8:74782504-74782536	1:3	0.114286	0.196429	0.0571429	0				0.126786	0.126786	0.0013869	0.013971
SRSF1_K562	GFM2	18	5:74026085-74026223	17:19	0.80303	0.785714	0.916168	0.925743				-0.126583	0.126583	0.000329601	0.00426726
SRSF1_K562	PRMT3	7	11:20419123-20419267	6:8	0.8	0.930233	1	0.982906				-0.126337	0.126337	4.06305e-05	0.000719702
SRSF1_K562	FAM134C	4	17:40739852-40739882	3:5	0.973684	0.984127	0.753623	0.951613				0.126288	0.126288	4.4228e-05	0.000775249
SRSF1_K562	PHF20	11	20:34458877-34459056	10:12	0.833333	0.914286	1	1				-0.12619	0.12619	5.3199e-06	0.000119133
SRSF1_K562	PEMT	6	17:17415823-17415968	5:7	0.954545	0.793103	1	1				-0.126176	0.126176	0.000800565	0.00902407
SRSF1_K562	DNAJA3	11	16:4504812-4504928	10:12	0.265306	0.220238	0.342342	0.395062				-0.12593	0.12593	0.00301856	0.0258304
SRSF1_K562	RPRD2	12	1:150437003-150437203	11:13	0.842105	0.90625	1	1				-0.125822	0.125822	0.000799104	0.00901309
SRSF1_K562	DLGAP5	19	14:55615312-55615402	18:20	0.068	0.0769231	0.185654	0.20979				-0.125261	0.125261	6.15936e-09	2.55755e-07
SRSF1_K562	AKAP8	9	19:15479878-15480035	8:10	0.0310559	0.00819672	0.16092	0.128205				-0.124936	0.124936	4.56952e-07	1.36384e-05
SRSF1_K562	GFI1B	9	9:135864448-135864585	8:10	0.841584	0.909091	1	1				-0.124662	0.124662	0.000239616	0.00326227
SRSF1_K562	AF205589.2	10	8:145638621-145638773	9:11	0.881356	0.796875	0.966102	0.960784				-0.124328	0.124328	0.00116841	0.0122095
SRSF1_K562	NUP188	3	9:131710296-131710907	2:4	0.150602	0.14557	0.0232558	0.0243902				0.124263	0.124263	3.09085e-06	7.36819e-05
SRSF1_K562	ZCCHC17	4	1:31791014-31791083	3:5	0.317568	0.194631	0.107692	0.156463				0.124022	0.124022	0.000456373	0.00564787
SRSF1_K562	C3orf75	7	3:47539435-47539922	6:9	0.888889	0.822785	0.979592	0.98				-0.123959	0.123959	6.10496e-06	0.000134113
SRSF1_K562	RIPK1	5	6:3081213-3081350	4:7	0.823529	0.928571	1	1				-0.12395	0.12395	0.000425848	0.00529801
SRSF1_K562	NCKIPSD	10	3:48716488-48716616	9:11	0.863636	0.888889	1	1				-0.123737	0.123737	0.000569114	0.0067791
SRSF1_K562	STX5	3	11:62598491-62598734	2:4	0.87931	0.873239	1	1				-0.123725	0.123725	3.59642e-05	0.000649452
SRSF1_K562	SKA2	2	17:57208642-57208728	1:3	0.824074	0.800926	0.946939	0.92549				-0.123714	0.123714	7.35967e-09	3.01485e-07
SRSF1_K562	EDEM2	11	20:33706401-33706522	10:12	0.913043	0.84	1	1				-0.123478	0.123478	0.00154191	0.0153229
SRSF1_K562	TRIM33	6	1:114973420-114973534	5:7	0.979592	1	0.86747	0.865169				0.123477	0.123477	5.37482e-07	1.57619e-05
SRSF1_K562	ACADVL	5	17:7123783-7123848	4:6	0.888199	0.851562	0.994286	0.992366				-0.123445	0.123445	3.93613e-11	2.25409e-09
SRSF1_K562	SMAD2	4	18:45396846-45396935	3:5	0.755102	0.888889	0.9875	0.902778				-0.123143	0.123143	0.00258469	0.0228917
SRSF1_K562	EIF4A2	11	3:186506099-186506205	10:12	0.224927	0.192735	0.0901786	0.0814053				0.123039	0.123039	1.19328e-09	5.51148e-08
SRSF1_K562	TMEM219	6	16:29983363-29983461	5:7	0.211268	0.15873	0.0357143	0.0882353				0.123024	0.123024	0.000396618	0.00498471
SRSF1_K562	SUZ12	4	17:30274636-30274704	3:5	0.906977	0.908333	0.813725	0.755556				0.123015	0.123015	0.000276547	0.0036943
SRSF1_K562	MBOAT7	6	19:54684490-54684850	5:7	0.889908	0.864865	1	1				-0.122613	0.122613	0.000164503	0.00236329
SRSF1_K562	NUMB	4	14:73783098-73783130	3:5	0.170455	0.278481	0.122951	0.0808081				0.122588	0.122588	0.00131611	0.0134561
SRSF1_K562	CKAP2	4	13:53035031-53035109	3:5	0.781065	0.884058	0.962406	0.947761				-0.122522	0.122522	1.19554e-06	3.17383e-05
SRSF1_K562	RAB1A	4	2:65318117-65318212	3:5	0.859779	0.849576	0.962138	0.992095				-0.122439	0.122439	0	0
SRSF1_K562	PSTK	5	10:124745645-124745891	3:6	0.911765	0.84375	1	1				-0.122243	0.122243	0.000587041	0.0069434
SRSF1_K562	IDS	6	X:148584842-148585019	5:7	0.870968	0.884615	1	1				-0.122208	0.122208	0.00119142	0.0124078
SRSF1_K562	PRKCD	18	3:53223074-53223262	17:19	0.877551	0.878049	1	1				-0.1222	0.1222	0.00021848	0.00301676
SRSF1_K562	SUPV3L1	2	10:70942276-70942410	1:3	0.198113	0.229885	0.131579	0.0520833				0.122168	0.122168	0.000926866	0.0101928
SRSF1_K562	CCNT1	7	12:49089782-49089945	6:8	0.772152	0.885246	0.955224	0.946429				-0.122127	0.122127	0.000850179	0.0094735
SRSF1_K562	FGFR3	8	4:1804641-1804791	7:9	0.172414	0.0714286	0	0				0.121921	0.121921	0.00295352	0.0253915
SRSF1_K562	PSMG4	5	6:3264443-3264559	4:6	0.303965	0.252688	0.177632	0.136054				0.121483	0.121483	0.000158102	0.00228735
SRSF1_K562	GOLGA4	5	3:37315027-37315092	4:6	0.989691	0.954545	0.890244	0.811594				0.121199	0.121199	5.05179e-05	0.000867396
SRSF1_K562	EIF4A2	4	3:186502751-186502890	3:5	0.664859	0.662546	0.764881	0.804511				-0.120993	0.120993	1.11022e-16	1.17881e-14
SRSF1_K562	PPP1R7	2	2:242092891-242093019	1:3	0.969112	0.931159	0.855372	0.803419				0.12074	0.12074	6.72716e-10	3.27064e-08
SRSF1_K562	EXOSC3	3	9:37781983-37782134	2:4	0.784483	0.872549	0.947368	0.951111				-0.120724	0.120724	1.39312e-08	5.48783e-07
SRSF1_K562	BRD8	21	5:137495244-137495288	20:22	0.62215	0.616114	0.493927	0.503546				0.120395	0.120395	9.04552e-05	0.00142226
SRSF1_K562	CEP350	4	1:179959642-179959756	3:5	0.976744	1	0.805556	0.931034				0.120077	0.120077	0.00345664	0.0286117
SRSF1_K562	ZFYVE20	5	3:15131906-15132046	4:6	0.8	0.96	1	1				-0.12	0.12	0.000954655	0.0104301
SRSF1_K562	GPBP1	4	5:56517203-56517223	3:5	0.26	0.234513	0.107477	0.147368				0.119834	0.119834	2.20194e-06	5.43861e-05
SRSF1_K562	TFDP1	13	13:114291935-114292211	12:14	0.773504	0.764259	0.938202	0.839161				-0.1198	0.1198	0.00649512	0.0466734
SRSF1_K562	NARG2	2	15:60770767-60771128	1:3	0.0714286	0.0769231	0.22449	0.163043				-0.119591	0.119591	5.57274e-05	0.000942759
SRSF1_K562	MCM6	13	2:136608972-136609133	12:14	0.880952	0.880096	1	1				-0.119476	0.119476	0	0
SRSF1_K562	TARBP2	4	12:53896811-53896996	3:5	0.857143	0.855263	1	0.95122				-0.119407	0.119407	0.00197639	0.0185277
SRSF1_K562	DULLARD	7	17:7149345-7149456	6:8	0.900356	0.837037	0.988636	0.987179				-0.119211	0.119211	9.99201e-16	9.9785e-14
SRSF1_K562	KTN1	36	14:56130673-56130759	35:37	0.23741	0.25641	0.376147	0.355856				-0.119091	0.119091	0.00099367	0.0107672
SRSF1_K562	RBM6	42	3:50147812-50147896	41:43	0.873418	0.915254	0.777778	0.772727				0.119083	0.119083	0.00350093	0.028862
SRSF1_K562	RBM5	17	3:50147812-50147896	16:18	0.873418	0.915254	0.777778	0.772727				0.119083	0.119083	0.00350093	0.028862
SRSF1_K562	HPS5	3	11:18333461-18333571	2:4	0.761905	1	1	1				-0.119048	0.119048	0.00535952	0.040267
SRSF1_K562	BTF3L4	4	1:52549012-52549213	3:5	0.901538	0.881226	0.783505	0.761229				0.119015	0.119015	3.307e-09	1.43757e-07
SRSF1_K562	DVL3	5	3:183882280-183882389	4:6	0.871429	0.875	0.984375	1				-0.118973	0.118973	9.26149e-05	0.0014471
SRSF1_K562	KRR1	5	12:75900096-75900179	4:6	0.870588	0.891892	1	1				-0.11876	0.11876	7.20021e-10	3.47321e-08
SRSF1_K562	GLIPR1	10	12:75900096-75900179	9:11	0.870588	0.891892	1	1				-0.11876	0.11876	7.20021e-10	3.47321e-08
SRSF1_K562	RAD1	5	5:34913575-34913683	4:6	0.671429	0.685714	0.785714	0.808824				-0.118697	0.118697	0.00296222	0.0254426
SRSF1_K562	KBTBD3	3	11:105929592-105929836	2:4	0.944444	0.818182	1	1				-0.118687	0.118687	0.00449265	0.0351437
SRSF1_K562	SLC29A2	9	11:66133902-66134035	8:10	0.779661	0.907692	0.965812	0.958333				-0.118396	0.118396	0.000299189	0.00394823
SRSF1_K562	ANKHD1	33	5:139914947-139915123	30:34	0.778723	0.811224	0.954082	0.872549				-0.118341	0.118341	1.5562e-06	3.98763e-05
SRSF1_K562	MBD1	8	18:47802205-47802351	7:9	0.823529	0.86	0.92	1				-0.118235	0.118235	0.00535481	0.0402646
SRSF1_K562	CFLAR	6	2:202000921-202004600	5:7	0.178295	0.208791	0.0658683	0.0855615				0.117828	0.117828	5.7477e-05	0.00096711
SRSF1_K562	SREBF2	10	22:42274663-42274762	9:11	0.0857143	0.0240964	0.198198	0.146552				-0.11747	0.11747	9.76872e-05	0.00151661
SRSF1_K562	CEP72	5	5:633884-634062	4:6	0.918919	0.846154	1	1				-0.117464	0.117464	0.00129162	0.013235
SRSF1_K562	CTD-2260A17.2	14	5:96124234-96124388	13:15	0.88	0.794872	0.969231	0.940299				-0.117329	0.117329	0.00265948	0.0233971
SRSF1_K562	ERAP1	12	5:96124234-96124388	11:13	0.88	0.794872	0.969231	0.940299				-0.117329	0.117329	0.00265948	0.0233971
SRSF1_K562	SLC6A6	10	3:14509596-14509720	9:11	0.779661	0.85567	0.930556	0.939024				-0.117124	0.117124	4.76382e-05	0.000825624
SRSF1_K562	DBT	10	1:100672001-100672192	9:11	0.852941	0.913043	1	1				-0.117008	0.117008	0.000417572	0.005214
SRSF1_K562	C17orf53	7	17:42232221-42232306	6:8	1	1	1	0.766667				0.116667	0.116667	0.00226322	0.0206077
SRSF1_K562	AMMECR1	4	X:109507717-109507827	3:5	0.769231	0.941176	1	0.943662				-0.116627	0.116627	0.00246729	0.0221063
SRSF1_K562	POLL	7	10:103343265-103343438	6:8	0.862069	0.904762	1	1				-0.116585	0.116585	0.00282713	0.0244528
SRSF1_K562	ANKRD17	16	4:74005248-74006000	15:17	0.442529	0.391608	0.510791	0.556391				-0.116523	0.116523	0.00515199	0.0390094
SRSF1_K562	NCAPG2	20	7:158454886-158455059	19:21	0.928571	0.821138	0.985549	0.997183				-0.116511	0.116511	2.4869e-14	2.07898e-12
SRSF1_K562	CEP110	16	9:123898084-123898260	15:17	1	0.976744	0.888889	0.854839				0.116508	0.116508	0.000125032	0.0018765
SRSF1_K562	KTN1	48	14:56147404-56147459	47:49	0.119205	0.153153	0.0355556	0.00403226				0.116385	0.116385	3.86763e-10	1.97935e-08
SRSF1_K562	AARSD1	18	17:41105741-41105795	17:19	0.963855	0.909091	0.896552	0.744				0.116197	0.116197	0.000899647	0.00992297
SRSF1_K562	EED	10	11:85981125-85981199	9:11	0.168182	0.14881	0.0364964	0.0481283				0.116183	0.116183	3.36658e-07	1.03147e-05
SRSF1_K562	NCAPG2	7	7:158483260-158483414	6:8	0.883562	0.877551	0.996154	0.996825				-0.115933	0.115933	1.4877e-14	1.26079e-12
SRSF1_K562	NMRAL1	3	16:4524094-4524167	2:4	0.885714	0.862069	0.979592	1				-0.115904	0.115904	0.00336551	0.0280586
SRSF1_K562	ACOT9	6	X:23752458-23752484	5:7	0.712121	0.752212	0.59854	0.634146				0.115824	0.115824	0.00547358	0.0409909
SRSF1_K562	ITM2A	2	X:78618920-78619051	1:3	0.842365	0.841772	0.972028	0.94375				-0.115821	0.115821	1.09431e-06	2.94714e-05
SRSF1_K562	GCC2	7	2:109086107-109088572	6:8	0.915254	0.833333	0.979592	1				-0.115502	0.115502	0.000156932	0.00227397
SRSF1_K562	ZNF638	3	2:71575557-71577401	2:4	0.857143	0.827586	0.71028	0.743902				0.115273	0.115273	0.00672491	0.0479987
SRSF1_K562	RILP	7	17:1550200-1550283	6:8	0.916667	0.831325	0.977778	1				-0.114893	0.114893	5.53036e-06	0.000123249
SRSF1_K562	C13orf27	5	13:103419623-103419828	4:6	0.892562	0.922222	0.794118	0.790909				0.114879	0.114879	0.000919376	0.0101285
SRSF1_K562	EIF6	4	20:33868457-33868632	3:5	0.768392	0.777494	0.895425	0.880165				-0.114852	0.114852	0.000349078	0.00447863
SRSF1_K562	GALNT7	2	4:174169131-174169591	1:3	0.928571	0.842105	1	1				-0.114662	0.114662	0.000151898	0.00220797
SRSF1_K562	FANCB	2	X:14887045-14887165	1:3	1	0.973684	0.911111	0.833333				0.11462	0.11462	0.00113604	0.0119797
SRSF1_K562	PPRC1	3	10:103898376-103898522	2:4	0.875	0.895833	1	1				-0.114583	0.114583	0.00168326	0.0163417
SRSF1_K562	CALU	5	7:128394583-128394776	4:6	0.19536	0.20082	0.0850547	0.0823529				0.114386	0.114386	0	0
SRSF1_K562	GOLGA4	23	3:37378634-37378654	22:24	0.824561	0.843137	0.965066	0.93133				-0.114349	0.114349	1.2145e-08	4.83573e-07
SRSF1_K562	TUBE1	4	6:112405392-112405449	3:5	1	1	0.886076	0.885714				0.114105	0.114105	5.57746e-05	0.000942759
SRSF1_K562	CENPP	4	9:95107981-95108069	3:5	0.851852	0.92	1	1				-0.114074	0.114074	0.00156673	0.015454
SRSF1_K562	TNNT1	7	19:55653225-55653288	6:8	0.9	0.871866	1	1				-0.114067	0.114067	2.83329e-13	2.0938e-11
SRSF1_K562	PKN3	15	9:131477648-131477739	14:16	0.846154	0.886792	0.988764	0.972222				-0.11402	0.11402	6.06439e-05	0.00101393
SRSF1_K562	ZNF33A	2	10:38301226-38301278	1:3	0.865854	0.9375	0.731707	0.844037				0.113805	0.113805	0.00251568	0.0224528
SRSF1_K562	ZNF326	5	1:90472904-90473309	4:6	0.975	1	0.95082	0.796875				0.113653	0.113653	0.00115506	0.0121296
SRSF1_K562	DMXL2	42	15:51743842-51743894	41:43	0.770642	0.753846	0.881188	0.870588				-0.113644	0.113644	0.0051829	0.0391792
SRSF1_K562	BCL7B	4	7:72957878-72957974	3:5	0.96347	0.953757	0.838095	0.851852				0.11364	0.11364	1.39712e-06	3.64059e-05
SRSF1_K562	LPCAT2	5	16:55565826-55565886	4:6	1	1	0.939394	0.833333				0.113636	0.113636	0.00378328	0.0307777
SRSF1_K562	ALAS1	9	3:52242099-52242267	8:10	0.873333	0.886364	0.986842	1				-0.113573	0.113573	9.88236e-07	2.70484e-05
SRSF1_K562	KDM5B	7	1:202735525-202735632	6:8	0.147436	0.155556	0.0367647	0.0393701				0.113428	0.113428	4.02016e-06	9.2609e-05
SRSF1_K562	MATR3	9	5:138642928-138644016	8:10	0.798732	0.762774	0.887584	0.900709				-0.113394	0.113394	9.65894e-15	8.45729e-13
SRSF1_K562	SEPHS1	3	10:13386758-13387028	1:4	0.851852	0.833333	0.934783	0.976744				-0.113171	0.113171	0.000176281	0.00250908
SRSF1_K562	DSN1	2	20:35399828-35399876	1:3	0.831776	0.793103	0.622222	0.776316				0.113171	0.113171	0.00618624	0.0449433
SRSF1_K562	SCMH1	6	1:41625397-41625605	5:7	1	1	0.928571	0.846154				0.112637	0.112637	0.00446528	0.0350487
SRSF1_K562	HNRNPA2B1	2	7:26237451-26237486	1:3	0.0606749	0.0624303	0.169946	0.178046				-0.112443	0.112443	0	0
SRSF1_K562	PRDX4	4	X:23697282-23697404	3:5	0.854749	0.90493	0.995	0.989451				-0.112387	0.112387	0	0
SRSF1_K562	SFXN4	15	10:120901765-120901885	14:16	0.133333	0.153846	0.00724638	0.0555556				0.112189	0.112189	6.32624e-05	0.00105295
SRSF1_K562	IFRD2	4	3:50327819-50327903	3:5	0.949153	0.80303	0.97619	1				-0.112004	0.112004	0.00105981	0.011331
SRSF1_K562	DHRS11	3	17:34951401-34951610	2:4	0.97619	0.8	1	1				-0.111905	0.111905	2.0098e-06	5.03814e-05
SRSF1_K562	SNX14	19	6:86248556-86248582	18:20	0.163717	0.155556	0.0539216	0.041841				0.111755	0.111755	4.20928e-08	1.53689e-06
SRSF1_K562	UFC1	5	1:161127911-161128001	4:6	0.797101	0.862876	0.954268	0.929114				-0.111702	0.111702	7.36353e-11	4.05204e-09
SRSF1_K562	ADCY7	18	16:50342578-50342703	17:19	0.916667	0.86	1	1				-0.111667	0.111667	0.000512228	0.0062506
SRSF1_K562	MCM3AP	20	21:47671443-47671596	19:22	0.869048	0.907692	1	1				-0.11163	0.11163	1.62633e-07	5.42355e-06
SRSF1_K562	INPPL1	7	11:71940707-71940796	6:8	0.936508	0.823009	0.991379	0.991304				-0.111583	0.111583	9.51501e-08	3.31679e-06
SRSF1_K562	OMA1	5	1:58999625-58999732	4:6	0.92	0.857143	1	1				-0.111429	0.111429	0.000300116	0.00395481
SRSF1_K562	ZC3H18	4	16:88653950-88654021	3:5	0.325967	0.268657	0.163265	0.208696				0.111331	0.111331	0.00163946	0.0160259
SRSF1_K562	ASH2L	2	8:37963349-37963657	1:3	0.69086	0.669643	0.809061	0.773852				-0.111205	0.111205	5.15561e-06	0.000115735
SRSF1_K562	CNOT2	10	12:70726547-70726626	9:11	0.861111	0.916667	1	1				-0.111111	0.111111	1.16215e-05	0.000240434
SRSF1_K562	POLK	4	5:74842835-74842982	3:5	1	0.777778	1	1				-0.111111	0.111111	0.00687119	0.0487876
SRSF1_K562	ECD	2	10:74923491-74923708	1:3	0.930108	0.951515	0.852564	0.807407				0.110826	0.110826	7.10507e-06	0.000153348
SRSF1_K562	DHX29	24	5:54558458-54558760	23:25	0.87234	0.90625	1	1				-0.110705	0.110705	6.89275e-07	1.95612e-05
SRSF1_K562	CENPM	5	22:42339614-42339705	4:7	0.87234	0.90625	1	1				-0.110705	0.110705	0.00176243	0.0169677
SRSF1_K562	STK40	2	1:36833449-36833685	1:3	0.105263	0.0576923	0.205128	0.178947				-0.11056	0.11056	0.000556902	0.0066594
SRSF1_K562	PTAR1	2	9:72365697-72365866	1:3	1	1	0.912281	0.866667				0.110526	0.110526	8.40104e-06	0.000177585
SRSF1_K562	ENTPD5	11	14:74442639-74442718	10:12	1	1	0.914286	0.864865				0.110425	0.110425	0.00423654	0.033708
SRSF1_K562	ERI1	7	8:8887302-8887591	6:8	0.851852	0.857143	0.959184	0.970588				-0.110389	0.110389	0.00687998	0.0488026
SRSF1_K562	DEPDC1B	11	5:59894902-59895087	10:12	0.871951	0.85625	0.970238	0.978723				-0.11038	0.11038	3.97259e-08	1.45622e-06
SRSF1_K562	GUF1	15	4:44697632-44697751	14:16	0.897727	0.855263	0.973451	1				-0.11023	0.11023	2.69867e-06	6.52592e-05
SRSF1_K562	ZCCHC10	4	5:132335824-132335865	3:5	0.954887	0.963855	0.890625	0.807692				0.110213	0.110213	0.000218157	0.00301455
SRSF1_K562	LASS5	13	12:50526745-50527851	12:14	0	0.0517241	0.0769231	0.195122				-0.11016	0.11016	0.00269426	0.0236355
SRSF1_K562	YTHDF2	4	1:29068915-29070498	3:5	0.826797	0.846154	0.930736	0.9625				-0.110142	0.110142	1.02173e-08	4.09469e-07
SRSF1_K562	SPEN	14	1:16265213-16265371	13:15	0.95122	0.828571	1	1				-0.110105	0.110105	6.43282e-05	0.0010678
SRSF1_K562	MANBA	16	4:103557022-103557164	15:17	0.827586	0.952381	1	1				-0.110016	0.110016	0.000562586	0.00670999
SRSF1_K562	METTL3	6	14:21968637-21968824	5:7	0.837838	0.91	0.97541	0.992248				-0.10991	0.10991	8.052e-07	2.24375e-05
SRSF1_K562	TARBP2	8	12:53898919-53899046	7:9	0.833333	0.925373	0.978261	1				-0.109777	0.109777	0.00140076	0.0140953
SRSF1_K562	DNMT1	5	19:10290863-10290910	4:6	0.228571	0.183486	0.326087	0.305263				-0.109646	0.109646	0.000312509	0.00408317
SRSF1_K562	CYB5A	4	18:71924065-71924088	3:5	0.125	0.125	0.0307692	0				0.109615	0.109615	0.00136695	0.0138159
SRSF1_K562	MRPL2	6	6:43023283-43023356	5:7	0.972103	0.964029	0.853994	0.863014				0.109562	0.109562	1.9984e-15	1.94318e-13
SRSF1_K562	FKBP15	9	9:115959212-115959358	8:10	0.78125	1	1	1				-0.109375	0.109375	0.00204871	0.0190296
SRSF1_K562	ASPH	11	8:62559309-62559437	10:12	0.804734	0.849206	0.93985	0.932331				-0.10912	0.10912	6.08391e-05	0.00101628
SRSF1_K562	ZNF384	8	12:6786333-6786425	7:9	0	0	0.117647	0.1				-0.108824	0.108824	6.63955e-06	0.000144196
SRSF1_K562	MTO1	4	6:74183088-74183377	3:5	0.891304	0.851064	0.979381	0.980392				-0.108703	0.108703	0.000129311	0.00193286
SRSF1_K562	HECTD1	27	14:31597818-31598654	26:28	0.907216	0.839506	0.975309	0.988764				-0.108675	0.108675	5.82161e-05	0.000977766
SRSF1_K562	PUM2	6	2:20511255-20511424	5:7	0.895349	0.785714	0.922222	0.97619				-0.108675	0.108675	0.0019723	0.018506
SRSF1_K562	KLHL23	7	2:170591523-170592737	6:8	0.870968	0.911765	1	1				-0.108634	0.108634	0.00143052	0.0143557
SRSF1_K562	PPHLN1	3	12:42726462-42726504	1:4	0.173267	0.244444	0.312102	0.322785				-0.108587	0.108587	0.00143621	0.014405
SRSF1_K562	RAB11FIP1	7	8:37728796-37730697	6:8	0.167785	0.128571	0.330986	0.181818				-0.108224	0.108224	0.00116186	0.0121648
SRSF1_K562	DDX42	6	17:61876949-61876985	5:7	0.954955	0.969231	0.892405	0.815603				0.108089	0.108089	3.51569e-08	1.29387e-06
SRSF1_K562	IFT122	20	3:129210984-129211037	19:21	0.977778	1	0.941176	0.820513				0.108044	0.108044	0.00422729	0.0336634
SRSF1_K562	CRELD2	9	22:50318008-50318103	8:10	0.857143	0.926829	1	1				-0.108014	0.108014	0.0033415	0.027871
SRSF1_K562	CDYL	11	6:4952500-4952643	10:12	0.884615	0.9	1	1				-0.107692	0.107692	4.40773e-05	0.000773342
SRSF1_K562	ZNF192	4	6:28116094-28116616	3:5	0.891892	0.892857	1	1				-0.107625	0.107625	0.000794245	0.00898571
SRSF1_K562	NCAPG2	28	7:158443524-158443664	27:29	0.937984	0.978723	0.841727	0.86				0.107491	0.107491	4.55083e-06	0.000103288
SRSF1_K562	AUP1	4	2:74755878-74756062	3:5	0.818653	0.823529	0.921053	0.936047				-0.107458	0.107458	1.51442e-05	0.00030549
SRSF1_K562	UBR3	21	2:170802798-170802902	20:22	0.885246	0.9	1	1				-0.107377	0.107377	1.57971e-05	0.000317574
SRSF1_K562	PICALM	14	11:85701293-85701442	13:15	0.245802	0.192101	0.337056	0.315436				-0.107295	0.107295	3.94085e-11	2.25409e-09
SRSF1_K562	CCNK	6	14:99967693-99967750	5:7	0.866197	0.885714	0.985294	0.981013				-0.107198	0.107198	3.87918e-07	1.17508e-05
SRSF1_K562	TUBD1	9	17:57941025-57941208	8:10	0.785714	1	1	1				-0.107143	0.107143	0.000515418	0.00628075
SRSF1_K562	PLEKHA8	6	7:30090050-30090090	5:7	1	1	0.9	0.885714				0.107143	0.107143	0.00094938	0.010387
SRSF1_K562	KIF15	30	3:44881847-44881948	29:31	0.963855	0.802817	1	0.980952				-0.10714	0.10714	7.31036e-06	0.000157045
SRSF1_K562	TMOD1	4	9:100308467-100308623	3:5	0.835165	0.860759	0.963134	0.947059				-0.107134	0.107134	3.14122e-05	0.000577454
SRSF1_K562	RIOK3	7	18:21047363-21047490	6:8	0.798658	0.832298	0.916376	0.928571				-0.106996	0.106996	2.65667e-06	6.4412e-05
SRSF1_K562	C14orf106	4	14:45711237-45711721	3:5	0.864865	0.888889	0.967742	1				-0.106994	0.106994	0.00221952	0.0202898
SRSF1_K562	KDM4B	3	19:5032877-5033042	2:4	1	0.942857	0.854167	0.875				0.106845	0.106845	0.00449497	0.0351437
SRSF1_K562	ZEB2	9	2:145182363-145182434	8:10	0.948718	1	0.846154	0.888889				0.106838	0.106838	0.000402365	0.00504663
SRSF1_K562	VIPAR	20	14:77894713-77894817	19:21	0.886792	0.9	1	1				-0.106604	0.106604	5.07164e-05	0.000869996
SRSF1_K562	DPP7	8	9:140007197-140007257	7:9	0.898876	0.868132	1	0.98				-0.106496	0.106496	0.000124133	0.00186604
SRSF1_K562	COQ4	5	9:131089679-131094561	4:6	0.772727	1	0.985714	1				-0.106494	0.106494	0.00232055	0.0210505
SRSF1_K562	ANAPC10	5	4:145985724-145985844	4:6	0.977099	0.917431	0.789916	0.892308				0.106153	0.106153	0.000143774	0.00211483
SRSF1_K562	MAZ	6	16:29820861-29821092	5:7	0.508547	0.470588	0.315789	0.451777				0.105785	0.105785	0.00145897	0.0146016
SRSF1_K562	SNX15	7	11:64799640-64799675	6:8	0.885246	0.903226	1	1				-0.105764	0.105764	0.000348782	0.00447794
SRSF1_K562	ZNF800	4	7:127026114-127026234	3:5	0.948718	0.98	0.803571	0.913793				0.105677	0.105677	0.00413067	0.0329935
SRSF1_K562	ZC3H11A	2	1:203765421-203765729	1:3	0.579909	0.619048	0.726368	0.683938				-0.105675	0.105675	0.00172817	0.0167162
SRSF1_K562	BAT4	2	6:31632618-31632780	1:3	0.95122	0.8375	1	1				-0.10564	0.10564	2.40939e-06	5.89581e-05
SRSF1_K562	PCIF1	5	20:44569114-44569251	4:6	0.833333	0.904762	0.949153	1				-0.105529	0.105529	0.00489975	0.0376237
SRSF1_K562	GCN1L1	38	12:120585971-120586150	37:39	0.878981	0.903704	0.993506	1				-0.105411	0.105411	7.93925e-07	2.21567e-05
SRSF1_K562	DMXL2	19	15:51787221-51787331	18:20	1	1	0.948276	0.840909				0.105408	0.105408	4.53151e-05	0.000791302
SRSF1_K562	DMXL2	32	15:51756872-51757073	31:33	0.870588	0.910714	1	0.991935				-0.105316	0.105316	3.24475e-06	7.67563e-05
SRSF1_K562	PRR14	9	16:30665950-30666535	8:10	0.9125	0.830769	1	0.953488				-0.10511	0.10511	0.00301672	0.0258274
SRSF1_K562	MORF4L2	4	X:102939609-102939657	3:5	0.0626204	0.049711	0.168118	0.153914				-0.10485	0.10485	0	0
SRSF1_K562	CLSPN	2	1:36230819-36230927	1:3	0.80198	0.887324	0.972973	0.925926				-0.104797	0.104797	0.00155623	0.0153915
SRSF1_K562	ANAPC7	4	12:110826317-110826428	3:5	0.873239	0.844444	0.960591	0.966667				-0.104787	0.104787	3.51013e-06	8.22964e-05
SRSF1_K562	COQ6	8	14:74425674-74425781	7:9	0.885714	0.904762	1	1				-0.104762	0.104762	0.0042459	0.033768
SRSF1_K562	PRPF3	4	1:150300016-150300111	3:5	0.00790514	0.0044843	0.119048	0.102804				-0.104731	0.104731	4.61925e-11	2.60185e-09
SRSF1_K562	RAB23	4	6:57072426-57072511	3:5	0.869565	0.921053	1	1				-0.104691	0.104691	0.000670238	0.00775462
SRSF1_K562	SH3GL3	9	15:84278022-84278218	8:10	0.047619	0.0754717	0.177419	0.154762				-0.104545	0.104545	0.00665217	0.0476167
SRSF1_K562	CHAF1A	4	19:4418017-4418073	3:5	0.958333	0.971429	0.813559	0.907143				0.10453	0.10453	0.0004563	0.00564787
SRSF1_K562	POGZ	14	1:151380885-151381057	13:15	0.870968	0.92	1	1				-0.104516	0.104516	0.00513859	0.0389256
SRSF1_K562	RNASEN	33	5:31409353-31409439	32:34	0.904255	0.876543	0.989583	1				-0.104392	0.104392	2.06705e-06	5.15368e-05
SRSF1_K562	FCGR2A	5	1:161480624-161480746	4:6	0.821739	0.773399	0.930233	0.873469				-0.104282	0.104282	0.000511432	0.00624501
SRSF1_K562	ECT2	5	3:172473273-172473365	4:6	0.153226	0.138614	0.0531915	0.0306122				0.104018	0.104018	0.000332216	0.00429509
SRSF1_K562	RNF14	6	5:141354369-141354520	5:7	0.914062	0.849057	0.765823	0.790055				0.103621	0.103621	8.01802e-05	0.00128143
SRSF1_K562	NIPA2	3	15:23029840-23029966	2:4	0.0666667	0.0229885	0.196721	0.1				-0.103533	0.103533	0.00164261	0.0160398
SRSF1_K562	GPS2	6	17:7221588-7221675	5:7	1	0.793103	1	1				-0.103448	0.103448	0.00302454	0.0258345
SRSF1_K562	NEURL4	24	17:7221588-7221675	23:25	1	0.793103	1	1				-0.103448	0.103448	0.00302454	0.0258345
SRSF1_K562	KCTD20	3	6:36442566-36442839	2:4	0.861842	0.86036	0.958015	0.970833				-0.103323	0.103323	2.35857e-09	1.04999e-07
SRSF1_K562	DARS2	13	1:173819465-173819617	12:14	0.833333	0.818182	0.925676	0.932432				-0.103296	0.103296	0.00295836	0.0254212
SRSF1_K562	CCT7	9	2:73476119-73476307	8:10	0.885397	0.907367	1	0.999295				-0.103265	0.103265	0	0
SRSF1_K562	GAK	6	4:898425-898567	5:7	1	1	0.902439	0.891304				0.103128	0.103128	0.000309719	0.00405532
SRSF1_K562	C5orf22	9	5:31548597-31548794	8:10	0.15	0.137931	0.0394737	0.0425532				0.102952	0.102952	0.000723109	0.00827723
SRSF1_K562	ADAMTSL4	2	1:150522298-150522752	1:3	0.882353	0.911765	1	1				-0.102941	0.102941	7.79802e-05	0.00125386
SRSF1_K562	AGTRAP	3	1:11806184-11806280	2:4	0.0588235	0.0246914	0.160494	0.128571				-0.102775	0.102775	0.000948797	0.010387
SRSF1_K562	C3orf17	7	3:112729490-112729551	6:8	1	0.976744	0.882353	0.888889				0.102751	0.102751	0.000949589	0.010387
SRSF1_K562	WBP5	2	X:102612011-102612089	1:3	0.81713	0.738693	0.660377	0.69011				0.102668	0.102668	1.85514e-06	4.67581e-05
SRSF1_K562	KIF21B	13	1:200968477-200968594	12:14	0.794872	1	1	1				-0.102564	0.102564	0.0030981	0.0263282
SRSF1_K562	HNRNPH3	3	10:70097615-70097753	2:4	0.80756	0.859213	0.932783	0.939112				-0.102561	0.102561	0	0
SRSF1_K562	HPS4	7	22:26867179-26867354	6:8	0.0204082	0.0222222	0.101695	0.145455				-0.10226	0.10226	0.0031154	0.0264349
SRSF1_K562	PIGF	2	2:46842076-46842324	1:3	1	1	0.854369	0.941176				0.102227	0.102227	1.82923e-05	0.000359968
SRSF1_K562	DMXL2	31	15:51757763-51757848	30:32	0.868421	0.927273	1	1				-0.102153	0.102153	1.06492e-06	2.88482e-05
SRSF1_K562	DBNL	3	7:44091429-44091541	2:4	0.902439	0.893617	1	1				-0.101972	0.101972	0.000515732	0.00628075
SRSF1_K562	FLAD1	2	1:154956318-154956542	1:3	0.911765	0.858974	0.974359	1				-0.10181	0.10181	0.0020538	0.0190673
SRSF1_K562	PDS5B	34	13:33344792-33345016	33:35	0.983871	0.980769	0.863636	0.897436				0.101784	0.101784	0.00224325	0.0204662
SRSF1_K562	OGT	4	X:70764417-70764485	3:5	0.981308	0.943182	0.892086	0.828947				0.101728	0.101728	4.54007e-05	0.000792047
SRSF1_K562	BCOR	6	X:39930890-39930943	5:7	0.291429	0.308824	0.375	0.428571				-0.10166	0.10166	0.00588334	0.0433248
SRSF1_K562	CEP152	21	15:49044546-49044666	20:22	0.952381	0.844444	1	1				-0.101587	0.101587	6.97803e-06	0.000151136
SRSF1_K562	KIAA0494	11	1:47140833-47144308	10:12	0.926829	0.85	1	0.98				-0.101585	0.101585	0.000840823	0.00939759
SRSF1_K562	TXLNA	2	1:32645915-32646115	1:3	0.911765	0.945055	0.827586	0.826087				0.101573	0.101573	0.00490178	0.0376237
SRSF1_K562	SNAP23	6	15:42820460-42820618	5:7	0.836694	0.862319	0.960674	0.941476				-0.101569	0.101569	8.35698e-12	5.30568e-10
SRSF1_K562	GGA3	6	17:73240700-73240798	5:7	0.980198	1	0.875	0.902174				0.101512	0.101512	1.0382e-05	0.000216976
SRSF1_K562	PET112L	12	4:152593761-152594048	11:13	0.896552	0.851064	0.975	0.97561				-0.101497	0.101497	0.0064566	0.0464689
SRSF1_K562	STK25	4	2:242440893-242441123	3:5	0.910714	0.886364	1	1				-0.101461	0.101461	2.4575e-05	0.00046047
SRSF1_K562	ERCC2	3	19:45872328-45872405	2:4	0.957447	0.830189	0.990385	1				-0.101375	0.101375	2.88635e-06	6.93437e-05
SRSF1_K562	HP1BP3	6	1:21102149-21102498	5:7	0.216606	0.254237	0.138138	0.130435				0.101135	0.101135	2.42701e-05	0.000456609
SRSF1_K562	USP37	19	2:219344373-219344438	18:20	1	1	0.888889	0.909091				0.10101	0.10101	0.00338155	0.0281415
SRSF1_K562	TBC1D22A	16	22:47432966-47433094	15:17	0.875	0.923077	1	1				-0.100962	0.100962	0.00306783	0.0260829
SRSF1_K562	HELLS	7	10:96322569-96322633	6:8	0.928571	0.869565	1	1				-0.100932	0.100932	0.0070561	0.0495106
SRSF1_K562	PCM1	2	8:17782222-17782289	1:3	0.921739	0.906542	0.72973	0.897436				0.100558	0.100558	0.00439677	0.034625
SRSF1_K562	DHX35	19	20:37657061-37657142	18:20	0.884615	0.914286	1	1				-0.100549	0.100549	0.00190451	0.0180071
SRSF1_K562	ZNF266	11	19:9526330-9526418	10:12	0.931034	0.763636	0.944444	0.95122				-0.100497	0.100497	0.00427101	0.0338948
SRSF1_K562	CLPTM1L	9	5:1330395-1330498	8:10	0.852679	0.829412	0.964539	0.91791				-0.10018	0.10018	5.1114e-05	0.000875837
SRSF1_K562	PDK1	11	2:173433469-173433545	10:12	0.888235	0.949686	0.837563	0.8				0.100179	0.100179	1.85243e-05	0.000363695
SRSF1_K562	ATRIP	8	3:48501186-48501315	7:9	1	1	0.8	1				0.1	0.1	0.00197662	0.0185277
	gene_symbol	exon_skipped	coordonnees	exons_flanquants	psi_HepG2_SRSF1	psi_HepG2_SRSF1	psi_HepG2_PTBP1	psi_HepG2_PTBP1				deltaPSI	valeur abs deltaPSI	pvalue_glm	pvalue_corrigee_glm
SRSF1_HepG2	GANC	5	15:42573115-42573331	4:6	0.211538	0.140351	0.962963	0.9375				-0.774287	0.774287	0	0
SRSF1_HepG2	NPHP3	17	3:132415575-132415657	16:18	0.851852	0.875	0.166667	0.117647				0.721269	0.721269	6.92113e-13	6.69043e-11
SRSF1_HepG2	YY1AP1	3	1:155657862-155657992	2:4	0.320755	0.27551	0.965517	0.921053				-0.645152	0.645152	4.69332e-10	3.1191e-08
SRSF1_HepG2	PCMTD1	5	8:52752007-52752198	4:6	0.705882	0.6	0	0.04				0.632941	0.632941	1.59095e-13	1.66398e-11
SRSF1_HepG2	KIAA0494	7	1:47154025-47154216	6:8	0.741935	0.763636	0.14	0.107143				0.629214	0.629214	0	0
SRSF1_HepG2	FAM36A	2	1:245005246-245005360	1:3	0.209924	0.257812	0.82266	0.881356				-0.61814	0.61814	0	0
SRSF1_HepG2	TRO	13	X:54957174-54957464	12:14	0.310345	0.459459	1	1				-0.615098	0.615098	3.66374e-14	3.98431e-12
SRSF1_HepG2	IRF3	2	19:50167700-50168103	1:3	0.32	0.441176	1	0.975				-0.606912	0.606912	0	0
SRSF1_HepG2	ELP2	8	18:33722244-33722310	7:9	0.263158	0.526316	1	1				-0.605263	0.605263	0	0
SRSF1_HepG2	PTPMT1	2	11:47591252-47591443	1:3	0.324468	0.236667	0.84	0.875				-0.576933	0.576933	0	0
SRSF1_HepG2	STAU2	19	8:74439926-74440039	18:20	0.823529	0.9	0.325581	0.269231				0.564359	0.564359	5.89762e-08	2.5768e-06
SRSF1_HepG2	CEP290	52	12:88448117-88448190	51:53	0.333333	0.377778	0.947368	0.884615				-0.560436	0.560436	1.6052e-09	9.69195e-08
SRSF1_HepG2	NCOR1	25	17:15990486-15990659	24:26	0.658228	0.6625	0.15	0.0571429				0.556792	0.556792	0	0
SRSF1_HepG2	MELK	5	9:36594625-36594768	4:6	0.333333	0.46875	0.954545	0.96				-0.556231	0.556231	1.53211e-14	1.77725e-12
SRSF1_HepG2	CEP110	41	9:123933686-123933826	40:42	0.375	0.307692	0.916667	0.8125				-0.523237	0.523237	1.39707e-06	4.42715e-05
SRSF1_HepG2	TPM2	7	9:35684729-35684804	6:8	0.382353	0.483871	0.975	0.930233				-0.519504	0.519504	3.25406e-13	3.26088e-11
SRSF1_HepG2	KIF23	21	15:69733107-69733418	20:22	0.120482	0.14433	0.714286	0.578947				-0.514211	0.514211	2.46125e-12	2.27577e-10
SRSF1_HepG2	MYO1B	24	2:192265475-192265561	23:25	0.387755	0.414966	0.897059	0.916667				-0.505502	0.505502	0	0
SRSF1_HepG2	OCRL	19	X:128718321-128718344	18:20	0.556818	0.506173	0.0240964	0.03125				0.503822	0.503822	0	0
SRSF1_HepG2	MYL6	7	12:56554410-56554454	6:8	0.609238	0.591954	0.0808081	0.113971				0.503206	0.503206	0	0
SRSF1_HepG2	GOLGA4	28	3:37402734-37403712	27:30	0.912409	0.80117	0.403101	0.307087				0.501695	0.501695	0	0
SRSF1_HepG2	RPRD2	6	1:150414357-150414434	5:7	0.941748	0.921739	0.514286	0.357143				0.496029	0.496029	0	0
SRSF1_HepG2	KIAA1217	13	10:24783429-24783533	12:14	0.728814	0.671429	0.282609	0.136364				0.490635	0.490635	6.33401e-11	4.84932e-09
SRSF1_HepG2	BCS1L	3	2:219524760-219524968	2:4	0.806452	0.837838	0.3125	0.375				0.478395	0.478395	3.16641e-06	9.22453e-05
SRSF1_HepG2	NAV2	20	11:20071382-20071447	19:21	0.638889	0.588235	0.117647	0.178571				0.465453	0.465453	3.3628e-08	1.55094e-06
SRSF1_HepG2	ACADM	3	1:76194074-76194173	1:4	0.447674	0.493671	0.930314	0.939252				-0.46411	0.46411	0	0
SRSF1_HepG2	MTERFD2	2	2:242038811-242039910	1:3	0.317073	0.4	0.802198	0.824324				-0.454724	0.454724	0	0
SRSF1_HepG2	ZNF266	8	19:9529438-9529571	7:9	0.347826	0.238095	0.75	0.740741				-0.45241	0.45241	3.85603e-06	0.000107744
SRSF1_HepG2	MAX	2	14:65568264-65568290	1:3	0.823529	0.77193	0.34375	0.346939				0.452385	0.452385	1.05532e-10	7.739e-09
SRSF1_HepG2	ANKIB1	17	7:92021555-92021606	16:18	0.56	0.535714	1	1				-0.452143	0.452143	1.03729e-10	7.63604e-09
SRSF1_HepG2	APAF1	18	12:99097149-99097277	17:19	0.878788	0.888889	0.472222	0.391304				0.452075	0.452075	2.50319e-08	1.18886e-06
SRSF1_HepG2	ATP2C1	20	3:130698093-130698263	19:21	0.470588	0.542636	0.957447	0.956522				-0.450372	0.450372	0	0
SRSF1_HepG2	PNPLA2	2	11:819574-819905	1:3	0.25	0.361702	0.8	0.709677				-0.448988	0.448988	6.0521e-08	2.62075e-06
SRSF1_HepG2	PALM	9	19:740352-740483	8:10	0.769231	0.814815	0.3125	0.384615				0.443465	0.443465	7.0287e-07	2.45444e-05
SRSF1_HepG2	GCKR	12	2:27729655-27729752	11:13	0.411765	0.526316	0.859155	0.962264				-0.441669	0.441669	1.18314e-07	4.86996e-06
SRSF1_HepG2	UGGT2	12	13:96637158-96637591	11:13	0.565217	0.448276	0	0.130435				0.441529	0.441529	3.39933e-11	2.73374e-09
SRSF1_HepG2	R3HDM1	16	2:136399106-136399360	15:17	0.689189	0.597826	0.166667	0.24				0.440174	0.440174	2.98145e-10	2.03804e-08
SRSF1_HepG2	SIN3B	10	19:16973695-16973790	9:11	0	0	0.47619	0.4				-0.438095	0.438095	1.54689e-10	1.11306e-08
SRSF1_HepG2	SLC12A2	21	5:127512797-127512844	20:22	0.448276	0.682927	1	1				-0.434399	0.434399	3.22504e-07	1.20561e-05
SRSF1_HepG2	KIAA1109	65	4:123247010-123247072	63:66	0.333333	0.636364	0.928571	0.909091				-0.433983	0.433983	1.56858e-05	0.000365683
SRSF1_HepG2	RGN	5	X:46949175-46949390	4:6	0.188679	0.197568	0.649616	0.604575				-0.433972	0.433972	0	0
SRSF1_HepG2	ANKRD12	5	18:9204474-9204542	4:6	0.545455	0.555556	0.0625	0.176471				0.43102	0.43102	7.80253e-05	0.00147715
SRSF1_HepG2	SPTAN1	24	9:131355262-131355321	23:25	0.72293	0.672464	0.28125	0.257812				0.428166	0.428166	0	0
SRSF1_HepG2	TOR2A	4	9:130494843-130494970	3:5	0.705882	0.44	1	1				-0.427059	0.427059	3.83538e-06	0.000107323
SRSF1_HepG2	CHD3	34	17:7810919-7811020	33:35	0.333333	0.296296	0.75	0.733333				-0.426852	0.426852	1.28786e-05	0.00031321
SRSF1_HepG2	SCOC	6	4:141300723-141300806	5:7	0.569087	0.537657	0.976242	0.982558				-0.426028	0.426028	0	0
SRSF1_HepG2	QTRTD1	2	3:113775846-113775953	1:3	0.684211	0.673469	0.3	0.206897				0.425392	0.425392	2.49626e-08	1.18852e-06
SRSF1_HepG2	LRCH3	15	3:197585705-197585776	14:16	0.833333	0.806452	0.365385	0.428571				0.422914	0.422914	1.41394e-06	4.47321e-05
SRSF1_HepG2	CAPN7	15	3:15282960-15283095	14:16	0.918605	0.852174	0.581818	0.345455				0.421753	0.421753	3.33067e-16	4.68743e-14
SRSF1_HepG2	RALGPS2	15	1:178861365-178861442	14:16	0.264151	0.174603	0.717949	0.56				-0.419597	0.419597	2.31442e-08	1.11864e-06
SRSF1_HepG2	SMC5	19	9:72961495-72961565	18:20	0.452055	0.337349	0.764706	0.863636				-0.419469	0.419469	4.07843e-09	2.33018e-07
SRSF1_HepG2	PDCD10	3	3:167443189-167443261	2:4	0.75	0.6	0.190476	0.321429				0.419048	0.419048	3.25078e-05	0.000695196
SRSF1_HepG2	ABCA5	38	17:67247888-67248007	37:39	0.192308	0.514286	0.717949	0.823529				-0.417442	0.417442	1.32122e-06	4.2213e-05
SRSF1_HepG2	ABCA10	14	17:67247888-67248007	13:15	0.192308	0.514286	0.717949	0.823529				-0.417442	0.417442	1.32122e-06	4.2213e-05
SRSF1_HepG2	HAAO	7	2:42996853-42996998	6:8	0.483696	0.387097	0.875	0.826923				-0.415565	0.415565	0	0
SRSF1_HepG2	SCRIB	36	8:144873836-144873910	35:37	0.607143	0.818182	0.333333	0.263158				0.414417	0.414417	1.90493e-05	0.000432508
SRSF1_HepG2	SEC24B	5	4:110402833-110402937	4:6	0.131148	0.192308	0.5	0.652174				-0.414359	0.414359	0.000666346	0.00875077
SRSF1_HepG2	CAPN7	17	3:15287033-15287178	16:18	0.991071	0.970803	0.678161	0.460526				0.411594	0.411594	0	0
SRSF1_HepG2	IL17RE	3	3:9945081-9945096	2:4	0.366667	0.604651	0.864865	0.928571				-0.411059	0.411059	2.9503e-07	1.12041e-05
SRSF1_HepG2	ST7L	5	1:113159435-113159517	3:6	0.575	0.535714	0.928571	1				-0.408929	0.408929	2.10285e-07	8.21401e-06
SRSF1_HepG2	KIAA1191	3	5:175786484-175786570	2:4	0.471014	0.563953	0.916667	0.929936				-0.405817	0.405817	0	0
SRSF1_HepG2	BAT2L	31	9:134369792-134369873	30:32	0.148148	0.110429	0.542484	0.526316				-0.405111	0.405111	0	0
SRSF1_HepG2	DLG1	24	3:196802708-196802741	23:25	0.035503	0.0348837	0.447368	0.431373				-0.404177	0.404177	0	0
SRSF1_HepG2	SCMH1	17	1:41499655-41499774	16:18	0.178571	0.305556	0.695652	0.591837				-0.401681	0.401681	3.41971e-12	3.01628e-10
SRSF1_HepG2	SAMD4A	9	14:55203742-55204005	7:10	0.375	0.183333	0.84	0.517241				-0.399454	0.399454	4.49532e-06	0.000122915
SRSF1_HepG2	GPBP1L1	2	1:46151248-46151292	1:3	0.881818	0.89916	0.480769	0.504762				0.397723	0.397723	1.77823e-09	1.0636e-07
SRSF1_HepG2	GUSB	6	7:65439906-65440058	5:7	0.409639	0.408163	0.795775	0.817204				-0.397589	0.397589	1.11022e-16	1.60982e-14
SRSF1_HepG2	FNBP1	10	9:132686123-132686305	9:13	0.564103	0.591837	1	0.95				-0.39703	0.39703	1.79596e-11	1.50108e-09
SRSF1_HepG2	OPA1	7	3:193343881-193343991	6:8	0.653061	0.709402	0.329545	0.242424				0.395247	0.395247	2.72005e-14	3.00935e-12
SRSF1_HepG2	BPTF	6	17:65871672-65871860	5:7	0.42	0.367347	0.666667	0.909091				-0.394205	0.394205	3.1913e-06	9.25858e-05
SRSF1_HepG2	C7orf10	9	7:40314112-40314255	8:10	0.545455	0.552632	1	0.884615				-0.393265	0.393265	1.01919e-08	5.32986e-07
SRSF1_HepG2	USP19	6	3:49154492-49154794	5:7	0.648649	0.565217	1	1				-0.393067	0.393067	9.64937e-09	5.07387e-07
SRSF1_HepG2	ASPH	13	8:62556504-62556560	12:14	0.409524	0.439451	0.812217	0.822751				-0.392997	0.392997	0	0
SRSF1_HepG2	CLASP1	30	2:122166600-122166623	28:31	0.645833	0.643312	0.25	0.257576				0.390785	0.390785	9.4369e-15	1.13599e-12
SRSF1_HepG2	DCAF10	6	9:37857238-37857348	5:7	0.893617	0.909091	0.559322	0.465116				0.389135	0.389135	2.18869e-09	1.29695e-07
SRSF1_HepG2	ZNF673	6	X:46330577-46330620	5:7	0.533333	0.703704	0.2	0.26087				0.388084	0.388084	1.98711e-05	0.000449035
SRSF1_HepG2	CLK2	5	1:155238499-155238586	4:6	0.428571	0.382353	0.78	0.804878				-0.386977	0.386977	1.80982e-06	5.56912e-05
SRSF1_HepG2	POC1A	10	3:52130585-52130728	9:11	0.359375	0.389474	0.771429	0.75				-0.38629	0.38629	1.02024e-07	4.25432e-06
SRSF1_HepG2	FAM21C	18	10:46254763-46254849	17:19	0.409091	0.423077	0.75	0.851852				-0.384842	0.384842	3.53164e-05	0.000746089
SRSF1_HepG2	CASK	19	X:41416285-41416353	18:20	0.471429	0.505618	0.12	0.0925926				0.382227	0.382227	8.70415e-13	8.37173e-11
SRSF1_HepG2	ST5	12	11:8751497-8752756	11:13	0.55	0.463415	0.777778	1				-0.382182	0.382182	5.78171e-05	0.00114084
SRSF1_HepG2	SLC37A4	8	11:118897216-118897398	7:9	0.864	0.837037	0.497908	0.449102				0.377014	0.377014	0	0
SRSF1_HepG2	ZNF232	3	17:5014371-5014514	2:4	0.288136	0.318182	0.608696	0.75				-0.376189	0.376189	1.35135e-05	0.000326163
SRSF1_HepG2	PCGF3	4	4:726189-726287	3:5	0.0344828	0.0952381	0.40625	0.473684				-0.375107	0.375107	6.93274e-06	0.000180289
SRSF1_HepG2	FAHD2A	2	2:96071025-96071150	1:3	0.173913	0.136364	0.47619	0.580645				-0.373279	0.373279	8.72647e-08	3.67087e-06
SRSF1_HepG2	C3orf23	6	3:44399709-44401288	5:7	0.387097	0.434783	0.75	0.818182				-0.373151	0.373151	0.00013596	0.00233179
SRSF1_HepG2	MDM2	2	12:69202797-69202866	1:3	0.91133	0.886139	0.575758	0.477273				0.372219	0.372219	0	0
SRSF1_HepG2	ACSM2A	10	16:20486972-20487095	9:11	0.647059	0.578947	0.967742	1				-0.370868	0.370868	3.74717e-08	1.69955e-06
SRSF1_HepG2	C12orf35	4	12:32133812-32138891	3:5	0.408163	0.444444	0.681818	0.909091				-0.369151	0.369151	0.000191913	0.00309714
SRSF1_HepG2	BCL2L12	6	19:50173473-50173745	5:7	0.595745	0.578125	0.942308	0.967742				-0.36809	0.36809	2.74384e-10	1.88911e-08
SRSF1_HepG2	PIGF	6	2:46815214-46815318	5:7	0.538462	0.573171	0.189076	0.186747				0.367905	0.367905	1.33227e-15	1.74655e-13
SRSF1_HepG2	ANGPTL1	2	1:178838249-178838358	1:3	0.869565	0.761905	0.470588	0.428571				0.366155	0.366155	9.72004e-05	0.00177351
SRSF1_HepG2	ABCD4	8	14:74759857-74759951	7:9	0.222222	0.313433	0.650602	0.611111				-0.363029	0.363029	0.00186623	0.0198774
SRSF1_HepG2	PVR	6	19:45162010-45162168	5:7	0.488372	0.5	0.897959	0.816092				-0.36284	0.36284	4.44089e-16	6.11501e-14
SRSF1_HepG2	PLCXD1	2	X:198149-198351	1:3	0.542373	0.40625	0.844262	0.82659				-0.361115	0.361115	1.73306e-13	1.79301e-11
SRSF1_HepG2	ZDHHC16	8	10:99213556-99213603	7:9	0.884211	0.863636	0.46087	0.565789				0.360594	0.360594	4.44089e-16	6.11501e-14
SRSF1_HepG2	MKNK1	16	1:47025906-47025949	15:17	0.592593	0.555556	0.214286	0.214286				0.359788	0.359788	3.47326e-05	0.000736193
SRSF1_HepG2	CENPO	2	2:25016721-25016834	1:3	0.197531	0.278689	0.694444	0.5				-0.359113	0.359113	0.000891062	0.0111252
SRSF1_HepG2	DIS3	3	13:73354984-73355141	2:4	0.94	0.95082	0.730769	0.444444				0.357803	0.357803	8.37257e-08	3.53755e-06
SRSF1_HepG2	ROBO1	20	3:78696779-78696805	19:21	0.868421	0.836	0.516779	0.474227				0.356708	0.356708	0	0
SRSF1_HepG2	AC005336.2	7	19:16035571-16035692	6:8	0.65	0.638889	1	1				-0.355556	0.355556	3.18223e-11	2.58084e-09
SRSF1_HepG2	MPHOSPH9	10	12:123687661-123687922	9:11	0.482759	0.27907	0.75	0.722222				-0.355197	0.355197	0.000149959	0.0025266
SRSF1_HepG2	IFT88	6	13:21163950-21164006	5:7	0.318841	0.355263	0.8125	0.571429				-0.354912	0.354912	4.73927e-06	0.000128849
SRSF1_HepG2	BCLAF1	13	6:136588167-136588313	12:14	0.59434	0.608553	0.96729	0.945122				-0.35476	0.35476	0	0
SRSF1_HepG2	PIKFYVE	36	2:209212583-209212747	35:37	0.594595	0.619469	1	0.923077				-0.354507	0.354507	1.06137e-13	1.1349e-11
SRSF1_HepG2	TBX3	3	12:115117718-115117777	2:4	0.72973	0.746032	0.365079	0.402062				0.35431	0.35431	0	0
SRSF1_HepG2	ZFYVE19	8	15:41104897-41105100	7:9	0.426471	0.487805	0.846154	0.775				-0.353439	0.353439	3.09101e-11	2.51753e-09
SRSF1_HepG2	C1orf9	4	1:172522400-172522510	3:5	0.40625	0.577778	1	0.685714				-0.350843	0.350843	0.000218394	0.00345459
SRSF1_HepG2	ITGA6	27	2:173366500-173366629	26:28	0.733333	0.664311	0.410526	0.285714				0.350702	0.350702	1.11022e-15	1.47567e-13
SRSF1_HepG2	SLC25A14	6	X:129484620-129484705	5:7	0.965517	0.897436	0.571429	0.590909				0.350308	0.350308	3.77864e-06	0.000106201
SRSF1_HepG2	EYA3	7	1:28354300-28354437	6:8	0.54902	0.595238	0.243902	0.2				0.350178	0.350178	2.21333e-05	0.000494565
SRSF1_HepG2	REV1	4	2:100067807-100067963	3:5	0.488889	0.339286	0.0833333	0.05				0.347421	0.347421	1.76326e-11	1.48021e-09
SRSF1_HepG2	RALGAPA1	20	14:36157665-36157746	19:21	0.537313	0.608108	0.292308	0.159091				0.347011	0.347011	1.98041e-08	9.74424e-07
SRSF1_HepG2	SORBS2	16	4:186572938-186572982	15:17	0.815385	0.797101	0.418919	0.5				0.346784	0.346784	8.34741e-09	4.47534e-07
SRSF1_HepG2	SPAG9	7	17:49109042-49109083	6:8	0.565217	0.556338	0.25	0.18018				0.345688	0.345688	6.66134e-16	9.04241e-14
SRSF1_HepG2	RCOR3	13	1:211485579-211485829	12:14	0.0784314	0.0862069	0.428571	0.423077				-0.343505	0.343505	1.7784e-07	7.03277e-06
SRSF1_HepG2	DOCK5	42	8:25246325-25246462	41:43	0.428571	0.382353	0	0.125				0.342962	0.342962	2.42656e-05	0.000536929
SRSF1_HepG2	ST7	15	7:116774178-116774246	14:16	0.606061	0.489796	0.205128	0.206897				0.341916	0.341916	3.71517e-05	0.000777141
SRSF1_HepG2	SLC39A5	3	12:56624615-56624657	2:4	0.632812	0.661972	0.981651	0.993976				-0.340421	0.340421	0	0
SRSF1_HepG2	TMEM106A	2	17:41364224-41364413	1:3	0.571429	0.526316	0.913043	0.864865				-0.340082	0.340082	3.15562e-06	9.20711e-05
SRSF1_HepG2	MPI	7	15:75189352-75189560	6:8	0.56383	0.60241	0.913043	0.933333				-0.340069	0.340069	7.77156e-16	1.04019e-13
SRSF1_HepG2	TBCD	2	17:80714041-80714091	1:3	0.56	0.6	0.84	1				-0.34	0.34	0.00134431	0.0153796
SRSF1_HepG2	MAGI1	15	3:65433697-65433732	14:16	0.69697	0.854839	0.472222	0.4				0.339793	0.339793	4.20943e-06	0.00011626
SRSF1_HepG2	CAPN7	20	3:15292438-15292530	19:21	0.647887	0.650943	1	0.978261				-0.339715	0.339715	7.77156e-16	1.04019e-13
SRSF1_HepG2	STAG2	4	X:123155217-123155281	3:5	0.52	0.510204	0.166667	0.185185				0.339176	0.339176	1.07425e-05	0.000267375
SRSF1_HepG2	COL4A3BP	12	5:74695135-74695212	11:13	0.413043	0.458333	0.113208	0.08				0.339085	0.339085	7.74194e-11	5.83389e-09
SRSF1_HepG2	PRMT2	2	21:48056351-48056459	1:3	0.0538462	0.0780669	0.450893	0.357955				-0.338467	0.338467	0	0
SRSF1_HepG2	ARHGEF11	39	1:156908210-156908305	38:40	0.725	0.727273	0.333333	0.444444				0.337247	0.337247	0.000221585	0.00350217
SRSF1_HepG2	PRKAB2	3	1:146639346-146639512	2:4	0.555556	0.76	0.988889	1				-0.336667	0.336667	5.55112e-15	6.85473e-13
SRSF1_HepG2	BAT2L	16	9:134349841-134351922	15:17	0.488889	0.397059	0.772727	0.784314				-0.335547	0.335547	1.40719e-07	5.74277e-06
SRSF1_HepG2	SLC2A8	5	9:130164836-130165032	4:6	0.578947	0.642857	0.892857	1				-0.335526	0.335526	3.11149e-06	9.10611e-05
SRSF1_HepG2	SLC47A1	16	17:19474791-19474885	15:17	0.523077	0.449275	0.822115	0.820896				-0.335329	0.335329	0	0
SRSF1_HepG2	TMEM139	4	7:142983034-142983295	2:5	0.866667	0.513514	0.28125	0.428571				0.335179	0.335179	0.0051816	0.0431203
SRSF1_HepG2	FAM91A1	21	8:124820512-124820616	20:22	0.609375	0.72043	1	1				-0.335097	0.335097	0	0
SRSF1_HepG2	ANKRD16	6	10:5922261-5922339	5:7	0.407407	0.666667	0.928571	0.814815				-0.334656	0.334656	0.00013161	0.00227348
SRSF1_HepG2	KIAA1432	15	9:5753536-5753646	14:16	0.410714	0.552239	0.931034	0.7				-0.334041	0.334041	2.62678e-05	0.000575247
SRSF1_HepG2	CTNND1	4	11:57556509-57556627	3:5	0.928571	0.943878	0.633333	0.571429				0.333844	0.333844	0	0
SRSF1_HepG2	CD46	7	1:207940952-207940996	6:8	0.366667	0.336188	0.018595	0.0174603				0.3334	0.3334	0	0
SRSF1_HepG2	MBD1	18	18:47797839-47797910	17:19	0.318182	0.489362	0.772727	0.7				-0.332592	0.332592	0.000356402	0.00527574
SRSF1_HepG2	HNMT	3	2:138724667-138725013	2:4	0.136275	0.153702	0.452539	0.500887				-0.331724	0.331724	0	0
SRSF1_HepG2	SLC4A7	6	3:27477879-27478039	5:7	0.6875	0.653061	1	1				-0.329719	0.329719	2.94131e-12	2.66809e-10
SRSF1_HepG2	C2orf60	2	2:200813041-200813195	1:3	0.634783	0.627737	1	0.918919				-0.3282	0.3282	1.88595e-10	1.3419e-08
SRSF1_HepG2	YIPF1	12	1:54320674-54320724	11:13	0.611111	0.604651	0.186047	0.375				0.327358	0.327358	8.20663e-05	0.00153543
SRSF1_HepG2	CTAGE5	21	14:39790132-39790260	20:22	0.953437	0.968064	0.631148	0.636628				0.326863	0.326863	0	0
SRSF1_HepG2	CRYZ	2	1:75196066-75196104	1:3	0.44596	0.425243	0.119195	0.100228				0.32589	0.32589	0	0
SRSF1_HepG2	FIP1L1	14	4:54306749-54306775	13:15	0.648352	0.611111	0.233333	0.375				0.325565	0.325565	1.5322e-10	1.10665e-08
SRSF1_HepG2	CARD8	5	19:48741640-48741789	4:6	0.541667	0.464286	0.947368	0.705882				-0.323649	0.323649	0.00258487	0.0256344
SRSF1_HepG2	PHF14	15	7:11101418-11101468	14:16	0.533333	0.49359	0.801527	0.872				-0.323302	0.323302	6.93159e-08	2.97468e-06
SRSF1_HepG2	STAP2	8	19:4328672-4328806	7:9	0.666667	0.62963	0.942857	1				-0.32328	0.32328	2.46782e-06	7.36881e-05
SRSF1_HepG2	VEZT	7	12:95650326-95650398	6:8	0.259615	0.201613	0.506849	0.6				-0.322811	0.322811	1.06255e-09	6.60296e-08
SRSF1_HepG2	CDC42BPA	23	1:227239582-227239686	21:24	0.536585	0.4	0.137255	0.153846				0.322742	0.322742	3.45756e-06	9.89455e-05
SRSF1_HepG2	ZNF317	5	19:9268510-9268751	4:6	0.521739	0.44186	0.827586	0.777778				-0.320882	0.320882	0.000305801	0.00463422
SRSF1_HepG2	ZCCHC6	17	9:88933873-88933973	16:18	0.566667	0.794118	1	1				-0.319608	0.319608	1.33627e-06	4.25561e-05
SRSF1_HepG2	DNM1L	17	12:32891198-32891230	16:18	0.409091	0.595238	0.833333	0.807692				-0.318348	0.318348	0.00030183	0.00459222
SRSF1_HepG2	SNX15	12	11:64806044-64806305	11:13	0.581081	0.670103	0.959184	0.928571				-0.318285	0.318285	7.87443e-10	5.02942e-08
SRSF1_HepG2	PGF	6	14:75412916-75412978	5:7	0.465116	0.395833	0.759036	0.738462				-0.318274	0.318274	1.13143e-06	3.67668e-05
SRSF1_HepG2	ATP5S	6	14:50790663-50790834	5:7	0.55	0.655738	0.902439	0.939394				-0.318048	0.318048	1.32329e-06	4.2213e-05
SRSF1_HepG2	DENND4A	20	15:65992882-65993010	19:21	0	0.107143	0.358974	0.382353				-0.317092	0.317092	4.81041e-06	0.000130598
SRSF1_HepG2	DLEU1	2	13:50657278-50657330	1:4	0.611111	0.525	0.204819	0.298246				0.316523	0.316523	5.36424e-06	0.000143196
SRSF1_HepG2	ZNF384	6	12:6787829-6787876	5:7	0.472973	0.488889	0.8	0.793103				-0.315621	0.315621	2.44545e-08	1.17308e-06
SRSF1_HepG2	SFRS17A	5	X:1719031-1719100	4:6	0.0882353	0.0888889	0.423077	0.384615				-0.315284	0.315284	1.79622e-05	0.00040977
SRSF1_HepG2	SDCCAG3	3	9:139303451-139303519	2:4	0.0625	0.166667	0.580645	0.277778				-0.314628	0.314628	0.000593151	0.007916
SRSF1_HepG2	IP6K2	11	3:48731892-48731958	10:12	0.97619	0.962264	0.625	0.684211				0.314622	0.314622	4.89016e-06	0.000132013
SRSF1_HepG2	SMARCD1	5	12:50481146-50481268	4:6	0.609467	0.531401	0.880734	0.887755				-0.31381	0.31381	1.11022e-16	1.60982e-14
SRSF1_HepG2	CAMK2G	20	10:75579290-75579403	19:22	0.142857	0.258621	0.477273	0.55				-0.312897	0.312897	2.30557e-06	6.93846e-05
SRSF1_HepG2	DTX3	2	12:57999127-57999514	1:3	0.636364	0.625	0.952381	0.933333				-0.312175	0.312175	0.000290243	0.00444421
SRSF1_HepG2	HEXIM2	3	17:43239855-43240002	2:4	0.202797	0.212766	0.493506	0.546218				-0.312081	0.312081	1.05471e-14	1.2617e-12
SRSF1_HepG2	GAK	26	4:862327-863320	21:27	0.7	0.676923	1	1				-0.311538	0.311538	3.07532e-13	3.09798e-11
SRSF1_HepG2	TCEA2	7	20:62695245-62695302	6:8	0.346154	0.45	0.108108	0.0652174				0.311414	0.311414	1.05883e-06	3.49776e-05
SRSF1_HepG2	RBM5	8	3:50141681-50141741	7:9	0.444444	0.554217	0.824176	0.797101				-0.311308	0.311308	2.61956e-08	1.2319e-06
SRSF1_HepG2	RBM6	33	3:50141681-50141741	32:34	0.444444	0.554217	0.824176	0.797101				-0.311308	0.311308	2.61956e-08	1.2319e-06
SRSF1_HepG2	YLPM1	5	14:75264283-75266400	4:6	0.673469	0.64	1	0.935484				-0.311007	0.311007	3.23318e-08	1.49838e-06
SRSF1_HepG2	STK19	3	6:31940398-31940534	2:4	0.5	0.722222	0.892857	0.95				-0.310317	0.310317	0.000120415	0.00210863
SRSF1_HepG2	OSBPL3	9	7:24902819-24902911	8:10	0.560976	0.506173	0.894737	0.791667				-0.309628	0.309628	0.000303684	0.00461676
SRSF1_HepG2	ZCCHC10	2	5:132358533-132358598	1:3	0.634615	0.641975	0.351852	0.305556				0.309592	0.309592	2.41785e-06	7.24221e-05
SRSF1_HepG2	ENTPD6	2	20:25187158-25187226	1:3	0.786885	0.822785	0.489583	0.506024				0.307031	0.307031	3.20855e-08	1.49057e-06
SRSF1_HepG2	NCOA1	22	2:24990948-24991004	21:23	0.636364	0.6	0.85	1				-0.306818	0.306818	0.000407539	0.00589591
SRSF1_HepG2	GCKR	6	2:27722009-27722075	5:7	0.565217	0.512821	0.847059	0.842857				-0.305939	0.305939	7.38949e-06	0.00019087
SRSF1_HepG2	ASB1	3	2:239344352-239344654	2:4	0.62963	0.564516	0.9375	0.866667				-0.30501	0.30501	2.09932e-09	1.24786e-07
SRSF1_HepG2	LSM1	3	8:38027320-38027435	2:4	0.657459	0.60101	0.962121	0.905882				-0.304767	0.304767	0	0
SRSF1_HepG2	FYN	11	6:112021307-112021471	10:12	0.559322	0.542857	0.836364	0.875				-0.304592	0.304592	1.07939e-06	3.53757e-05
SRSF1_HepG2	DEDD2	3	19:42720832-42721197	2:4	0.416667	0.315789	0.777778	0.5625				-0.303911	0.303911	0.00208322	0.0216465
SRSF1_HepG2	NF1	54	17:29683478-29683600	53:55	0.641509	0.647727	0.953125	0.941176				-0.302532	0.302532	7.47114e-10	4.81473e-08
SRSF1_HepG2	CARD10	9	22:37904534-37904689	6:10	0.636364	0.758621	1	1				-0.302508	0.302508	3.09996e-12	2.79874e-10
SRSF1_HepG2	ALDH1L1	9	3:125872287-125872424	8:10	0.650794	0.703125	0.957143	1				-0.301612	0.301612	9.99012e-12	8.6131e-10
SRSF1_HepG2	C4orf29	5	4:128922871-128922915	4:6	0.37037	0.352941	0.0434783	0.0769231				0.301455	0.301455	0.000120086	0.00210674
SRSF1_HepG2	OSBPL3	12	7:24888688-24888795	11:13	0.964912	0.916667	0.48	0.8				0.300789	0.300789	2.12819e-06	6.43499e-05
SRSF1_HepG2	RBCK1	3	20:391056-391407	2:4	0.25641	0.216129	0.541152	0.531609				-0.300111	0.300111	0	0
SRSF1_HepG2	SFRS18	2	6:99864225-99864304	1:4	0.987805	0.989796	0.722222	0.655738				0.29982	0.29982	5.77316e-15	7.08322e-13
SRSF1_HepG2	PREPL	3	2:44586636-44587177	2:4	0.375	0.444444	0.795918	0.622222				-0.299348	0.299348	4.54801e-06	0.000124001
SRSF1_HepG2	FN1	33	2:216245534-216245803	32:34	0.458241	0.459463	0.758337	0.756497				-0.298565	0.298565	0	0
SRSF1_HepG2	GPR126	6	6:142704897-142704980	5:7	0.567901	0.587629	0.247368	0.311258				0.298452	0.298452	1.40055e-10	1.0154e-08
SRSF1_HepG2	CTNS	5	17:3552141-3552225	4:6	0.952381	1	0.675676	0.68				0.298353	0.298353	6.96511e-06	0.000180885
SRSF1_HepG2	ATXN3	4	14:92560090-92560194	3:5	0.461538	0.619048	0.882353	0.794118				-0.297942	0.297942	8.4692e-05	0.00157532
SRSF1_HepG2	AP1G2	7	14:24035025-24035101	6:8	0.696203	0.639535	0.985	0.945578				-0.29742	0.29742	0	0
SRSF1_HepG2	GOLT1B	3	12:21660878-21661043	2:4	0.333333	0.288136	0.027027	0				0.297221	0.297221	4.14203e-11	3.30327e-09
SRSF1_HepG2	RNMT	2	18:13730626-13730754	1:3	0.969697	0.957143	0.666667	0.666667				0.296753	0.296753	6.78961e-11	5.13649e-09
SRSF1_HepG2	TMEM188	2	16:50059562-50059612	1:3	0.276596	0.3125	0.54717	0.633333				-0.295704	0.295704	9.88298e-05	0.00179129
SRSF1_HepG2	C6orf138	4	6:47867345-47869671	3:5	0.716667	0.757143	0.461538	0.421053				0.295609	0.295609	6.98543e-06	0.000181167
SRSF1_HepG2	C1RL	2	12:7260847-7261075	1:3	0.717172	0.687023	0.994845	1				-0.295325	0.295325	0	0
SRSF1_HepG2	AXIN2	8	17:63532987-63533181	7:9	0.111111	0.0188679	0.375	0.34375				-0.294385	0.294385	3.49617e-06	9.94303e-05
SRSF1_HepG2	MANBAL	2	20:35925699-35925937	1:3	0.194444	0.195122	0.588235	0.388889				-0.293779	0.293779	0.000308157	0.00466624
SRSF1_HepG2	HMMR	5	5:162894707-162894754	4:6	0.373333	0.492063	0.153846	0.125				0.293275	0.293275	3.97862e-05	0.000824143
SRSF1_HepG2	NECAB3	11	20:32247303-32247356	10:12	0.769231	0.613636	0.988506	0.980769				-0.293204	0.293204	3.31501e-11	2.67719e-09
SRSF1_HepG2	CRAT	2	9:131871458-131871556	1:3	0.318182	0.740741	0.20339	0.269231				0.293151	0.293151	0.000608607	0.00808379
SRSF1_HepG2	PIKFYVE	13	2:209169570-209169737	12:14	0.658537	0.57377	0.26	0.387097				0.292605	0.292605	0.000121252	0.00211865
SRSF1_HepG2	MTIF2	2	2:55495714-55495875	1:3	0.650794	0.713592	0.980769	0.967391				-0.291887	0.291887	0	0
SRSF1_HepG2	TMEM62	12	15:43470805-43470909	11:13	0.98	1	0.721311	0.676471				0.291109	0.291109	4.22615e-09	2.39315e-07
SRSF1_HepG2	CCBL2	2	1:89453935-89454034	1:3	0.52	0.567568	0.833333	0.833333				-0.28955	0.28955	0.00590289	0.0473717
SRSF1_HepG2	RBMXL1	2	1:89453935-89454034	1:3	0.52	0.567568	0.833333	0.833333				-0.28955	0.28955	0.00590289	0.0473717
SRSF1_HepG2	CHCHD7	2	8:57125321-57125468	1:3	0.34	0.362205	0.691824	0.587571				-0.288595	0.288595	0.00092953	0.0114782
SRSF1_HepG2	TJP1	24	15:30011981-30012220	23:25	0.642857	0.75	0.441176	0.375				0.28834	0.28834	9.82579e-05	0.001786
SRSF1_HepG2	TTC17	17	11:43457714-43457884	16:18	0.719101	0.663462	0.984733	0.974138				-0.288154	0.288154	0	0
SRSF1_HepG2	FIP1L1	2	4:54245240-54245284	1:3	0.0694444	0.115789	0.346154	0.415094				-0.288007	0.288007	1.22159e-08	6.25164e-07
SRSF1_HepG2	RALGAPA2	40	20:20377339-20377378	39:41	1	0.96	0.634146	0.75				0.287927	0.287927	1.38051e-05	0.000331114
SRSF1_HepG2	GRB10	23	7:50671695-50671782	22:24	0.704545	0.72	1	1				-0.287727	0.287727	5.42822e-06	0.000144702
SRSF1_HepG2	PATL1	7	11:59423429-59423518	6:8	0.527778	0.73913	0.84	1				-0.286546	0.286546	7.15905e-06	0.000185418
SRSF1_HepG2	AGXT2L2	15	5:177639974-177640104	14:16	0.631579	0.6	0.921875	0.881356				-0.285826	0.285826	0.000280352	0.00430998
SRSF1_HepG2	PHF8	15	X:54020034-54020336	14:16	0.484375	0.473684	0.775281	0.754386				-0.285804	0.285804	4.54251e-07	1.65923e-05
SRSF1_HepG2	OFD1	12	X:13769368-13769487	11:13	0.522727	0.509434	0.714286	0.888889				-0.285507	0.285507	0.0015449	0.0170724
SRSF1_HepG2	RALGPS1	7	9:129812322-129812411	6:8	0.954545	0.928571	0.5	0.8125				0.285308	0.285308	0.000824373	0.0104286
SRSF1_HepG2	MLXIP	8	12:122616839-122616930	7:9	0.945946	0.829787	0.619048	0.586207				0.285239	0.285239	2.10916e-05	0.000474376
SRSF1_HepG2	STIL	17	1:47725961-47726211	16:18	0.810811	0.619048	1	1				-0.285071	0.285071	0.000142243	0.00242433
SRSF1_HepG2	PTK2	5	8:141889570-141889736	4:6	0.52	0.576923	0.897727	0.768116				-0.28446	0.28446	6.01896e-08	2.61231e-06
SRSF1_HepG2	ZDHHC20	15	13:21952800-21952877	14:16	0.31746	0.416667	0.0289855	0.136364				0.284389	0.284389	4.29903e-08	1.91803e-06
SRSF1_HepG2	CENPH	7	5:68498746-68498797	6:8	0.611111	0.757576	0.936508	1				-0.283911	0.283911	5.92157e-08	2.5768e-06
SRSF1_HepG2	MIIP	2	1:12081702-12081897	1:3	0.695652	0.703704	1	0.966667				-0.283655	0.283655	7.65021e-06	0.000197073
SRSF1_HepG2	STK25	3	2:242447421-242447550	2:4	0.492537	0.609375	0.824074	0.84507				-0.283616	0.283616	2.51299e-08	1.19056e-06
SRSF1_HepG2	PHF3	4	6:64388729-64388921	3:5	0.3	0.304348	0.04	0				0.282174	0.282174	3.61101e-06	0.000102241
SRSF1_HepG2	SLC38A9	17	5:54923719-54923808	16:18	0.55102	0.559322	0.851064	0.822222				-0.281472	0.281472	1.09465e-05	0.000272099
SRSF1_HepG2	AC124312.1	3	15:25324973-25325226	2:4	0	0.0285714	0.276596	0.314286				-0.281155	0.281155	9.13045e-06	0.000229039
SRSF1_HepG2	RAPGEF6	28	5:130775839-130775921	27:29	0.24	0.32	0	0				0.28	0.28	1.78953e-06	5.51555e-05
SRSF1_HepG2	FNIP1	45	5:130775839-130775921	44:46	0.24	0.32	0	0				0.28	0.28	1.78953e-06	5.51555e-05
SRSF1_HepG2	LETMD1	4	12:51445875-51446029	3:5	0.435294	0.464912	0.721311	0.7375				-0.279303	0.279303	2.19031e-08	1.06133e-06
SRSF1_HepG2	SLC9A8	15	20:48503289-48503435	14:16	0.666667	0.775	1	1				-0.279167	0.279167	3.74961e-05	0.000783487
SRSF1_HepG2	HNRNPD	2	4:83292681-83292737	1:3	0.841667	0.844215	0.563131	0.565688				0.278531	0.278531	0	0
SRSF1_HepG2	CARM1	15	19:11032051-11032119	14:16	0.166667	0.191489	0.473684	0.44				-0.277764	0.277764	1.05448e-08	5.48445e-07
SRSF1_HepG2	USP4	7	3:49348947-49350046	6:8	0.790698	0.896552	0.512821	0.619048				0.277691	0.277691	0.000129203	0.00223999
SRSF1_HepG2	FLNA	30	X:153585619-153585642	29:31	0.553957	0.558405	0.852459	0.814815				-0.277456	0.277456	1.33227e-15	1.74655e-13
SRSF1_HepG2	PUF60	7	8:144902836-144902886	6:8	0.785047	0.744966	0.494624	0.480519				0.277435	0.277435	3.49794e-09	2.01658e-07
SRSF1_HepG2	SPATS2L	11	2:201303845-201304051	10:12	0.587332	0.600343	0.341176	0.292453				0.277023	0.277023	0	0
SRSF1_HepG2	INTS9	5	8:28704264-28704326	4:6	0.954545	0.913043	0.814815	0.5				0.276387	0.276387	0.000943337	0.0116262
SRSF1_HepG2	OS9	13	12:58113882-58114046	12:14	0.29505	0.316252	0.571227	0.592187				-0.276057	0.276057	3.16558e-12	2.84456e-10
SRSF1_HepG2	RBM10	4	X:47030427-47030657	3:5	0.566038	0.666667	0.840909	0.942857				-0.275531	0.275531	1.33655e-05	0.000323818
SRSF1_HepG2	MAP3K4	18	6:161519310-161519459	17:19	0.368421	0.387755	0.146341	0.0588235				0.275506	0.275506	2.91162e-05	0.000630784
SRSF1_HepG2	MPRIP	24	17:17083921-17083983	23:25	0.705882	0.663551	0.461538	0.357143				0.275376	0.275376	8.46139e-07	2.88169e-05
SRSF1_HepG2	TTC8	18	14:89341370-89341453	17:19	1	0.945455	0.777778	0.617647				0.275015	0.275015	9.77546e-07	3.26531e-05
SRSF1_HepG2	DNAJC25-GNG10	2	9:114405137-114405374	1:3	0.56	0.439024	0.666667	0.882353				-0.274998	0.274998	0.00314958	0.0298578
SRSF1_HepG2	DNAJC25	2	9:114405137-114405374	1:3	0.56	0.439024	0.666667	0.882353				-0.274998	0.274998	0.00314958	0.0298578
SRSF1_HepG2	SNX25	16	4:186272599-186272763	15:17	1	1	0.727273	0.723077				0.274825	0.274825	1.63688e-08	8.13761e-07
SRSF1_HepG2	MED23	26	6:131913528-131913600	25:27	0.723404	0.711864	1	0.984127				-0.274429	0.274429	6.7335e-13	6.54209e-11
SRSF1_HepG2	FANCG	4	9:35078138-35078340	3:5	0.590909	0.8	0.9375	1				-0.273295	0.273295	0.0017028	0.0184825
SRSF1_HepG2	HAUS4	5	14:23420764-23420898	4:6	0.655556	0.608491	0.894928	0.914894				-0.272888	0.272888	0	0
SRSF1_HepG2	BCORL1	6	X:129158965-129159354	5:7	1	0.888889	0.823529	0.52				0.27268	0.27268	0.000130438	0.00225732
SRSF1_HepG2	NAP1L4	16	11:2970457-2970494	15:17	0.413978	0.474074	0.221429	0.122642				0.271991	0.271991	0	0
SRSF1_HepG2	RRN3	6	16:15180222-15180311	5:7	0.891667	0.863636	0.722222	0.490196				0.271442	0.271442	5.72497e-09	3.18534e-07
SRSF1_HepG2	PCNT	34	21:47845745-47845885	33:35	0.733333	0.647059	0.923077	1				-0.271342	0.271342	0.00268982	0.0264151
SRSF1_HepG2	NCAPG2	28	7:158443524-158443664	27:29	0.97619	0.9375	0.627119	0.744186				0.271193	0.271193	4.06812e-07	1.49165e-05
SRSF1_HepG2	C6orf130	5	6:41036580-41036692	4:6	0.680982	0.685446	0.959016	0.948454				-0.270521	0.270521	0	0
SRSF1_HepG2	GPBP1	8	5:56532940-56532999	7:9	0.325397	0.37037	0.0884354	0.0666667				0.270333	0.270333	2.03171e-14	2.27409e-12
SRSF1_HepG2	KIAA0430	24	16:15694498-15694558	23:25	0.75	0.690476	0.981132	1				-0.270328	0.270328	1.59739e-07	6.39625e-06
SRSF1_HepG2	LIN7A	4	12:81241878-81241954	3:5	0.348837	0.30303	0.0344828	0.0816327				0.267876	0.267876	1.83193e-07	7.22952e-06
SRSF1_HepG2	CDC25C	4	5:137665242-137665336	3:5	0.916667	0.887755	0.632653	0.636364				0.267703	0.267703	8.93951e-07	3.01236e-05
SRSF1_HepG2	C7orf58	14	7:120768436-120768540	13:15	0.652174	0.8125	1	1				-0.267663	0.267663	3.21982e-05	0.000690115
SRSF1_HepG2	HIRIP3	4	16:30005227-30006164	3:5	0.489796	0.54386	0.738095	0.830189				-0.267314	0.267314	3.27548e-05	0.000698136
SRSF1_HepG2	TBC1D23	15	3:100030677-100030721	14:16	0.264957	0.192771	0.491935	0.5				-0.267104	0.267104	1.90028e-10	1.34708e-08
SRSF1_HepG2	FAM82B	5	8:87497101-87497190	4:6	0.5625	0.591241	0.866667	0.820225				-0.266575	0.266575	6.50667e-10	4.23598e-08
SRSF1_HepG2	IL4I1	2	19:50430951-50431105	1:3	0.355769	0.384615	0.623762	0.649123				-0.26625	0.26625	3.10595e-07	1.17024e-05
SRSF1_HepG2	NUP62	2	19:50430951-50431105	1:3	0.355769	0.384615	0.623762	0.649123				-0.26625	0.26625	3.10595e-07	1.17024e-05
SRSF1_HepG2	FAM126A	11	7:22986571-22986866	10:12	0.717391	0.896907	0.555556	0.526316				0.266214	0.266214	8.6713e-06	0.000218966
SRSF1_HepG2	FOXN2	2	2:48555700-48555841	1:3	0.46875	0.692308	0.361702	0.27027				0.264543	0.264543	0.00271966	0.0266126
SRSF1_HepG2	PPP6R3	2	11:68272613-68272739	1:3	0.634146	0.630769	0.388889	0.347826				0.2641	0.2641	0.00118092	0.0138497
SRSF1_HepG2	TNRC18	17	7:5401225-5401353	16:18	0.690476	0.533333	0.805556	0.944444				-0.263095	0.263095	0.000114439	0.00202437
SRSF1_HepG2	GLYCTK	4	3:52325761-52325938	3:5	0.568966	0.575	0.776	0.894118				-0.263076	0.263076	2.71423e-07	1.03901e-05
SRSF1_HepG2	PTPN3	5	9:112216776-112216854	4:6	1	0.956522	0.730769	0.7				0.262876	0.262876	0.000100608	0.00182008
SRSF1_HepG2	RRP1	11	21:45220743-45220762	10:12	0.690476	0.783784	1	1				-0.26287	0.26287	1.92999e-11	1.60508e-09
SRSF1_HepG2	CP	19	3:148890292-148891517	18:20	0.625	0.666667	0.926829	0.88961				-0.262386	0.262386	1.80357e-10	1.28807e-08
SRSF1_HepG2	UBXN2B	6	8:59352192-59352329	5:7	0.724138	0.692308	0.941176	1				-0.262365	0.262365	0.00035867	0.00529703
SRSF1_HepG2	BRD8	9	5:137504159-137504377	8:10	0.651786	0.615385	0.861538	0.930233				-0.2623	0.2623	9.70687e-08	4.05654e-06
SRSF1_HepG2	RXRB	3	6:33166946-33167193	2:4	0.96	0.863636	0.652174	0.647059				0.262202	0.262202	0.00160459	0.01761
SRSF1_HepG2	SLC38A9	12	5:54948357-54948551	11:13	0.583333	0.648649	0.866667	0.888889				-0.261787	0.261787	0.00134316	0.0153756
SRSF1_HepG2	ZDHHC4	2	7:6617221-6617351	1:3	0.217391	0.333333	0.581395	0.492537				-0.261604	0.261604	6.29248e-05	0.00122771
SRSF1_HepG2	CCHCR1	16	6:31112464-31112565	15:17	0.842105	0.636364	1	1				-0.260766	0.260766	1.45707e-05	0.000346008
SRSF1_HepG2	BTN3A2	6	6:26373125-26373325	5:7	0.608696	0.785714	0.982456	0.933333				-0.26069	0.26069	2.21443e-05	0.000494565
SRSF1_HepG2	USP8	13	15:50776472-50776558	12:14	0.21875	0.136	0.429688	0.442105				-0.258521	0.258521	2.8964e-09	1.69016e-07
SRSF1_HepG2	CENPK	8	5:64824746-64824844	7:9	0.666667	0.790698	0.974359	1				-0.258497	0.258497	4.36057e-09	2.46199e-07
SRSF1_HepG2	TAF5	3	10:105137992-105138307	2:4	0.75	0.733333	1	1				-0.258333	0.258333	0.000476599	0.00667669
SRSF1_HepG2	KDM5A	28	12:395292-395373	27:29	0.404762	0.534483	0.196429	0.227273				0.257772	0.257772	0.000123536	0.00215344
SRSF1_HepG2	DBT	10	1:100672001-100672192	9:11	0.771429	0.657895	0.942857	1				-0.256767	0.256767	2.30139e-05	0.000512789
SRSF1_HepG2	SEC31A	30	4:83752090-83752128	29:31	0.852234	0.874372	0.568849	0.645251				0.256253	0.256253	0	0
SRSF1_HepG2	C1orf128	3	1:24105928-24105971	1:4	1	1	0.8	0.6875				0.25625	0.25625	3.65116e-08	1.65993e-06
SRSF1_HepG2	MYO18A	47	17:27412622-27412666	46:48	0.564356	0.608333	0.279503	0.382812				0.255187	0.255187	2.41528e-08	1.16444e-06
SRSF1_HepG2	MECP2	3	X:153357642-153357765	1:4	0.897436	0.804878	0.666667	0.526316				0.254666	0.254666	0.000149676	0.00252406
SRSF1_HepG2	SMAD2	2	18:45456732-45456926	1:3	0.545455	0.684211	0.842105	0.896552				-0.254496	0.254496	0.00137357	0.0156469
SRSF1_HepG2	FANCL	10	2:58390164-58390209	9:11	0.566667	0.827586	0.903226	1				-0.254486	0.254486	6.9449e-07	2.43453e-05
SRSF1_HepG2	LRIG1	13	3:66449394-66449465	10:14	0.652174	0.8	1	0.96				-0.253913	0.253913	1.57336e-05	0.000365907
SRSF1_HepG2	TMEM126B	3	11:85342189-85342360	2:4	0.628571	0.744681	0.939394	0.941176				-0.253659	0.253659	0.000112957	0.00200186
SRSF1_HepG2	CNPY4	4	7:99720407-99720529	3:5	0.642857	0.758621	1	0.90625				-0.252386	0.252386	6.97131e-05	0.00133967
SRSF1_HepG2	GTSE1	3	22:46704047-46704104	2:4	0.944444	0.862069	0.59375	0.708333				0.252215	0.252215	0.000178869	0.00293363
SRSF1_HepG2	LRRC28	10	15:99903311-99903470	9:11	1	1	0.857143	0.64				0.251429	0.251429	2.02021e-06	6.14735e-05
SRSF1_HepG2	UIMC1	10	5:176395556-176396292	9:11	0.709677	0.571429	0.919355	0.863636				-0.250943	0.250943	0.000200423	0.00321821
SRSF1_HepG2	ATP5SL	6	19:41939177-41939339	5:7	0.393443	0.269663	0.645833	0.516854				-0.249791	0.249791	5.70116e-06	0.000151346
SRSF1_HepG2	CLN3	4	16:28502803-28502881	3:5	0.706667	0.761062	0.989796	0.975904				-0.248985	0.248985	2.69451e-13	2.74324e-11
SRSF1_HepG2	RPS6KC1	3	1:213246212-213246328	2:4	0.25	0.347826	0.1	0				0.248913	0.248913	0.00499504	0.0420797
SRSF1_HepG2	ZNF189	2	9:104161677-104161812	1:3	0.6	0.62406	0.386667	0.34				0.248697	0.248697	2.87312e-06	8.49945e-05
SRSF1_HepG2	MRPS18C	3	4:84379499-84379582	2:4	0.759615	0.754209	0.506173	0.511737				0.247957	0.247957	1.66533e-15	2.15368e-13
SRSF1_HepG2	ARHGAP12	8	10:32128565-32128639	7:9	0.885057	0.840909	0.678571	0.551724				0.247835	0.247835	2.77765e-05	0.000604827
SRSF1_HepG2	SLC35D2	11	9:99084280-99084362	10:12	0.921053	0.891247	0.642458	0.675373				0.247234	0.247234	0	0
SRSF1_HepG2	MTMR6	11	13:25828523-25828572	10:12	0.6875	0.818182	1	1				-0.247159	0.247159	7.64945e-05	0.00145249
SRSF1_HepG2	CDC45	14	22:19496053-19496214	13:15	0.702128	0.803922	1	1				-0.246975	0.246975	1.27936e-05	0.000311538
SRSF1_HepG2	FLNB	33	3:58127585-58127656	32:34	0.673246	0.729128	0.446089	0.462604				0.24684	0.24684	0	0
SRSF1_HepG2	C9orf5	5	9:111853202-111853435	4:6	0.68617	0.725389	0.938356	0.966667				-0.246732	0.246732	4.44089e-16	6.11501e-14
SRSF1_HepG2	AMMECR1L	5	2:128628823-128628933	4:6	0.590909	0.866667	1	0.95				-0.246212	0.246212	7.45791e-05	0.00142034
SRSF1_HepG2	ZNF248	3	10:38145363-38145460	2:4	0.684211	0.714286	0.888889	1				-0.245196	0.245196	0.00542585	0.0445711
SRSF1_HepG2	AS3MT	8	10:104629841-104629968	7:9	0.590164	0.487805	0.805195	0.761905				-0.244565	0.244565	8.8823e-06	0.000223297
SRSF1_HepG2	MR1	5	1:181021371-181021646	4:6	0.793103	0.678899	0.529412	0.454545				0.244023	0.244023	0.000367456	0.00539763
SRSF1_HepG2	ECHDC2	14	1:53363109-53363156	13:15	0.695652	0.643836	0.876404	0.95082				-0.243868	0.243868	4.66606e-07	1.69788e-05
SRSF1_HepG2	HNRPDL	6	4:83347616-83347786	5:7	0.733983	0.769325	0.998547	0.992296				-0.243767	0.243767	0	0
SRSF1_HepG2	TARBP1	19	1:234563063-234563134	18:20	0.723684	0.59596	0.909091	0.897959				-0.243703	0.243703	9.4136e-07	3.15545e-05
SRSF1_HepG2	BIRC6	14	2:32660564-32660653	13:15	0.32	0.47619	0.703704	0.578947				-0.24323	0.24323	0.00511016	0.0427485
SRSF1_HepG2	KRIT1	2	7:91874741-91874909	1:3	0.0333333	0.0512821	0.304348	0.266667				-0.2432	0.2432	0.000765456	0.00985924
SRSF1_HepG2	LSM14A	5	19:34706029-34706205	4:6	0.701413	0.691244	0.931608	0.944039				-0.241495	0.241495	0	0
SRSF1_HepG2	SNX14	19	6:86248556-86248582	18:20	0.337302	0.465986	0.162393	0.158537				0.241179	0.241179	3.33067e-16	4.68743e-14
SRSF1_HepG2	KIF2C	7	1:45218804-45218926	6:8	0.626016	0.69403	0.910714	0.890909				-0.240789	0.240789	2.51079e-07	9.66933e-06
SRSF1_HepG2	TCERG1	6	5:145847904-145847966	5:7	0.294118	0.301075	0.0779221	0.0363636				0.240454	0.240454	8.17542e-08	3.46389e-06
SRSF1_HepG2	MYEF2	13	15:48443297-48443368	12:14	0.151515	0.243902	0.375	0.5				-0.239791	0.239791	0.00280624	0.0273063
SRSF1_HepG2	MFSD8	7	4:128861008-128861152	6:8	0.62963	0.702703	0.954545	0.857143				-0.239678	0.239678	0.00162644	0.0177886
SRSF1_HepG2	NDRG2	6	14:21491023-21491064	5:7	0.604396	0.508333	0.260331	0.373737				0.23933	0.23933	2.5998e-08	1.22865e-06
SRSF1_HepG2	RFC1	17	4:39304680-39304771	16:18	0.802083	0.719512	1	1				-0.239202	0.239202	0	0
SRSF1_HepG2	HNRNPD	7	4:83277690-83277836	6:8	0.305991	0.323794	0.525485	0.581679				-0.23869	0.23869	0	0
SRSF1_HepG2	CASC4	11	15:44695085-44695387	10:13	0.289474	0.345622	0.558824	0.553333				-0.238531	0.238531	1.04587e-11	8.93662e-10
SRSF1_HepG2	GOLGA4	23	3:37378634-37378654	22:24	0.609524	0.643411	0.869792	0.856322				-0.236589	0.236589	4.21885e-15	5.24342e-13
SRSF1_HepG2	ZNF384	10	12:6781516-6781698	9:11	0.322222	0.476744	0.162393	0.166667				0.234953	0.234953	0.0039567	0.0354622
SRSF1_HepG2	ARNTL2	7	12:27540161-27540253	6:8	0.74359	0.786885	1	1				-0.234763	0.234763	0.000594346	0.00792185
SRSF1_HepG2	SNAP47	6	1:227935393-227935934	5:7	0.702703	0.660377	0.878788	0.952381				-0.234044	0.234044	0.000555065	0.00752937
SRSF1_HepG2	ARRB2	2	17:4618308-4618338	1:3	0.71875	0.82	0.523077	0.547619				0.234027	0.234027	0.000739498	0.00958293
SRSF1_HepG2	KIAA1033	20	12:105536905-105537021	19:21	0.803571	0.72973	1	1				-0.233349	0.233349	3.38302e-08	1.55651e-06
SRSF1_HepG2	ARHGEF7	20	13:111932619-111932697	19:21	0.674419	0.784314	0.979167	0.945946				-0.23319	0.23319	5.59986e-06	0.000148911
SRSF1_HepG2	IL17RB	6	3:53889321-53889368	5:7	0.938356	0.869863	0.725	0.617886				0.232666	0.232666	5.31294e-06	0.000142025
SRSF1_HepG2	F2	12	11:46750930-46751115	11:13	0.732865	0.712644	0.953798	0.956235				-0.232262	0.232262	0	0
SRSF1_HepG2	FAM48A	27	13:37584689-37584792	26:28	0.46988	0.6125	0.307692	0.311111				0.231788	0.231788	0.000159587	0.00266164
SRSF1_HepG2	KIF1B	51	1:10434912-10435104	50:52	0.753623	0.783133	1	1				-0.231622	0.231622	2.70861e-12	2.46871e-10
SRSF1_HepG2	FANCA	38	16:89809208-89809346	37:39	0.794521	0.680672	0.957895	0.98				-0.231351	0.231351	2.43388e-10	1.69398e-08
SRSF1_HepG2	TIMM8B	2	11:111956702-111957034	1:3	0.0534591	0.0721003	0.326531	0.260116				-0.230543	0.230543	3.40727e-12	3.01628e-10
SRSF1_HepG2	AL137003.1	2	6:16753464-16753578	1:3	1	1	0.780488	0.758621				0.230446	0.230446	0.00014493	0.00246137
SRSF1_HepG2	SRRM1	15	1:24989674-24989715	14:16	0.365854	0.586957	0.711864	0.701754				-0.230404	0.230404	0.00101451	0.0122974
SRSF1_HepG2	EFCAB2	3	1:245180544-245180628	2:4	0.705882	0.833333	1	1				-0.230392	0.230392	0.000177122	0.00290748
SRSF1_HepG2	FAM113A	8	20:2816685-2816960	7:9	0.606061	0.711864	0.892857	0.885714				-0.230323	0.230323	3.51366e-08	1.60897e-06
SRSF1_HepG2	DHRS11	3	17:34951401-34951610	2:4	0.761905	0.777778	1	1				-0.230159	0.230159	2.49594e-08	1.18852e-06
SRSF1_HepG2	FGGY	15	1:60106952-60107023	14:16	0.371429	0.147059	0.015873	0.0428571				0.229879	0.229879	0.000172195	0.00283633
SRSF1_HepG2	MST1	9	3:49723495-49723625	8:10	0.592593	0.818182	0.947368	0.921739				-0.229167	0.229167	8.56525e-06	0.000217138
SRSF1_HepG2	RBM42	5	19:36123838-36123903	4:6	0.878788	0.877551	0.62069	0.677419				0.229115	0.229115	0.00149762	0.0166654
SRSF1_HepG2	YAP1	5	11:102056749-102056868	4:6	0.6875	0.627737	0.864286	0.908257				-0.228653	0.228653	5.72098e-13	5.58671e-11
SRSF1_HepG2	MYNN	2	3:169491819-169491885	1:3	0.444444	0.28169	0.148936	0.12				0.228599	0.228599	0.000578118	0.00777595
SRSF1_HepG2	TMC6	14	17:76116734-76116913	13:15	0.653846	0.694444	0.921182	0.88172				-0.227306	0.227306	6.92466e-08	2.97468e-06
SRSF1_HepG2	ORMDL1	3	2:190647740-190647849	2:4	0.666667	0.787879	0.909091	1				-0.227273	0.227273	0.00107389	0.0129272
SRSF1_HepG2	ASPM	18	1:197069561-197074315	17:19	0.649123	0.622951	0.875	0.85				-0.226463	0.226463	0.00417197	0.0370197
SRSF1_HepG2	COL27A1	36	9:117031521-117031574	35:37	0.787879	0.679487	0.951613	0.967742				-0.225994	0.225994	5.95122e-11	4.63034e-09
SRSF1_HepG2	PION	17	7:76982889-76982958	16:18	0.8	0.702703	0.954545	1				-0.225921	0.225921	0.000789084	0.0100889
SRSF1_HepG2	SRSF2	3	17:74731854-74731957	2:4	0.0377574	0.0295964	0.24295	0.27381				-0.224703	0.224703	0	0
SRSF1_HepG2	STYX	8	14:53224592-53224642	7:9	0.611111	0.788462	0.907407	0.941176				-0.224506	0.224506	0.000190573	0.00308333
SRSF1_HepG2	EPB41L1	27	20:34802279-34802362	26:28	0.552083	0.617886	0.363158	0.358209				0.224301	0.224301	6.20032e-07	2.19767e-05
SRSF1_HepG2	PITPNM2	8	12:123488941-123489036	7:9	0.8125	0.73913	1	1				-0.224185	0.224185	0.000389456	0.00566858
SRSF1_HepG2	RFXANK	5	19:19307995-19308060	4:6	0.630435	0.6625	0.935484	0.805556				-0.224052	0.224052	5.92368e-08	2.5768e-06
SRSF1_HepG2	CDC14B	14	9:99277931-99278074	13:15	0.138462	0.12987	0.414286	0.301887				-0.22392	0.22392	2.6092e-05	0.000572709
SRSF1_HepG2	RAI14	15	5:34813679-34813765	14:16	0.779661	0.754386	0.534884	0.551724				0.22372	0.22372	0.00178759	0.0192324
SRSF1_HepG2	CCNYL1	5	2:208598671-208598771	4:6	0.894737	0.947368	0.735849	0.659574				0.223341	0.223341	4.78278e-09	2.67668e-07
SRSF1_HepG2	BOK	4	2:242509540-242509703	3:5	0.785714	0.64	0.893939	0.978261				-0.223243	0.223243	0.000678707	0.00889757
SRSF1_HepG2	C16orf68	11	16:8738414-8738582	10:12	0.75	0.771429	0.967742	1				-0.223157	0.223157	0.000223072	0.00351697
SRSF1_HepG2	COL27A1	26	9:117012895-117012948	25:27	0.692308	0.764706	0.954128	0.94898				-0.223047	0.223047	1.58655e-06	4.96186e-05
SRSF1_HepG2	KLC4	6	6:43028256-43028343	5:7	0.928571	0.956522	0.66129	0.777778				0.223013	0.223013	8.01478e-05	0.00150395
SRSF1_HepG2	TMEM150A	5	2:85827468-85827535	4:6	0.834532	0.895425	0.651822	0.63253				0.222803	0.222803	4.68866e-11	3.72369e-09
SRSF1_HepG2	MATR3	11	5:138651386-138651427	10:12	0.729072	0.74477	0.971774	0.947522				-0.222727	0.222727	0	0
SRSF1_HepG2	EXOSC3	3	9:37781983-37782134	2:4	0.710744	0.697531	0.949495	0.902778				-0.221999	0.221999	1.61063e-09	9.69419e-08
SRSF1_HepG2	C16orf67	2	16:31712984-31713179	1:3	0.287879	0.333333	0.447368	0.617647				-0.221902	0.221902	0.00106264	0.0128321
SRSF1_HepG2	RAB17	4	2:238486647-238486798	3:5	0.990521	0.992126	0.764977	0.773994				0.221838	0.221838	0	0
SRSF1_HepG2	RINL	3	19:39366971-39367130	2:4	0.625	0.66129	0.967742	0.761905				-0.221678	0.221678	0.00230271	0.0234686
SRSF1_HepG2	KIF13A	27	6:17790103-17790141	26:28	0.803279	0.75	0.596774	0.513514				0.221495	0.221495	0.000749807	0.00969683
SRSF1_HepG2	NF1	31	17:29576973-29579821	30:32	0.171429	0.3	0.030303	0				0.220563	0.220563	0.000410567	0.00593524
SRSF1_HepG2	PI4KAP2	15	22:21830933-21831069	14:16	0.634146	0.791667	0.538462	0.446809				0.220271	0.220271	0.00250424	0.0250424
SRSF1_HepG2	SLC2A10	4	20:45357992-45358127	3:5	1	1	0.765625	0.794118				0.220129	0.220129	0.000403307	0.00583911
SRSF1_HepG2	MPHOSPH9	12	12:123686711-123686866	11:13	0.71875	0.842105	1	1				-0.219572	0.219572	5.70737e-05	0.00112734
SRSF1_HepG2	KCTD3	6	1:215751272-215751424	5:7	0.804688	0.744186	0.987805	1				-0.219466	0.219466	1.00945e-11	8.66405e-10
SRSF1_HepG2	ACOT9	6	X:23752458-23752484	5:7	0.486486	0.48	0.317073	0.212121				0.218646	0.218646	0.00111039	0.0132687
SRSF1_HepG2	PHKB	2	16:47497793-47497904	1:3	0.666667	0.683333	0.46789	0.446429				0.217841	0.217841	1.74785e-07	6.94063e-06
SRSF1_HepG2	SETX	27	9:135144790-135144876	26:28	0.188406	0.28	0.442308	0.461538				-0.21772	0.21772	0.00050238	0.00696779
SRSF1_HepG2	PARD3	14	10:34661426-34661464	13:15	0.682119	0.68254	0.507576	0.422414				0.217335	0.217335	7.09548e-08	3.03142e-06
SRSF1_HepG2	GOLGA4	7	3:37327505-37327552	6:9	0.92381	0.90604	0.637363	0.758065				0.217211	0.217211	1.61061e-08	8.02789e-07
SRSF1_HepG2	RFFL	11	17:33344542-33344625	10:12	0.733333	0.803279	0.992308	0.978723				-0.21721	0.21721	1.36187e-10	9.9111e-09
SRSF1_HepG2	TBC1D8B	10	X:106082538-106082687	8:11	1	0.939394	0.777778	0.727273				0.217172	0.217172	9.79448e-05	0.00178369
SRSF1_HepG2	NUBP2	3	16:1836758-1836956	2:4	0.522727	0.6	0.827586	0.729167				-0.217013	0.217013	0.00132418	0.0152095
SRSF1_HepG2	ANKHD1	33	5:139914947-139915123	30:34	0.706294	0.7375	0.975	0.902439				-0.216823	0.216823	2.03559e-11	1.67936e-09
SRSF1_HepG2	ACSF2	14	17:48549789-48549940	13:15	0.804598	0.761905	1	1				-0.216749	0.216749	0	0
SRSF1_HepG2	SORBS1	30	10:97110966-97111133	29:32	0.756757	0.695652	0.581818	0.4375				0.216545	0.216545	0.0022935	0.0233995
SRSF1_HepG2	NLE1	6	17:33464562-33464659	5:7	0.805556	0.761905	1	1				-0.21627	0.21627	1.42994e-08	7.18349e-07
SRSF1_HepG2	PAN2	26	12:56712021-56712218	25:27	0.813953	0.62963	0.945055	0.930556				-0.216014	0.216014	3.44073e-06	9.87341e-05
SRSF1_HepG2	RNMTL1	2	17:686323-686567	1:3	0.736842	0.813953	0.982143	1				-0.215674	0.215674	1.08762e-06	3.55847e-05
SRSF1_HepG2	SH3YL1	18	2:224864-224920	17:19	0.565789	0.5	0.372414	0.262626				0.215375	0.215375	3.27254e-05	0.000698136
SRSF1_HepG2	ZNF232	5	17:5012221-5012347	4:6	0.6	0.725	0.846154	0.909091				-0.215122	0.215122	0.00629819	0.0497307
SRSF1_HepG2	IGF2BP2	11	3:185390329-185390457	10:12	0.509804	0.448276	0.7125	0.675676				-0.215048	0.215048	1.55878e-08	7.78982e-07
SRSF1_HepG2	TMEM62	4	15:43430772-43430817	3:5	0.76	0.740741	0.930233	1				-0.214746	0.214746	6.45652e-05	0.00125715
SRSF1_HepG2	POP4	3	19:30101316-30101539	2:4	0.758621	0.75641	1	0.944444				-0.214707	0.214707	1.22235e-05	0.000299178
SRSF1_HepG2	ZHX1	4	8:124265562-124268411	3:5	0.470588	0.590909	0.732143	0.758621				-0.214633	0.214633	0.00247103	0.0247491
SRSF1_HepG2	C8orf76	4	8:124265562-124268411	3:5	0.470588	0.590909	0.732143	0.758621				-0.214633	0.214633	0.00247103	0.0247491
SRSF1_HepG2	FYN	12	6:112020718-112020873	11:13	0.311688	0.27907	0.0869565	0.0784314				0.212685	0.212685	4.69288e-06	0.000127769
SRSF1_HepG2	TCF3	19	19:1612206-1612432	18:20	0.175	0.235849	0.411111	0.424658				-0.21246	0.21246	2.64339e-05	0.000577562
SRSF1_HepG2	SAPS2	10	22:50857296-50857408	9:11	0.782609	0.763158	0.975248	0.994012				-0.211746	0.211746	1.12133e-14	1.32483e-12
SRSF1_HepG2	FGFR1OP	7	6:167426996-167427055	6:8	0.131148	0.138889	0.293478	0.4				-0.211721	0.211721	1.0984e-07	4.56036e-06
SRSF1_HepG2	ENTPD6	11	20:25201868-25201969	10:12	0.626984	0.702703	0.879599	0.872951				-0.211431	0.211431	6.30385e-12	5.50939e-10
SRSF1_HepG2	MELK	3	9:36583624-36583709	2:4	0.513158	0.523077	0.846154	0.612903				-0.211411	0.211411	0.00314689	0.0298578
SRSF1_HepG2	ISOC2	3	19:55967003-55967212	2:4	0.857143	0.797753	0.596026	0.636364				0.211253	0.211253	2.21102e-05	0.000494565
SRSF1_HepG2	HRAS	5	11:533277-533358	4:6	0.0243902	0.0615385	0.257143	0.25				-0.210607	0.210607	6.55266e-05	0.00127003
SRSF1_HepG2	SS18L1	2	20:60729337-60729521	1:3	0.448276	0.508197	0.270833	0.264706				0.210467	0.210467	0.00298159	0.0286054
SRSF1_HepG2	ZNF76	13	6:35261528-35261692	12:14	0.561404	0.641509	0.8	0.823529				-0.210308	0.210308	0.00205472	0.0214004
SRSF1_HepG2	AZIN1	3	8:103862227-103862372	2:4	0.65873	0.598726	0.41358	0.423529				0.210173	0.210173	2.33901e-06	7.02805e-05
SRSF1_HepG2	KIAA0101	3	15:64668942-64669104	2:4	0.552326	0.568966	0.763533	0.777778				-0.21001	0.21001	0	0
SRSF1_HepG2	ZNF33B	6	10:43109730-43109806	4:7	0.384615	0.509434	0.22449	0.25				0.20978	0.20978	0.000521901	0.00719164
SRSF1_HepG2	SRA1	3	5:139931567-139931769	2:4	0.706897	0.764706	0.918919	0.971429				-0.209373	0.209373	4.10514e-05	0.000843956
SRSF1_HepG2	MRPL18	2	6:160211700-160211819	1:3	0.604651	0.672414	0.403846	0.454545				0.209337	0.209337	4.0329e-05	0.000832683
SRSF1_HepG2	SLC7A6	7	16:68321226-68321338	6:8	0.277778	0.168831	0.0285714	0				0.209019	0.209019	0.000498259	0.00692067
SRSF1_HepG2	DNAJC19	5	3:180704731-180704810	4:6	0.910569	0.946746	0.722656	0.71875				0.207954	0.207954	1.01574e-12	9.72066e-11
SRSF1_HepG2	SLC35F5	15	2:114475330-114475427	14:16	0.751462	0.72846	0.942935	0.952703				-0.207858	0.207858	0	0
SRSF1_HepG2	FAM60A	3	12:31457916-31458066	2:4	0.685185	0.538462	0.769231	0.869565				-0.207575	0.207575	0.00612848	0.0486718
SRSF1_HepG2	SERPINA11	3	14:94912668-94912941	2:4	0.770492	0.777778	0.978538	0.983929				-0.207098	0.207098	0	0
SRSF1_HepG2	TRAPPC10	17	21:45504003-45504144	16:18	0.777778	0.809524	1	1				-0.206349	0.206349	0.000783702	0.0100469
SRSF1_HepG2	FNBP4	12	11:47753669-47753771	11:13	0.389831	0.411765	0.626866	0.587302				-0.206286	0.206286	0.00084526	0.0106366
SRSF1_HepG2	CLSTN1	11	1:9797556-9797612	10:12	0.258706	0.279476	0.0658683	0.0600858				0.206114	0.206114	0	0
SRSF1_HepG2	C17orf101	9	17:80352207-80352419	8:10	0.622222	0.648148	0.831169	0.851064				-0.205931	0.205931	0.000811321	0.0103112
SRSF1_HepG2	CSDA	6	12:10862507-10862713	5:7	0.418478	0.46798	0.635965	0.662252				-0.205879	0.205879	8.29472e-09	4.45958e-07
SRSF1_HepG2	SNAPIN	2	1:153631614-153631660	1:3	0.966667	1	0.855072	0.7				0.205797	0.205797	5.30886e-06	0.000142025
SRSF1_HepG2	FAS	7	10:90770510-90770572	6:8	0.973684	0.970297	0.666667	0.866667				0.205324	0.205324	8.00106e-05	0.00150285
SRSF1_HepG2	STAMBPL1	20	10:90770510-90770572	19:21	0.973684	0.970297	0.666667	0.866667				0.205324	0.205324	8.00106e-05	0.00150285
SRSF1_HepG2	TCF25	19	16:89975374-89975491	18:20	0.128	0.149351	0.314815	0.373134				-0.205299	0.205299	6.98431e-09	3.81942e-07
SRSF1_HepG2	SPAG9	29	17:49053224-49053262	28:30	0.183673	0.317881	0.0410959	0.05				0.205229	0.205229	1.68754e-14	1.91121e-12
SRSF1_HepG2	SMAP1	9	6:71501392-71501472	8:10	0.27907	0.166667	0.016129	0.0192308				0.205188	0.205188	2.66264e-07	1.0213e-05
SRSF1_HepG2	SPEN	3	1:16202697-16203173	2:4	0.64	0.95	1	1				-0.205	0.205	0.000225718	0.00355575
SRSF1_HepG2	PLCB1	35	20:8782703-8782820	34:36	0.25641	0.29	0.486772	0.469565				-0.204964	0.204964	1.17193e-05	0.000288313
SRSF1_HepG2	CD46	13	1:207963598-207963690	12:14	0.393298	0.422721	0.213072	0.195568				0.20369	0.20369	0	0
SRSF1_HepG2	ZNF516	7	18:74082483-74082550	6:8	1	0.969697	0.8125	0.75				0.203598	0.203598	0.0005568	0.00754756
SRSF1_HepG2	MPV17L	2	16:15494644-15494714	1:3	0.214286	0.241935	0.424242	0.439024				-0.203523	0.203523	0.00111173	0.0132687
SRSF1_HepG2	TM2D1	6	1:62152464-62152593	5:7	0.315217	0.339286	0.122699	0.125				0.203402	0.203402	7.43151e-08	3.16791e-06
SRSF1_HepG2	IFT46	4	11:118428453-118428605	3:5	0.0816327	0.0847458	0.297297	0.275862				-0.20339	0.20339	0.00051525	0.0071205
SRSF1_HepG2	PPP2R5C	19	14:102384168-102384284	18:20	0.2	0.328125	0.492537	0.44186				-0.203136	0.203136	0.0028291	0.0274868
SRSF1_HepG2	ZMYND11	6	10:267135-267296	5:7	0.961165	0.964602	0.710526	0.809524				0.202858	0.202858	2.14927e-08	1.04408e-06
SRSF1_HepG2	FBXO38	15	5:147806776-147807510	14:16	0.729167	0.766667	0.939394	0.960784				-0.202172	0.202172	1.541e-05	0.000360132
SRSF1_HepG2	TFR2	12	7:100226876-100226995	11:13	0.823529	0.697674	0.961111	0.963504				-0.201705	0.201705	6.65139e-08	2.86729e-06
SRSF1_HepG2	PCM1	7	8:17797551-17797667	6:8	0.324786	0.395683	0.533333	0.589744				-0.201304	0.201304	0.000623481	0.00824701
SRSF1_HepG2	RBM39	3	20:34328447-34328519	2:4	0.557252	0.502722	0.751391	0.710875				-0.201146	0.201146	0	0
SRSF1_HepG2	BPTF	28	17:65959449-65959622	27:29	0.43038	0.493827	0.636364	0.689655				-0.200906	0.200906	0.000336723	0.00504689
SRSF1_HepG2	TIA1	10	2:70443340-70443424	9:11	0.8	0.788079	0.989446	1				-0.200683	0.200683	0	0
SRSF1_HepG2	ATXN2L	23	16:28847647-28847811	22:24	0.366337	0.520833	0.224	0.2625				0.200335	0.200335	3.9216e-05	0.000813211
SRSF1_HepG2	OMA1	5	1:58999625-58999732	4:6	0.733333	0.866667	1	1				-0.2	0.2	3.87978e-05	0.000805413
SRSF1_HepG2	ZNF498	3	7:99216671-99216755	2:4	1	1	1	0.6				0.2	0.2	3.14092e-05	0.000675474
SRSF1_HepG2	ARHGAP21	25	10:24880154-24880259	24:27	0.716981	0.883333	1	1				-0.199843	0.199843	1.84109e-06	5.65626e-05
SRSF1_HepG2	TMEM11	3	17:21114249-21114540	1:4	0.537313	0.452632	0.257576	0.333333				0.199518	0.199518	0.000953905	0.0117413
SRSF1_HepG2	RFC2	6	7:73660992-73661093	5:7	0.786517	0.763441	0.948718	1				-0.19938	0.19938	3.74524e-06	0.000105418
SRSF1_HepG2	ACO1	2	9:32386371-32386436	1:3	0.283019	0.177778	0.025	0.037037				0.19938	0.19938	3.25452e-05	0.000695218
SRSF1_HepG2	MXRA7	4	17:74679929-74680009	3:5	0.319527	0.254237	0.0961887	0.0798005				0.198887	0.198887	0	0
SRSF1_HepG2	PKDCC	2	2:42280379-42280501	1:3	0.714286	0.847458	0.983871	0.97561				-0.198869	0.198869	4.52354e-06	0.00012351
SRSF1_HepG2	MEF2D	5	1:156450626-156450763	4:6	0.833333	0.769231	1	1				-0.198718	0.198718	0.00381504	0.0344921
SRSF1_HepG2	STX16	4	20:57244347-57244509	3:5	0.393333	0.380488	0.593548	0.57732				-0.198523	0.198523	1.24403e-06	4.0018e-05
SRSF1_HepG2	SLC30A5	2	5:68396634-68396756	1:3	0.965517	0.9	0.814815	0.653846				0.198428	0.198428	0.0011084	0.0132687
SRSF1_HepG2	ITIH1	18	3:52822248-52822361	17:19	0.72	0.734694	0.912467	0.938567				-0.19817	0.19817	1.3601e-10	9.9111e-09
SRSF1_HepG2	PCBP2	15	12:53861589-53861627	14:16	0.874616	0.850676	0.663379	0.666035				0.197939	0.197939	0	0
SRSF1_HepG2	MGRN1	15	16:4730033-4730098	14:16	0.717391	0.653846	0.575758	0.4				0.19774	0.19774	0.00497384	0.0419381
SRSF1_HepG2	ANKRA2	8	5:72849231-72849311	7:9	0.851852	0.72973	0.976744	1				-0.197581	0.197581	8.6462e-06	0.0002189
SRSF1_HepG2	BCOR	6	X:39930890-39930943	5:7	0.45	0.403509	0.594595	0.653846				-0.197466	0.197466	0.00306341	0.0292292
SRSF1_HepG2	SRRM2	2	16:2806335-2806607	1:3	0.740741	0.74026	0.95	0.925926				-0.197463	0.197463	0.000350042	0.00520981
SRSF1_HepG2	HRSP12	2	8:99120874-99120979	1:3	0.736264	0.812183	0.978947	0.963855				-0.197178	0.197178	0	0
SRSF1_HepG2	STK19	5	6:31947191-31947330	4:6	0.789474	0.728395	0.944444	0.967742				-0.197159	0.197159	1.61795e-05	0.000373553
SRSF1_HepG2	C4A	3	6:31947191-31947330	2:4	0.789474	0.728395	0.944444	0.967742				-0.197159	0.197159	1.61795e-05	0.000373553
SRSF1_HepG2	TESK2	12	1:45811549-45811666	11:13	0.833333	0.772727	1	1				-0.19697	0.19697	6.55585e-05	0.00127003
SRSF1_HepG2	CLSTN1	3	1:9816539-9816568	2:4	0.283951	0.152174	0.0176991	0.0253165				0.196554	0.196554	9.74398e-10	6.13486e-08
SRSF1_HepG2	SNX25	10	4:186241887-186242018	9:11	0.761905	0.846154	1	1				-0.195971	0.195971	6.00494e-07	2.13633e-05
SRSF1_HepG2	INTS3	15	1:153733496-153733585	14:16	0	0.0625	0.193548	0.26087				-0.195959	0.195959	0.000488105	0.00680432
SRSF1_HepG2	SLC43A1	7	11:57265226-57265318	6:8	0.704545	0.69697	0.865217	0.926667				-0.195184	0.195184	4.29747e-06	0.000118011
SRSF1_HepG2	C17orf62	4	17:80405456-80406119	3:5	0.905405	0.957746	0.673077	0.8				0.195037	0.195037	6.64463e-05	0.00128333
SRSF1_HepG2	PQLC1	7	18:77690228-77690311	6:8	0.133333	0.37037	0.0470588	0.0666667				0.194989	0.194989	0.00038628	0.00563951
SRSF1_HepG2	C10orf4	8	10:95452403-95452486	7:9	0.858974	0.752	1	1				-0.194513	0.194513	1.67089e-13	1.73808e-11
SRSF1_HepG2	EED	10	11:85981125-85981199	9:11	0.240964	0.232558	0.0851064	0				0.194208	0.194208	0.000168981	0.002793
SRSF1_HepG2	CYP19A1	11	15:51514546-51514722	10:12	0.766667	0.773333	0.961165	0.967213				-0.194189	0.194189	2.19272e-07	8.54761e-06
SRSF1_HepG2	MAST2	25	1:46494440-46494605	24:26	0.775	0.836735	1	1				-0.194133	0.194133	2.52296e-06	7.49836e-05
SRSF1_HepG2	FGFR1OP	4	6:167417211-167417299	3:5	0.931507	0.923497	0.785714	0.681818				0.193736	0.193736	6.66125e-07	2.348e-05
SRSF1_HepG2	SECISBP2L	8	15:49311615-49311749	7:9	0.92	0.903226	0.769231	0.666667				0.193664	0.193664	0.00229816	0.0234346
SRSF1_HepG2	ZEB1	11	10:31784705-31784767	10:12	0.75	0.863636	1	1				-0.193182	0.193182	0.000209232	0.00334283
SRSF1_HepG2	AGL	15	1:100345479-100345602	14:16	0.68	0.857143	0.923077	1				-0.192967	0.192967	0.00338422	0.0315816
SRSF1_HepG2	UGGT2	36	13:96513042-96513137	35:37	0.677419	0.780488	0.883117	0.96				-0.192605	0.192605	0.000790673	0.0101025
SRSF1_HepG2	BCLAF1	11	6:136590279-136590441	10:12	0.0109091	0.0516717	0.254902	0.192771				-0.192546	0.192546	6.77236e-15	8.25624e-13
SRSF1_HepG2	TAF9B	4	X:77393246-77393380	3:5	0.818182	0.797101	1	1				-0.192358	0.192358	5.15517e-05	0.00103319
SRSF1_HepG2	CASK	20	X:41414853-41414888	19:21	0.671429	0.72	0.952381	0.823529				-0.192241	0.192241	0.000784793	0.0100542
SRSF1_HepG2	CRYZ	8	1:75172787-75172888	7:9	0.363014	0.329146	0.524306	0.552239				-0.192192	0.192192	0	0
SRSF1_HepG2	DHTKD1	13	10:12154899-12155063	12:14	0.8	0.774194	0.958333	1				-0.19207	0.19207	0.00172483	0.018668
SRSF1_HepG2	ASB3	4	2:53992514-53992722	3:5	0.848101	0.7375	0.987013	0.981481				-0.191447	0.191447	1.65254e-08	8.19419e-07
SRSF1_HepG2	KTN1	44	14:56139890-56139973	43:45	0.50783	0.50947	0.31484	0.319685				0.191387	0.191387	0	0
SRSF1_HepG2	FGFR3	9	4:1805419-1805563	8:10	0.693182	0.826923	0.606965	0.532051				0.190544	0.190544	8.52658e-06	0.000216732
SRSF1_HepG2	AHCTF1	14	1:247057961-247058050	13:15	0.726316	0.892857	1	1				-0.190414	0.190414	1.43873e-09	8.76986e-08
SRSF1_HepG2	AGAP1	13	2:236839409-236839567	12:14	0.540541	0.473684	0.342466	0.292308				0.189726	0.189726	0.00405555	0.0362387
SRSF1_HepG2	MFF	10	2:228217230-228217289	9:11	0.976945	0.955189	0.794979	0.757732				0.189711	0.189711	0	0
SRSF1_HepG2	C9orf21	5	9:99408175-99408306	4:6	0.59322	0.5375	0.697368	0.8125				-0.189574	0.189574	0.00144055	0.0161999
SRSF1_HepG2	CHID1	12	11:893427-893519	11:13	0.885714	0.865854	0.666667	0.705882				0.189509	0.189509	1.59189e-05	0.000369319
SRSF1_HepG2	EIF4A2	11	3:186506099-186506205	10:12	0.225922	0.250511	0.0486076	0.0491493				0.189338	0.189338	0	0
SRSF1_HepG2	ZNF146	2	19:36709024-36709097	1:3	0.413793	0.57732	0.742857	0.625				-0.188372	0.188372	0.000817636	0.0103669
SRSF1_HepG2	NGLY1	13	3:25761505-25761682	12:14	0.75	0.659574	0.888889	0.896907				-0.188111	0.188111	3.50518e-06	9.95387e-05
SRSF1_HepG2	EHMT1	8	9:140646783-140646860	7:9	0.725	0.634615	0.85	0.885714				-0.188049	0.188049	0.00267726	0.0263188
SRSF1_HepG2	ARID4A	22	14:58832742-58832948	21:23	0.8	0.824561	1	1				-0.187719	0.187719	1.88282e-06	5.77518e-05
SRSF1_HepG2	KAT5	5	11:65480819-65480974	4:6	0.102564	0.125	0.283019	0.319149				-0.187302	0.187302	0.00012878	0.00223468
SRSF1_HepG2	ENOSF1	14	18:678696-678737	13:15	0.647059	0.681319	0.857143	0.844444				-0.186605	0.186605	0.00120611	0.0140762
SRSF1_HepG2	POLB	2	8:42196530-42196587	1:3	0.703448	0.751773	0.535211	0.546875				0.186568	0.186568	0.000198416	0.00319133
SRSF1_HepG2	RIT1	2	1:155880447-155880595	1:3	0.842105	0.740741	0.974026	0.981818				-0.186499	0.186499	3.5697e-05	0.00075087
SRSF1_HepG2	PAM	24	5:102360835-102361042	23:25	0.440758	0.455224	0.638889	0.629787				-0.186347	0.186347	7.73288e-09	4.19284e-07
SRSF1_HepG2	C1orf43	2	1:154192312-154192413	1:3	0.472803	0.481229	0.678776	0.6475				-0.186122	0.186122	1.12602e-11	9.57869e-10
SRSF1_HepG2	BOLA3	3	2:74369399-74369487	2:4	0.855372	0.869198	0.658307	0.694118				0.186073	0.186073	2.58937e-12	2.38272e-10
SRSF1_HepG2	MMS19	8	10:99236592-99236720	7:9	0.831325	0.782178	0.985612	1				-0.186054	0.186054	1.04983e-12	9.99686e-11
SRSF1_HepG2	DZIP1	17	13:96251619-96251678	16:18	0.854545	0.76	0.657143	0.585366				0.186018	0.186018	0.00335443	0.0314017
SRSF1_HepG2	MAST2	13	1:46466631-46466651	12:14	0.172414	0.25	0.0222222	0.0285714				0.18581	0.18581	8.43618e-05	0.00157224
SRSF1_HepG2	FAM184A	4	6:119345124-119345978	3:5	0.777778	0.851064	1	1				-0.185579	0.185579	0.00194325	0.0205718
SRSF1_HepG2	CTTN	11	11:70267576-70267686	10:12	0.697368	0.71123	0.873684	0.905063				-0.185075	0.185075	1.10034e-12	1.0426e-10
SRSF1_HepG2	SLC25A36	5	3:140685842-140685878	4:6	0.346154	0.261905	0.0952381	0.142857				0.184982	0.184982	0.00216205	0.0223201
SRSF1_HepG2	ANKHD1	11	5:139851824-139851880	10:12	0.527778	0.608696	0.736842	0.769231				-0.1848	0.1848	0.00181117	0.0194009
SRSF1_HepG2	PDK1	11	2:173433469-173433545	10:12	0.945455	0.971014	0.825203	0.721854				0.184706	0.184706	0.000131064	0.0022661
SRSF1_HepG2	AFMID	6	17:76200737-76200822	5:7	0.380952	0.367188	0.532751	0.583815				-0.184213	0.184213	1.39949e-05	0.000334827
SRSF1_HepG2	TRNAU1AP	4	1:28887380-28887772	3:5	0.0659341	0.04	0.258824	0.215385				-0.184137	0.184137	1.07406e-06	3.53222e-05
SRSF1_HepG2	UEVLD	4	11:18596894-18596959	3:5	0.961538	1	0.684211	0.909091				0.184119	0.184119	0.00376199	0.0340769
SRSF1_HepG2	SAP130	16	2:128735559-128735663	15:17	0.784615	0.706522	0.666667	0.456522				0.183974	0.183974	0.0012105	0.0141136
SRSF1_HepG2	DNMT3A	9	2:25472526-25472593	8:10	0.247059	0.217822	0.355556	0.477273				-0.183974	0.183974	0.00105921	0.0127987
SRSF1_HepG2	EXOSC2	4	9:133573549-133573638	3:5	0.771429	0.792793	0.968254	0.962963				-0.183498	0.183498	4.25143e-06	0.000117251
SRSF1_HepG2	SLC30A5	10	5:68412221-68412429	9:11	0.823529	0.809524	1	1				-0.183473	0.183473	2.66259e-07	1.0213e-05
SRSF1_HepG2	BTBD3	5	20:11899734-11899824	3:7	0.769231	0.864198	1	1				-0.183286	0.183286	1.23004e-08	6.27815e-07
SRSF1_HepG2	MAN2C1	14	15:75652906-75653029	13:15	0.842105	0.791667	1	1				-0.183114	0.183114	3.37783e-05	0.000717554
SRSF1_HepG2	NINL	7	20:25490306-25490425	6:8	0.181818	0.243902	0.028169	0.031746				0.182903	0.182903	1.5214e-05	0.000356623
SRSF1_HepG2	NUMA1	20	11:71723447-71723488	19:21	0.425926	0.386076	0.240741	0.205882				0.182689	0.182689	1.66448e-05	0.000382451
SRSF1_HepG2	CABIN1	6	22:24437587-24437721	5:7	0.717391	0.823529	0.934783	0.971429				-0.182645	0.182645	3.06667e-05	0.000660991
SRSF1_HepG2	ESYT2	16	7:158545472-158545534	15:17	0.339901	0.340909	0.170732	0.144828				0.182626	0.182626	3.55886e-09	2.04554e-07
SRSF1_HepG2	SLC2A9	6	4:9998405-9998565	5:7	0.647059	0.696629	0.833333	0.875				-0.182323	0.182323	1.33077e-05	0.000322825
SRSF1_HepG2	MTO1	4	6:74183088-74183377	3:5	0.736842	0.857143	0.958333	1				-0.182174	0.182174	1.49721e-05	0.000352479
SRSF1_HepG2	ITGB1BP1	7	2:9547578-9547727	6:8	0.796226	0.730878	0.956072	0.935252				-0.18211	0.18211	0	0
SRSF1_HepG2	HEATR5B	34	2:37217791-37217942	33:35	0.921569	0.909091	0.633333	0.833333				0.181996	0.181996	0.00273605	0.0267594
SRSF1_HepG2	DAP3	7	1:155691308-155691409	6:8	0.782443	0.804054	0.987805	0.9625				-0.181904	0.181904	0	0
SRSF1_HepG2	CNNM2	7	10:104831531-104831596	6:8	0.170732	0.384615	0.142857	0.0487805				0.181855	0.181855	0.00151159	0.0167624
SRSF1_HepG2	PUM2	14	2:20478344-20478580	13:15	0.793478	0.796296	0.584615	0.642105				0.181527	0.181527	6.181e-05	0.00120966
SRSF1_HepG2	SMAD9	5	13:37441410-37441520	4:6	1	1	0.9375	0.7				0.18125	0.18125	0.000185843	0.00301955
SRSF1_HepG2	C13orf23	2	13:39608268-39608333	1:3	0.946429	0.974684	0.676471	0.882353				0.181144	0.181144	7.73659e-05	0.00146758
SRSF1_HepG2	TATDN2	7	3:10320348-10320444	6:8	0.0842105	0.0607735	0.247863	0.259259				-0.181069	0.181069	0.000135224	0.00232125
SRSF1_HepG2	CCNL1	4	3:156874800-156874872	3:5	0.623932	0.618705	0.476744	0.403846				0.181023	0.181023	5.98781e-05	0.00117545
SRSF1_HepG2	AP001011.3	44	18:2778167-2778237	43:45	0.829787	0.790909	1	0.982456				-0.18088	0.18088	4.68216e-09	2.62805e-07
SRSF1_HepG2	SH2B1	7	16:28883101-28883304	6:8	0.661972	0.8	0.886076	0.936508				-0.180306	0.180306	3.56408e-05	0.00075087
SRSF1_HepG2	FAM48A	5	13:37622701-37622736	4:6	0.47619	0.326733	0.472727	0.688889				-0.179347	0.179347	0.00231661	0.0235775
SRSF1_HepG2	CDC45	4	22:19470213-19470350	3:5	0.740741	0.857143	0.956522	1				-0.179319	0.179319	0.00235323	0.0238564
SRSF1_HepG2	C5orf4	4	5:154214185-154214288	3:5	0.72	0.821429	0.955975	0.943396				-0.178971	0.178971	0.00014472	0.00245998
SRSF1_HepG2	C11orf61	2	11:124644615-124644870	1:3	0.8	0.842105	1	1				-0.178947	0.178947	0.0023659	0.0239467
SRSF1_HepG2	ECHDC1	5	6:127637595-127637647	4:6	0.827381	0.843434	0.66805	0.645				0.178883	0.178883	2.15461e-12	2.0019e-10
SRSF1_HepG2	FXYD2	4	11:117693121-117693195	3:5	0.804878	0.825	0.993548	0.993289				-0.178479	0.178479	1.11022e-16	1.60982e-14
SRSF1_HepG2	RAB11FIP5	4	2:73306779-73307147	3:5	0.0606061	0.151515	0.282609	0.285714				-0.178101	0.178101	0.00443376	0.0384462
SRSF1_HepG2	BX276089.1	4	6:150018228-150018322	3:5	0.230769	0.125	0	0				0.177885	0.177885	0.00473917	0.0404043
SRSF1_HepG2	TMEM185A	2	X:148692970-148693146	1:3	0.69697	0.763158	0.903846	0.911765				-0.177742	0.177742	0.00342908	0.031845
SRSF1_HepG2	UBE2F	22	2:238991889-238991995	21:23	0.74	0.732143	0.948718	0.878788				-0.177681	0.177681	0.00160929	0.0176313
SRSF1_HepG2	SCLY	8	2:238991889-238991995	7:9	0.74	0.732143	0.948718	0.878788				-0.177681	0.177681	0.00160929	0.0176313
SRSF1_HepG2	NDUFS1	4	2:207017143-207017234	3:5	0.792763	0.846395	0.993651	1				-0.177246	0.177246	0	0
SRSF1_HepG2	MCPH1	8	8:6301914-6303068	7:9	0.833333	0.8125	1	1				-0.177083	0.177083	0.000391174	0.00568495
SRSF1_HepG2	PHLDB3	15	19:43982199-43982284	14:16	0.909091	0.736842	1	1				-0.177033	0.177033	6.00629e-05	0.00117667
SRSF1_HepG2	QPRT	2	16:29705985-29706520	1:3	0.756098	0.77707	0.941379	0.945312				-0.176762	0.176762	5.47118e-13	5.37017e-11
SRSF1_HepG2	LGALS8	12	1:236706215-236706340	11:13	0.442308	0.479675	0.261649	0.307317				0.176508	0.176508	1.02021e-05	0.000254588
SRSF1_HepG2	CCDC76	5	1:100605738-100605807	4:6	1	1	0.882353	0.764706				0.176471	0.176471	0.000147555	0.00249929
SRSF1_HepG2	STOX1	4	10:70644016-70646374	3:5	1	0.647059	1	1				-0.176471	0.176471	0.00129897	0.0149827
SRSF1_HepG2	DDC	4	7:50607613-50607726	3:5	0.78	0.660714	0.595745	0.492063				0.176453	0.176453	0.000359843	0.00531025
SRSF1_HepG2	SNX7	3	1:99128253-99128372	1:4	0.375	0.32	0.149254	0.193548				0.176099	0.176099	0.00198679	0.0208826
SRSF1_HepG2	CALU	5	7:128394583-128394776	4:6	0.322422	0.318386	0.157895	0.130973				0.17597	0.17597	0	0
SRSF1_HepG2	CCHCR1	2	6:31125162-31125566	1:3	0.05	0.0789474	0.27027	0.210526				-0.175925	0.175925	0.0019903	0.0208965
SRSF1_HepG2	UPF3A	8	13:115064315-115064475	7:9	0.786802	0.803493	0.975124	0.966667				-0.175748	0.175748	2.88658e-15	3.65888e-13
SRSF1_HepG2	DMXL2	31	15:51757763-51757848	30:32	0.85	0.8	1	1				-0.175	0.175	0.00117663	0.0138163
SRSF1_HepG2	TMTC3	3	12:88547068-88547286	2:4	0.837838	0.75	1	0.9375				-0.174831	0.174831	0.000365989	0.00538434
SRSF1_HepG2	HELZ	17	17:65156377-65156481	16:18	0.808511	0.843137	1	1				-0.174176	0.174176	1.52226e-05	0.000356623
SRSF1_HepG2	AURKA	3	20:54963743-54963840	2:4	0.445545	0.535433	0.647887	0.680851				-0.17388	0.17388	0.00228162	0.0233531
SRSF1_HepG2	SHISA5	7	3:48514419-48514617	6:8	0.648649	0.790123	0.560714	0.530612				0.173723	0.173723	1.92118e-06	5.88341e-05
SRSF1_HepG2	HELLS	14	10:96343745-96343882	13:15	0.222222	0.125	0	0				0.173611	0.173611	0.00148504	0.016535
SRSF1_HepG2	HISPPD1	26	5:102518935-102519108	25:27	0.358209	0.247619	0.12963	0.129032				0.173583	0.173583	0.00209077	0.0217014
SRSF1_HepG2	TINAGL1	11	1:32051354-32051477	10:12	0.5	1	0.9	0.94697				-0.173485	0.173485	4.16405e-06	0.00011534
SRSF1_HepG2	HPS3	2	3:148857791-148858285	1:3	0.791667	0.821429	1	0.96				-0.173452	0.173452	0.000995959	0.0121418
SRSF1_HepG2	AP1M2	10	19:10685580-10685705	9:11	0.803493	0.811159	0.976834	0.984127				-0.173154	0.173154	0	0
SRSF1_HepG2	PDE3B	3	11:14807983-14808231	2:4	0.84375	0.810345	1	1				-0.172953	0.172953	1.85591e-07	7.29408e-06
SRSF1_HepG2	MUM1	5	19:1358587-1358699	4:6	0.424658	0.380282	0.196429	0.263158				0.172676	0.172676	0.00365443	0.0333552
SRSF1_HepG2	CREBBP	2	16:3900298-3901010	1:3	0.810811	0.844444	1	1				-0.172372	0.172372	5.48396e-05	0.00108855
SRSF1_HepG2	RFFL	10	17:33348390-33348800	9:11	0.871795	0.767857	0.983333	1				-0.171841	0.171841	4.69756e-08	2.09096e-06
SRSF1_HepG2	ASGR1	3	17:7080529-7080645	2:4	0.795574	0.791632	0.963557	0.967257				-0.171803	0.171803	0	0
SRSF1_HepG2	TMCO3	11	13:114201615-114201694	10:12	0.914286	0.944444	0.807407	0.707865				0.171729	0.171729	2.42371e-05	0.000536919
SRSF1_HepG2	APEX2	3	X:55028684-55028864	2:4	0.756757	0.85	0.95	1				-0.171622	0.171622	0.000156286	0.00261708
SRSF1_HepG2	U2AF1	4	21:44520563-44520629	3:5	0.798561	0.758437	0.6025	0.611307				0.171595	0.171595	1.15241e-13	1.2254e-11
SRSF1_HepG2	RAPGEF1	5	9:134525516-134525629	4:6	0.440678	0.380282	0.597701	0.566265				-0.171503	0.171503	0.00492465	0.0416333
SRSF1_HepG2	WDTC1	14	1:27630112-27630286	13:15	0.857143	0.8	1	1				-0.171429	0.171429	0.000436003	0.00623147
SRSF1_HepG2	CUL9	26	6:43174059-43174248	25:27	0.8	0.857143	1	1				-0.171429	0.171429	0.00121531	0.0141491
SRSF1_HepG2	CD40	2	20:44750459-44750537	1:3	1	1	0.882353	0.775				0.171324	0.171324	0.000735882	0.00954254
SRSF1_HepG2	SLC3A2	4	11:62644256-62644351	3:5	0.163265	0.184932	0.370861	0.318841				-0.170752	0.170752	4.28232e-06	0.000117839
SRSF1_HepG2	ALAS1	2	3:52232688-52232864	1:3	0.0128205	0.0171674	0.153846	0.217391				-0.170625	0.170625	5.90556e-09	3.2763e-07
SRSF1_HepG2	ITGAE	28	17:3626582-3626677	27:29	0.0451977	0.058296	0.22973	0.214286				-0.170261	0.170261	2.43585e-08	1.17141e-06
SRSF1_HepG2	ZFAND6	3	15:80390758-80390920	2:5	0.536	0.649351	0.377551	0.467532				0.170134	0.170134	0.000430571	0.00616389
SRSF1_HepG2	CHRNB1	10	17:7351898-7352107	9:11	0.833333	0.723077	0.896104	1				-0.169847	0.169847	0.000603579	0.00803373
SRSF1_HepG2	FAM96A	3	15:64373301-64373350	2:4	0.903226	0.895582	0.705085	0.754717				0.169503	0.169503	2.73141e-10	1.88734e-08
SRSF1_HepG2	SCN9A	27	2:167060465-167060735	26:28	0.666667	0.80303	0.910714	0.897436				-0.169227	0.169227	0.00212545	0.0219897
SRSF1_HepG2	C1orf57	2	1:233091303-233091465	1:3	0.657143	0.72973	0.901235	0.823529				-0.168946	0.168946	3.18384e-05	0.000683168
SRSF1_HepG2	HSCB	4	22:29141852-29141996	3:5	0.658824	0.726415	0.765625	0.957447				-0.168917	0.168917	0.00118056	0.0138497
SRSF1_HepG2	CCNYL1	7	2:208605379-208605430	6:8	0.945701	0.936567	0.784615	0.76				0.168827	0.168827	1.50849e-07	6.06566e-06
SRSF1_HepG2	TMX2	3	11:57505308-57505498	2:4	0.706231	0.774752	0.917323	0.900901				-0.16862	0.16862	1.63203e-14	1.87048e-12
SRSF1_HepG2	CA5A	3	16:87938392-87938510	2:4	0.550459	0.508065	0.393701	0.328767				0.168028	0.168028	0.000447948	0.00636033
SRSF1_HepG2	TRO	3	X:54949011-54950201	2:4	0.833333	0.830986	1	1				-0.16784	0.16784	1.94704e-06	5.9531e-05
SRSF1_HepG2	SEC16B	24	1:177929477-177929538	23:25	0.8125	0.851852	1	1				-0.167824	0.167824	0.00358563	0.0329155
SRSF1_HepG2	FBXO22	2	15:76196832-76196970	1:3	0.666667	0.697368	0.821429	0.877193				-0.167293	0.167293	0.000149415	0.002523
SRSF1_HepG2	COL27A1	6	9:116956684-116956737	5:7	0.704082	0.767442	0.588235	0.549296				0.166996	0.166996	7.18577e-05	0.00137536
SRSF1_HepG2	ZNF192	3	6:28112109-28112202	1:4	0.212121	0.16	0	0.0384615				0.16683	0.16683	0.000518294	0.00715223
SRSF1_HepG2	RPUSD1	4	16:837077-837179	3:5	1	0.666667	1	1				-0.166667	0.166667	0.00568865	0.0460969
SRSF1_HepG2	TSPAN4	5	11:850288-850367	4:7	1	1	0.8	0.866667				0.166667	0.166667	0.00244196	0.0245607
SRSF1_HepG2	C9orf46	3	9:5431897-5431983	2:4	0.963636	1	0.818182	0.8125				0.166477	0.166477	7.92733e-05	0.00149487
SRSF1_HepG2	GAPVD1	16	9:128097451-128097531	15:17	0.326087	0.176471	0.0638298	0.107143				0.165792	0.165792	0.00252201	0.0251937
SRSF1_HepG2	ARHGEF12	12	11:120300421-120300540	11:13	0.759259	0.75	0.901408	0.939394				-0.165772	0.165772	1.14039e-05	0.000282733
SRSF1_HepG2	SLC44A4	19	6:31832787-31832857	18:20	0.952381	0.927273	0.678571	0.869565				0.165759	0.165759	0.00313178	0.0297776
SRSF1_HepG2	SCMH1	6	1:41625397-41625605	5:7	0.816327	0.852459	1	1				-0.165607	0.165607	3.5207e-05	0.000744598
SRSF1_HepG2	MTR	21	1:237024425-237024577	20:22	0.846154	0.764706	0.94186	1				-0.1655	0.1655	5.23593e-05	0.00104719
SRSF1_HepG2	CENPA	11	2:27015624-27015701	10:12	0.676471	0.721519	0.895522	0.833333				-0.165433	0.165433	0.00147399	0.0164695
SRSF1_HepG2	RBM6	6	3:50004631-50006181	5:7	0.685714	0.753425	0.869919	0.9				-0.16539	0.16539	0.000149267	0.002523
SRSF1_HepG2	AC093726.6	3	7:154735737-154736330	2:4	0.869565	0.8	1	1				-0.165217	0.165217	0.00294981	0.0283681
SRSF1_HepG2	NOL8	6	9:95082225-95082661	5:7	0.0895522	0.0609756	0.304348	0.176471				-0.165145	0.165145	0.00479138	0.0407768
SRSF1_HepG2	XPO6	2	16:28220308-28220443	1:3	0.214286	0.196429	0.0588235	0.0222222				0.164834	0.164834	0.000666594	0.00875077
SRSF1_HepG2	HIPK3	15	11:33369712-33369774	14:16	0.0681818	0.0615385	0.209302	0.25				-0.164791	0.164791	0.00126214	0.0146143
SRSF1_HepG2	TNRC6A	9	16:24804794-24804970	8:10	0.287356	0.303797	0.125	0.137255				0.164449	0.164449	0.00115377	0.013598
SRSF1_HepG2	NEDD4L	7	18:55895062-55895139	6:8	0.25	0.137931	0.0227273	0.0363636				0.16442	0.16442	0.00114397	0.0135325
SRSF1_HepG2	PNKD	8	2:219206257-219206349	7:9	0.810811	0.861111	1	1				-0.164039	0.164039	2.11945e-06	6.41871e-05
SRSF1_HepG2	NMT2	11	10:15172141-15172311	10:12	0.76087	0.793103	0.941176	0.94				-0.163602	0.163602	0.000413974	0.00597546
SRSF1_HepG2	PET112L	12	4:152593761-152594048	11:13	0.831933	0.807018	0.965812	1				-0.163431	0.163431	5.52206e-10	3.65717e-08
SRSF1_HepG2	ECT2	5	3:172473273-172473365	4:6	0.173228	0.246479	0.0930233	0				0.163342	0.163342	0.00321107	0.0302758
SRSF1_HepG2	C1RL	4	12:7252497-7252622	3:5	0.941176	0.72093	0.988636	1				-0.163265	0.163265	1.43383e-06	4.52863e-05
SRSF1_HepG2	MUM1	8	19:1364508-1364578	7:9	0.984848	1	0.893617	0.764706				0.163263	0.163263	7.59931e-06	0.000196025
SRSF1_HepG2	RNF14	6	5:141354369-141354520	5:7	0.924051	0.897959	0.8	0.695652				0.163179	0.163179	0.00271818	0.0266117
SRSF1_HepG2	NTAN1	2	16:15141854-15141956	1:3	0.761194	0.7	0.828358	0.958904				-0.163034	0.163034	0.000140958	0.00240673
SRSF1_HepG2	CACNA2D4	30	12:1910740-1910810	29:31	0.327586	0.407407	0.227273	0.182432				0.162644	0.162644	0.00172284	0.0186617
SRSF1_HepG2	HERC1	66	15:63926932-63927087	65:67	0.842105	0.833333	1	1				-0.162281	0.162281	0.000791888	0.0101112
SRSF1_HepG2	COL4A5	31	X:107849972-107850122	30:32	0.820513	0.833333	1	0.978261				-0.162207	0.162207	3.47673e-06	9.90246e-05
SRSF1_HepG2	C12orf73	3	12:104347192-104347312	2:4	0.287234	0.373737	0.196262	0.141026				0.161842	0.161842	0.000279082	0.00429736
SRSF1_HepG2	UNC13B	14	9:35375124-35375198	13:15	0.8	0.797101	0.982143	0.9375				-0.161271	0.161271	0.000388412	0.00566201
SRSF1_HepG2	CMC1	2	3:28304782-28304871	1:3	0.926829	0.873563	0.730159	0.747748				0.161243	0.161243	4.27699e-05	0.000875525
SRSF1_HepG2	THUMPD2	4	2:39995564-39996331	3:5	0.882353	0.795918	1	1				-0.160864	0.160864	3.22379e-06	9.32075e-05
SRSF1_HepG2	RHOQ	2	2:46770893-46770951	1:3	0.967742	1	0.8	0.846154				0.160794	0.160794	0.00339401	0.0316576
SRSF1_HepG2	CLDN12	4	7:89984400-89984544	3:5	1	0.979592	0.952381	0.705882				0.160664	0.160664	0.000205508	0.00329156
SRSF1_HepG2	NRM	4	6:30657053-30657229	3:5	0.96	0.953488	0.792453	0.8				0.160518	0.160518	0.00491326	0.0415553
SRSF1_HepG2	IRF3	6	19:50164707-50165585	5:7	0.833333	0.846154	1	1				-0.160256	0.160256	3.51385e-08	1.60897e-06
SRSF1_HepG2	GINS1	2	20:25394426-25394490	1:3	0.865169	0.814433	1	1				-0.160199	0.160199	1.73964e-05	0.000398287
SRSF1_HepG2	SLC46A1	3	17:26729256-26729339	2:4	0.9375	0.976744	0.8	0.794118				0.160063	0.160063	0.000237783	0.0037274
SRSF1_HepG2	ABCD4	13	14:74756730-74756821	12:14	0.777778	0.638298	0.867347	0.868852				-0.160062	0.160062	0.00236393	0.0239394
SRSF1_HepG2	LMBR1	8	7:156572349-156572426	7:9	0.169811	0.212766	0	0.0625				0.160039	0.160039	2.4326e-05	0.000537643
SRSF1_HepG2	ABCC6	20	16:16271309-16271483	19:21	0.842975	0.837037	1	1				-0.159994	0.159994	2.56958e-11	2.10308e-09
SRSF1_HepG2	MMAB	8	12:109999048-109999134	7:9	0.12963	0.208955	0.363636	0.294643				-0.159847	0.159847	0.0012996	0.0149827
SRSF1_HepG2	THAP6	2	4:76440643-76440742	1:3	0.810811	0.869565	1	1				-0.159812	0.159812	0.000206154	0.0032964
SRSF1_HepG2	ITIH1	20	3:52824765-52824937	19:21	0.789474	0.78125	0.935484	0.954751				-0.159756	0.159756	6.83015e-07	2.3987e-05
SRSF1_HepG2	PRIM1	2	12:57144822-57144979	1:3	0.780822	0.845238	0.987179	0.957746				-0.159433	0.159433	4.45529e-06	0.000121995
SRSF1_HepG2	C21orf59	6	21:33974582-33974677	5:7	0.821053	0.831967	0.993865	0.977778				-0.159311	0.159311	1.14353e-14	1.34277e-12
SRSF1_HepG2	DUS4L	5	7:107214149-107214328	4:6	1	1	0.942857	0.73913				0.159006	0.159006	0.000466143	0.00655546
SRSF1_HepG2	MLXIPL	11	7:73010969-73011119	10:12	0.843137	0.8	0.961039	1				-0.158951	0.158951	8.45101e-06	0.000215383
SRSF1_HepG2	CD163L1	18	12:7519832-7519927	17:19	0.829268	0.852941	1	1				-0.158895	0.158895	1.47083e-05	0.000347676
SRSF1_HepG2	PPOX	5	1:161137785-161137917	4:6	0.8	0.882353	1	1				-0.158824	0.158824	0.00287351	0.0278194
SRSF1_HepG2	TUFT1	6	1:151537001-151537090	5:7	0.764706	0.880952	0.962963	1				-0.158652	0.158652	0.0026519	0.0261097
SRSF1_HepG2	GEMIN7	2	19:45583165-45583287	1:3	0.608247	0.677419	0.572581	0.395833				0.158626	0.158626	0.000857902	0.0107674
SRSF1_HepG2	NUPL1	3	13:25883385-25883420	2:4	0.980392	0.983051	0.797101	0.85				0.158171	0.158171	3.22806e-05	0.000691108
SRSF1_HepG2	ACIN1	4	14:23559191-23559310	3:5	0.15	0.145329	0.291139	0.32				-0.157905	0.157905	3.36791e-07	1.25168e-05
SRSF1_HepG2	FBRSL1	15	12:133158327-133158410	14:16	0.923077	1	0.783784	0.823529				0.157882	0.157882	0.00430756	0.0378023
SRSF1_HepG2	BAG4	2	8:38050206-38050313	1:3	0.783784	0.807692	0.965517	0.941176				-0.157609	0.157609	0.00595682	0.0476767
SRSF1_HepG2	XRN2	14	20:21314716-21314823	13:15	0.809628	0.876494	1	1				-0.156939	0.156939	0	0
SRSF1_HepG2	RAB9A	2	X:13721933-13722021	1:3	1	0.942857	0.84375	0.785714				0.156696	0.156696	0.00227682	0.0233164
SRSF1_HepG2	NICN1	3	3:49463316-49463429	2:4	0.65625	0.813559	0.886364	0.896552				-0.156553	0.156553	0.00439546	0.0382324
SRSF1_HepG2	C14orf104	2	14:50094730-50094873	1:3	0.779817	0.731481	0.602564	0.596491				0.156121	0.156121	0.00164793	0.0179929
SRSF1_HepG2	SLC36A4	4	11:92917596-92917686	3:5	0.894737	0.758621	1	0.965517				-0.15608	0.15608	0.000550643	0.00747999
SRSF1_HepG2	B4GALNT4	4	11:372852-372947	3:5	0.878788	0.8	0.990291	1				-0.155752	0.155752	1.45444e-07	5.90758e-06
SRSF1_HepG2	KIAA0391	3	14:35592158-35593437	2:4	0.902439	0.916667	0.746269	0.761905				0.155466	0.155466	0.00114997	0.0135616
SRSF1_HepG2	RIF1	32	2:152324988-152325065	31:33	0.136691	0.145985	0.284091	0.309091				-0.155253	0.155253	0.000201535	0.00323335
SRSF1_HepG2	SIDT2	13	11:117058608-117058670	12:14	0.217391	0.135135	0.0178571	0.0243902				0.15514	0.15514	5.48825e-05	0.00108855
SRSF1_HepG2	GKAP1	7	9:86407866-86407932	6:8	0	0.0444444	0.21875	0.135135				-0.15472	0.15472	0.00530166	0.0438332
SRSF1_HepG2	RBM5	10	3:50142982-50143142	9:11	0.778761	0.788235	0.983871	0.892473				-0.154674	0.154674	5.05429e-07	1.82526e-05
SRSF1_HepG2	RBM6	35	3:50142982-50143142	34:36	0.778761	0.788235	0.983871	0.892473				-0.154674	0.154674	5.05429e-07	1.82526e-05
SRSF1_HepG2	RCC1	7	1:28857035-28857127	6:8	0.0681818	0.0614525	0.225941	0.212766				-0.154537	0.154537	1.71996e-09	1.03198e-07
SRSF1_HepG2	PICALM	19	11:85689113-85689136	18:20	0.511628	0.616915	0.690821	0.746575				-0.154427	0.154427	1.31537e-05	0.000319494
SRSF1_HepG2	SLC25A32	3	8:104417004-104417089	2:4	1	0.967213	0.842105	0.816327				0.154391	0.154391	5.41325e-05	0.00107702
SRSF1_HepG2	CLASP1	22	2:122203025-122203072	21:24	0.0348837	0.0357143	0.173913	0.205128				-0.154222	0.154222	4.82826e-05	0.000973792
SRSF1_HepG2	POLR1B	2	2:113303408-113303499	1:3	0.025641	0	0.166667	0.166667				-0.153846	0.153846	0.000817867	0.0103669
SRSF1_HepG2	FAM98C	7	19:38897550-38897717	6:8	0.875	0.818182	1	1				-0.153409	0.153409	0.000112286	0.00199365
SRSF1_HepG2	SMARCAL1	6	2:217285022-217285259	5:7	0.852941	0.818182	0.977778	1				-0.153327	0.153327	2.48751e-05	0.000547252
SRSF1_HepG2	SMG7	19	1:183516238-183516387	18:20	0.0441176	0.0123457	0.120879	0.241935				-0.153176	0.153176	1.22911e-05	0.000300449
SRSF1_HepG2	ATPBD4	8	15:35674023-35674117	7:9	0.88	0.814815	1	1				-0.152593	0.152593	0.00375631	0.0340534
SRSF1_HepG2	EML2	22	19:46119719-46119816	21:23	0.8125	0.882353	1	1				-0.152574	0.152574	0.000717555	0.00933651
SRSF1_HepG2	ABCC6	25	16:16256850-16257049	24:26	0.71831	0.67	0.592593	0.490909				0.152404	0.152404	0.00554866	0.0452632
SRSF1_HepG2	CPNE1	12	20:34220085-34220156	11:13	0.802402	0.798713	0.951724	0.95186				-0.151235	0.151235	0	0
SRSF1_HepG2	NFS1	27	20:34220085-34220156	26:28	0.802402	0.798713	0.951724	0.95186				-0.151235	0.151235	0	0
SRSF1_HepG2	TTC31	3	2:74717152-74717254	2:4	0.730769	0.795455	0.942308	0.886364				-0.151224	0.151224	0.00403	0.036044
SRSF1_HepG2	POLR2D	3	2:128608164-128608259	2:4	0.774566	0.745455	0.903448	0.918605				-0.151016	0.151016	9.98577e-07	3.32396e-05
SRSF1_HepG2	SUN2	9	22:39146903-39147040	8:10	0.851064	0.783784	0.992857	0.944				-0.151005	0.151005	1.19153e-06	3.85885e-05
SRSF1_HepG2	MAGOH	3	1:53699214-53699324	2:4	0.667436	0.680525	0.838284	0.811538				-0.15093	0.15093	6.78563e-11	5.13649e-09
SRSF1_HepG2	VIPAR	20	14:77894713-77894817	19:21	0.90411	0.794521	1	1				-0.150685	0.150685	2.9011e-06	8.55577e-05
SRSF1_HepG2	IMPA1	8	8:82583174-82583282	7:9	0.931034	0.968085	0.789474	0.808511				0.150568	0.150568	7.56351e-05	0.00143759
SRSF1_HepG2	STARD3NL	2	7:38218692-38218747	1:3	0.290698	0.266667	0.110092	0.146341				0.150466	0.150466	0.00044682	0.00635846
SRSF1_HepG2	HNRPDL	8	4:83346716-83346820	7:9	0.126214	0.0967742	0.25	0.273885				-0.150449	0.150449	1.06581e-14	1.26706e-12
SRSF1_HepG2	TIAL1	2	10:121352964-121353025	1:3	0.2	0.299145	0.0857143	0.112676				0.150377	0.150377	9.04185e-05	0.00167047
SRSF1_HepG2	RP11-428C6.1	35	5:73205237-73205722	34:36	0.862069	0.837838	1	1				-0.150047	0.150047	9.03924e-05	0.00167047
SRSF1_HepG2	PQLC2	3	1:19644094-19644335	2:4	0.8	0.9	1	1				-0.15	0.15	0.000310236	0.004694
SRSF1_HepG2	ZIM2	3	19:57337756-57337831	2:4	0.471111	0.51145	0.336323	0.346667				0.149786	0.149786	1.46443e-05	0.000347326
SRSF1_HepG2	GGCT	2	7:30540152-30540297	1:4	0.647059	0.769231	0.88	0.835821				-0.149766	0.149766	0.000157911	0.00264197
SRSF1_HepG2	BRD8	11	5:137502207-137502416	10:12	0.939597	0.974359	0.781609	0.833333				0.149507	0.149507	2.27673e-06	6.86245e-05
SRSF1_HepG2	EPB41L5	25	2:120925453-120925583	24:26	0.8125	0.840909	0.952381	1				-0.149486	0.149486	0.00509379	0.0426807
SRSF1_HepG2	ABI2	12	2:204276008-204276094	11:13	0.683099	0.690909	0.525547	0.55				0.14923	0.14923	0.0004115	0.00594423
SRSF1_HepG2	SEC11A	2	15:85257962-85258097	1:3	0.202602	0.176647	0.0351906	0.0457317				0.149163	0.149163	3.51941e-14	3.87135e-12
SRSF1_HepG2	FMO5	7	1:146672734-146673086	6:8	0.815126	0.862595	0.992063	0.983494				-0.148918	0.148918	0	0
SRSF1_HepG2	PSMG4	5	6:3264443-3264559	4:6	0.205882	0.1875	0.0493827	0.0465116				0.148744	0.148744	0.000179455	0.00293906
SRSF1_HepG2	YAP1	7	11:102080248-102080295	6:8	0.580247	0.489627	0.39759	0.375				0.148642	0.148642	3.84176e-05	0.000800995
SRSF1_HepG2	ATG9A	2	2:220093156-220093207	1:3	0.765957	0.806452	0.688525	0.586777				0.148554	0.148554	0.0055503	0.0452632
SRSF1_HepG2	NAE1	2	16:66861883-66861980	1:3	0.032	0.0873016	0.222222	0.193548				-0.148235	0.148235	1.72367e-06	5.347e-05
SRSF1_HepG2	PMS1	2	2:190650072-190650197	1:3	0.0882353	0.272727	0.03125	0.0333333				0.14819	0.14819	0.00142738	0.016099
SRSF1_HepG2	RECQL4	19	8:145737294-145737450	18:20	0.944444	0.761905	1	1				-0.146825	0.146825	0.00253604	0.0252812
SRSF1_HepG2	GIPC1	4	19:14593501-14593818	3:5	0.679245	0.643939	0.75	0.866667				-0.146741	0.146741	0.00461304	0.0396658
SRSF1_HepG2	DAGLB	9	7:6474393-6474651	8:10	0.821429	0.886364	1	1				-0.146104	0.146104	0.00538299	0.0443142
SRSF1_HepG2	ASPH	11	8:62559309-62559437	10:12	0.668203	0.668241	0.825666	0.802985				-0.146104	0.146104	6.75016e-14	7.29932e-12
SRSF1_HepG2	AKT2	11	19:40742164-40742292	10:12	0.850746	0.844086	0.991304	0.995074				-0.145773	0.145773	1.11022e-16	1.60982e-14
SRSF1_HepG2	AGPAT1	3	6:32143591-32143916	2:5	0.218182	0.355932	0.440559	0.423913				-0.145179	0.145179	0.000947241	0.0116668
SRSF1_HepG2	DEPDC1B	11	5:59894902-59895087	10:12	0.755906	0.75817	0.877551	0.926829				-0.145152	0.145152	4.50711e-05	0.000916623
SRSF1_HepG2	HACL1	6	3:15628032-15628109	5:7	0.984127	0.988095	0.8	0.882353				0.144935	0.144935	0.000149482	0.002523
SRSF1_HepG2	NEDD4L	18	18:56002710-56002769	17:19	0.205128	0.307692	0.0787402	0.144231				0.144925	0.144925	0.0011252	0.0133766
SRSF1_HepG2	C5orf13	8	5:111091467-111091527	7:9	0.979839	0.986577	0.836957	0.840361				0.144549	0.144549	0	0
SRSF1_HepG2	ADH6	7	4:100128603-100128738	6:8	0.935691	0.959064	0.809524	0.796296				0.144468	0.144468	1.57652e-14	1.81774e-12
SRSF1_HepG2	ACIN1	12	14:23536523-23537880	11:13	0.121718	0.19869	0.34	0.268456				-0.144024	0.144024	1.33841e-08	6.79499e-07
SRSF1_HepG2	VPS11	5	11:118942306-118942553	4:6	0.861111	0.852941	1	1				-0.142974	0.142974	3.01439e-05	0.000650455
SRSF1_HepG2	CKLF	2	16:66592093-66592251	1:3	0.575949	0.446154	0.670498	0.637255				-0.142825	0.142825	4.05034e-05	0.000835383
SRSF1_HepG2	MLX	3	17:40720488-40720577	2:4	0.909774	0.9	0.761468	0.763158				0.142574	0.142574	2.07518e-06	6.29462e-05
SRSF1_HepG2	C8B	2	1:57429445-57429666	1:3	0.111111	0.173913	0	0				0.142512	0.142512	3.19251e-07	1.19812e-05
SRSF1_HepG2	SMPDL3A	2	6:123116822-123117035	1:3	0.82	0.803279	0.942029	0.965517				-0.142134	0.142134	0.000386617	0.00564014
SRSF1_HepG2	MRPS10	3	6:42181858-42181956	2:4	0.810945	0.810945	0.916084	0.989011				-0.141602	0.141602	1.46013e-07	5.90844e-06
SRSF1_HepG2	R3HDM2	8	12:57691111-57691170	7:9	0.795455	0.76	0.877193	0.960784				-0.141261	0.141261	0.00330126	0.0310192
SRSF1_HepG2	SOS1	24	2:39216411-39216455	23:25	0.77907	0.845238	0.666667	0.675325				0.141158	0.141158	0.00258263	0.0256255
SRSF1_HepG2	LCAT	5	16:67976266-67976490	4:6	0.828571	0.857143	0.986667	0.981308				-0.14113	0.14113	5.01005e-08	2.2095e-06
SRSF1_HepG2	GCC2	13	2:109099518-109099622	12:14	0.825	0.869565	0.976744	1				-0.141089	0.141089	4.1407e-07	1.51535e-05
SRSF1_HepG2	CCDC84	9	11:118883942-118883972	8:10	0.96875	0.983871	0.766667	0.904762				0.140596	0.140596	0.000872051	0.0109021
SRSF1_HepG2	ATP7B	7	13:52535973-52536049	6:8	0.941176	0.777778	1	1				-0.140523	0.140523	3.19713e-08	1.48888e-06
SRSF1_HepG2	GBA2	5	9:35741669-35741905	4:6	0.813559	0.78481	0.94186	0.9375				-0.140496	0.140496	0.000171876	0.00283351
SRSF1_HepG2	SLC5A9	8	1:48697618-48697823	7:9	0.821429	0.794118	0.978723	0.917808				-0.140493	0.140493	0.00189758	0.0201664
SRSF1_HepG2	ZNHIT3	2	17:34842779-34842810	1:3	0.88755	0.885397	0.77732	0.714674				0.140477	0.140477	2.10942e-15	2.69162e-13
SRSF1_HepG2	C3orf37	5	3:129009522-129009647	4:6	0.724409	0.85	0.930233	0.925				-0.140412	0.140412	1.37937e-05	0.000331114
SRSF1_HepG2	ARHGAP1	7	11:46703601-46703732	5:8	0.826667	0.83	0.936842	1				-0.140088	0.140088	1.34132e-05	0.000324288
SRSF1_HepG2	MAP3K3	16	17:61769602-61769779	15:17	0.75	0.925	0.954545	1				-0.139773	0.139773	0.005717	0.0462678
SRSF1_HepG2	ENTPD5	14	14:74439587-74439727	13:15	1	1	0.866667	0.853933				0.1397	0.1397	1.31561e-13	1.39121e-11
SRSF1_HepG2	RPAIN	7	17:5331391-5331531	6:9	0.716981	0.746479	0.787611	0.955224				-0.139687	0.139687	0.000926132	0.0114436
SRSF1_HepG2	RHBG	5	1:156347781-156347931	4:6	0.911765	0.956044	0.761905	0.827586				0.139159	0.139159	0.000436268	0.00623147
SRSF1_HepG2	C4orf8	8	4:2656785-2656856	7:9	0.166667	0.111111	0	0				0.138889	0.138889	0.00493421	0.0416957
SRSF1_HepG2	PI4KB	7	1:151282687-151282731	6:8	0.168831	0.204545	0.0727273	0.0232558				0.138697	0.138697	0.000432154	0.00618194
SRSF1_HepG2	FIP1L1	11	4:54280782-54280889	10:12	0.56213	0.628272	0.480769	0.432432				0.1386	0.1386	0.00258638	0.0256361
SRSF1_HepG2	AP001011.3	20	18:2722517-2722661	19:21	0.78	0.854545	0.945946	0.965517				-0.138459	0.138459	0.00297759	0.0285813
SRSF1_HepG2	SFRS4	8	1:29486376-29486603	7:9	0.125	0.192308	0.0405405	0				0.138384	0.138384	7.04015e-07	2.45444e-05
SRSF1_HepG2	LUC7L	5	16:258600-259774	4:6	0.162393	0.0794702	0.207547	0.310345				-0.138014	0.138014	0.000120875	0.00211477
SRSF1_HepG2	CRELD1	5	3:9979699-9979790	4:6	0.906977	0.80597	1	0.988889				-0.137971	0.137971	2.82331e-07	1.07646e-05
SRSF1_HepG2	CNOT7	7	8:17089936-17090046	6:8	0.869347	0.852018	0.99705	1				-0.137843	0.137843	0	0
SRSF1_HepG2	MAVS	4	20:3841979-3842151	3:5	0.824176	0.801653	0.918367	0.983051				-0.137795	0.137795	8.35993e-05	0.00156259
SRSF1_HepG2	CNPY3	4	6:42903150-42903211	3:5	0.256	0.273333	0.115702	0.13834				0.137645	0.137645	1.71503e-06	5.32883e-05
SRSF1_HepG2	POLR1D	5	13:28224179-28224378	4:6	0.0242424	0.0402299	0.205882	0.133333				-0.137372	0.137372	5.95108e-09	3.29201e-07
SRSF1_HepG2	NPM1	11	5:170833401-170833731	10:12	0.322744	0.336357	0.185367	0.199476				0.137129	0.137129	0	0
SRSF1_HepG2	ENOPH1	3	4:83372196-83372398	2:4	0.883333	0.816456	0.992481	0.981481				-0.137087	0.137087	1.17343e-09	7.26845e-08
SRSF1_HepG2	CRAMP1L	13	16:1712762-1712836	12:14	0.8	0.925926	1	1				-0.137037	0.137037	0.00482034	0.0409647
SRSF1_HepG2	SNX10	4	7:26396627-26396747	3:5	0.0333333	0.0447761	0.147727	0.204082				-0.13685	0.13685	0.000247506	0.00386086
SRSF1_HepG2	LIX1L	4	1:145497393-145497488	3:5	0.838235	0.811594	0.943396	0.979167				-0.136367	0.136367	0.000348885	0.00519662
SRSF1_HepG2	AC090699.1	2	17:74555027-74555125	1:3	0.58284	0.612903	0.458716	0.464501				0.136264	0.136264	1.39486e-09	8.52961e-08
SRSF1_HepG2	EIF1AY	4	Y:22746360-22746410	3:5	0.836576	0.835821	0.966912	0.977876				-0.136196	0.136196	1.15463e-14	1.34754e-12
SRSF1_HepG2	ITGB3BP	4	1:63955754-63955889	3:5	0.824742	0.803419	0.950495	0.95				-0.136167	0.136167	6.61049e-05	0.00127932
SRSF1_HepG2	PIGA	2	X:15349338-15350114	1:3	0.852941	0.875	1	1				-0.136029	0.136029	0.00523667	0.0434459
SRSF1_HepG2	RFC5	2	12:118455495-118455858	1:3	0.0151515	0.00961538	0.0909091	0.205128				-0.135635	0.135635	2.63136e-05	0.000575592
SRSF1_HepG2	CWF19L1	12	10:101996607-101996726	11:13	0.846154	0.8	0.971429	0.945946				-0.13561	0.13561	0.000417781	0.00602134
SRSF1_HepG2	RASA4B	2	7:102210282-102210371	1:3	0.808219	0.904762	0.983871	1				-0.135445	0.135445	7.86361e-06	0.000201755
SRSF1_HepG2	TMPO	4	12:98926601-98929412	3:5	0.310811	0.254777	0.15	0.144737				0.135426	0.135426	0.00048421	0.00675493
SRSF1_HepG2	RNF123	9	3:49736188-49736255	8:10	0.816327	0.913043	1	1				-0.135315	0.135315	1.09029e-06	3.56111e-05
SRSF1_HepG2	CD164	6	6:109691614-109691670	5:7	0.939042	0.953586	0.814318	0.807692				0.135309	0.135309	0	0
SRSF1_HepG2	SLC6A6	10	3:14509596-14509720	9:11	0.809524	0.92	1	1				-0.135238	0.135238	0.0015956	0.0175333
SRSF1_HepG2	TRRAP	32	7:98543370-98543423	31:34	0.172414	0.142857	0	0.0454545				0.134908	0.134908	0.0046143	0.0396658
SRSF1_HepG2	ARAP1	15	11:72415197-72415379	14:17	0.978723	0.982456	0.862069	0.829787				0.134662	0.134662	0.000533238	0.00732676
SRSF1_HepG2	DNAJC8	6	1:28536483-28536577	5:7	0.853333	0.848057	0.990847	0.979522				-0.134489	0.134489	0	0
SRSF1_HepG2	SEPT11	6	4:77916934-77917091	1:7	0.133333	0.135135	0	0				0.134234	0.134234	0.00182173	0.0194684
SRSF1_HepG2	PARP16	3	15:65558900-65559106	2:4	0.84	0.891892	1	1				-0.134054	0.134054	0.00153882	0.017015
SRSF1_HepG2	SPAG5	8	17:26912552-26912671	7:9	0.911504	0.821138	1	1				-0.133679	0.133679	2.48896e-06	7.42035e-05
SRSF1_HepG2	WHSC1	13	4:1940178-1940259	12:14	0.818182	0.843137	0.963855	0.964286				-0.133411	0.133411	5.25047e-05	0.001049
SRSF1_HepG2	RECQL5	15	17:73626699-73626772	14:16	0.9	0.833333	1	1				-0.133333	0.133333	0.000549985	0.00747636
SRSF1_HepG2	TCP11L2	12	12:106729810-106729991	11:13	0.733333	1	1	1				-0.133333	0.133333	0.000286296	0.00439431
SRSF1_HepG2	NIPBL	10	5:36984778-36986403	9:11	0.857143	0.876289	1	1				-0.133284	0.133284	2.35444e-05	0.000523391
SRSF1_HepG2	RCE1	7	11:66612971-66613033	6:8	0.9	0.947368	0.823529	0.758065				0.132887	0.132887	0.00205506	0.0214004
SRSF1_HepG2	HMGCS1	2	5:43307868-43307926	1:3	0.462051	0.524324	0.645946	0.606124				-0.132847	0.132847	0.000543627	0.00742685
SRSF1_HepG2	ODAM	7	4:71067171-71067218	6:8	0.617021	0.602787	0.751724	0.732673				-0.132294	0.132294	1.4832e-05	0.000350042
SRSF1_HepG2	TNRC6A	11	16:24807228-24807260	10:12	0.936709	0.962963	0.870968	0.764706				0.131999	0.131999	0.000144387	0.00245651
SRSF1_HepG2	MSL1	7	17:38287790-38287837	6:8	0.823529	0.859155	0.704433	0.714286				0.131983	0.131983	0.00360865	0.0330343
SRSF1_HepG2	PKN3	15	9:131477648-131477739	14:16	0.935484	0.767442	1	0.964286				-0.13068	0.13068	0.00108599	0.0130646
SRSF1_HepG2	PLD1	20	3:171404475-171404588	19:21	0.12	0.180723	0.027027	0.0123457				0.130675	0.130675	3.24613e-06	9.37118e-05
SRSF1_HepG2	REPS1	20	6:139228632-139228737	19:21	0.819355	0.897143	1	0.977273				-0.130388	0.130388	3.7673e-08	1.70463e-06
SRSF1_HepG2	SDR39U1	3	14:24911304-24911466	2:4	0.723577	0.644172	0.774834	0.853659				-0.130372	0.130372	0.000188812	0.00305741
SRSF1_HepG2	FAM126A	6	7:23016312-23016427	5:7	0.929825	0.777778	0.967742	1				-0.13007	0.13007	0.00388427	0.0349201
SRSF1_HepG2	ATM	21	11:108141791-108141873	20:22	0.886364	0.853659	1	1				-0.129989	0.129989	0.00132713	0.0152256
SRSF1_HepG2	BBS4	17	15:73029103-73029304	16:18	0.823529	0.916667	1	1				-0.129902	0.129902	0.000145591	0.00247041
SRSF1_HepG2	ADK	7	10:76285014-76285184	6:8	0.845411	0.832753	0.971429	0.965909				-0.129587	0.129587	9.4913e-12	8.22006e-10
SRSF1_HepG2	LGR5	8	12:71955561-71955632	7:9	0.957317	0.959799	0.842105	0.816327				0.129342	0.129342	3.06648e-06	8.98813e-05
SRSF1_HepG2	C4orf8	15	4:2691233-2691431	14:16	0.976744	1	0.878788	0.84				0.128978	0.128978	0.00322431	0.0303857
SRSF1_HepG2	CPSF6	6	12:69651815-69651925	5:7	0.0150376	0.0310078	0.191011	0.112903				-0.128935	0.128935	1.14021e-06	3.69893e-05
SRSF1_HepG2	PCSK6	4	15:101971525-101971668	3:5	0.855263	0.876847	0.731392	0.742857				0.128931	0.128931	4.00656e-06	0.000111461
SRSF1_HepG2	VPS37A	3	8:17125767-17125881	2:4	0.857143	0.885246	1	1				-0.128806	0.128806	1.41468e-08	7.14432e-07
SRSF1_HepG2	ST3GAL6	8	3:98492764-98492827	7:9	0.943396	0.942029	0.824561	0.804878				0.127993	0.127993	0.00345213	0.0319815
SRSF1_HepG2	EXOSC9	9	4:122734389-122734535	8:10	0.867347	0.853659	0.989691	0.986111				-0.127398	0.127398	2.35488e-07	9.14246e-06
SRSF1_HepG2	KLHL23	7	2:170591523-170592737	6:8	0.820513	0.925	1	1				-0.127244	0.127244	0.000134332	0.00231281
SRSF1_HepG2	MRPL9	5	1:151733927-151734028	4:6	0.774038	0.798479	0.917051	0.909722				-0.127128	0.127128	2.21551e-07	8.61888e-06
[truncated: 798 more rows]

## Sheet: SRSF2
	gene_symbol	exon_skipped	coordonnees	exons_flanquants	psi_K562_mCherry	psi_K562_SRSF2	deltaPSI	valeur abs deltaPSI	pvalue_Fisher	pvalue_corrigee_Fisher		negative deltaPsi= activated exons
SRSF2_K562	SLC25A16	3	10:70276841-70277022	1:4	0.925926	0.137931	0.787995	0.787995	1.16168e-09	2.43493e-07		positive deltaPsi= repressed exons
SRSF2_K562	C22orf39	11	22:19386603-19386715	10:12	0.291667	1	-0.708333	0.708333	4.39334e-11	1.18688e-08
SRSF2_K562	HIRA	10	22:19386603-19386715	9:11	0.291667	1	-0.708333	0.708333	4.39334e-11	1.18688e-08
SRSF2_K562	FAM13B	19	5:137281917-137282000	18:20	1	0.371429	0.628571	0.628571	0.000239984	0.00938099
SRSF2_K562	PRSS16	8	6:27219529-27219819	7:9	0.285714	0.852941	-0.567227	0.567227	0.00027072	0.010415
SRSF2_K562	FANCD2	22	3:10106040-10106113	21:23	0.728571	0.210526	0.518045	0.518045	3.15896e-10	7.11175e-08
SRSF2_K562	IMPA1	2	8:82597998-82598198	1:3	0.103448	0.616438	-0.51299	0.51299	1.86066e-06	0.000161572
SRSF2_K562	C1orf63	6	1:25570945-25570989	5:7	0.589744	0.0955224	0.494221	0.494221	2.01105e-30	2.44483e-27
SRSF2_K562	SUOX	3	12:56393117-56393242	2:4	0.36	0.848485	-0.488485	0.488485	0.00023699	0.00929383
SRSF2_K562	SRSF2	3	17:74731854-74731957	2:4	0.216741	0.701863	-0.485122	0.485122	2.73548e-49	5.54255e-46
SRSF2_K562	SLC7A11	7	4:139106275-139106398	6:8	0.903226	0.421053	0.482173	0.482173	0.000670907	0.0208599
SRSF2_K562	DBR1	6	3:137882620-137882700	5:7	1	0.518519	0.481481	0.481481	0.000473302	0.0158948
SRSF2_K562	RPRD2	6	1:150414357-150414434	5:7	0.631579	0.153846	0.477733	0.477733	0.000540856	0.0176752
SRSF2_K562	IMMP1L	6	11:31473745-31474639	5:7	0.05	0.521739	-0.471739	0.471739	0.000851917	0.0243688
SRSF2_K562	SGSM2	12	17:2270565-2270699	11:13	0.565217	0.103448	0.461769	0.461769	0.000615484	0.0194349
SRSF2_K562	DCUN1D4	11	4:52775086-52775141	10:12	0.255814	0.711538	-0.455725	0.455725	1.21981e-05	0.000857178
SRSF2_K562	FNIP1	7	5:131046271-131046354	6:8	0.6	0.148649	0.451351	0.451351	2.94728e-05	0.0017226
SRSF2_K562	NHLRC3	4	13:39616242-39616442	3:5	0.9	0.452381	0.447619	0.447619	0.000795963	0.0235348
SRSF2_K562	GTSE1	3	22:46704047-46704104	2:4	1	0.555556	0.444444	0.444444	2.82399e-05	0.00169091
SRSF2_K562	KIF21B	28	1:200952184-200952222	27:29	0.695652	0.254902	0.44075	0.44075	0.00063077	0.0197636
SRSF2_K562	GPCPD1	5	20:5566840-5566915	4:6	0.75	0.3125	0.4375	0.4375	0.000304661	0.0114314
SRSF2_K562	RBM15	2	1:110888161-110888271	1:3	0.230769	0.666667	-0.435897	0.435897	0.000318573	0.0118437
SRSF2_K562	TARBP1	19	1:234563063-234563134	18:20	1	0.566038	0.433962	0.433962	4.98336e-06	0.000390856
SRSF2_K562	C17orf101	9	17:80352207-80352419	8:10	0.414894	0.829787	-0.414894	0.414894	3.95234e-12	1.45602e-09
SRSF2_K562	RABGAP1L	36	1:174957778-174957975	35:37	0.59375	1	-0.40625	0.40625	2.27451e-06	0.000192023
SRSF2_K562	DCAF10	6	9:37857238-37857348	5:7	0.787234	0.390805	0.396429	0.396429	1.13149e-05	0.000809148
SRSF2_K562	ACAD10	16	12:112183948-112184088	15:17	1	0.608696	0.391304	0.391304	0.00174696	0.0420551
SRSF2_K562	LPIN1	11	2:11916212-11916319	10:14	0.217949	0.60396	-0.386012	0.386012	2.02631e-07	2.32395e-05
SRSF2_K562	ATAD5	18	17:29206441-29206505	17:19	1	0.614286	0.385714	0.385714	2.96712e-05	0.0017259
SRSF2_K562	C13orf23	2	13:39608268-39608333	1:3	0.884615	0.5	0.384615	0.384615	0.00117947	0.0315139
SRSF2_K562	ENOSF1	14	18:678696-678737	13:15	0.855263	0.473118	0.382145	0.382145	1.68303e-07	1.96737e-05
SRSF2_K562	KIAA1524	5	3:108300955-108301049	4:6	1	0.62069	0.37931	0.37931	0.0013771	0.0353942
SRSF2_K562	HARS2	7	5:140075688-140075786	6:8	0.835821	0.457627	0.378194	0.378194	3.99286e-07	4.33404e-05
SRSF2_K562	MBTD1	13	17:49279383-49279438	12:14	0.928571	0.55814	0.370432	0.370432	0.0010796	0.0292963
SRSF2_K562	HNRPDL	8	4:83346716-83346820	7:9	0.0925508	0.460674	-0.368123	0.368123	3.10646e-33	5.39504e-30
SRSF2_K562	MRPS18C	3	4:84379499-84379582	2:4	0.860465	0.492647	0.367818	0.367818	1.3699e-20	1.18956e-17
SRSF2_K562	ZDHHC7	4	16:85022369-85022479	3:5	0.219178	0.585938	-0.366759	0.366759	4.28418e-07	4.60909e-05
SRSF2_K562	ZC3H7A	11	16:11862887-11862951	10:12	0.853659	0.487805	0.365854	0.365854	0.00082341	0.0238907
SRSF2_K562	SFRS18	11	6:99851705-99851758	10:12	0.776557	0.414894	0.361663	0.361663	3.18609e-22	2.97948e-19
SRSF2_K562	GUF1	9	4:44690024-44690163	8:10	1	0.641026	0.358974	0.358974	8.25157e-05	0.00397329
SRSF2_K562	RCOR3	13	1:211485579-211485829	12:14	0.567568	0.208791	0.358776	0.358776	0.00012928	0.00569441
SRSF2_K562	GIGYF2	2	2:233565295-233565364	1:3	0.264706	0.622951	-0.358245	0.358245	0.00120153	0.0319627
SRSF2_K562	BAZ1A	13	14:35255332-35255427	12:14	0.75	0.394737	0.355263	0.355263	0.000542834	0.0176923
SRSF2_K562	ACACA	37	17:35567381-35567404	36:38	0.8125	0.458333	0.354167	0.354167	2.03722e-05	0.00131737
SRSF2_K562	FUK	10	16:70503055-70503226	9:11	0.655172	1	-0.344828	0.344828	0.000186293	0.00767716
SRSF2_K562	HCFC1R1	2	16:3073475-3073531	1:3	0.644444	0.301587	0.342857	0.342857	0.000750478	0.0226391
SRSF2_K562	FAM64A	6	17:6353348-6353392	5:7	1	0.659091	0.340909	0.340909	6.70834e-05	0.0033561
SRSF2_K562	SNAPIN	2	1:153631614-153631660	1:3	0.91954	0.579832	0.339708	0.339708	3.62457e-08	5.2457e-06
SRSF2_K562	PTS	3	11:112100931-112100953	2:4	0.820755	0.48227	0.338485	0.338485	3.67695e-08	5.25891e-06
SRSF2_K562	ZNF74	3	22:20749623-20749708	2:4	0.630435	0.292035	0.338399	0.338399	2.92842e-05	0.00171985
SRSF2_K562	MED31	3	17:6553302-6553398	2:4	0.786885	0.45614	0.330745	0.330745	2.60106e-05	0.00159702
SRSF2_K562	NAB2	6	12:57487190-57487381	5:7	0.875	0.545455	0.329545	0.329545	0.000155687	0.00666439
SRSF2_K562	ARMC7	3	17:73109744-73110732	2:4	0.179487	0.508197	-0.32871	0.32871	0.00136804	0.0352357
SRSF2_K562	CHEK1	9	11:125507344-125507439	8:10	0.934783	0.613475	0.321307	0.321307	3.49545e-10	7.72622e-08
SRSF2_K562	RNH1	3	11:504824-504996	2:4	0.8	0.478927	0.321073	0.321073	1.1584e-05	0.000818762
SRSF2_K562	TNRC6A	11	16:24807228-24807260	10:12	0.852941	0.532258	0.320683	0.320683	0.00175715	0.0422167
SRSF2_K562	STX18	8	4:4426891-4426949	7:9	0.973684	0.656716	0.316968	0.316968	8.26842e-05	0.00397329
SRSF2_K562	NOL8	10	9:95073428-95073541	9:11	0.892857	0.576159	0.316698	0.316698	1.15279e-05	0.000818762
SRSF2_K562	IP6K2	8	3:48752748-48752960	7:9	0.0196078	0.335165	-0.315557	0.315557	3.33047e-18	2.24936e-15
SRSF2_K562	NDE1	13	16:15793016-15794487	12:15	0.447368	0.76	-0.312632	0.312632	0.00153559	0.0386505
SRSF2_K562	DENND5A	9	11:9192174-9192324	8:10	1	0.6875	0.3125	0.3125	3.05267e-05	0.0017672
SRSF2_K562	RBM5	8	3:50141681-50141741	7:9	0.866667	0.554545	0.312121	0.312121	1.35996e-06	0.000127177
SRSF2_K562	RBM6	33	3:50141681-50141741	32:34	0.866667	0.554545	0.312121	0.312121	1.35996e-06	0.000127177
SRSF2_K562	CHD3	39	17:7813746-7813909	38:40	1	0.691358	0.308642	0.308642	3.19215e-06	0.000262209
SRSF2_K562	CARS	3	11:3068983-3069231	1:4	0.228758	0.535088	-0.30633	0.30633	3.74121e-07	4.09746e-05
SRSF2_K562	VHL	2	3:10184229-10184705	1:3	0.117647	0.423963	-0.306316	0.306316	2.16475e-09	4.17728e-07
SRSF2_K562	SEC31A	19	4:83783687-83783725	18:20	0.782609	0.476744	0.305865	0.305865	0.000799528	0.0235348
SRSF2_K562	NELF	5	9:140349691-140349783	4:7	0.835294	0.530233	0.305062	0.305062	7.44833e-07	7.60919e-05
SRSF2_K562	PLCB2	31	15:40582226-40582283	30:32	0.971429	0.666667	0.304762	0.304762	0.00160414	0.039799
SRSF2_K562	C1orf85	2	1:156264550-156264807	1:3	0.919355	0.615385	0.30397	0.30397	5.25743e-05	0.00278792
SRSF2_K562	R3HDM2	8	12:57691111-57691170	7:9	1	0.69697	0.30303	0.30303	0.00155778	0.039128
SRSF2_K562	KIAA0494	7	1:47154025-47154216	6:8	0.468085	0.769231	-0.301146	0.301146	0.000563524	0.0181718
SRSF2_K562	CLK4	7	5:178044345-178044435	6:8	0.526316	0.826667	-0.300351	0.300351	0.00147323	0.0374549
SRSF2_K562	CDK5RAP2	13	9:123280035-123280164	12:14	0.0416667	0.340659	-0.298993	0.298993	4.07478e-05	0.00228282
SRSF2_K562	FAHD2B	2	2:97757600-97757722	1:3	0.854167	0.555556	0.298611	0.298611	0.000904931	0.0252902
SRSF2_K562	RPUSD1	2	16:837556-837744	1:3	0.681818	0.980392	-0.298574	0.298574	0.00067084	0.0208599
SRSF2_K562	GOSR1	7	17:28817144-28817235	5:8	1	0.703297	0.296703	0.296703	0.000115871	0.00521722
SRSF2_K562	TEX261	3	2:71218960-71219113	2:4	0.843373	0.546875	0.296498	0.296498	1.44812e-06	0.000134388
SRSF2_K562	KIF23	21	15:69733107-69733418	20:22	0.409639	0.704348	-0.294709	0.294709	4.16542e-05	0.00231228
SRSF2_K562	UPF3B	8	X:118974609-118974647	7:9	0.482143	0.188119	0.294024	0.294024	0.000202532	0.00820729
SRSF2_K562	C17orf62	2	17:80407307-80407356	1:3	0.157895	0.45	-0.292105	0.292105	0.00198937	0.04642
SRSF2_K562	PIF1	5	15:65113566-65113719	4:6	1	0.709677	0.290323	0.290323	0.000851797	0.0243688
SRSF2_K562	LGALS8	12	1:236706215-236706340	11:13	0.597403	0.308057	0.289346	0.289346	1.10062e-05	0.000791727
SRSF2_K562	USP8	13	15:50776472-50776558	12:14	0.568182	0.280374	0.287808	0.287808	0.00140063	0.0359228
SRSF2_K562	GOLGA2	7	9:131029473-131029553	6:8	0.775	0.491857	0.283143	0.283143	1.11208e-10	2.70391e-08
SRSF2_K562	ST6GALNAC1	7	17:74622371-74622474	6:8	0.732558	0.45098	0.281578	0.281578	0.0017245	0.0416795
SRSF2_K562	AURKB	2	17:8113495-8113572	1:3	0.88	0.598746	0.281254	0.281254	1.56779e-10	3.73719e-08
SRSF2_K562	MITD1	4	2:99787806-99787892	3:5	0.778947	0.5	0.278947	0.278947	7.60391e-05	0.00375775
SRSF2_K562	ITGB3BP	2	1:63975736-63975852	1:3	0.221519	0.5	-0.278481	0.278481	5.17214e-08	7.14519e-06
SRSF2_K562	MPP1	10	X:154012303-154012383	9:11	0.968791	0.693767	0.275024	0.275024	1.44912e-69	4.40424e-66
SRSF2_K562	KLHDC10	2	7:129736761-129736847	1:3	0.5	0.225225	0.274775	0.274775	0.000453102	0.0154729
SRSF2_K562	RYK	11	3:133896785-133896917	10:12	1	0.725806	0.274194	0.274194	0.00212323	0.0487942
SRSF2_K562	STARD4	4	5:110837660-110837786	3:5	0.582781	0.310559	0.272222	0.272222	1.51692e-06	0.000137621
SRSF2_K562	PLEC	39	8:144996672-145000052	38:40	0.619048	0.89011	-0.271062	0.271062	0.00012256	0.00543781
SRSF2_K562	C1orf144	2	1:16717870-16717919	1:3	0.405405	0.134956	0.27045	0.27045	1.28329e-09	2.60016e-07
SRSF2_K562	ARAP1	34	11:72403798-72403830	33:35	0.747368	0.477477	0.269891	0.269891	0.000105398	0.0048535
SRSF2_K562	NUMB	11	14:73745989-73746132	10:12	0.32	0.589552	-0.269552	0.269552	0.00028396	0.0108899
SRSF2_K562	RICTOR	9	5:38978685-38978752	8:10	0.730769	1	-0.269231	0.269231	0.00036553	0.0129448
SRSF2_K562	ZYG11A	3	1:53322670-53323421	2:4	0.678571	0.947368	-0.268797	0.268797	0.00170479	0.0413676
SRSF2_K562	BRWD2	13	10:122638517-122640074	12:14	0	0.268293	-0.268293	0.268293	0.000802187	0.023556
SRSF2_K562	MARCH7	12	2:160621137-160621185	11:13	0.923077	0.655172	0.267905	0.267905	1.67492e-08	2.8679e-06
SRSF2_K562	RHEBL1	3	12:49460751-49460818	2:4	1	0.735849	0.264151	0.264151	0.000557484	0.0180248
SRSF2_K562	CASP3	2	4:185569619-185569785	1:4	0.578947	0.842593	-0.263645	0.263645	0.00148701	0.0376617
SRSF2_K562	FGFR1OP2	5	12:27113448-27113561	4:6	0.608247	0.345324	0.262924	0.262924	0.000106133	0.00486888
SRSF2_K562	PLEKHA4	19	19:49342462-49342520	18:20	0.586207	0.323864	0.262343	0.262343	6.07742e-05	0.00314396
SRSF2_K562	FAM193B	7	5:176958954-176959201	6:8	0.916667	0.655914	0.260753	0.260753	2.33638e-05	0.00145658
SRSF2_K562	GCLM	2	1:94370079-94370144	1:3	0.941176	0.680556	0.260621	0.260621	7.58139e-08	9.91042e-06
SRSF2_K562	MARK3	4	14:103915256-103915304	3:5	1	0.741176	0.258824	0.258824	5.654e-06	0.0004323
SRSF2_K562	BAT2L	16	9:134349841-134351922	15:17	0.533333	0.788571	-0.255238	0.255238	0.00105868	0.0287926
SRSF2_K562	SUV420H2	3	19:55853583-55853748	2:4	0.702703	0.447552	0.25515	0.25515	0.000526514	0.0173057
SRSF2_K562	CDC16	2	13:115002120-115002174	1:3	1	0.744966	0.255034	0.255034	1.39342e-07	1.69398e-05
SRSF2_K562	TNFSF9	2	19:6532797-6532827	1:3	1	0.745902	0.254098	0.254098	4.82641e-07	5.10214e-05
SRSF2_K562	RCE1	7	11:66612971-66613033	6:8	0.974684	0.721893	0.25279	0.25279	3.1963e-07	3.5649e-05
SRSF2_K562	CLK1	5	2:201724848-201725154	4:6	0.53125	0.783784	-0.252534	0.252534	0.000469906	0.0158685
SRSF2_K562	PPIL3	13	2:201724848-201725154	12:14	0.53125	0.783784	-0.252534	0.252534	0.000469906	0.0158685
SRSF2_K562	C16orf13	2	16:685612-685774	1:3	0.353846	0.101538	0.252308	0.252308	5.48062e-12	1.9085e-09
SRSF2_K562	MYO9B	37	19:17321142-17321189	36:38	0.885246	0.633028	0.252218	0.252218	0.000331515	0.0122499
SRSF2_K562	LRP8	19	1:53715052-53715228	18:20	0.333333	0.585106	-0.251773	0.251773	0.000985332	0.0272863
SRSF2_K562	UBE2J2	6	1:1197649-1197770	5:7	0.00884956	0.260274	-0.251424	0.251424	2.5105e-11	7.44393e-09
SRSF2_K562	KAT2B	17	3:20189895-20189979	16:18	1	0.75	0.25	0.25	0.00159618	0.0396825
SRSF2_K562	TREX2	11	X:152720335-152720511	10:12	0.414894	0.16568	0.249213	0.249213	1.4953e-05	0.00101555
SRSF2_K562	HAUS7	13	X:152720335-152720511	12:14	0.414894	0.16568	0.249213	0.249213	1.4953e-05	0.00101555
SRSF2_K562	ST6GALNAC1	2	17:74633682-74633818	1:3	0.457143	0.705426	-0.248283	0.248283	1.02699e-05	0.000747611
SRSF2_K562	SLC25A36	5	3:140685842-140685878	4:6	0.310345	0.0625	0.247845	0.247845	0.00171802	0.0416056
SRSF2_K562	SEC16A	30	9:139340097-139340171	29:31	0.979592	0.732143	0.247449	0.247449	0.000296922	0.0112802
SRSF2_K562	SLC12A4	11	16:67988007-67988122	10:12	0	0.246914	-0.246914	0.246914	0.00033678	0.0123917
SRSF2_K562	OSBPL8	7	12:76853639-76853675	5:8	0.185714	0.429688	-0.243973	0.243973	0.000546635	0.0177686
SRSF2_K562	FIP1L1	11	4:54280782-54280889	10:12	0.577586	0.334661	0.242925	0.242925	1.3731e-05	0.000948456
SRSF2_K562	LEF1	7	4:109002742-109002825	6:8	0.333333	0.0909091	0.242424	0.242424	0.00174106	0.0419961
SRSF2_K562	MRPL22	3	5:154330381-154330498	2:4	0.929577	0.687307	0.242271	0.242271	2.46034e-12	9.64849e-10
SRSF2_K562	ZNF273	9	7:64377408-64377496	8:10	0.358491	0.116466	0.242025	0.242025	9.55816e-05	0.00450382
SRSF2_K562	SH3GLB2	7	9:131772949-131772972	6:8	1	0.759615	0.240385	0.240385	1.4652e-08	2.54463e-06
SRSF2_K562	TRIM5	7	11:5688919-5688941	6:8	1	0.76	0.24	0.24	0.00132538	0.0345025
SRSF2_K562	MECR	7	1:29529643-29529745	6:8	0.976471	0.739837	0.236633	0.236633	1.72344e-06	0.000150733
SRSF2_K562	HMGN1	7	21:40717756-40719218	6:8	0.697368	0.462264	0.235104	0.235104	0.000177607	0.0073944
SRSF2_K562	CAST	11	5:96064857-96064913	9:12	0.810345	0.575916	0.234429	0.234429	2.08206e-05	0.00133924
SRSF2_K562	JKAMP	7	14:59967909-59969468	6:8	1	0.765957	0.234043	0.234043	0.00196849	0.0460209
SRSF2_K562	ACADM	3	1:76194074-76194173	1:4	0.828283	0.596154	0.232129	0.232129	2.00215e-08	3.13779e-06
SRSF2_K562	C6orf48	3	6:31804201-31804294	2:4	0.228322	0.459807	-0.231485	0.231485	1.11653e-63	2.71474e-60
SRSF2_K562	MAP7D1	6	1:36640499-36640609	5:7	0.96875	0.741627	0.227123	0.227123	1.50767e-05	0.00101827
SRSF2_K562	C11orf17	3	11:8934000-8934080	2:4	0.653846	0.426829	0.227017	0.227017	0.00147577	0.0374549
SRSF2_K562	TBC1D23	15	3:100030677-100030721	14:16	0.875	0.649254	0.225746	0.225746	0.000232967	0.00919541
SRSF2_K562	C12orf76	7	12:110482225-110482338	6:8	0.0645161	0.289855	-0.225339	0.225339	0.000158116	0.00672104
SRSF2_K562	ATP5C1	9	10:7848937-7848973	8:10	0.976909	0.754414	0.222495	0.222495	2.45002e-32	3.72311e-29
SRSF2_K562	ZC3H7A	19	16:11855262-11855367	18:20	1	0.777778	0.222222	0.222222	2.14988e-05	0.00136838
SRSF2_K562	TCEB1	3	8:74876722-74876860	2:4	0.42515	0.64557	-0.22042	0.22042	5.01917e-06	0.000391141
SRSF2_K562	ABI1	10	10:27044584-27044670	9:11	0.342857	0.122642	0.220216	0.220216	0.000621004	0.0195079
SRSF2_K562	HIC2	3	22:21797048-21797146	1:4	0.923077	0.704545	0.218531	0.218531	0.00084733	0.0243522
SRSF2_K562	GYPB	5	4:145039867-145039905	4:6	0.905263	0.689286	0.215977	0.215977	5.31327e-16	2.80841e-13
SRSF2_K562	GYPA	6	4:145039867-145039918	5:7	0.905263	0.689286	0.215977	0.215977	5.31327e-16	2.80841e-13
SRSF2_K562	EXOC1	13	4:56757481-56757588	12:14	1	0.784946	0.215054	0.215054	4.70975e-06	0.000374225
SRSF2_K562	AC004381.6	20	16:20855256-20855348	19:21	0.98374	0.769517	0.214223	0.214223	2.27503e-09	4.32148e-07
SRSF2_K562	C2orf29	4	2:101874253-101874417	3:5	1	0.7875	0.2125	0.2125	3.54509e-07	3.91797e-05
SRSF2_K562	SUGP2	10	19:19114305-19114417	9:11	0.0322581	0.244292	-0.212034	0.212034	4.82124e-16	2.79104e-13
SRSF2_K562	CHD1L	11	1:146742593-146742666	10:12	0.798165	0.586538	0.211627	0.211627	0.0010112	0.0276874
SRSF2_K562	PUF60	7	8:144902836-144902886	6:8	0.564516	0.353319	0.211197	0.211197	1.12123e-06	0.000109046
SRSF2_K562	SFRS6	3	20:42087793-42088060	2:4	0.294118	0.502959	-0.208841	0.208841	0.000167576	0.00704922
SRSF2_K562	PRC1	14	15:91512309-91512350	13:15	0.490196	0.281588	0.208608	0.208608	4.07226e-06	0.000327858
SRSF2_K562	TSEN15	4	1:184039750-184039866	3:5	0.0357143	0.243243	-0.207529	0.207529	2.74718e-09	5.13808e-07
SRSF2_K562	ZBTB8OS	5	1:33097428-33097480	4:6	0.669811	0.463415	0.206397	0.206397	0.00211546	0.0487076
SRSF2_K562	TAF1	38	X:70679000-70679101	37:39	0.493671	0.7	-0.206329	0.206329	0.00193752	0.0453844
SRSF2_K562	UBA2	3	19:34921481-34921564	1:4	0.879433	0.673953	0.20548	0.20548	3.43001e-11	9.69735e-09
SRSF2_K562	C16orf35	4	16:174936-175066	3:5	0.19	0.395349	-0.205349	0.205349	0.00086922	0.0246551
SRSF2_K562	TAL1	3	1:47694868-47695023	1:4	1	0.795918	0.204082	0.204082	0.000870038	0.0246551
SRSF2_K562	NOTUM	6	17:79915682-79915784	5:7	0.796296	1	-0.203704	0.203704	0.0020829	0.0481404
SRSF2_K562	PLAGL1	9	6:144269115-144269597	8:10	0.785714	0.988889	-0.203175	0.203175	4.10999e-05	0.00229198
SRSF2_K562	KDM1A	3	1:23370920-23370979	2:4	0.550725	0.347826	0.202899	0.202899	2.92716e-05	0.00171985
SRSF2_K562	FASTKD1	12	2:170394523-170394651	11:13	0.855556	0.653061	0.202494	0.202494	0.000822134	0.0238907
SRSF2_K562	POLB	2	8:42196530-42196587	1:3	0.445545	0.244147	0.201397	0.201397	0.000224477	0.00894742
SRSF2_K562	NOSTRIN	10	2:169687982-169688048	9:11	1	0.798942	0.201058	0.201058	0.00110269	0.0298561
SRSF2_K562	NASP	7	1:46072993-46074009	6:8	0.354788	0.153766	0.201022	0.201022	4.65991e-20	3.33238e-17
SRSF2_K562	TPRKB	3	2:73959711-73959827	2:4	0.213793	0.414545	-0.200752	0.200752	3.75226e-05	0.0021316
SRSF2_K562	FAM173A	4	16:772084-772134	3:5	0.53012	0.32967	0.20045	0.20045	3.90811e-05	0.00220981
SRSF2_K562	PEX19	2	1:160253320-160253429	1:3	0.943182	0.742857	0.200325	0.200325	2.6992e-05	0.00162447
SRSF2_K562	HUWE1	53	X:53589792-53589890	52:54	0.98	0.782383	0.197617	0.197617	1.25894e-06	0.000120511
SRSF2_K562	VRK3	14	19:50484911-50485445	13:15	0.056338	0.252427	-0.196089	0.196089	0.000844209	0.0243369
SRSF2_K562	LTBP4	29	19:41128855-41128926	28:30	0.692308	0.496269	0.196039	0.196039	6.981e-06	0.000527131
SRSF2_K562	SAPS2	18	22:50875417-50875497	17:19	0.86747	0.672414	0.195056	0.195056	0.000821811	0.0238907
SRSF2_K562	TIMM17B	4	X:48752635-48753255	3:5	0.0788591	0.273913	-0.195054	0.195054	1.6566e-20	1.34262e-17
SRSF2_K562	DCAF8	15	1:160194852-160194909	14:16	0.858209	0.664948	0.193261	0.193261	6.42792e-05	0.00326963
SRSF2_K562	PEX19	17	1:160194852-160194909	16:18	0.858209	0.664948	0.193261	0.193261	6.42792e-05	0.00326963
SRSF2_K562	RILPL2	2	12:123915055-123915206	1:3	1	0.807453	0.192547	0.192547	0.000526702	0.0173057
SRSF2_K562	KARS	3	16:75678181-75678360	2:4	0.280443	0.471947	-0.191504	0.191504	8.20409e-08	1.04986e-05
SRSF2_K562	TMEM126A	2	11:85361293-85361385	1:3	0.915493	0.724409	0.191084	0.191084	0.00162458	0.0401423
SRSF2_K562	PRPF38B	2	1:109236212-109236264	1:3	0.304348	0.116197	0.188151	0.188151	5.13829e-06	0.000397873
SRSF2_K562	ACCS	15	11:44104974-44105127	14:16	0.982456	0.796296	0.18616	0.18616	0.00164986	0.0404382
SRSF2_K562	AHCYL1	18	1:110563353-110563473	17:19	1	0.815126	0.184874	0.184874	1.27667e-09	2.60016e-07
SRSF2_K562	TUSC3	12	8:15615300-15615368	11:13	0.815789	1	-0.184211	0.184211	0.000371581	0.0130937
SRSF2_K562	RBM42	5	19:36123838-36123903	4:6	0.489796	0.306513	0.183283	0.183283	0.00189047	0.0446262
SRSF2_K562	GPBP1	8	5:56532940-56532999	7:9	0.316327	0.133333	0.182993	0.182993	0.000288394	0.0110252
SRSF2_K562	NIF3L1	7	2:201761799-201761937	6:8	1	0.81746	0.18254	0.18254	6.57699e-07	6.83388e-05
SRSF2_K562	NAP1L4	2	11:3010359-3010501	1:3	0.0340909	0.216	-0.181909	0.181909	2.29487e-05	0.00143808
SRSF2_K562	CHID1	12	11:893427-893519	11:13	0.75	0.568182	0.181818	0.181818	0.000118154	0.00530036
SRSF2_K562	ADAMTS14	2	10:72434312-72434751	1:3	0.818182	1	-0.181818	0.181818	2.01322e-08	3.13779e-06
SRSF2_K562	SKA1	3	18:47906496-47906620	2:4	0.972222	0.790541	0.181682	0.181682	0.000197346	0.00809405
SRSF2_K562	FLNA	30	X:153585619-153585642	29:31	0.733624	0.553191	0.180433	0.180433	1.99057e-10	4.65372e-08
SRSF2_K562	GDA	6	9:74812378-74812475	4:7	0	0.18018	-0.18018	0.18018	0.000100165	0.00468349
SRSF2_K562	VEGFA	6	6:43748469-43748591	5:7	0.260638	0.0806357	0.180003	0.180003	1.41462e-25	1.56342e-22
SRSF2_K562	TAF1D	5	11:93469860-93469917	4:6	1	0.820312	0.179688	0.179688	4.15578e-08	5.80711e-06
SRSF2_K562	RP11-658F2.1	6	11:66410921-66411611	5:7	0.706977	0.883459	-0.176482	0.176482	1.98363e-08	3.13779e-06
SRSF2_K562	RBM14	6	11:66410921-66411611	5:7	0.706977	0.883459	-0.176482	0.176482	1.98363e-08	3.13779e-06
SRSF2_K562	RBM4	3	11:66410921-66411611	2:4	0.706977	0.883459	-0.176482	0.176482	1.98363e-08	3.13779e-06
SRSF2_K562	ZNF384	10	12:6781516-6781698	9:11	0.252252	0.0761421	0.17611	0.17611	5.19684e-05	0.00277683
SRSF2_K562	NUPL1	3	13:25883385-25883420	2:4	0.952941	0.77707	0.175871	0.175871	0.0002087	0.00837349
SRSF2_K562	DMPK	9	19:46280585-46280848	8:10	1	0.824176	0.175824	0.175824	0.000638389	0.0199509
SRSF2_K562	MAZ	6	16:29820861-29821092	5:7	0.572464	0.746849	-0.174385	0.174385	3.02988e-10	6.94985e-08
SRSF2_K562	DBF4	2	7:87507368-87507540	1:3	1	0.825843	0.174157	0.174157	4.35131e-05	0.00238283
SRSF2_K562	VCL	23	10:75871667-75871870	22:24	0.028169	0.201835	-0.173666	0.173666	8.57192e-11	2.12671e-08
SRSF2_K562	CNPY3	4	6:42903150-42903211	3:5	0.22	0.046729	0.173271	0.173271	8.72951e-06	0.000639305
SRSF2_K562	PI4KAP2	15	22:21830933-21831069	14:16	0.270833	0.0978261	0.173007	0.173007	0.000254432	0.00988222
SRSF2_K562	C20orf3	8	20:24949528-24949720	7:9	0.815385	0.988372	-0.172987	0.172987	0.000181159	0.00751655
SRSF2_K562	RP11-514O12.4	8	6:167347579-167348580	7:9	0.982143	0.810526	0.171617	0.171617	7.05881e-11	1.78779e-08
SRSF2_K562	RNASET2	8	6:167347579-167348580	7:9	0.982143	0.810526	0.171617	0.171617	7.05881e-11	1.78779e-08
SRSF2_K562	AC090699.1	2	17:74555027-74555125	1:3	0.478673	0.64986	-0.171187	0.171187	7.19295e-05	0.0035838
SRSF2_K562	EHMT1	8	9:140646783-140646860	7:9	0.829268	1	-0.170732	0.170732	0.000298663	0.0113111
SRSF2_K562	AKR1C2	7	10:5041392-5041469	5:8	0.942529	0.77193	0.170599	0.170599	0.000384497	0.0134707
SRSF2_K562	PIGF	2	2:46842076-46842324	1:3	1	0.829787	0.170213	0.170213	0.0010427	0.0284218
SRSF2_K562	IRF3	2	19:50167700-50168103	1:3	0.977778	0.808	0.169778	0.169778	8.26883e-05	0.00397329
SRSF2_K562	MAGOH	3	1:53699214-53699324	2:4	0.756757	0.58858	0.168177	0.168177	1.05302e-07	1.30628e-05
SRSF2_K562	DTL	2	1:212216335-212216460	1:3	0.988372	0.820388	0.167984	0.167984	1.52101e-05	0.0010216
SRSF2_K562	ALAS2	5	X:55050190-55050300	4:6	0.471698	0.639648	-0.167949	0.167949	1.73498e-08	2.88934e-06
SRSF2_K562	PCYT2	8	17:79865080-79865133	7:9	0.335135	0.50303	-0.167895	0.167895	0.00163554	0.0402495
SRSF2_K562	AP2B1	18	17:33997876-33997917	17:19	0.379845	0.212308	0.167537	0.167537	0.000354757	0.0127738
SRSF2_K562	DRAM2	6	1:111667364-111667503	5:7	1	0.833333	0.166667	0.166667	7.97926e-08	1.03196e-05
SRSF2_K562	TMX2	3	11:57505308-57505498	2:4	0.889632	0.723256	0.166376	0.166376	3.23538e-08	4.79665e-06
SRSF2_K562	PLEKHM2	7	1:16047824-16047883	6:8	0.684783	0.85	-0.165217	0.165217	0.00114113	0.0307599
SRSF2_K562	TXNL4A	2	18:77746602-77746750	1:3	0.0891089	0.253968	-0.164859	0.164859	4.28721e-06	0.000342892
SRSF2_K562	AP001011.3	35	18:2760650-2760737	34:36	0.783133	0.947917	-0.164784	0.164784	0.00135337	0.034932
SRSF2_K562	HAGH	7	16:1869116-1869224	6:8	0.943089	0.778443	0.164646	0.164646	0.000100986	0.00470376
SRSF2_K562	PLSCR1	6	3:146246401-146246618	5:7	0.782609	0.947059	-0.16445	0.16445	0.000478511	0.0159815
SRSF2_K562	GAPVD1	20	9:128104498-128104578	19:21	0.976471	0.812834	0.163636	0.163636	9.11927e-05	0.00433058
SRSF2_K562	IDI1	5	10:1089939-1092402	1:6	0.539062	0.375796	0.163266	0.163266	3.59314e-08	5.2457e-06
SRSF2_K562	PEX16	5	11:45937019-45937119	4:6	1	0.836957	0.163043	0.163043	0.000172541	0.00723305
SRSF2_K562	EIF4A2	4	3:186502751-186502890	3:5	0.704209	0.866947	-0.162738	0.162738	4.20224e-25	4.25722e-22
SRSF2_K562	ZNHIT3	2	17:34842779-34842810	1:3	0.84	0.6781	0.1619	0.1619	0.000366293	0.0129448
SRSF2_K562	CHAF1A	4	19:4418017-4418073	3:5	0.875	0.713178	0.161822	0.161822	0.000808493	0.023684
SRSF2_K562	UBAP2L	30	1:154241838-154241888	29:31	0.277778	0.116883	0.160895	0.160895	0.00114489	0.030793
SRSF2_K562	API5	8	11:43348057-43348161	7:9	1	0.839416	0.160584	0.160584	1.62101e-07	1.93203e-05
SRSF2_K562	GRIPAP1	4	X:48854566-48854592	3:5	1	0.84	0.16	0.16	8.98102e-07	8.94936e-05
SRSF2_K562	YEATS2	16	3:183490093-183490351	15:17	0.825	0.984733	-0.159733	0.159733	0.000608023	0.0193501
SRSF2_K562	C1D	2	2:68280193-68280269	1:3	0.116959	0.275424	-0.158465	0.158465	0.00011128	0.0050668
SRSF2_K562	UBE2R2	2	9:33886879-33886965	1:3	1	0.842466	0.157534	0.157534	5.36285e-06	0.000412634
SRSF2_K562	HPCAL1	7	2:10548688-10548860	6:8	0.0740741	0.231183	-0.157109	0.157109	0.000420025	0.0144244
SRSF2_K562	ARHGEF12	12	11:120300421-120300540	11:13	0.843137	1	-0.156863	0.156863	0.000475074	0.0159104
SRSF2_K562	AXIN1	9	16:341190-341297	8:10	0.149123	0.305785	-0.156662	0.156662	0.00167266	0.0409145
SRSF2_K562	METTL5	5	2:170671987-170672038	4:6	0.957576	0.803607	0.153969	0.153969	1.9285e-11	5.86119e-09
SRSF2_K562	C19orf51	11	19:55670901-55670975	10:12	1	0.847222	0.152778	0.152778	0.000972254	0.0270474
SRSF2_K562	SAT1	4	X:23802411-23802520	3:5	0.2	0.0484988	0.151501	0.151501	1.64581e-05	0.00107571
SRSF2_K562	AURKA	3	20:54963743-54963840	2:4	0.704762	0.855305	-0.150544	0.150544	0.00115066	0.0308799
SRSF2_K562	HMGCS1	2	5:43307868-43307926	1:3	0.442568	0.292804	0.149764	0.149764	1.04286e-08	1.89225e-06
SRSF2_K562	SURF2	4	9:136226826-136227005	3:5	0.851064	1	-0.148936	0.148936	0.000154395	0.00665597
SRSF2_K562	TM2D1	6	1:62152464-62152593	5:7	0.0686275	0.217054	-0.148427	0.148427	0.00163463	0.0402495
SRSF2_K562	HNRNPA1	8	12:54676863-54677018	7:9	0.0561148	0.202781	-0.146666	0.146666	2.39619e-151	1.45653e-147
SRSF2_K562	ZUFSP	3	6:116981899-116982009	2:4	1	0.854369	0.145631	0.145631	0.00127483	0.0334732
SRSF2_K562	AKR1A1	2	1:46018108-46018235	1:3	0.288991	0.144645	0.144345	0.144345	2.82765e-06	0.000237074
SRSF2_K562	C11orf1	4	11:111753860-111753926	3:5	0.928571	0.784314	0.144258	0.144258	0.000720257	0.0221115
SRSF2_K562	MYL6	7	12:56554410-56554454	6:8	0.424098	0.280992	0.143106	0.143106	4.65182e-20	3.33238e-17
SRSF2_K562	CHID1	4	11:908542-908645	3:5	0.246988	0.390071	-0.143083	0.143083	0.00193739	0.0453844
SRSF2_K562	CHEK1	4	11:125497502-125497725	3:5	0.784314	0.925795	-0.141481	0.141481	0.000338409	0.0123917
SRSF2_K562	VKORC1	3	16:31104104-31104185	2:4	0.0539216	0.195402	-0.141481	0.141481	2.06973e-06	0.000176961
SRSF2_K562	OGT	4	X:70764417-70764485	3:5	0.959596	0.819444	0.140152	0.140152	0.00116789	0.0312732
SRSF2_K562	ELOVL5	3	6:53158890-53159289	2:4	0.140299	0.279176	-0.138878	0.138878	2.97852e-06	0.000246326
SRSF2_K562	FXR1	18	3:180693101-180693192	17:19	0.524823	0.662162	-0.137339	0.137339	0.000502732	0.0166532
SRSF2_K562	ARHGEF25	16	12:58009620-58009800	15:17	0.863158	1	-0.136842	0.136842	3.95094e-05	0.00222369
SRSF2_K562	PPP5C	6	19:46884773-46886733	5:7	0.831395	0.695522	0.135873	0.135873	0.000874143	0.0246565
SRSF2_K562	UBE2F	8	2:238925208-238925275	6:9	0.915254	0.779736	0.135519	0.135519	0.000206371	0.00830744
SRSF2_K562	RAP1GAP	24	1:21928177-21928290	23:25	1	0.864734	0.135266	0.135266	2.39768e-07	2.72417e-05
SRSF2_K562	AARS2	6	6:44274986-44275131	5:7	0.864865	1	-0.135135	0.135135	0.00164759	0.0404382
SRSF2_K562	TIMM8B	2	11:111956702-111957034	1:3	0.195876	0.330798	-0.134922	0.134922	0.00143635	0.0366696
SRSF2_K562	BAT3	26	6:31607277-31607423	25:27	0.738182	0.872222	-0.13404	0.13404	1.74371e-09	3.41908e-07
SRSF2_K562	LAS1L	9	X:64744444-64744494	8:10	0.281915	0.147945	0.13397	0.13397	0.000252014	0.00981967
SRSF2_K562	C6orf1	3	6:34215244-34215269	2:4	0.962264	0.828571	0.133693	0.133693	0.000157245	0.00670746
SRSF2_K562	MLF1IP	12	4:185621974-185622035	11:14	0.922619	0.791367	0.131252	0.131252	0.00130686	0.0340933
SRSF2_K562	C1D	4	2:68273476-68273542	3:5	1	0.868852	0.131148	0.131148	7.9715e-05	0.00387638
SRSF2_K562	TPD52L2	4	20:62507169-62507228	3:5	0.549587	0.680653	-0.131066	0.131066	0.000841119	0.0243369
SRSF2_K562	MRPL52	4	14:23300173-23300246	3:5	0.0625978	0.193411	-0.130813	0.130813	2.10665e-14	9.48538e-12
SRSF2_K562	BCL2L12	3	19:50170276-50170418	2:4	0.796646	0.666667	0.129979	0.129979	5.91761e-07	6.20175e-05
SRSF2_K562	P4HA1	11	10:74803645-74803715	10:12	0.728723	0.857471	-0.128748	0.128748	0.000257151	0.00995599
SRSF2_K562	ACIN1	12	14:23536523-23537880	11:13	0.305556	0.178363	0.127193	0.127193	0.00126052	0.0333134
SRSF2_K562	ITPA	2	20:3193815-3193872	1:3	0.973545	0.846939	0.126606	0.126606	1.05456e-05	0.000763112
SRSF2_K562	UBE2A	4	X:118715470-118715563	3:5	0.963303	0.837209	0.126093	0.126093	0.000463907	0.0157534
SRSF2_K562	TTF2	22	1:117639973-117640055	21:23	0.875	1	-0.125	0.125	0.000385938	0.0134823
SRSF2_K562	UNC50	5	2:99232670-99232809	4:6	1	0.876106	0.123894	0.123894	0.000343715	0.0125106
SRSF2_K562	PICALM	14	11:85701293-85701442	13:15	0.307463	0.183844	0.123619	0.123619	2.85133e-06	0.000237422
SRSF2_K562	MAN2B1	20	19:12760155-12760242	19:21	1	0.876712	0.123288	0.123288	8.7824e-05	0.00420345
SRSF2_K562	HIATL1	5	9:97203267-97203381	4:6	1	0.878543	0.121457	0.121457	0.00135254	0.034932
SRSF2_K562	JAK2	27	9:5126333-5126446	26:28	1	0.879121	0.120879	0.120879	0.000769	0.0230833
SRSF2_K562	H2AFY	8	5:134686513-134686603	7:9	0.140845	0.261719	-0.120874	0.120874	1.54671e-05	0.00103315
SRSF2_K562	SUMF2	4	7:56141867-56141911	3:5	0.935484	0.815094	0.12039	0.12039	0.000227896	0.00905402
SRSF2_K562	ARG2	4	14:68112360-68112519	3:5	0.991304	0.872093	0.119211	0.119211	1.7253e-08	2.88934e-06
SRSF2_K562	EIF2B5	6	3:183856635-183856727	5:7	0.0314961	0.149425	-0.117929	0.117929	0.000690534	0.0213609
SRSF2_K562	SRP9	3	1:225974564-225974687	2:4	0.190184	0.307475	-0.117291	0.117291	7.13135e-07	7.34711e-05
SRSF2_K562	PTPMT1	2	11:47591252-47591443	1:3	0.773585	0.889868	-0.116283	0.116283	0.000148521	0.00644845
SRSF2_K562	ACAA1	11	3:38167653-38167832	10:12	0.854701	0.970803	-0.116102	0.116102	0.000999445	0.0274893
SRSF2_K562	UFC1	5	1:161127911-161128001	4:6	0.953488	0.837423	0.116065	0.116065	2.28571e-08	3.47342e-06
SRSF2_K562	GTF3A	6	13:28006868-28006941	5:7	0.946502	0.830508	0.115994	0.115994	2.28816e-05	0.00143808
SRSF2_K562	MFGE8	9	15:89442887-89443042	8:10	0.906489	0.791291	0.115197	0.115197	4.05829e-08	5.73681e-06
SRSF2_K562	LSM14A	10	19:34717313-34717369	9:11	0.27907	0.163978	0.115091	0.115091	0.0014134	0.036174
SRSF2_K562	NADSYN1	14	11:71192402-71192450	13:15	1	0.885246	0.114754	0.114754	0.000363293	0.0129139
SRSF2_K562	RBCK1	2	20:390525-390669	1:3	0.861111	0.975845	-0.114734	0.114734	6.63149e-05	0.00334519
SRSF2_K562	KATNA1	7	6:149922730-149922888	6:8	1	0.885542	0.114458	0.114458	0.000592894	0.0189679
SRSF2_K562	UPF3A	8	13:115064315-115064475	7:9	0.874317	0.987805	-0.113488	0.113488	3.09243e-05	0.00178174
SRSF2_K562	FBXO22	2	15:76196832-76196970	1:3	0.872832	0.985663	-0.112831	0.112831	8.05389e-07	8.09183e-05
SRSF2_K562	RPL10	6	X:153628805-153628967	5:7	0.933378	0.820701	0.112677	0.112677	2.54186e-187	3.09014e-183
SRSF2_K562	PTBP1	9	19:805492-805569	8:10	0.648325	0.760736	-0.112411	0.112411	2.54804e-05	0.00157241
SRSF2_K562	RAG1AP1	3	1:155109304-155109427	2:4	0.786408	0.898592	-0.112184	0.112184	0.000401505	0.0138928
SRSF2_K562	COMMD4	3	15:75630696-75630765	2:4	0.948454	0.837209	0.111244	0.111244	0.000530193	0.0173735
SRSF2_K562	ATXN2	13	12:111948189-111948386	12:14	0.888889	1	-0.111111	0.111111	0.000784374	0.0233717
SRSF2_K562	UBE2G2	2	21:46221199-46221313	1:3	0.0437158	0.154661	-0.110945	0.110945	5.44322e-05	0.0028523
SRSF2_K562	TNXB	36	6:32011784-32011906	35:37	1	0.890805	0.109195	0.109195	9.61181e-05	0.00451162
SRSF2_K562	C9orf16	2	9:130924283-130925231	1:3	0.0625	0.171362	-0.108862	0.108862	9.16806e-08	1.14903e-05
SRSF2_K562	EIF4B	9	12:53421566-53421703	8:10	0.971609	0.863293	0.108316	0.108316	9.79733e-17	6.26875e-14
SRSF2_K562	WAC	9	10:28884662-28884970	8:10	0.80226	0.909492	-0.107232	0.107232	0.000362918	0.0129139
SRSF2_K562	CNIH	3	14:54898826-54898938	2:4	0.975309	0.869301	0.106008	0.106008	6.47914e-05	0.00328195
SRSF2_K562	PPP1R7	2	2:242092891-242093019	1:3	0.855769	0.960938	-0.105168	0.105168	0.000902685	0.0252856
SRSF2_K562	HNRNPH1	5	5:179046270-179046408	4:6	0.822485	0.926778	-0.104293	0.104293	2.59529e-07	2.92138e-05
SRSF2_K562	PPP4C	3	16:30092580-30092631	2:4	0.928339	0.824176	0.104163	0.104163	1.26349e-05	0.000877727
SRSF2_K562	MAGEA12	2	X:151901709-151901814	1:3	0.204545	0.10061	0.103936	0.103936	0.00168061	0.0410264
SRSF2_K562	C4orf43	5	4:164436465-164436613	4:6	0.879518	0.982558	-0.10304	0.10304	0.00100589	0.0276042
SRSF2_K562	NOL11	11	17:65733187-65733261	10:12	1	0.897436	0.102564	0.102564	5.44121e-05	0.0028523
SRSF2_K562	NUSAP1	9	15:41667910-41668026	8:10	0.966851	0.865047	0.101804	0.101804	7.05222e-11	1.78779e-08
SRSF2_K562	HDDC2	3	6:125619860-125619962	2:4	0.621622	0.723064	-0.101442	0.101442	1.23622e-05	0.00086372
SRSF2_K562	RALY	5	20:32661625-32661672	4:6	0.825974	0.724852	0.101122	0.101122	0.000177131	0.0073944
	gene_symbol	exon_skipped	coordonnees	exons_flanquants	psi_Huh7_SRSF2	psi_HuH7_SRSF2	deltaPSI	valeur abs deltaPSI	pvalue_Fisher	pvalue_corrigee_Fisher
SRSF2_Huh7	TMEM41A	5	3:185212942-185213874	4:6	0.189189	0.945946	-0.756757	0.756757	1.552e-11	2.93645e-09
SRSF2_Huh7	DFNA5	12	7:24745803-24745995	11:13	0.152941	0.828283	-0.675342	0.675342	4.29952e-21	3.02617e-18
SRSF2_Huh7	STK19	3	6:31940398-31940534	2:4	0.254902	0.928571	-0.673669	0.673669	3.68372e-09	4.46863e-07
SRSF2_Huh7	MEGF8	14	19:42853651-42853851	13:15	0.333333	1	-0.666667	0.666667	3.54269e-06	0.000226681
SRSF2_Huh7	FUK	3	16:70497526-70497677	2:4	0.333333	1	-0.666667	0.666667	3.71731e-05	0.00167717
SRSF2_Huh7	AKAP11	7	13:42871184-42871318	6:8	0.35	1	-0.65	0.65	0.00016156	0.00562934
SRSF2_Huh7	MTMR12	14	5:32235068-32235235	13:15	0.352941	1	-0.647059	0.647059	6.38751e-10	9.21267e-08
SRSF2_Huh7	HSD3B7	2	16:30996781-30997145	1:3	0.314286	0.9375	-0.623214	0.623214	1.49018e-07	1.28535e-05
SRSF2_Huh7	CCDC150	15	2:197559770-197559883	14:16	1	0.388889	0.611111	0.611111	0.000437569	0.0127475
SRSF2_Huh7	IFT88	29	13:21264844-21264954	28:30	0.194444	0.791667	-0.597222	0.597222	1.05375e-05	0.000590501
SRSF2_Huh7	C9orf86	9	9:139699809-139699909	8:10	0.292683	0.887324	-0.594641	0.594641	1.5288e-10	2.40185e-08
SRSF2_Huh7	KIAA1984	9	9:139699809-139699909	8:10	0.292683	0.887324	-0.594641	0.594641	1.5288e-10	2.40185e-08
SRSF2_Huh7	IMPA1	6	8:82588469-82588514	5:7	0.388889	0.981481	-0.592593	0.592593	1.13066e-07	1.0048e-05
SRSF2_Huh7	ANKRD52	5	12:56649568-56649768	4:6	0.373333	0.963768	-0.590435	0.590435	2.64221e-29	3.57324e-26
SRSF2_Huh7	IQGAP3	13	1:156524027-156524184	12:14	0.272727	0.862069	-0.589342	0.589342	2.99483e-05	0.0013759
SRSF2_Huh7	FAM76A	7	1:28075579-28075665	6:8	0.952381	0.368421	0.58396	0.58396	0.000107101	0.00407942
SRSF2_Huh7	CNKSR2	9	X:21534603-21534749	8:10	0.153846	0.733333	-0.579487	0.579487	0.000100188	0.00389165
SRSF2_Huh7	PLEKHA7	16	11:16823215-16823364	15:17	0.333333	0.909091	-0.575758	0.575758	0.000119657	0.00447024
SRSF2_Huh7	RBCK1	8	20:401515-401675	7:9	0.254545	0.824176	-0.56963	0.56963	1.35417e-11	2.61845e-09
SRSF2_Huh7	AGXT2L2	13	5:177642277-177643990	12:14	0.15	0.714286	-0.564286	0.564286	0.00138974	0.031217
SRSF2_Huh7	ABCA5	38	17:67247888-67248007	37:39	0.272727	0.833333	-0.560606	0.560606	0.000251992	0.00806192
SRSF2_Huh7	ABCA10	14	17:67247888-67248007	13:15	0.272727	0.833333	-0.560606	0.560606	0.000251992	0.00806192
SRSF2_Huh7	ZNF740	3	12:53578675-53578824	2:4	0.45614	1	-0.54386	0.54386	2.42883e-09	3.09693e-07
SRSF2_Huh7	AFMID	6	17:76200737-76200822	5:7	0.823529	0.28	0.543529	0.543529	0.00130747	0.0298566
SRSF2_Huh7	DNASE1	6	16:3705850-3705967	5:7	0.333333	0.875	-0.541667	0.541667	0.00104991	0.0252379
SRSF2_Huh7	WDHD1	22	14:55424310-55424353	21:23	0.44	0.978723	-0.538723	0.538723	1.84141e-07	1.54293e-05
SRSF2_Huh7	TRIM11	6	1:228588665-228588892	5:7	0.443038	0.973684	-0.530646	0.530646	1.71244e-14	5.47857e-12
SRSF2_Huh7	ACSL1	19	4:185687045-185687140	18:20	0.47541	1	-0.52459	0.52459	4.08978e-11	7.05527e-09
SRSF2_Huh7	ST6GALNAC6	3	9:130660235-130660289	2:5	0.0666667	0.590909	-0.524242	0.524242	0.0016359	0.0355375
SRSF2_Huh7	C13orf34	3	13:73305419-73305525	2:4	0.307692	0.826087	-0.518395	0.518395	4.09457e-05	0.00180257
SRSF2_Huh7	CBY1	5	22:39067075-39067193	4:6	0.483444	1	-0.516556	0.516556	3.03581e-20	1.90779e-17
SRSF2_Huh7	DPH5	5	1:101479266-101479374	4:6	0.315789	0.829787	-0.513998	0.513998	2.69545e-09	3.34008e-07
SRSF2_Huh7	C9orf3	23	9:97781732-97782515	22:24	0.438202	0.95	-0.511798	0.511798	2.75846e-05	0.00131539
SRSF2_Huh7	KIF12	7	9:116858331-116858487	6:8	0.319149	0.822581	-0.503432	0.503432	5.9408e-17	2.61336e-14
SRSF2_Huh7	BECN1	11	17:40963673-40964884	10:12	0.407692	0.910112	-0.50242	0.50242	4.78685e-15	1.71897e-12
SRSF2_Huh7	GMPR2	11	14:24707452-24707611	10:12	0.4	0.899225	-0.499225	0.499225	8.06035e-22	5.90958e-19
SRSF2_Huh7	CCDC138	14	2:109489907-109490045	13:15	0.416667	0.913043	-0.496377	0.496377	0.000508613	0.0143422
SRSF2_Huh7	CARKD	9	13:111289476-111289596	8:10	0.444444	0.939394	-0.494949	0.494949	2.78501e-05	0.00132446
SRSF2_Huh7	NT5E	7	6:86200226-86200375	6:8	0.362963	0.857143	-0.49418	0.49418	2.51791e-13	6.32932e-11
SRSF2_Huh7	EXOSC1	3	10:99202994-99203068	2:4	0.444444	0.933962	-0.489518	0.489518	6.01306e-16	2.40468e-13
SRSF2_Huh7	HAUS4	7	14:23417077-23417222	6:8	0.5	0.976744	-0.476744	0.476744	5.67007e-09	6.65137e-07
SRSF2_Huh7	GLIS3	7	9:4286038-4286523	5:14	1	0.52381	0.47619	0.47619	0.00172527	0.0371123
SRSF2_Huh7	ZNF444	3	19:56658259-56658577	2:4	0.50996	0.982456	-0.472496	0.472496	9.58799e-31	1.40592e-27
SRSF2_Huh7	OFD1	21	X:13781864-13781974	20:22	0.290909	0.7625	-0.471591	0.471591	6.4872e-08	6.07175e-06
SRSF2_Huh7	ZC3H4	15	19:47572349-47572600	14:16	0.25	0.72093	-0.47093	0.47093	4.00229e-05	0.00177839
SRSF2_Huh7	RBBP9	2	20:18476482-18476524	1:4	0.333333	0.8	-0.466667	0.466667	1.80984e-06	0.000125873
SRSF2_Huh7	RABEP2	2	16:28935724-28935936	1:3	0.44	0.903226	-0.463226	0.463226	0.000299998	0.00935952
SRSF2_Huh7	PTPMT1	2	11:47591252-47591443	1:3	0.0862944	0.548896	-0.462601	0.462601	4.78133e-43	8.41322e-40
SRSF2_Huh7	COG5	14	7:106921745-106921844	13:15	0.538462	1	-0.461538	0.461538	9.9717e-08	9.04444e-06
SRSF2_Huh7	RAD51	10	15:41022051-41022172	9:11	0.41791	0.878049	-0.460138	0.460138	2.5913e-09	3.2569e-07
SRSF2_Huh7	USF1	7	1:161011441-161011636	6:8	0.543478	1	-0.456522	0.456522	3.68723e-10	5.4067e-08
SRSF2_Huh7	NAB1	7	2:191548464-191548553	6:8	0.5	0.956522	-0.456522	0.456522	0.000177504	0.00605878
SRSF2_Huh7	CLK4	7	5:178044345-178044435	6:8	0.241379	0.694444	-0.453065	0.453065	0.00041988	0.0123496
SRSF2_Huh7	MAPKSP1	2	4:100815112-100815157	1:3	0.247059	0.69863	-0.451571	0.451571	1.33193e-08	1.47401e-06
SRSF2_Huh7	PDE3B	3	11:14807983-14808231	2:4	0.518519	0.969697	-0.451178	0.451178	3.16847e-06	0.000204972
SRSF2_Huh7	N6AMT2	3	13:21311862-21311944	2:4	0.378378	0.827586	-0.449208	0.449208	0.000366674	0.011029
SRSF2_Huh7	C2orf60	5	2:200803656-200803793	4:6	0.551724	1	-0.448276	0.448276	8.16823e-06	0.00046817
SRSF2_Huh7	PALLD	14	4:169798874-169799545	13:15	0.829268	0.382979	0.44629	0.44629	2.75543e-05	0.00131539
SRSF2_Huh7	C9orf114	11	9:131586026-131586173	10:12	0.425	0.870968	-0.445968	0.445968	3.56202e-08	3.60214e-06
SRSF2_Huh7	RAB11FIP3	7	16:541134-541268	6:8	0.121212	0.566667	-0.445455	0.445455	0.00036159	0.0109322
SRSF2_Huh7	YIF1A	7	11:66052852-66053007	6:8	0.335689	0.780488	-0.444799	0.444799	6.87435e-83	2.41922e-79
SRSF2_Huh7	MEGF8	32	19:42864927-42865158	31:33	0.555556	1	-0.444444	0.444444	1.48593e-05	0.000789921
SRSF2_Huh7	FDPS	10	1:155289585-155289719	9:11	0.300271	0.742821	-0.44255	0.44255	6.06393e-117	1.06701e-112
SRSF2_Huh7	TERF1	8	8:73942571-73942630	7:9	0.192308	0.634615	-0.442308	0.442308	3.95896e-07	3.13792e-05
SRSF2_Huh7	URB1	34	21:33694111-33694254	33:35	0.269231	0.705882	-0.436652	0.436652	0.000123862	0.00460028
SRSF2_Huh7	GK	22	X:30745583-30745669	21:23	0.661972	0.230769	0.431203	0.431203	3.48724e-06	0.000223947
SRSF2_Huh7	GCAT	2	22:38205956-38206164	1:3	0.52381	0.953488	-0.429679	0.429679	0.000101687	0.00393251
SRSF2_Huh7	TRIP11	15	14:92461696-92461859	14:16	0.571429	1	-0.428571	0.428571	0.00131839	0.0300109
SRSF2_Huh7	F7	6	13:113769974-113770114	5:7	0.37931	0.806452	-0.427141	0.427141	0.00133561	0.0303637
SRSF2_Huh7	PSEN2	11	1:227077736-227077834	10:12	0.536585	0.961538	-0.424953	0.424953	1.43524e-06	0.000102245
SRSF2_Huh7	PDXDC2P	16	16:70044654-70044759	15:17	0.578947	1	-0.421053	0.421053	0.000167596	0.00578238
SRSF2_Huh7	TRAPPC10	10	21:45494205-45494351	9:11	0.461538	0.880952	-0.419414	0.419414	0.000286152	0.00900738
SRSF2_Huh7	C12orf56	10	12:64671460-64671583	9:11	0.0952381	0.512821	-0.417582	0.417582	5.98295e-05	0.00249058
SRSF2_Huh7	EVI5L	8	19:7916567-7916656	7:9	0.583333	1	-0.416667	0.416667	0.00072534	0.0189927
SRSF2_Huh7	C12orf49	3	12:117158101-117158252	2:4	0.583333	1	-0.416667	0.416667	1.18998e-09	1.62317e-07
SRSF2_Huh7	SLMAP	24	3:57911572-57911661	23:25	0.238095	0.653846	-0.415751	0.415751	0.000937842	0.0230801
SRSF2_Huh7	GNB5	10	15:52427810-52427953	7:11	0.531915	0.946429	-0.414514	0.414514	1.14798e-06	8.38171e-05
SRSF2_Huh7	GRTP1	3	13:114009638-114009796	2:5	0.586207	1	-0.413793	0.413793	0.000116385	0.00436656
SRSF2_Huh7	TAZ	5	X:153642438-153642527	4:6	0.0869565	0.5	-0.413043	0.413043	1.69672e-05	0.000884393
SRSF2_Huh7	SNX24	6	5:122337635-122337775	5:7	0.5	0.912281	-0.412281	0.412281	7.75194e-07	5.77979e-05
SRSF2_Huh7	SOS2	16	14:50611888-50612050	15:18	0.555556	0.966667	-0.411111	0.411111	0.000811731	0.0206704
SRSF2_Huh7	C4orf19	4	4:37590465-37590521	2:5	0.590909	1	-0.409091	0.409091	0.000163501	0.00568569
SRSF2_Huh7	PCNT	34	21:47845745-47845885	33:35	0.590909	1	-0.409091	0.409091	0.00168348	0.0363467
SRSF2_Huh7	DBF4B	7	17:42809546-42809633	6:8	0.037037	0.444444	-0.407407	0.407407	0.0013881	0.031217
SRSF2_Huh7	XPNPEP3	3	22:41257622-41258683	1:4	0.407407	0	0.407407	0.407407	0.00101411	0.0245788
SRSF2_Huh7	FAM126A	4	7:23017888-23018067	3:5	0.592593	1	-0.407407	0.407407	5.74143e-07	4.43097e-05
SRSF2_Huh7	NUMB	11	14:73745989-73746132	10:12	0.084507	0.490909	-0.406402	0.406402	3.38029e-07	2.71596e-05
SRSF2_Huh7	MED24	7	17:38191169-38191225	6:8	0.75	0.346667	0.403333	0.403333	4.88198e-06	0.000300361
SRSF2_Huh7	STK19	5	6:31947191-31947330	4:6	0.533333	0.935484	-0.402151	0.402151	0.000126648	0.0046427
SRSF2_Huh7	C4A	3	6:31947191-31947330	2:4	0.533333	0.935484	-0.402151	0.402151	0.000126648	0.0046427
SRSF2_Huh7	ANK3	16	10:61959887-61960021	15:17	0.512821	0.909091	-0.39627	0.39627	0.00189055	0.0398874
SRSF2_Huh7	BRE	2	2:28115250-28115315	1:3	0.5	0.11	0.39	0.39	1.64831e-09	2.16446e-07
SRSF2_Huh7	MPI	5	15:75185479-75185661	4:6	0.588235	0.97619	-0.387955	0.387955	2.1234e-05	0.00105845
SRSF2_Huh7	RPAP1	21	15:41813936-41814078	20:22	0.615385	1	-0.384615	0.384615	0.000123005	0.00458559
SRSF2_Huh7	XXbac-B461K10.4	38	22:18291610-18291703	37:39	0.615385	1	-0.384615	0.384615	6.47869e-08	6.07175e-06
SRSF2_Huh7	MICAL3	38	22:18291610-18291703	37:39	0.615385	1	-0.384615	0.384615	6.47869e-08	6.07175e-06
SRSF2_Huh7	MPRIP	20	17:17078607-17078726	19:21	0.482353	0.866667	-0.384314	0.384314	4.81215e-08	4.76471e-06
SRSF2_Huh7	TRIM26	7	6:30164293-30164523	6:8	0.618182	1	-0.381818	0.381818	3.62419e-08	3.64407e-06
SRSF2_Huh7	PVR	6	19:45162010-45162168	5:7	0.47182	0.852903	-0.381084	0.381084	3.00091e-53	6.60049e-50
SRSF2_Huh7	DCAF11	2	14:24584322-24584502	1:3	0.833333	0.452381	0.380952	0.380952	0.000522674	0.0146916
SRSF2_Huh7	CECR5	3	22:17630432-17630635	2:4	0.43956	0.819672	-0.380112	0.380112	8.40387e-09	9.60224e-07
SRSF2_Huh7	SPAG9	19	17:49072418-49072585	18:20	0.620155	1	-0.379845	0.379845	1.95832e-19	1.14862e-16
SRSF2_Huh7	FAHD2A	6	2:96076612-96076774	5:7	0.444444	0.823529	-0.379085	0.379085	0.00042193	0.0123532
SRSF2_Huh7	SLC12A9	11	7:100458760-100458884	10:12	0.5	0.878378	-0.378378	0.378378	8.7024e-05	0.00344107
SRSF2_Huh7	CXorf38	2	X:40506259-40506393	1:3	0.625	1	-0.375	0.375	0.000159403	0.00558735
SRSF2_Huh7	PLAGL1	9	6:144269115-144269597	8:10	0.27451	0.647059	-0.372549	0.372549	0.000303353	0.00943074
SRSF2_Huh7	USO1	12	4:76716489-76716509	11:13	0.482759	0.111111	0.371648	0.371648	0.00031695	0.0097843
SRSF2_Huh7	IRF3	6	19:50164707-50165585	5:7	0.587189	0.958333	-0.371145	0.371145	1.91949e-22	1.4685e-19
SRSF2_Huh7	EHMT1	2	9:140605419-140605482	1:3	0.404255	0.775	-0.370745	0.370745	0.000554189	0.0153085
SRSF2_Huh7	SLC2A8	5	9:130164836-130165032	4:6	0.531429	0.901869	-0.370441	0.370441	7.85257e-17	3.37009e-14
SRSF2_Huh7	GCN1L1	56	12:120568989-120569137	55:57	0.632353	1	-0.367647	0.367647	5.33696e-12	1.11797e-09
SRSF2_Huh7	DMXL1	35	5:118542529-118542591	34:36	0.458333	0.0909091	0.367424	0.367424	0.00207286	0.0429822
SRSF2_Huh7	SUN1	11	7:889560-889670	10:12	0.75641	0.391304	0.365106	0.365106	2.56531e-06	0.000170982
SRSF2_Huh7	SLC41A3	5	3:125769741-125769893	3:6	0.6	0.964286	-0.364286	0.364286	0.00220327	0.0449754
SRSF2_Huh7	IVD	9	15:40707088-40707181	7:10	0.636364	1	-0.363636	0.363636	0.000307334	0.00953764
SRSF2_Huh7	TNIK	22	3:170824972-170824995	21:23	0.469388	0.107143	0.362245	0.362245	0.0011527	0.0272987
SRSF2_Huh7	RIT1	2	1:155880447-155880595	1:3	0.488372	0.85	-0.361628	0.361628	0.000543008	0.0150469
SRSF2_Huh7	C9orf3	27	9:97844857-97845001	26:28	0.171271	0.532051	-0.360781	0.360781	7.85332e-28	8.12865e-25
SRSF2_Huh7	PANX1	2	11:93886657-93886796	1:3	0.64	1	-0.36	0.36	0.00186431	0.0393809
SRSF2_Huh7	USPL1	2	13:31195210-31195376	1:3	0.975	0.615385	0.359615	0.359615	0.000205008	0.00687109
SRSF2_Huh7	RAP1GDS1	5	4:99300168-99300314	4:6	0.612903	0.972222	-0.359319	0.359319	0.000299442	0.00935877
SRSF2_Huh7	UPF3A	8	13:115064315-115064475	7:9	0.446809	0.805195	-0.358386	0.358386	6.51897e-05	0.00268009
SRSF2_Huh7	C9orf7	3	9:136330444-136330569	2:4	0.35	0.703125	-0.353125	0.353125	1.30023e-05	0.000701803
SRSF2_Huh7	CCM2	9	7:45108042-45108178	8:10	0.607843	0.96	-0.352157	0.352157	6.00595e-07	4.60843e-05
SRSF2_Huh7	SLC6A6	10	3:14509596-14509720	9:11	0.6	0.95098	-0.35098	0.35098	0.000102324	0.00394846
SRSF2_Huh7	CDC2L6	15	6:110942307-110942573	14:16	0.652174	1	-0.347826	0.347826	0.000125777	0.0046427
SRSF2_Huh7	DNM1L	17	12:32891198-32891230	16:18	0.833333	0.486111	0.347222	0.347222	1.06375e-05	0.000594217
SRSF2_Huh7	DAP3	6	1:155686795-155686919	4:7	0.558528	0.903509	-0.34498	0.34498	4.33687e-19	2.46166e-16
SRSF2_Huh7	PIGT	9	20:44050023-44050223	8:10	0.634615	0.979021	-0.344406	0.344406	1.60111e-13	4.33433e-11
SRSF2_Huh7	METTL11A	2	9:132394929-132395144	1:3	0.536036	0.879747	-0.343711	0.343711	3.43444e-13	8.51161e-11
SRSF2_Huh7	CFLAR	6	2:202000921-202004600	5:7	0.48	0.136364	0.343636	0.343636	0.000385539	0.0114594
SRSF2_Huh7	PBRM1	31	3:52592265-52592429	30:32	0.1	0.442308	-0.342308	0.342308	0.00129483	0.0296279
SRSF2_Huh7	UBAC1	11	9:138824816-138825361	10:12	0.4875	0.829787	-0.342287	0.342287	0.000137423	0.00495512
SRSF2_Huh7	ALAS1	2	3:52232688-52232864	1:3	0.554054	0.212389	0.341665	0.341665	1.84843e-08	1.9954e-06
SRSF2_Huh7	FBXW2	4	9:123540629-123540823	3:5	0.65285	0.992701	-0.339851	0.339851	6.68138e-27	6.18766e-24
SRSF2_Huh7	ATP2C1	3	3:130613434-130613619	2:4	0.161765	0.5	-0.338235	0.338235	1.96418e-05	0.000993153
SRSF2_Huh7	DDX3X	19	X:41206565-41206704	18:20	0.661765	1	-0.338235	0.338235	2.30662e-75	6.76455e-72
SRSF2_Huh7	LRRC40	5	1:70646769-70646892	4:6	0.625	0.962963	-0.337963	0.337963	6.05211e-05	0.00250572
SRSF2_Huh7	CRYZ	2	1:75196066-75196104	1:3	0.532338	0.195195	0.337143	0.337143	1.42105e-15	5.43581e-13
SRSF2_Huh7	RTKN	12	2:74655395-74655523	11:13	0.625	0.962025	-0.337025	0.337025	1.10204e-10	1.7955e-08
SRSF2_Huh7	PTPN23	3	3:47446139-47446269	2:4	0.315789	0.652778	-0.336988	0.336988	0.0001854	0.00629787
SRSF2_Huh7	MAD1L1	4	7:2265045-2265185	3:5	0.272727	0.608696	-0.335968	0.335968	0.00111691	0.0265943
SRSF2_Huh7	METTL8	11	2:172182552-172182658	10:12	0.576923	0.911111	-0.334188	0.334188	0.00020245	0.00683269
SRSF2_Huh7	CCNJ	3	10:97810013-97810223	2:4	0.545455	0.87931	-0.333856	0.333856	0.000125482	0.0046427
SRSF2_Huh7	RPUSD1	2	16:837556-837744	1:3	0.627907	0.961538	-0.333631	0.333631	0.00146291	0.0325017
SRSF2_Huh7	PLEC	39	8:144996672-145000052	38:40	0.25	0.583333	-0.333333	0.333333	0.00113349	0.0269526
SRSF2_Huh7	ACAT1	11	11:108014710-108014774	10:12	0.666667	1	-0.333333	0.333333	1.1895e-07	1.05178e-05
SRSF2_Huh7	PCBP2	15	12:53861589-53861627	14:16	0.459775	0.79013	-0.330355	0.330355	2.05451e-103	1.80756e-99
SRSF2_Huh7	FHL3	2	1:38464929-38465104	1:3	0.535211	0.864865	-0.329654	0.329654	0.000633153	0.0170612
SRSF2_Huh7	ATXN2	13	12:111948189-111948386	12:14	0.415094	0.744681	-0.329587	0.329587	0.00117255	0.0276201
SRSF2_Huh7	KIAA0284	2	14:105334761-105334892	1:3	0.642857	0.972222	-0.329365	0.329365	0.000664213	0.0176912
SRSF2_Huh7	HDAC6	22	X:48675733-48675866	21:23	0.613636	0.942029	-0.328393	0.328393	2.62186e-05	0.00126109
SRSF2_Huh7	OCRL	6	X:128691838-128691927	5:7	0.5	0.827586	-0.327586	0.327586	8.90692e-05	0.00350618
SRSF2_Huh7	FBXO22	2	15:76196832-76196970	1:3	0.311475	0.638298	-0.326822	0.326822	7.89984e-05	0.00316641
SRSF2_Huh7	ATF2	10	2:175978722-175978836	9:11	0.64539	0.969925	-0.324535	0.324535	1.35965e-12	3.10707e-10
SRSF2_Huh7	HACL1	7	3:15626755-15626849	6:8	0.652174	0.974359	-0.322185	0.322185	8.00153e-05	0.00319989
SRSF2_Huh7	CTSL1	8	9:90345296-90345413	7:9	0.643836	0.963303	-0.319467	0.319467	2.08839e-23	1.83736e-20
SRSF2_Huh7	RAPGEF1	5	9:134525516-134525629	4:6	0.168919	0.488	-0.319081	0.319081	2.39508e-08	2.52857e-06
SRSF2_Huh7	RNPEPL1	4	2:241513192-241513308	3:5	0.666667	0.983333	-0.316667	0.316667	2.87268e-05	0.00134558
SRSF2_Huh7	SKA2	3	17:57196680-57196856	2:4	0.335702	0.650735	-0.315034	0.315034	9.49177e-18	4.63937e-15
SRSF2_Huh7	DEDD2	3	19:42720832-42721197	2:4	0.146341	0.46	-0.313659	0.313659	5.88421e-06	0.000353374
SRSF2_Huh7	ATP6V1H	9	8:54723724-54723777	8:10	0.534884	0.846154	-0.31127	0.31127	0.00138475	0.031217
SRSF2_Huh7	HEATR2	15	7:819590-819781	14:16	0.569444	0.880597	-0.311153	0.311153	5.45184e-05	0.00231716
SRSF2_Huh7	AURKA	3	20:54963743-54963840	2:4	0.245902	0.556962	-0.31106	0.31106	1.18362e-05	0.000650843
SRSF2_Huh7	C13orf27	5	13:103419623-103419828	4:6	0.461538	0.77027	-0.308732	0.308732	0.00060181	0.016367
SRSF2_Huh7	ZNF410	11	14:74388769-74388909	10:12	0.176	0.483871	-0.307871	0.307871	2.19275e-05	0.00108994
SRSF2_Huh7	LARS2	21	3:45583321-45583448	20:22	0.611111	0.918919	-0.307808	0.307808	0.00225524	0.0456653
SRSF2_Huh7	LGALS8	12	1:236706215-236706340	11:13	0.798658	0.491228	0.30743	0.30743	9.4681e-12	1.89319e-09
SRSF2_Huh7	COPS7A	3	12:6837092-6837167	2:4	0.5	0.806897	-0.306897	0.306897	2.59303e-07	2.12218e-05
SRSF2_Huh7	CRYZ	8	1:75172787-75172888	7:9	0.611296	0.916168	-0.304872	0.304872	1.51714e-20	9.88727e-18
SRSF2_Huh7	CLDND1	2	3:98240497-98240547	1:3	0.402062	0.0991736	0.302888	0.302888	1.56152e-07	1.33382e-05
SRSF2_Huh7	SLC46A1	3	17:26729256-26729339	2:4	0.544304	0.846667	-0.302363	0.302363	1.28358e-06	9.29463e-05
SRSF2_Huh7	USP8	13	15:50776472-50776558	12:14	0.816901	0.515152	0.30175	0.30175	0.000238039	0.00769381
SRSF2_Huh7	C21orf59	6	21:33974582-33974677	5:7	0.658451	0.957265	-0.298814	0.298814	7.08884e-19	3.89798e-16
SRSF2_Huh7	BOD1	3	5:173036241-173036437	2:4	0.605634	0.901554	-0.295921	0.295921	1.76875e-13	4.64522e-11
SRSF2_Huh7	APITD1	3	1:10493899-10494022	2:4	0.705128	1	-0.294872	0.294872	2.05702e-06	0.000140292
SRSF2_Huh7	RP5-1113E3.5	3	1:10493899-10494022	2:4	0.705128	1	-0.294872	0.294872	2.05702e-06	0.000140292
SRSF2_Huh7	ALDH16A1	8	19:49965141-49965293	7:9	0.594595	0.888889	-0.294294	0.294294	5.71294e-05	0.00240401
SRSF2_Huh7	TCTN3	13	10:97440229-97440366	12:14	0.666667	0.958904	-0.292237	0.292237	4.08015e-05	0.00180257
SRSF2_Huh7	PRPF6	15	20:62657292-62657411	14:16	0.683258	0.975155	-0.291897	0.291897	1.08293e-14	3.66448e-12
SRSF2_Huh7	CHEK1	4	11:125497502-125497725	3:5	0.494737	0.786517	-0.29178	0.29178	5.77406e-05	0.00241905
SRSF2_Huh7	MYO19	14	17:34866585-34866756	13:15	0.708333	1	-0.291667	0.291667	9.95348e-05	0.00387481
SRSF2_Huh7	FBXO38	15	5:147806776-147807510	14:16	0.416667	0.708333	-0.291667	0.291667	0.000135385	0.0049017
SRSF2_Huh7	FIS1	3	7:100887288-100887420	2:4	0.560411	0.851541	-0.291129	0.291129	1.77487e-18	9.46383e-16
SRSF2_Huh7	C1orf106	6	1:200870065-200870287	5:7	0.636364	0.926316	-0.289952	0.289952	6.73889e-07	5.1111e-05
SRSF2_Huh7	CARM1	15	19:11032051-11032119	14:16	0.631579	0.34188	0.289699	0.289699	3.16254e-05	0.00144917
SRSF2_Huh7	LSS	20	21:47614405-47614575	19:21	0.7125	1	-0.2875	0.2875	5.55095e-14	1.5754e-11
SRSF2_Huh7	SLC2A8	3	9:130160184-130160390	2:4	0.663551	0.950355	-0.286803	0.286803	3.70777e-09	4.46863e-07
SRSF2_Huh7	ISOC2	3	19:55967003-55967212	2:4	0.206557	0.492837	-0.286279	0.286279	1.71185e-14	5.47857e-12
SRSF2_Huh7	ARID4A	14	14:58813738-58813835	13:15	0.714286	1	-0.285714	0.285714	0.000525575	0.0147307
SRSF2_Huh7	C1orf77	5	1:153615703-153615840	4:6	0.437956	0.722222	-0.284266	0.284266	3.39747e-07	2.71736e-05
SRSF2_Huh7	GGNBP2	2	17:34901468-34901666	1:3	0.676768	0.959459	-0.282692	0.282692	1.9722e-06	0.000136089
SRSF2_Huh7	GRB7	16	17:37902166-37902253	15:17	0.761194	0.478873	0.282321	0.282321	0.000842122	0.0211884
SRSF2_Huh7	AF196779.12	7	X:48935302-48935406	6:8	0.60119	0.881356	-0.280165	0.280165	1.31196e-07	1.14283e-05
SRSF2_Huh7	WDR45	9	X:48935302-48935406	8:10	0.60119	0.881356	-0.280165	0.280165	1.31196e-07	1.14283e-05
SRSF2_Huh7	NR2C2AP	3	19:19313279-19313384	2:4	0.536232	0.816327	-0.280095	0.280095	7.77141e-06	0.000449821
SRSF2_Huh7	GRIPAP1	5	X:48853662-48853769	4:6	0.720497	1	-0.279503	0.279503	1.88751e-14	5.82676e-12
SRSF2_Huh7	UBR4	96	1:19421400-19421519	95:97	0.688525	0.966667	-0.278142	0.278142	3.54124e-09	4.3272e-07
SRSF2_Huh7	REV1	6	2:100058779-100058931	5:7	0.681159	0.959184	-0.278024	0.278024	0.000142866	0.00511991
SRSF2_Huh7	SCARA3	3	8:27509025-27509144	2:4	0.722222	1	-0.277778	0.277778	0.000887173	0.022055
SRSF2_Huh7	PITPNB	10	22:28250842-28250927	9:11	0.657895	0.934911	-0.277017	0.277017	6.8398e-12	1.39946e-09
SRSF2_Huh7	RBMS2	14	12:56982716-56982802	13:15	0.548077	0.825	-0.276923	0.276923	0.00207632	0.0429822
SRSF2_Huh7	MSI2	15	17:55754348-55754420	14:16	0.811024	0.534884	0.27614	0.27614	2.69586e-06	0.000177001
SRSF2_Huh7	RALGAPB	27	20:37198531-37198639	26:28	0.725	1	-0.275	0.275	2.96068e-05	0.00136447
SRSF2_Huh7	EHMT1	8	9:140646783-140646860	7:9	0.506173	0.780822	-0.274649	0.274649	0.000438596	0.0127563
SRSF2_Huh7	AKR1A1	7	1:46034157-46034356	6:8	0.494624	0.769231	-0.274607	0.274607	2.41324e-13	6.15412e-11
SRSF2_Huh7	RFWD3	11	16:74664679-74664855	10:12	0.702703	0.97619	-0.273488	0.273488	2.77517e-08	2.87246e-06
SRSF2_Huh7	RAI14	15	5:34813679-34813765	14:16	0.883281	0.611538	0.271742	0.271742	2.60773e-14	7.6476e-12
SRSF2_Huh7	AVL9	15	7:32619831-32619884	14:16	0.651515	0.38	0.271515	0.271515	0.000825439	0.0209286
SRSF2_Huh7	CAST	13	5:96066484-96066564	12:14	0.683673	0.955102	-0.271429	0.271429	3.62402e-28	3.98552e-25
SRSF2_Huh7	HPS1	6	10:100195029-100195171	5:7	0.486486	0.757282	-0.270795	0.270795	0.000252859	0.00807498
SRSF2_Huh7	TMEM194A	6	12:57457854-57457968	5:7	0.702128	0.972222	-0.270095	0.270095	3.45239e-05	0.00157379
SRSF2_Huh7	MYD88	2	3:38181355-38181489	1:3	0.672131	0.94186	-0.269729	0.269729	2.8753e-05	0.00134558
SRSF2_Huh7	FAM40A	8	1:110583257-110583325	6:9	0.730769	1	-0.269231	0.269231	0.00218775	0.0448487
SRSF2_Huh7	BDH2	8	4:104006506-104006619	7:9	0.625	0.893617	-0.268617	0.268617	0.00191136	0.0402301
SRSF2_Huh7	SRRM2	2	16:2806335-2806607	1:3	0.516779	0.785185	-0.268407	0.268407	2.24607e-06	0.000151799
SRSF2_Huh7	CEP78	15	9:80880775-80880822	14:16	0.204082	0.472441	-0.268359	0.268359	3.99773e-05	0.00177839
SRSF2_Huh7	SMPDL3A	7	6:123127378-123127502	6:9	0.509804	0.777778	-0.267974	0.267974	0.00141448	0.0316656
SRSF2_Huh7	LAS1L	9	X:64744444-64744494	8:10	0.561905	0.294521	0.267384	0.267384	2.80148e-05	0.00132758
SRSF2_Huh7	PLA2G12B	2	10:74702410-74702498	1:3	0.541176	0.808219	-0.267043	0.267043	0.000402898	0.011935
SRSF2_Huh7	RDH11	3	14:68159155-68159310	2:4	0.706731	0.973451	-0.266721	0.266721	1.14037e-19	6.91931e-17
SRSF2_Huh7	PAM	24	5:102360835-102361042	23:25	0.31982	0.585859	-0.266039	0.266039	5.38382e-08	5.2339e-06
SRSF2_Huh7	MED13	8	17:60106902-60107012	7:9	0.682692	0.948454	-0.265761	0.265761	1.17041e-06	8.51011e-05
SRSF2_Huh7	TMEM69	2	1:46156646-46156782	1:3	0.622642	0.8875	-0.264858	0.264858	0.000478233	0.0136385
SRSF2_Huh7	SCML2	15	X:18260559-18260710	14:16	0.148515	0.412844	-0.264329	0.264329	2.92603e-05	0.00135848
SRSF2_Huh7	ATP2B1	3	12:90028774-90029028	2:4	0.735714	1	-0.264286	0.264286	1.17677e-09	1.61769e-07
SRSF2_Huh7	CEP78	3	9:80855208-80855280	2:4	0.682353	0.946154	-0.263801	0.263801	4.61123e-07	3.60619e-05
SRSF2_Huh7	MBNL2	8	13:98009050-98009103	7:9	0.154762	0.416667	-0.261905	0.261905	0.00147815	0.0327989
SRSF2_Huh7	COASY	2	17:40714335-40714505	1:3	0.339286	0.08	0.259286	0.259286	0.00174853	0.0375666
SRSF2_Huh7	RETSAT	4	2:85577163-85577364	3:5	0.740741	1	-0.259259	0.259259	0.000336133	0.0102329
SRSF2_Huh7	CASC3	13	17:38325851-38325915	12:14	0.740741	1	-0.259259	0.259259	7.05751e-06	0.000417613
SRSF2_Huh7	ATF6	2	1:161748034-161748110	1:3	0.740741	1	-0.259259	0.259259	0.000634575	0.0170734
SRSF2_Huh7	NUBP2	3	16:1836758-1836956	2:4	0.457627	0.715789	-0.258162	0.258162	0.000167997	0.0057849
SRSF2_Huh7	FAM13A	12	4:89726162-89726203	11:13	0.969231	0.711111	0.25812	0.25812	0.000138672	0.00498991
SRSF2_Huh7	BOLA3	3	2:74369399-74369487	2:4	0.535156	0.793249	-0.258093	0.258093	1.5232e-09	2.01521e-07
SRSF2_Huh7	ZDHHC20	15	13:21952800-21952877	14:16	0.466667	0.209302	0.257364	0.257364	4.09768e-05	0.00180257
SRSF2_Huh7	C5	12	9:123783787-123783972	11:13	0.675	0.931925	-0.256925	0.256925	9.15027e-32	1.46371e-28
SRSF2_Huh7	CLPTM1L	9	5:1330395-1330498	8:10	0.738462	0.992095	-0.253633	0.253633	1.47913e-15	5.53762e-13
SRSF2_Huh7	CCNDBP1	10	15:43486279-43486335	9:11	0.435294	0.181818	0.253476	0.253476	0.000471316	0.013485
SRSF2_Huh7	SLC39A14	6	8:22269550-22269719	5:7	0.867647	0.615764	0.251884	0.251884	3.0052e-10	4.44365e-08
SRSF2_Huh7	COL4A5	53	X:107938497-107938669	52:54	0.623377	0.875	-0.251623	0.251623	0.00220098	0.0449754
SRSF2_Huh7	BPNT1	2	1:220253069-220253196	1:3	0.697802	0.94898	-0.251177	0.251177	3.30182e-11	5.80989e-09
SRSF2_Huh7	C1orf43	2	1:154192312-154192413	1:3	0.741573	0.490506	0.251067	0.251067	2.62675e-11	4.68202e-09
SRSF2_Huh7	RAD54L	15	1:46739296-46739419	14:16	0.75	1	-0.25	0.25	0.000104916	0.00402201
SRSF2_Huh7	NFS1	14	20:34262967-34263947	10:15	0.75	1	-0.25	0.25	0.00122971	0.0284838
SRSF2_Huh7	MCC	9	5:112439889-112440052	8:11	0.75	1	-0.25	0.25	0.00218946	0.0448487
SRSF2_Huh7	KDM5A	28	12:395292-395373	27:29	0.541667	0.291667	0.25	0.25	0.000714154	0.0187556
SRSF2_Huh7	TMEM14C	2	6:10724723-10724866	1:3	0.715385	0.965368	-0.249983	0.249983	1.35256e-11	2.61845e-09
SRSF2_Huh7	TAF11	4	6:34847744-34847840	3:5	0.650794	0.9	-0.249206	0.249206	0.00198749	0.0415836
SRSF2_Huh7	KIAA0907	6	1:155896467-155896630	5:7	0.697368	0.944444	-0.247076	0.247076	2.21153e-05	0.00109309
SRSF2_Huh7	KIF12	5	9:116859581-116859716	4:6	0.372727	0.619048	-0.24632	0.24632	0.000378992	0.0113221
SRSF2_Huh7	HEATR3	5	16:50106516-50106625	4:6	0.754386	1	-0.245614	0.245614	2.25162e-06	0.000151799
SRSF2_Huh7	ZC3H11A	2	1:203765421-203765729	1:3	0.409449	0.165217	0.244231	0.244231	3.54664e-05	0.00161257
SRSF2_Huh7	OCRL	19	X:128718321-128718344	18:20	0.363636	0.119658	0.243978	0.243978	7.67655e-05	0.00310521
SRSF2_Huh7	GALE	4	1:24125377-24125502	3:5	0.413793	0.657534	-0.243741	0.243741	3.70065e-05	0.00167395
SRSF2_Huh7	ZCCHC4	13	4:25366644-25366788	12:14	0.75641	1	-0.24359	0.24359	4.90784e-05	0.00211663
SRSF2_Huh7	ARMC1	5	8:66517657-66517773	4:6	0.756906	1	-0.243094	0.243094	2.54886e-11	4.62369e-09
SRSF2_Huh7	AIG1	3	6:143457972-143458127	2:4	0.703704	0.946188	-0.242485	0.242485	2.63423e-11	4.68202e-09
SRSF2_Huh7	MKI67	7	10:129913192-129914271	6:8	0.777778	0.535433	0.242345	0.242345	6.45959e-05	0.00266189
SRSF2_Huh7	RP11-61P7.3	6	9:103206410-103207519	5:7	0.351648	0.109589	0.242059	0.242059	0.000421105	0.0123496
SRSF2_Huh7	C9orf30	5	9:103206410-103207519	4:6	0.351648	0.109589	0.242059	0.242059	0.000421105	0.0123496
SRSF2_Huh7	OPA1	5	3:193335573-193335626	4:6	0.364865	0.123077	0.241788	0.241788	0.00151094	0.0334422
SRSF2_Huh7	C22orf13	3	22:24944885-24944969	2:4	0.758621	1	-0.241379	0.241379	9.32447e-06	0.000525876
SRSF2_Huh7	INTS3	20	1:153736594-153736697	19:21	0.759259	1	-0.240741	0.240741	0.000215877	0.00711344
SRSF2_Huh7	KIAA1524	4	3:108301824-108301930	3:5	0.76	1	-0.24	0.24	1.55072e-07	1.33105e-05
SRSF2_Huh7	STK17A	5	7:43663171-43663219	4:6	0.721154	0.959596	-0.238442	0.238442	2.00188e-14	6.07329e-12
SRSF2_Huh7	ESPL1	7	12:53668601-53668794	6:8	0.761905	1	-0.238095	0.238095	0.00210703	0.043447
SRSF2_Huh7	WWP1	2	8:87381168-87381260	1:3	0.640625	0.878049	-0.237424	0.237424	0.00119136	0.0279508
SRSF2_Huh7	UBA3	4	3:69124581-69124661	3:5	0.7375	0.974684	-0.237184	0.237184	1.87759e-05	0.000957626
SRSF2_Huh7	KIF4A	26	X:69624565-69624672	25:27	0.764045	1	-0.235955	0.235955	4.23777e-12	8.98407e-10
SRSF2_Huh7	FAM118B	5	11:126110687-126110939	4:6	0.764706	1	-0.235294	0.235294	0.000774355	0.0199324
SRSF2_Huh7	MRPL18	2	6:160211700-160211819	1:3	0.395189	0.62987	-0.234681	0.234681	2.60578e-06	0.00017183
SRSF2_Huh7	TMEM168	2	7:112428509-112428599	1:3	0.365079	0.130952	0.234127	0.234127	0.00136113	0.0307451
SRSF2_Huh7	MAMLD1	7	X:149641952-149642074	6:8	1	0.767123	0.232877	0.232877	0.00116391	0.0275115
SRSF2_Huh7	NASP	7	1:46072993-46074009	6:8	0.461722	0.22956	0.232163	0.232163	6.05644e-11	1.03465e-08
SRSF2_Huh7	GOLIM4	7	3:167758574-167758657	6:8	0.623377	0.855263	-0.231887	0.231887	0.00158403	0.0346243
SRSF2_Huh7	DMD	85	X:31144759-31144790	84:86	0.231884	0	0.231884	0.231884	3.12881e-06	0.000203153
SRSF2_Huh7	PIK3CB	12	3:138413628-138413749	11:13	0.75	0.981818	-0.231818	0.231818	0.000332555	0.0101415
SRSF2_Huh7	C5orf33	11	5:36208727-36208792	10:12	0.0909091	0.322344	-0.231435	0.231435	1.89091e-11	3.53962e-09
SRSF2_Huh7	C9orf5	5	9:111853202-111853435	4:6	0.608108	0.838983	-0.230875	0.230875	0.000534391	0.014896
SRSF2_Huh7	EIF4A2	11	3:186506099-186506205	10:12	0.397222	0.166352	0.230871	0.230871	2.17259e-14	6.47949e-12
SRSF2_Huh7	PDHA1	7	X:19372609-19372701	6:8	0.693837	0.923395	-0.229558	0.229558	8.97416e-21	6.07344e-18
SRSF2_Huh7	BMF	5	15:40396381-40396541	4:6	0.68	0.909091	-0.229091	0.229091	8.4405e-05	0.00335258
SRSF2_Huh7	SEC24C	2	10:75506388-75506474	1:3	0.0921053	0.320988	-0.228882	0.228882	0.000414124	0.0122264
SRSF2_Huh7	NEDD4L	18	18:56002710-56002769	17:19	0.0505051	0.278846	-0.228341	0.228341	9.23111e-06	0.000522285
SRSF2_Huh7	EHMT1	12	9:140669561-140669704	11:13	0.727273	0.954545	-0.227273	0.227273	0.000189026	0.00640866
SRSF2_Huh7	IL4R	10	16:27367129-27367228	8:11	0.773585	1	-0.226415	0.226415	0.000246174	0.00790454
SRSF2_Huh7	GAS8	8	16:90102041-90102095	7:9	0.984127	0.758065	0.226062	0.226062	0.000104333	0.00400837
SRSF2_Huh7	FAM102A	2	9:130716084-130716204	1:3	0.774194	1	-0.225806	0.225806	0.00109347	0.0260713
SRSF2_Huh7	HMG20A	2	15:77740061-77740153	1:3	0.225806	0	0.225806	0.225806	5.3465e-05	0.00227789
SRSF2_Huh7	U2AF1	4	21:44520563-44520629	3:5	0.437601	0.662791	-0.225189	0.225189	5.96141e-13	1.39863e-10
SRSF2_Huh7	PRMT7	13	16:68381114-68381197	12:14	0.775862	1	-0.224138	0.224138	1.72407e-06	0.000120384
SRSF2_Huh7	MED16	4	19:889638-889807	3:5	0.75	0.973451	-0.223451	0.223451	1.11645e-05	0.000617771
SRSF2_Huh7	SLC35F5	15	2:114475330-114475427	14:16	0.723404	0.945946	-0.222542	0.222542	1.24053e-05	0.000675799
SRSF2_Huh7	HIBCH	13	2:191073606-191073639	12:14	0.975309	0.752941	0.222367	0.222367	2.25011e-05	0.00110905
SRSF2_Huh7	PKN2	10	1:89270074-89270217	9:11	0.753247	0.975309	-0.222062	0.222062	2.96219e-05	0.00136447
SRSF2_Huh7	ENOPH1	3	4:83372196-83372398	2:4	0.716418	0.937931	-0.221513	0.221513	7.4503e-07	5.60237e-05
SRSF2_Huh7	AAAS	6	12:53708535-53708633	5:7	0.727273	0.948718	-0.221445	0.221445	2.7461e-06	0.00017963
SRSF2_Huh7	RCC1	7	1:28857035-28857127	6:8	0.037037	0.257143	-0.220106	0.220106	1.2896e-07	1.13459e-05
SRSF2_Huh7	WDR34	5	9:131397937-131398046	4:6	0.712264	0.93133	-0.219066	0.219066	6.52128e-10	9.32914e-08
SRSF2_Huh7	GOLGA1	12	9:127670656-127670751	11:13	0.78125	1	-0.21875	0.21875	0.00127403	0.029266
SRSF2_Huh7	ARHGEF11	33	1:156913727-156913894	32:34	0.78125	1	-0.21875	0.21875	0.00127403	0.029266
SRSF2_Huh7	MRPL9	5	1:151733927-151734028	4:6	0.545946	0.763636	-0.21769	0.21769	2.01731e-05	0.0010113
SRSF2_Huh7	VEZT	18	12:95692638-95692719	17:19	0.406667	0.190184	0.216483	0.216483	3.64882e-05	0.00165476
SRSF2_Huh7	F2	12	11:46750930-46751115	11:13	0.629213	0.845528	-0.216315	0.216315	0.000370597	0.0110902
SRSF2_Huh7	PIGG	11	4:515797-516626	10:12	0.216216	0	0.216216	0.216216	5.26668e-05	0.00224933
SRSF2_Huh7	SLC3A2	2	11:62638217-62638309	1:3	0.441667	0.657143	-0.215476	0.215476	0.000691336	0.018238
SRSF2_Huh7	SMG1	47	16:18849336-18849554	46:48	0.785714	1	-0.214286	0.214286	7.6616e-06	0.000446402
SRSF2_Huh7	RPS6KB1	13	17:58013576-58013638	12:14	0.741176	0.954955	-0.213778	0.213778	1.8169e-05	0.000932076
SRSF2_Huh7	TAB3	12	X:30852168-30852269	11:13	0.645455	0.859091	-0.213636	0.213636	2.74272e-07	2.224e-05
SRSF2_Huh7	TMEM45B	4	11:129724505-129724711	3:5	0.769231	0.980583	-0.211352	0.211352	2.92603e-06	0.00019069
SRSF2_Huh7	INTS7	19	1:212119949-212120047	18:20	0.777778	0.989011	-0.211233	0.211233	1.40221e-06	0.000100298
SRSF2_Huh7	BCAT2	5	19:49309774-49309974	4:6	0.650485	0.861538	-0.211053	0.211053	0.000172295	0.00591115
SRSF2_Huh7	OS9	13	12:58113882-58114046	12:14	0.341509	0.552448	-0.210938	0.210938	1.85581e-12	4.13353e-10
SRSF2_Huh7	FLNB	33	3:58127585-58127656	32:34	0.965957	0.75502	0.210937	0.210937	4.21704e-12	8.98407e-10
SRSF2_Huh7	SLC19A2	2	1:169446393-169446995	1:3	0.763158	0.973684	-0.210526	0.210526	0.000779709	0.0199997
SRSF2_Huh7	GPBP1	8	5:56532940-56532999	7:9	0.401408	0.191011	0.210397	0.210397	0.000851322	0.0213693
SRSF2_Huh7	INPPL1	7	11:71940707-71940796	6:8	0.777778	0.987654	-0.209877	0.209877	2.93646e-05	0.00135974
SRSF2_Huh7	KIAA0494	7	1:47154025-47154216	6:8	0.141414	0.351145	-0.209731	0.209731	0.000429656	0.0125377
SRSF2_Huh7	PIN4	2	X:71406311-71406384	1:3	0.615	0.82449	-0.20949	0.20949	1.0835e-06	7.94387e-05
SRSF2_Huh7	DTL	14	1:212273594-212274426	13:15	0.832117	0.623077	0.20904	0.20904	0.000172336	0.00591115
SRSF2_Huh7	QKI	2	6:163876311-163876453	1:3	0.736148	0.944954	-0.208806	0.208806	1.28776e-14	4.27536e-12
SRSF2_Huh7	UBAP1	5	9:34220906-34220946	1:6	0.981132	0.772727	0.208405	0.208405	0.00216551	0.0444624
SRSF2_Huh7	RACGAP1	6	12:50400217-50400419	5:7	0.72093	0.929245	-0.208315	0.208315	5.94567e-08	5.68587e-06
SRSF2_Huh7	C8orf38	10	8:96046236-96046350	9:11	0.05	0.258065	-0.208065	0.208065	0.00210161	0.0434037
SRSF2_Huh7	SSFA2	16	2:182785324-182785389	15:17	0.631579	0.839623	-0.208044	0.208044	0.00113989	0.0270682
SRSF2_Huh7	PGLS	4	19:17628519-17628659	3:5	0.735099	0.943128	-0.208029	0.208029	3.51694e-08	3.59791e-06
SRSF2_Huh7	PPP2R3C	2	14:35585816-35585943	1:3	0.96875	0.76087	0.20788	0.20788	0.00160753	0.0350509
SRSF2_Huh7	HABP2	7	10:115337785-115337904	6:8	0.715385	0.92268	-0.207296	0.207296	9.66067e-07	7.1424e-05
SRSF2_Huh7	APBB1	3	11:6431857-6432591	2:9	0.771429	0.978723	-0.207295	0.207295	0.00121299	0.0282699
SRSF2_Huh7	GAR1	2	4:110737309-110737534	1:3	0.711712	0.918919	-0.207207	0.207207	0.00068172	0.0180928
SRSF2_Huh7	CCDC52	16	3:113169183-113169363	15:17	0.793103	1	-0.206897	0.206897	0.00200351	0.0418691
SRSF2_Huh7	LSS	22	21:47610980-47611149	21:23	0.770833	0.975806	-0.204973	0.204973	5.72448e-05	0.00240401
SRSF2_Huh7	AP001468.1	2	21:47610990-47611149	1:3	0.770833	0.975806	-0.204973	0.204973	5.72448e-05	0.00240401
SRSF2_Huh7	SFRS4	11	1:29476615-29476704	10:12	0.747312	0.951807	-0.204495	0.204495	5.22898e-08	5.14017e-06
SRSF2_Huh7	PPP6R3	2	11:68272613-68272739	1:3	0.666667	0.462264	0.204403	0.204403	0.00128438	0.0294655
SRSF2_Huh7	CRBN	8	3:3195644-3195759	7:9	0.795918	1	-0.204082	0.204082	1.40461e-05	0.000748956
SRSF2_Huh7	PRKAR2A	10	3:48789609-48789750	9:11	0.666667	0.870588	-0.203922	0.203922	0.00240686	0.0481811
SRSF2_Huh7	NF1	31	17:29576973-29579821	30:32	0	0.203704	-0.203704	0.203704	0.000626004	0.0169204
SRSF2_Huh7	PTAR1	2	9:72365697-72365866	1:3	0.613636	0.815789	-0.202153	0.202153	0.000689116	0.0182067
SRSF2_Huh7	PAPD4	12	5:78944885-78945013	11:13	0.741176	0.941176	-0.2	0.2	0.00100199	0.0243522
SRSF2_Huh7	BCL2L12	6	19:50173473-50173745	5:7	0.674074	0.871245	-0.197171	0.197171	1.71904e-07	1.46127e-05
SRSF2_Huh7	ZNF207	10	17:30693684-30693776	9:11	0.113208	0.310263	-0.197055	0.197055	2.14396e-12	4.71563e-10
SRSF2_Huh7	CD164	6	6:109691614-109691670	5:7	0.951807	0.754808	0.197	0.197	2.34237e-23	1.96268e-20
SRSF2_Huh7	TTC33	4	5:40728447-40728578	3:5	0.790909	0.987805	-0.196896	0.196896	1.29064e-05	0.000698774
SRSF2_Huh7	SCAMP4	5	19:1918888-1919101	4:9	0.767442	0.963855	-0.196414	0.196414	3.54144e-07	2.81969e-05
SRSF2_Huh7	BPNT1	7	1:220239415-220239459	6:8	0.231481	0.0357143	0.195767	0.195767	2.43926e-07	2.00567e-05
SRSF2_Huh7	SLC35A3	9	1:100483238-100483371	8:10	0.804598	1	-0.195402	0.195402	8.05775e-06	0.000463347
SRSF2_Huh7	DHDDS	6	1:26774050-26774151	5:7	0.611111	0.806122	-0.195011	0.195011	0.00232796	0.0468146
SRSF2_Huh7	TSPAN17	8	5:176083896-176083957	7:9	0.771429	0.965909	-0.194481	0.194481	0.000101456	0.00393218
SRSF2_Huh7	FAM48A	19	13:37599457-37599574	18:20	0.776471	0.970588	-0.194118	0.194118	0.000603007	0.0163742
SRSF2_Huh7	SLC44A3	18	1:95357837-95358073	17:19	0.755556	0.94964	-0.194085	0.194085	2.55963e-05	0.00123734
SRSF2_Huh7	TCTN3	5	10:97447004-97447112	4:6	0.806452	1	-0.193548	0.193548	4.80748e-06	0.000297861
SRSF2_Huh7	HDAC1	7	1:32794669-32794761	6:8	0.727477	0.920152	-0.192675	0.192675	1.3099e-10	2.09536e-08
SRSF2_Huh7	ARRB2	2	17:4618308-4618338	1:3	0.730088	0.537879	0.19221	0.19221	0.000319419	0.00982604
SRSF2_Huh7	AIG1	8	6:143656178-143656667	7:9	0.29697	0.105	0.19197	0.19197	4.22378e-06	0.000265434
SRSF2_Huh7	MPRIP	24	17:17083921-17083983	23:25	0.554688	0.745902	-0.191214	0.191214	0.00222593	0.0451759
SRSF2_Huh7	SFRS2IP	17	12:46316719-46316937	16:18	0.768421	0.95935	-0.190929	0.190929	3.87175e-05	0.00173352
SRSF2_Huh7	HMGCS1	4	5:43298111-43298236	3:5	0.77533	0.964507	-0.189177	0.189177	3.32306e-85	1.46181e-81
SRSF2_Huh7	AMFR	9	16:56423097-56423287	8:10	0.8	0.988506	-0.188506	0.188506	2.68936e-05	0.00128943
SRSF2_Huh7	ACP1	3	2:272037-272150	2:4	0.773852	0.585657	0.188194	0.188194	4.25054e-06	0.000266166
SRSF2_Huh7	IRF1	9	5:131820054-131820189	8:10	0.8125	1	-0.1875	0.1875	8.31471e-06	0.000475018
SRSF2_Huh7	CDK2	5	12:56363259-56363360	4:6	0.695238	0.882682	-0.187443	0.187443	0.000135833	0.00490783
SRSF2_Huh7	BRD8	3	5:137507754-137507823	2:4	0.794702	0.981818	-0.187116	0.187116	2.08748e-06	0.00014182
SRSF2_Huh7	PUM2	14	2:20478344-20478580	13:15	0.863158	0.676056	0.187102	0.187102	0.00119709	0.0280479
SRSF2_Huh7	POP5	3	12:121017577-121017726	2:4	0.980198	0.793103	0.187095	0.187095	0.000115059	0.00433529
SRSF2_Huh7	TPD52L2	4	20:62507169-62507228	3:5	0.309524	0.495614	-0.18609	0.18609	3.83317e-05	0.00172063
SRSF2_Huh7	ASPH	13	8:62556504-62556560	12:14	0.878788	0.69379	0.184998	0.184998	1.24106e-10	2.00346e-08
SRSF2_Huh7	TM9SF1	4	14:24661377-24661562	3:5	0.714286	0.89916	-0.184874	0.184874	0.00215654	0.0443819
SRSF2_Huh7	SURF4	9	9:136231716-136231902	8:10	0.790295	0.975163	-0.184869	0.184869	3.06809e-29	3.59907e-26
SRSF2_Huh7	RPA2	5	1:28224144-28224218	4:6	0.797468	0.982249	-0.18478	0.18478	2.85012e-08	2.93279e-06
SRSF2_Huh7	TMEM50A	3	1:25669452-25669564	2:4	0.760656	0.945238	-0.184582	0.184582	4.884e-13	1.17725e-10
SRSF2_Huh7	SMC5	19	9:72961495-72961565	18:20	0.521127	0.336788	0.184339	0.184339	0.000782324	0.0200375
SRSF2_Huh7	CDK5RAP1	6	20:31975129-31975339	5:7	0.697674	0.881818	-0.184144	0.184144	0.00196115	0.0411795
SRSF2_Huh7	MBOAT7	4	19:54691043-54691169	3:5	0.736264	0.92	-0.183736	0.183736	0.000160087	0.00558908
SRSF2_Huh7	ENAH	6	1:225704898-225705008	5:7	0.633766	0.817391	-0.183625	0.183625	2.76073e-08	2.87246e-06
SRSF2_Huh7	COMMD4	7	15:75632043-75632219	6:8	0.719745	0.902597	-0.182852	0.182852	4.12794e-05	0.00181135
SRSF2_Huh7	CPSF6	6	12:69651815-69651925	5:7	0.29932	0.117117	0.182203	0.182203	2.0355e-05	0.00101752
SRSF2_Huh7	AC090699.1	2	17:74555027-74555125	1:3	0.277108	0.459119	-0.182011	0.182011	9.73589e-05	0.00379851
SRSF2_Huh7	HIATL1	6	9:97207246-97207464	5:7	0.818182	1	-0.181818	0.181818	1.07555e-10	1.76872e-08
SRSF2_Huh7	NOC3L	7	10:96112653-96112814	6:8	0.818182	1	-0.181818	0.181818	3.99958e-05	0.00177839
SRSF2_Huh7	ANAPC7	4	12:110826317-110826428	3:5	0.735632	0.917431	-0.181799	0.181799	0.000814225	0.0207039
SRSF2_Huh7	DNAJC19	3	3:180705966-180706017	1:4	0.766082	0.94702	-0.180938	0.180938	3.35013e-06	0.00021593
SRSF2_Huh7	POLB	2	8:42196530-42196587	1:3	0.452632	0.272277	0.180354	0.180354	0.000225811	0.00737176
SRSF2_Huh7	NCAPG	7	4:17819562-17819711	6:8	0.820513	1	-0.179487	0.179487	2.76279e-08	2.87246e-06
SRSF2_Huh7	PATL1	7	11:59423429-59423518	6:8	0.769231	0.590361	0.178869	0.178869	0.000298315	0.00934012
SRSF2_Huh7	AIP	3	11:67256738-67256926	2:4	0.778523	0.955729	-0.177206	0.177206	1.77322e-14	5.57171e-12
SRSF2_Huh7	PAM16	2	16:4393208-4393292	1:3	0.809756	0.986842	-0.177086	0.177086	7.50216e-11	1.25261e-08
SRSF2_Huh7	PARL	6	3:183560086-183560235	5:7	0.530864	0.707143	-0.176279	0.176279	0.00204817	0.0426
SRSF2_Huh7	SMC4	2	3:160118416-160118757	1:3	0.785714	0.961832	-0.176118	0.176118	1.5787e-05	0.000834199
SRSF2_Huh7	QSOX1	4	1:180145066-180145168	3:5	0.824074	1	-0.175926	0.175926	2.75116e-09	3.38527e-07
SRSF2_Huh7	VEZT	9	12:95656682-95656857	8:10	0.774194	0.95	-0.175806	0.175806	5.0692e-05	0.00217026
SRSF2_Huh7	ATF2	6	2:175986172-175986268	5:7	0.428571	0.604027	-0.175455	0.175455	0.00233238	0.04685
SRSF2_Huh7	ENTPD5	14	14:74439587-74439727	13:15	0.825	1	-0.175	0.175	1.14153e-05	0.000629665
SRSF2_Huh7	CXorf38	5	X:40495785-40495964	4:6	0.825397	1	-0.174603	0.174603	0.0022197	0.0451014
SRSF2_Huh7	RHOU	2	1:228873420-228873478	1:3	0.718354	0.892857	-0.174503	0.174503	1.61783e-06	0.000113869
SRSF2_Huh7	IBTK	16	6:82920531-82920627	15:17	0.825581	1	-0.174419	0.174419	0.000129988	0.00473556
SRSF2_Huh7	SCD	5	10:102116289-102116521	4:6	0.803051	0.977202	-0.174151	0.174151	9.28506e-91	5.44599e-87
SRSF2_Huh7	ACAA1	11	3:38167653-38167832	10:12	0.709797	0.882629	-0.172832	0.172832	3.56844e-11	6.21685e-09
SRSF2_Huh7	SCN9A	27	2:167060465-167060735	26:28	0.846626	0.675	0.171626	0.171626	0.000384772	0.0114559
SRSF2_Huh7	EEF1D	6	8:144668389-144668460	5:7	0.571429	0.743025	-0.171596	0.171596	2.30342e-13	5.96044e-11
SRSF2_Huh7	ITPA	3	20:3193904-3194029	2:4	0.786008	0.957082	-0.171073	0.171073	1.72242e-08	1.87084e-06
SRSF2_Huh7	QSOX1	2	1:180135626-180135726	1:3	0.83	1	-0.17	0.17	1.10136e-08	1.23437e-06
SRSF2_Huh7	FASTK	9	7:150774000-150774114	8:10	0.772152	0.941799	-0.169647	0.169647	5.76998e-06	0.0003477
SRSF2_Huh7	PCBP4	9	3:51993911-51994039	8:10	0.802632	0.971963	-0.169331	0.169331	0.000213765	0.00708661
SRSF2_Huh7	PLOD3	18	7:100850859-100851005	17:19	0.808917	0.978022	-0.169105	0.169105	5.33598e-14	1.53921e-11
SRSF2_Huh7	CDCA3	5	12:6958487-6958593	4:6	0.938356	0.769784	0.168572	0.168572	7.00984e-05	0.00286184
SRSF2_Huh7	MAOB	15	X:43634422-43634519	14:16	0.8	0.968553	-0.168553	0.168553	1.42011e-09	1.89305e-07
SRSF2_Huh7	ATP5SL	4	19:41942283-41942377	3:5	0.515556	0.683616	-0.16806	0.16806	0.000747718	0.0194628
SRSF2_Huh7	SPATS2L	11	2:201303845-201304051	10:12	0.456522	0.290557	0.165965	0.165965	9.90132e-08	9.02713e-06
SRSF2_Huh7	CSDA	6	12:10862507-10862713	5:7	0.545073	0.710674	-0.165601	0.165601	1.31514e-06	9.48408e-05
SRSF2_Huh7	NID2	13	14:52493919-52494062	12:14	0.482036	0.647059	-0.165023	0.165023	0.000245701	0.00790375
SRSF2_Huh7	PK4P	4	2:159433783-159433895	3:5	0.75817	0.923077	-0.164907	0.164907	7.76515e-05	0.00313384
SRSF2_Huh7	DAB2	10	5:39382720-39383373	9:11	0.717833	0.882353	-0.16452	0.16452	2.25859e-08	2.40861e-06
SRSF2_Huh7	RABL5	4	7:100961405-100961494	3:5	0.742331	0.906542	-0.164211	0.164211	0.000820098	0.0208232
SRSF2_Huh7	ZMIZ1	4	10:80921810-80921890	3:5	0.792	0.955696	-0.163696	0.163696	2.37695e-05	0.00116504
SRSF2_Huh7	CRBN	10	3:3194140-3194271	9:11	0.824742	0.988372	-0.16363	0.16363	0.000109504	0.00415267
SRSF2_Huh7	RFXANK	5	19:19307995-19308060	4:6	0.678344	0.840909	-0.162565	0.162565	7.43688e-06	0.000434748
SRSF2_Huh7	UBA5	5	3:132384828-132384917	4:6	0.826087	0.988636	-0.162549	0.162549	0.000152911	0.00543559
SRSF2_Huh7	ATP2C1	20	3:130698093-130698263	19:21	0.708029	0.869919	-0.16189	0.16189	0.0015326	0.0337704
SRSF2_Huh7	RPUSD3	2	3:9885149-9885285	1:3	0.806723	0.968421	-0.161698	0.161698	0.0002383	0.00769381
SRSF2_Huh7	MRPL22	3	5:154330381-154330498	2:4	0.953731	0.792308	0.161424	0.161424	9.54292e-16	3.73149e-13
SRSF2_Huh7	C16orf88	3	16:19722694-19722762	2:4	0.739726	0.900901	-0.161175	0.161175	0.00122163	0.0283853
SRSF2_Huh7	ZC3H7A	7	16:11870176-11870214	6:8	0.839286	1	-0.160714	0.160714	0.000362699	0.0109469
SRSF2_Huh7	DNAJC13	51	3:132242384-132242557	50:52	0.839506	1	-0.160494	0.160494	0.000211136	0.00703627
SRSF2_Huh7	ACOT8	2	20:44483798-44483931	1:3	0.84	1	-0.16	0.16	0.000303025	0.00943074
SRSF2_Huh7	PTPN11	6	12:112893754-112893867	5:7	0.816667	0.976608	-0.159942	0.159942	1.05409e-07	9.49988e-06
SRSF2_Huh7	GTF3C1	36	16:27473615-27473807	35:37	0.802632	0.9625	-0.159868	0.159868	0.00210865	0.043447
SRSF2_Huh7	UCHL1	5	4:41263893-41263940	4:6	0.802913	0.962617	-0.159703	0.159703	2.843e-29	3.57324e-26
SRSF2_Huh7	CLASP2	45	3:33543144-33546942	43:46	0.744444	0.90411	-0.159665	0.159665	0.00155072	0.0340231
SRSF2_Huh7	RRM1	15	11:4148265-4148486	14:16	0.79602	0.955466	-0.159446	0.159446	1.76787e-07	1.49555e-05
SRSF2_Huh7	KIAA0090	13	1:19561624-19561746	12:14	0.84058	1	-0.15942	0.15942	0.000771422	0.0199032
SRSF2_Huh7	FLNA	30	X:153585619-153585642	29:31	0.663537	0.504409	0.159128	0.159128	2.39981e-08	2.52857e-06
SRSF2_Huh7	KTN1	36	14:56130673-56130759	35:37	0.619048	0.460432	0.158616	0.158616	0.000686075	0.0181536
SRSF2_Huh7	RNH1	3	11:504824-504996	2:4	0.797619	0.639241	0.158379	0.158379	0.000525737	0.0147307
SRSF2_Huh7	ITGB1BP1	7	2:9547578-9547727	6:8	0.727273	0.884615	-0.157343	0.157343	0.00209309	0.0432786
SRSF2_Huh7	DPH3	2	3:16305662-16305736	1:3	0.270833	0.427948	-0.157114	0.157114	5.67771e-05	0.00240156
SRSF2_Huh7	PANK3	4	5:167990894-167991070	3:5	0.83432	0.990632	-0.156313	0.156313	5.7393e-17	2.58945e-14
SRSF2_Huh7	CRYZ	5	1:75184893-75185056	4:6	0.830065	0.986188	-0.156122	0.156122	6.05043e-14	1.6899e-11
SRSF2_Huh7	SC4MOL	2	4:166254492-166254777	1:3	0.8	0.955923	-0.155923	0.155923	2.46749e-09	3.1236e-07
SRSF2_Huh7	LOXL4	10	10:100015334-100015496	9:11	0.833333	0.987952	-0.154618	0.154618	0.000231164	0.00753252
SRSF2_Huh7	ENAH	12	1:225692693-225692755	11:13	0.848851	0.694656	0.154195	0.154195	1.52375e-12	3.43742e-10
SRSF2_Huh7	NUB1	15	7:151065821-151065973	14:16	0.803922	0.957895	-0.153973	0.153973	0.000915034	0.0226311
SRSF2_Huh7	CNNM1	12	10:101150063-101150164	11:13	0.846154	1	-0.153846	0.153846	0.000269507	0.00854459
SRSF2_Huh7	UBE2K	6	4:39779302-39779430	5:7	0.770492	0.923858	-0.153366	0.153366	1.2499e-05	0.000678801
SRSF2_Huh7	NAP1L4	16	11:2970457-2970494	15:17	0.335347	0.182065	0.153282	0.153282	3.75992e-06	0.000238843
SRSF2_Huh7	C22orf13	6	22:24939810-24940051	5:7	0.748148	0.900826	-0.152678	0.152678	0.00178101	0.0382178
SRSF2_Huh7	POLDIP3	3	22:42997976-42998113	2:4	0.821429	0.669014	0.152414	0.152414	0.00236759	0.0475031
SRSF2_Huh7	MYBL2	3	20:42310424-42310495	2:4	0.720379	0.872549	-0.15217	0.15217	4.81995e-08	4.76471e-06
SRSF2_Huh7	PRKAA1	4	5:40775030-40775074	3:5	0.292683	0.140984	0.151699	0.151699	2.04042e-06	0.000140247
SRSF2_Huh7	ACP1	4	2:272192-272305	3:5	0.187302	0.338583	-0.151281	0.151281	4.57005e-05	0.00198554
SRSF2_Huh7	C22orf39	8	22:19394707-19394797	7:9	0.851351	1	-0.148649	0.148649	0.000155499	0.00549431
SRSF2_Huh7	HIRA	7	22:19394707-19394797	6:8	0.851351	1	-0.148649	0.148649	0.000155499	0.00549431
SRSF2_Huh7	ADD3	16	10:111892063-111892158	15:17	0.287671	0.43617	-0.148499	0.148499	0.000254341	0.0081076
SRSF2_Huh7	PRPF40A	9	2:153535570-153535623	8:10	0.804805	0.656463	0.148342	0.148342	2.91089e-05	0.00135848
SRSF2_Huh7	ARHGEF10L	28	1:17990942-17991090	27:29	0.851852	1	-0.148148	0.148148	0.00123826	0.0285827
SRSF2_Huh7	FBLN1	7	22:45928943-45929044	6:8	0.84507	0.993174	-0.148104	0.148104	1.99776e-11	3.70028e-09
SRSF2_Huh7	EIF4H	5	7:73604577-73604636	4:6	0.591743	0.443794	0.147949	0.147949	1.39579e-08	1.53502e-06
SRSF2_Huh7	C1orf43	4	1:154185825-154186422	3:5	0.893827	0.746032	0.147795	0.147795	6.88766e-08	6.41245e-06
SRSF2_Huh7	TOP3A	18	17:18180989-18181671	17:19	0.852459	1	-0.147541	0.147541	0.000637283	0.01712
SRSF2_Huh7	TOP3A	6	17:18205894-18206037	5:7	0.853659	1	-0.146341	0.146341	0.00129117	0.0295826
SRSF2_Huh7	C11orf67	2	11:77552065-77552106	1:3	0.152542	0.298851	-0.146308	0.146308	0.00131808	0.0300109
SRSF2_Huh7	PABPC4	11	1:40029508-40029594	10:12	0.776978	0.921811	-0.144832	0.144832	5.31466e-06	0.000324711
SRSF2_Huh7	ITGAV	30	2:187541540-187541662	29:31	0.845395	0.989796	-0.144401	0.144401	8.74194e-12	1.76808e-09
SRSF2_Huh7	UBP1	8	3:33450182-33450289	7:9	0.133159	0.277108	-0.143949	0.143949	1.09181e-05	0.000606039
SRSF2_Huh7	NSFL1C	5	20:1434854-1434950	4:6	0.831197	0.97479	-0.143593	0.143593	8.5093e-15	2.99459e-12
SRSF2_Huh7	CRIM1	13	2:36749235-36749456	12:14	0.82996	0.972973	-0.143013	0.143013	2.62556e-09	3.27655e-07
SRSF2_Huh7	TMEM161A	2	19:19245593-19245696	1:3	0.80916	0.95098	-0.14182	0.14182	0.00134733	0.0305511
SRSF2_Huh7	ZNF207	7	17:30688487-30688534	6:8	0.703911	0.845361	-0.14145	0.14145	4.09353e-06	0.000258171
SRSF2_Huh7	CCDC25	5	8:27614236-27614287	4:6	0.97037	0.828947	0.141423	0.141423	0.0008339	0.0210823
SRSF2_Huh7	AMBP	10	9:116823205-116823378	9:11	0.769674	0.910783	-0.141109	0.141109	5.92658e-64	1.48977e-60
SRSF2_Huh7	EXOSC2	4	9:133573549-133573638	3:5	0.762136	0.903226	-0.14109	0.14109	0.00122278	0.0283853
SRSF2_Huh7	HERPUD1	5	16:56973149-56973271	4:6	0.86087	1	-0.13913	0.13913	1.39378e-06	0.000100102
SRSF2_Huh7	RC3H2	8	9:125642034-125642152	7:9	0.849057	0.987805	-0.138748	0.138748	0.00246713	0.0492754
SRSF2_Huh7	C8orf59	2	8:86131465-86131592	1:3	0.0629771	0.200599	-0.137622	0.137622	1.74137e-09	2.25303e-07
SRSF2_Huh7	WHSC1	13	4:1940178-1940259	12:14	0.780142	0.917197	-0.137056	0.137056	0.000992785	0.0241953
SRSF2_Huh7	SEC11A	2	15:85257962-85258097	1:3	0.217172	0.0803571	0.136815	0.136815	7.69954e-10	1.09259e-07
SRSF2_Huh7	CNOT10	15	3:32778902-32778982	14:16	0.988372	0.851852	0.13652	0.13652	0.000937686	0.0230801
SRSF2_Huh7	LSM14A	10	19:34717313-34717369	9:11	0.531365	0.394984	0.136381	0.136381	0.00120337	0.0281217
SRSF2_Huh7	PPL	3	16:4960851-4960950	2:4	0.863636	1	-0.136364	0.136364	6.03211e-05	0.00250333
SRSF2_Huh7	PPP2R4	6	9:131890243-131890347	5:7	0.101124	0.237037	-0.135913	0.135913	2.9251e-05	0.00135848
SRSF2_Huh7	PRDX5	3	11:64087206-64087340	1:4	0.789981	0.92511	-0.135129	0.135129	4.18544e-13	1.02288e-10
SRSF2_Huh7	LSS	6	21:47639390-47639486	5:7	0.828125	0.961326	-0.133201	0.133201	0.00120598	0.0281437
SRSF2_Huh7	SREBF1	9	17:17720862-17720905	8:10	0.212389	0.079602	0.132787	0.132787	0.000224812	0.00735277
SRSF2_Huh7	APLP2	15	11:130007151-130007186	14:16	0.198939	0.0665994	0.13234	0.13234	1.63401e-16	6.84571e-14
SRSF2_Huh7	ATP6AP2	4	X:40456501-40456596	3:5	0.853261	0.985577	-0.132316	0.132316	4.30007e-07	3.39301e-05
SRSF2_Huh7	SUN1	8	7:882978-883157	7:9	0.868132	1	-0.131868	0.131868	4.29863e-05	0.00188156
SRSF2_Huh7	TNFAIP2	2	14:103593342-103593966	1:3	0.834951	0.966102	-0.13115	0.13115	0.00102614	0.0248361
SRSF2_Huh7	TBX2	6	17:59482563-59483197	5:7	0.868852	1	-0.131148	0.131148	0.00193201	0.0406161
SRSF2_Huh7	FBL	2	19:40331257-40331427	1:3	0.847584	0.976852	-0.129268	0.129268	5.00522e-07	3.87981e-05
SRSF2_Huh7	MRPS18C	3	4:84379499-84379582	2:4	0.772603	0.643599	0.129004	0.129004	0.000337495	0.0102566
SRSF2_Huh7	CD151	2	11:834530-834591	1:3	0.631929	0.760784	-0.128855	0.128855	1.61043e-05	0.000848419
SRSF2_Huh7	IDH3G	10	X:153052256-153052402	9:11	0.827586	0.95614	-0.128554	0.128554	0.00142743	0.0318341
SRSF2_Huh7	ZSWIM7	5	17:15890114-15890206	4:6	0.192982	0.0647059	0.128277	0.128277	0.00123026	0.0284838
SRSF2_Huh7	LOXL4	9	10:100016537-100016704	8:10	0.872727	1	-0.127273	0.127273	1.72375e-05	0.000894723
SRSF2_Huh7	FN1	40	2:216236832-216237098	39:41	0.900213	0.772949	0.127264	0.127264	2.13995e-27	2.09192e-24
SRSF2_Huh7	WWP1	6	8:87410571-87410708	5:7	0.873239	1	-0.126761	0.126761	0.00139736	0.0313222
SRSF2_Huh7	DENND5A	9	11:9192174-9192324	8:10	0.983871	0.857143	0.126728	0.126728	0.000589777	0.0161145
SRSF2_Huh7	TMEM176B	6	7:150491049-150491159	5:7	0.817391	0.943396	-0.126005	0.126005	0.0014172	0.0316862
SRSF2_Huh7	TSPAN17	5	5:176081896-176082021	4:6	0.864662	0.989362	-0.1247	0.1247	0.000449525	0.0130096
SRSF2_Huh7	MRPL49	2	11:64891974-64892124	1:3	0.865979	0.990654	-0.124675	0.124675	0.000412593	0.0122017
SRSF2_Huh7	MICAL2	7	11:12231044-12231145	6:8	0.841693	0.965969	-0.124276	0.124276	7.11039e-11	1.20302e-08
SRSF2_Huh7	ETFB	3	19:51856386-51856544	2:4	0.861194	0.985375	-0.124181	0.124181	4.80283e-17	2.22396e-14
SRSF2_Huh7	SAT2	4	17:7530261-7530362	3:5	0.810909	0.686901	0.124008	0.124008	0.000627983	0.0169478
SRSF2_Huh7	UGGT1	37	2:128938464-128938646	36:38	0.876404	1	-0.123596	0.123596	0.000766155	0.0197963
SRSF2_Huh7	H2AFY	10	5:134678950-134679124	9:11	0.863469	0.987055	-0.123586	0.123586	1.32878e-17	6.31927e-15
SRSF2_Huh7	STAT1	3	2:191875093-191875175	2:4	0.177358	0.0549327	0.122426	0.122426	6.19302e-09	7.16924e-07
SRSF2_Huh7	BCLAF1	13	6:136588167-136588313	12:14	0.532508	0.654867	-0.12236	0.12236	0.0015273	0.0337193
SRSF2_Huh7	BMP2	2	20:6750767-6751119	1:3	0.784091	0.906137	-0.122046	0.122046	8.9914e-06	0.000510364
SRSF2_Huh7	IL6ST	13	5:55248078-55248179	12:14	0.878378	1	-0.121622	0.121622	6.42231e-05	0.00265275
SRSF2_Huh7	MED13	25	17:60033041-60033199	24:26	0.848684	0.97	-0.121316	0.121316	0.00138937	0.031217
SRSF2_Huh7	ATOX1	2	5:151131265-151131340	1:3	0.844504	0.965726	-0.121222	0.121222	2.81355e-10	4.19553e-08
SRSF2_Huh7	C7orf59	2	7:99747122-99747202	1:3	0.863454	0.98452	-0.121066	0.121066	9.10526e-09	1.02703e-06
SRSF2_Huh7	PIK3C2A	9	11:17158029-17158172	8:10	0.864583	0.985612	-0.121028	0.121028	0.000236398	0.00766052
SRSF2_Huh7	GTF3C5	9	9:135930331-135930351	8:10	0.0778443	0.198582	-0.120737	0.120737	0.00228394	0.0461403
SRSF2_Huh7	HECTD1	34	14:31583083-31583265	33:35	0.687984	0.807829	-0.119845	0.119845	6.1866e-06	0.000369015
SRSF2_Huh7	NCK2	5	2:106497784-106498505	4:6	0.850806	0.731278	0.119529	0.119529	0.00145717	0.0324151
SRSF2_Huh7	AURKB	2	17:8113495-8113572	1:3	0.89548	0.776515	0.118965	0.118965	7.43757e-05	0.00301547
SRSF2_Huh7	SPTAN1	24	9:131355262-131355321	23:25	0.393939	0.275033	0.118906	0.118906	1.48474e-06	0.000105345
SRSF2_Huh7	GOPC	7	6:117890735-117890899	6:8	0.881188	1	-0.118812	0.118812	0.000505205	0.014269
SRSF2_Huh7	USP53	19	4:120212320-120212416	18:20	1	0.881356	0.118644	0.118644	0.00100695	0.024439
SRSF2_Huh7	SMARCA1	13	X:128627017-128627052	12:14	0.917476	0.798923	0.118553	0.118553	1.821e-07	1.53313e-05
SRSF2_Huh7	LTBR	10	12:6499278-6499506	9:11	0.881481	1	-0.118519	0.118519	1.90392e-05	0.000968248
SRSF2_Huh7	LRP5	5	11:68133039-68133170	4:6	0.88172	1	-0.11828	0.11828	1.67596e-05	0.000877682
SRSF2_Huh7	RBM34	3	1:235323826-235323962	2:4	0.930147	0.812081	0.118067	0.118067	0.000536358	0.014896
SRSF2_Huh7	ARID4B	29	1:235323826-235323962	28:30	0.930147	0.812081	0.118067	0.118067	0.000536358	0.014896
SRSF2_Huh7	ITGAV	24	2:187531877-187531957	23:25	0.854111	0.97191	-0.117799	0.117799	7.23161e-09	8.31683e-07
SRSF2_Huh7	ASGR2	4	17:7012076-7012207	3:5	0.826873	0.944568	-0.117694	0.117694	5.73997e-08	5.51915e-06
SRSF2_Huh7	LSS	4	21:47642544-47642652	3:5	0.882353	1	-0.117647	0.117647	2.41238e-05	0.00117585
SRSF2_Huh7	RIF1	8	2:152279464-152279556	7:9	0.990654	0.873239	0.117415	0.117415	0.00123941	0.0285827
SRSF2_Huh7	POLB	5	8:42207525-42207583	4:6	0.861314	0.978495	-0.117181	0.117181	8.77854e-05	0.00346339
SRSF2_Huh7	GAK	17	4:871403-871597	16:18	0.883117	1	-0.116883	0.116883	0.000580066	0.0158738
SRSF2_Huh7	RALY	5	20:32661625-32661672	4:6	0.925987	0.810555	0.115432	0.115432	5.45075e-10	7.92657e-08
SRSF2_Huh7	DPP4	24	2:162865072-162865171	23:25	0.827338	0.942424	-0.115086	0.115086	7.07255e-06	0.000417613
SRSF2_Huh7	PDCD6	7	5:306717-306875	6:8	0.989691	0.875	0.114691	0.114691	0.000804649	0.0205197
SRSF2_Huh7	DCTN3	4	9:34616027-34616110	3:5	0.886598	1	-0.113402	0.113402	0.000126095	0.0046427
SRSF2_Huh7	MICAL2	10	11:12241748-12242005	9:11	0.865672	0.978947	-0.113276	0.113276	1.29337e-08	1.44039e-06
SRSF2_Huh7	TBCE	5	1:235582732-235582876	4:6	0.8875	1	-0.1125	0.1125	0.000749101	0.01947
SRSF2_Huh7	ITGA6	6	2:173335702-173335833	5:8	0.8875	1	-0.1125	0.1125	2.37253e-05	0.00116504
SRSF2_Huh7	SPOPL	10	2:139322510-139322563	9:11	0.887755	1	-0.112245	0.112245	0.000218683	0.00717857
SRSF2_Huh7	TMEM98	3	17:31258493-31258677	2:4	0.88785	1	-0.11215	0.11215	4.08549e-05	0.00180257
SRSF2_Huh7	HEATR5A	14	14:31849673-31849784	13:15	0.883117	0.99511	-0.111993	0.111993	7.54584e-11	1.25261e-08
SRSF2_Huh7	PFDN1	2	5:139680001-139680167	1:3	0.813648	0.925197	-0.111549	0.111549	6.62924e-05	0.00271275
SRSF2_Huh7	FNBP4	8	11:47765505-47765715	7:9	0.888889	1	-0.111111	0.111111	3.39825e-05	0.00155313
SRSF2_Huh7	RNF40	9	16:30777484-30777603	8:10	0.888889	1	-0.111111	0.111111	0.000358411	0.0108547
SRSF2_Huh7	C7orf42	7	7:66418213-66418356	6:8	0.888889	1	-0.111111	0.111111	1.77378e-05	0.000917983
SRSF2_Huh7	ITM2C	2	2:231738132-231738272	1:3	0.753247	0.864238	-0.110992	0.110992	0.00149363	0.0331006
SRSF2_Huh7	GCN1L1	29	12:120594265-120594408	28:30	0.890909	1	-0.109091	0.109091	0.00229377	0.0462689
SRSF2_Huh7	NT5C2	9	10:104865115-104865138	8:10	0.104918	0.213333	-0.108415	0.108415	0.00247874	0.0492835
SRSF2_Huh7	SHC1	6	1:154940680-154940733	5:7	0.97136	0.863248	0.108113	0.108113	2.07545e-08	2.2268e-06
SRSF2_Huh7	CALD1	9	7:134620439-134620516	8:10	0.897959	0.790875	0.107085	0.107085	0.00032021	0.0098332
SRSF2_Huh7	DAPK1	12	9:90258291-90258383	11:13	0.863158	0.970149	-0.106991	0.106991	0.00135144	0.0306048
SRSF2_Huh7	CLN3	10	16:28497668-28497811	9:11	0.862385	0.968992	-0.106607	0.106607	2.5288e-05	0.00122581
SRSF2_Huh7	BIRC5	3	17:76212047-76212147	2:4	0.04	0.146552	-0.106552	0.106552	0.000426559	0.012468
SRSF2_Huh7	NUP93	15	16:56867127-56867318	14:16	0.893617	1	-0.106383	0.106383	1.97031e-06	0.000136089
SRSF2_Huh7	RQCD1	2	2:219445284-219445463	1:3	0.893805	1	-0.106195	0.106195	0.000144621	0.00517227
SRSF2_Huh7	COL14A1	54	8:121382575-121383156	53:55	0.33682	0.442623	-0.105803	0.105803	0.000464395	0.0133141
SRSF2_Huh7	SYNJ2	28	6:158510871-158510979	27:29	0.887324	0.992308	-0.104984	0.104984	0.00118448	0.0278267
SRSF2_Huh7	PSAP	12	10:73578788-73578868	11:13	0.87858	0.983333	-0.104754	0.104754	7.30814e-23	5.84518e-20
SRSF2_Huh7	AC103686.3	13	8:48848292-48848460	12:14	0.895522	1	-0.104478	0.104478	6.02375e-07	4.60843e-05
SRSF2_Huh7	APLP2	8	11:129993507-129993674	7:9	0.12967	0.23379	-0.10412	0.10412	1.81991e-09	2.33746e-07
SRSF2_Huh7	UXS1	15	2:106713174-106713277	14:16	0.870968	0.974843	-0.103875	0.103875	0.000839234	0.0211867
SRSF2_Huh7	UTP6	14	17:30202253-30202432	13:15	0.896226	1	-0.103774	0.103774	1.36804e-05	0.000731671
SRSF2_Huh7	NIP7	4	16:69375083-69375223	3:5	0.866279	0.969697	-0.103418	0.103418	0.00180841	0.0385241
SRSF2_Huh7	ALS2CR4	11	2:202492044-202492161	10:12	1	0.897059	0.102941	0.102941	0.00252109	0.0499
SRSF2_Huh7	RAB35	6	12:120536615-120536739	5:7	0.991803	0.888889	0.102914	0.102914	0.000574356	0.0157912
SRSF2_Huh7	RAB4A	7	1:229438609-229438736	6:8	0.89781	1	-0.10219	0.10219	0.000358087	0.0108547
SRSF2_Huh7	LRP10	5	14:23344564-23345581	4:6	0.898438	1	-0.101562	0.101562	0.000315576	0.00975899
SRSF2_Huh7	EXO1	5	1:242015594-242015713	4:6	1	0.898551	0.101449	0.101449	0.0015663	0.034322
SRSF2_Huh7	TCF25	9	16:89960136-89960266	8:10	0.873494	0.974576	-0.101082	0.101082	8.27156e-05	0.00329291
SRSF2_Huh7	CNOT8	4	5:154247252-154247352	3:5	0.13089	0.0299145	0.100976	0.100976	0.000133615	0.00484759
SRSF2_Huh7	MYO6	33	6:76621389-76621415	32:34	0.128571	0.027933	0.100638	0.100638	0.000754231	0.0195456
SRSF2_Huh7	HTT	41	4:3201459-3201666	40:42	0.9	1	-0.1	0.1	0.00189447	0.0399222

## Sheet: SRSF3
	gene_symbol	exon_skipped	coordonnees	exons_flanquants	psi_GM19238_12	psi_GM19238_12	psi_GM19238_12	psi_GM19238_NS1	psi_GM19238_NS2	psi_GM19238_NS3	psi_GM19238_NS4	deltaPSI	valeur abs deltaPSI	pvalue_glm	pvalue_corrigee_glm		negative deltaPsi= activated exons
SRSF3_GM	C13orf23	12	13:39586828-39588613	11:13	0.327354	0.347368	0.169643	1	0.993333	1	1	-0.672646	0.672646	0	0		positive deltaPsi= repressed exons
SRSF3_GM	NCOA6	13	20:33328167-33331145	12:14	0.289855	0.288462	0.25	1	0.882353	0.925373	0.949367	-0.648909	0.648909	4.44089e-16	1.55881e-13
SRSF3_GM	YWHAZ	2	8:101965078-101965221	1:3	0.264706	0.333333	0.2	0.83871	0.92	0.857143	0.918919	-0.623325	0.623325	0	0
SRSF3_GM	HNRNPUL1	17	19:41811551-41811772	16:18	0.384615	0.377143	0.37987	0.967742	0.980769	0.965665	0.970962	-0.589482	0.589482	0	0
SRSF3_GM	CREBBP	14	16:3820571-3820987	13:15	0.474359	0.416667	0.333333	1	0.977778	1	0.985714	-0.57619	0.57619	2.47136e-13	6.37333e-11
SRSF3_GM	ODF3B	3	22:50969999-50970202	2:4	0.363636	0.294118	NA	0.826087	0.857143	0.851852	0.833333	-0.513716	0.513716	5.52685e-09	6.68326e-07
SRSF3_GM	NCOA6	9	20:33345023-33345907	8:10	0.560606	0.488372	0.458333	1	1	1	1	-0.511628	0.511628	5.10703e-15	1.53655e-12
SRSF3_GM	NUMB	9	14:73750789-73751082	7:10	0.360111	0.343042	0.323741	0.858696	0.809365	0.90411	0.841615	-0.507113	0.507113	0	0
SRSF3_GM	ATXN2	11	12:111953958-111954167	10:12	0.651163	0.47619	0.214286	1	1	0.95122	0.92	-0.499419	0.499419	1.45052e-07	1.38336e-05
SRSF3_GM	VASH2	2	1:213124681-213125160	1:3	0.309524	0.444444	0.285714	0.789474	0.851852	0.8	0.64	-0.485213	0.485213	2.4312e-09	3.21695e-07
SRSF3_GM	BLZF1	6	1:169351300-169351519	5:7	0.529412	0.431818	0.468085	0.967213	0.95082	0.926471	0.885417	-0.47056	0.47056	0	0
SRSF3_GM	MAP7D2	8	X:20068942-20069064	7:9	0.289855	0.45	0.305556	0.75	0.723404	0.75	0.784314	-0.444444	0.444444	3.53717e-13	8.67912e-11
SRSF3_GM	TOR2A	2	9:130496578-130496843	1:3	0.212766	0.184211	0.222222	0.565217	0.714286	0.826087	0.566667	-0.42771	0.42771	1.11022e-14	3.30102e-12
SRSF3_GM	C11orf30	7	11:76170977-76171129	6:8	0.428571	0.233333	NA	0.75	0.73913	0.857143	0.531915	-0.413613	0.413613	5.64754e-06	0.000370728
SRSF3_GM	UPB1	8	22:24911169-24911338	7:9	0.410256	0.416667	0.241379	0.785714	0.815789	0.769231	0.846154	-0.390495	0.390495	1.40003e-07	1.34027e-05
SRSF3_GM	SP4	3	7:21468907-21470461	2:4	0.666667	0.592593	0.571429	0.923077	0.947368	1	1	-0.381092	0.381092	4.87144e-12	9.84927e-10
SRSF3_GM	ZNF226	7	19:44679137-44679582	6:8	0.65	0.8	0.723077	0.319149	0.380282	0.276596	0.408451	0.373362	0.373362	1.78025e-09	2.45178e-07
SRSF3_GM	RNH1	3	11:504824-504996	2:4	0.227612	0.265306	0.318681	0.638889	0.615385	0.636364	0.653846	-0.37232	0.37232	8.59313e-14	2.31036e-11
SRSF3_GM	SH2B1	7	16:28883101-28883304	6:8	0.534884	0.47619	NA	0.892857	0.9375	0.861111	0.761905	-0.371447	0.371447	1.10187e-05	0.000659894
SRSF3_GM	C1orf85	2	1:156264550-156264807	1:3	0.512397	0.439252	0.481481	0.877358	0.832117	0.752475	0.870504	-0.369829	0.369829	0	0
SRSF3_GM	USP30	7	12:109495731-109495913	6:8	0.631579	0.526316	0.409091	0.863636	0.84	0.916667	0.928571	-0.363836	0.363836	1.40478e-05	0.000810572
SRSF3_GM	EML4	4	2:42488261-42488434	3:5	0.62987	0.650685	0.584416	1	0.993289	0.984252	0.990291	-0.36192	0.36192	0	0
SRSF3_GM	ARHGAP10	21	4:148984299-148984451	20:22	0.375	0.512821	0.383333	0.747475	0.742647	0.759259	0.725	-0.361728	0.361728	0	0
SRSF3_GM	BSCL2	9	11:62458752-62458893	8:10	0.613636	0.653846	0.6	0.931298	0.978873	0.993056	0.966667	-0.359134	0.359134	0	0
SRSF3_GM	C1orf103	2	1:111493910-111495437	1:3	0.15	0.185185	0.0826446	0.45122	0.413223	0.564815	0.542254	-0.346737	0.346737	0	0
SRSF3_GM	KIF21A	30	12:39709726-39709772	29:31	0.416667	0.419355	NA	0.0625	0.155556	0.0416667	0.0909091	0.341306	0.341306	2.83052e-08	3.0702e-06
SRSF3_GM	RFFL	10	17:33348390-33348800	9:11	0.49434	0.484043	0.459677	0.838926	0.769231	0.865169	0.801619	-0.33623	0.33623	0	0
SRSF3_GM	HIRA	19	22:19365392-19365589	18:20	0.644928	0.589474	0.605263	0.917808	0.977528	0.948454	0.933333	-0.33563	0.33563	5.77649e-13	1.33935e-10
SRSF3_GM	C22orf39	20	22:19365392-19365589	19:21	0.644928	0.589474	0.605263	0.917808	0.977528	0.948454	0.933333	-0.33563	0.33563	5.77649e-13	1.33935e-10
SRSF3_GM	UNK	3	17:73787841-73788100	2:4	0.627907	0.633333	0.411765	0.947368	0.967742	0.881356	0.973333	-0.329648	0.329648	2.22045e-15	7.19453e-13
SRSF3_GM	PLSCR1	6	3:146246401-146246618	5:7	0.5	0.544776	0.583333	0.882883	0.852399	0.890909	0.829787	-0.322865	0.322865	0	0
SRSF3_GM	MAP4	15	3:47917175-47917390	14:16	0.676744	0.631579	0.6875	1	0.997347	0.995122	0.998024	-0.320941	0.320941	0	0
SRSF3_GM	MGA	16	15:42034744-42035370	15:17	0.451613	0.342857	0.421053	0.708333	0.56	0.774194	0.8	-0.320211	0.320211	3.43785e-06	0.000243375
SRSF3_GM	DHRS11	3	17:34951401-34951610	2:4	0.5	0.607143	0.647059	0.954545	1	0.9	0.810811	-0.32013	0.32013	1.32312e-06	0.000105155
SRSF3_GM	ATG16L1	8	2:234182367-234182423	7:9	0.619048	0.68	NA	0.346154	0.333333	0.3	0.411765	0.30978	0.30978	2.39915e-05	0.00128461
SRSF3_GM	MPI	7	15:75189352-75189560	6:8	0.275862	0.307692	0.301205	0.616	0.596154	0.738739	0.563218	-0.304872	0.304872	0	0
SRSF3_GM	CCDC88A	27	2:55530205-55530288	26:28	0.814159	0.784091	0.763158	0.469697	0.464286	0.489362	0.59375	0.304562	0.304562	1.7851e-07	1.6897e-05
SRSF3_GM	TEX261	3	2:71218960-71219113	2:4	0.586777	0.54902	0.6	0.909677	0.889474	0.886076	0.888462	-0.302191	0.302191	0	0
SRSF3_GM	HISPPD1	29	5:102523015-102523077	28:31	0.62963	0.48	NA	0.266667	0.23913	0.238095	0.352941	0.301916	0.301916	8.15407e-06	0.000516486
SRSF3_GM	PHC3	5	3:169866874-169867032	4:6	0.580645	0.731707	0.615385	0.916667	0.909091	0.95122	0.9125	-0.299199	0.299199	8.85884e-11	1.54406e-08
SRSF3_GM	C11orf30	16	11:76246939-76247103	15:17	0.666667	0.65	NA	1	0.909091	1	0.888889	-0.296212	0.296212	0.00220273	0.0496605
SRSF3_GM	PRDM4	10	12:108134723-108135037	9:11	0.745098	0.658537	0.608696	0.941176	0.923077	1	0.968254	-0.296179	0.296179	7.97118e-12	1.59885e-09
SRSF3_GM	PUM2	14	2:20478344-20478580	13:15	0.277228	0.362416	0.313043	0.611702	0.603239	0.616279	0.583691	-0.294427	0.294427	0	0
SRSF3_GM	YIPF1	12	1:54320674-54320724	11:13	0.887218	0.8	0.88	0.583333	0.589552	0.574713	0.683453	0.293557	0.293557	4.44089e-15	1.35222e-12
SRSF3_GM	CCDC132	19	7:92935140-92935316	18:20	0.727273	0.708333	0.5	1	1	1	0.987342	-0.291667	0.291667	0	0
SRSF3_GM	TMEM189	7	20:48744512-48744724	6:8	0.8	0.636364	0.710526	1	1	1	1	-0.289474	0.289474	4.44089e-16	1.55881e-13
SRSF3_GM	TMEM189-UBE2V1	7	20:48744512-48744724	6:8	0.8	0.636364	0.710526	1	1	1	1	-0.289474	0.289474	4.44089e-16	1.55881e-13
SRSF3_GM	LRP8	16	1:53722912-53723136	15:17	0.6875	0.423077	NA	0.909091	0.847826	0.840909	0.8	-0.289079	0.289079	2.69622e-05	0.00141961
SRSF3_GM	C22orf25	8	22:20040883-20041074	7:9	0.483333	0.288136	0.304348	0.692308	0.57377	0.611111	0.5	-0.288093	0.288093	3.3232e-06	0.000236584
SRSF3_GM	FASTK	2	7:150776587-150777009	1:3	0.646341	0.578947	0.693333	0.961832	0.931677	0.935065	0.923913	-0.28703	0.28703	0	0
SRSF3_GM	RNF31	28	14:24633823-24634164	27:29	0.768317	0.664122	0.6875	0.957983	0.982379	0.964557	0.980507	-0.285032	0.285032	0	0
SRSF3_GM	IRF9	7	14:24633823-24634164	6:8	0.768317	0.664122	0.6875	0.957983	0.982379	0.964557	0.980507	-0.285032	0.285032	0	0
SRSF3_GM	SMAP1	9	6:71501392-71501472	8:10	0.469799	0.466667	0.614286	0.180851	0.253521	0.176991	0.190184	0.284281	0.284281	0	0
SRSF3_GM	C14orf153	23	14:104159890-104160290	22:24	0.307692	0.5	NA	0.625	0.833333	0.692308	0.68	-0.282308	0.282308	0.000144719	0.00578717
SRSF3_GM	BRD8	9	5:137504159-137504377	8:10	0.616667	0.458333	0.642857	0.867647	0.857143	0.979592	0.928571	-0.281443	0.281443	1.96509e-14	5.77487e-12
SRSF3_GM	APLP2	8	11:129993507-129993674	7:9	0.571429	0.62963	0.588235	0.434783	0.307692	0.307692	0.255319	0.280543	0.280543	0.000110201	0.00460348
SRSF3_GM	LUZP1	3	1:23436078-23436143	2:4	0.681818	0.681818	NA	0.555556	0.413793	0.227273	0.390244	0.2798	0.2798	0.00142329	0.0359829
SRSF3_GM	SEC24C	2	10:75506388-75506474	1:3	0.494024	0.645833	0.551181	0.25	0.298913	0.252809	0.290429	0.279562	0.279562	2.26976e-09	3.01914e-07
SRSF3_GM	E2F7	12	12:77419338-77419762	11:13	0.62069	0.652174	NA	0.88	0.969697	0.939394	0.892308	-0.279419	0.279419	1.58362e-05	0.00090125
SRSF3_GM	MCTP1	7	5:94267658-94267696	6:9	0.545455	0.542857	0.233333	0.918919	0.815789	0.827586	0.72549	-0.278831	0.278831	8.90724e-07	7.40502e-05
SRSF3_GM	XRCC3	2	14:104179212-104179305	1:3	0.684211	0.884615	0.866667	0.588235	0.7	0.5	0.589744	0.277677	0.277677	0.000749333	0.0219088
SRSF3_GM	PRR14	9	16:30665950-30666535	8:10	0.731183	0.692308	0.657895	1	0.962963	0.954887	0.973684	-0.276016	0.276016	0	0
SRSF3_GM	MPHOSPH9	10	12:123687661-123687922	9:11	0.2	0.202899	0.315789	0.5	0.402985	0.543478	0.455882	-0.275043	0.275043	9.1016e-07	7.5418e-05
SRSF3_GM	PPARA	11	22:46615709-46615911	10:12	0.848485	0.758621	0.866667	0.5	0.742857	0.647059	0.487805	0.274955	0.274955	0.000312053	0.010893
SRSF3_GM	AL137003.1	2	6:16753464-16753578	1:3	0.676471	0.62069	0.590909	0.860465	0.928571	0.833333	0.928571	-0.273829	0.273829	8.28545e-07	6.91083e-05
SRSF3_GM	SCRIB	36	8:144873836-144873910	35:37	0.310345	0.304348	NA	0.037037	0.0285714	0.104167	0.0338983	0.271879	0.271879	2.05833e-10	3.40001e-08
SRSF3_GM	ZNF317	5	19:9268510-9268751	4:6	0.5	0.470588	0.513889	0.763889	0.773109	0.777778	0.662069	-0.268499	0.268499	2.42761e-12	5.15572e-10
SRSF3_GM	ZMYM6	6	1:35484954-35485203	5:7	0.64	0.846154	0.724138	0.956522	1	0.980392	1	-0.266058	0.266058	1.15596e-12	2.58537e-10
SRSF3_GM	OXA1L	2	14:23236457-23236618	1:3	0.742656	0.714286	0.69697	0.981022	0.97909	0.979798	0.977273	-0.265158	0.265158	0	0
SRSF3_GM	TMTC1	7	12:29904599-29904805	6:9	0.704918	0.675	0.636364	1	0.941176	0.9375	0.90566	-0.264338	0.264338	5.90583e-08	5.98779e-06
SRSF3_GM	FAM189B	9	1:155220067-155220720	8:10	0.736842	0.62963	0.785714	0.980769	1	1	1	-0.263158	0.263158	6.37268e-14	1.76985e-11
SRSF3_GM	FASTKD3	2	5:7866759-7868309	1:3	0.628571	0.517241	0.392857	0.736842	0.765957	0.787879	0.880952	-0.259677	0.259677	3.95743e-07	3.48488e-05
SRSF3_GM	WDR54	2	2:74649280-74649502	1:3	0.711864	0.67033	0.544776	0.92	0.94709	0.929078	0.923529	-0.255974	0.255974	0	0
SRSF3_GM	LGTN	10	1:206772817-206772966	9:11	0.70073	0.703057	0.7	0.950617	0.9631	0.959016	0.945578	-0.254087	0.254087	0	0
SRSF3_GM	YTHDF2	4	1:29068915-29070498	3:5	0.6625	0.657388	0.576923	0.908537	0.914127	0.942308	0.900726	-0.253944	0.253944	0	0
SRSF3_GM	AP2B1	18	17:33997876-33997917	17:19	0.764505	0.743682	0.778689	0.465347	0.519713	0.530249	0.505917	0.25169	0.25169	3.10427e-10	4.96545e-08
SRSF3_GM	MLLT10	16	10:21962279-21962848	15:17	0.8	0.736842	0.631579	0.972222	1	0.973684	1	-0.25	0.25	7.50175e-11	1.32582e-08
SRSF3_GM	ABCD4	3	14:74766251-74766378	2:4	0.804348	0.852941	0.882353	0.842105	0.6875	0.514286	0.518519	0.249932	0.249932	0.00025935	0.00947908
SRSF3_GM	PLD1	20	3:171404475-171404588	19:21	0.342857	0.349398	0.310345	0.683333	0.560976	0.616438	0.493506	-0.24585	0.24585	2.07582e-09	2.79054e-07
SRSF3_GM	ZMYM5	5	13:20412840-20413125	4:6	0.479167	0.611111	NA	0.678571	0.851064	0.72973	0.882353	-0.245258	0.245258	4.46148e-06	0.000303922
SRSF3_GM	RWDD1	2	6:116894021-116894148	1:3	0.377049	0.40678	0.255814	0.126214	0.146154	0.1375	0.0948276	0.245192	0.245192	2.11084e-06	0.00016215
SRSF3_GM	CEP164	19	11:117253512-117253658	18:20	0.137931	0	NA	0.35	0.294118	0.333333	0.285714	-0.24476	0.24476	8.60415e-05	0.00375566
SRSF3_GM	CHCHD7	2	8:57125321-57125468	1:3	0.689189	0.715909	0.75	0.457711	0.480687	0.461905	0.562753	0.244613	0.244613	3.33067e-16	1.29502e-13
SRSF3_GM	RNF14	6	5:141354369-141354520	5:7	0.5	0.545455	0.493506	0.794872	0.740506	0.747748	0.732143	-0.244127	0.244127	4.8983e-13	1.16788e-10
SRSF3_GM	ZNF498	3	7:99216671-99216755	2:4	0.864865	0.810811	0.764706	0.527778	0.580645	0.72973	0.553191	0.243892	0.243892	0.000224882	0.00834939
SRSF3_GM	CLSPN	25	1:36197713-36202207	24:26	0.541667	0.56	NA	0.809524	0.777778	0.857143	0.702128	-0.242817	0.242817	0.000488151	0.0155183
SRSF3_GM	KLHL2	16	4:166242464-166242527	15:17	0.507463	0.492063	0.416667	0.241379	0.25974	0.228571	0.375	0.241504	0.241504	3.22073e-05	0.00165106
SRSF3_GM	MTMR12	14	5:32235068-32235235	13:15	0.753846	0.676471	0.566667	0.892857	0.868852	0.954545	0.935065	-0.23749	0.23749	2.68191e-09	3.4759e-07
SRSF3_GM	KIAA0196	2	8:126095955-126096264	1:3	0.607595	0.558824	0.676471	0.719298	0.847222	0.842857	0.913043	-0.237445	0.237445	3.73677e-07	3.30207e-05
SRSF3_GM	TMX2	3	11:57505308-57505498	2:4	0.546083	0.56743	0.589655	0.814696	0.806373	0.777409	0.801527	-0.23652	0.23652	3.33067e-15	1.0522e-12
SRSF3_GM	NUP54	6	4:77057339-77057565	5:7	0.820896	0.746269	0.602273	0.985401	0.979592	0.954955	0.988304	-0.236228	0.236228	0	0
SRSF3_GM	RMND1	2	6:151766443-151766960	1:4	0.695122	0.677419	0.727273	0.940299	0.922078	0.848485	0.963855	-0.236066	0.236066	4.73532e-11	8.54827e-09
SRSF3_GM	WAC	9	10:28884662-28884970	8:10	0.584586	0.621381	0.473684	0.766382	0.835443	0.80203	0.858951	-0.23415	0.23415	4.21372e-09	5.34768e-07
SRSF3_GM	ERBB2IP	23	5:65367997-65368119	22:24	0.363636	0.28125	NA	0.513514	0.632653	0.45	0.595745	-0.232186	0.232186	0.000820647	0.023649
SRSF3_GM	UBE3B	25	12:109961783-109961920	24:26	0.767857	0.84	0.555556	1	1	1	0.933333	-0.232143	0.232143	2.85538e-12	5.96397e-10
SRSF3_GM	ASAP1	25	8:131104219-131104389	24:26	0.658537	0.583333	NA	0.857143	0.848485	0.926829	0.8125	-0.231879	0.231879	1.07769e-05	0.000648487
SRSF3_GM	ZNF79	2	9:130190831-130190939	1:3	0.625	0.689655	NA	0.5	0.354839	0.285714	0.538462	0.229908	0.229908	0.00159387	0.0387326
SRSF3_GM	DNM2	13	19:10908056-10908194	12:14	0.609023	0.60515	0.592233	0.398058	0.363985	0.378182	0.373626	0.229246	0.229246	3.23891e-08	3.49816e-06
SRSF3_GM	CLK1	5	2:201724848-201725154	4:6	0.835294	0.862637	0.877358	0.62069	0.79646	0.578947	0.649123	0.227731	0.227731	4.97933e-06	0.000334688
SRSF3_GM	PPIL3	13	2:201724848-201725154	12:14	0.835294	0.862637	0.877358	0.62069	0.79646	0.578947	0.649123	0.227731	0.227731	4.97933e-06	0.000334688
SRSF3_GM	ANKHD1	33	5:139914947-139915123	30:34	0.632184	0.626506	0.59375	0.863636	0.84375	0.829412	0.897436	-0.227187	0.227187	2.17058e-07	2.00942e-05
SRSF3_GM	R3HDM1	24	2:136473120-136473264	23:25	0.754386	0.76378	0.755102	0.993007	0.988764	0.963731	0.967136	-0.222848	0.222848	1.55431e-15	5.10158e-13
SRSF3_GM	TMEM116	10	12:112374496-112374634	9:11	0.857143	0.652174	0.45	0.782609	0.944444	0.882353	0.863636	-0.220821	0.220821	0.000436774	0.0142433
SRSF3_GM	TRIM33	12	1:114963002-114963073	11:13	0.326087	0.277778	0.473684	0.108108	0.102564	0.0727273	0.142857	0.220751	0.220751	0.000195932	0.0075141
SRSF3_GM	KDM2B	19	12:121881483-121881596	18:20	0.835366	0.77	0.754717	1	1	0.979167	0.976879	-0.219583	0.219583	2.22045e-16	8.90751e-14
SRSF3_GM	USP4	7	3:49348947-49350046	6:8	0.423729	0.340278	0.435897	0.677966	0.62987	0.635593	0.650794	-0.219465	0.219465	3.36398e-14	9.77216e-12
SRSF3_GM	ZNF614	5	19:52520829-52520950	4:6	0.0909091	0.0888889	0.185185	0.25	0.314286	0.30303	0.368421	-0.217749	0.217749	0.00112324	0.0300717
SRSF3_GM	ZNF207	10	17:30693684-30693776	9:11	0.252778	0.243165	0.240541	0.432817	0.538547	0.395954	0.487179	-0.216833	0.216833	8.57714e-12	1.69352e-09
SRSF3_GM	SLC2A8	5	9:130164836-130165032	4:6	0.575	0.533333	0.473684	0.78125	0.7	0.75	0.75	-0.216667	0.216667	0.000555834	0.017357
SRSF3_GM	CD164	6	6:109691614-109691670	5:7	0.674113	0.71002	0.654773	0.885457	0.886076	0.892284	0.907692	-0.215067	0.215067	0	0
SRSF3_GM	KIF23	21	15:69733107-69733418	20:22	0.144928	0.1375	0.125	0.363636	0.341463	0.368421	0.330357	-0.21505	0.21505	1.02306e-07	1.00216e-05
SRSF3_GM	CARM1	15	19:11032051-11032119	14:16	0.494253	0.480349	0.513761	0.275194	0.314754	0.27451	0.283912	0.2147	0.2147	1.60406e-05	0.000908953
SRSF3_GM	FCHO1	21	19:17889418-17889693	20:22	0.896552	0.769231	0.785714	1	1	1	1	-0.214286	0.214286	4.50914e-08	4.74831e-06
SRSF3_GM	KIF21A	29	12:39711875-39712003	28:30	0.857143	0.714286	NA	1	1	0.961538	1	-0.214286	0.214286	1.15861e-05	0.000685751
SRSF3_GM	LAS1L	9	X:64744444-64744494	8:10	0.459016	0.424528	0.5	0.239316	0.251908	0.21831	0.26455	0.213404	0.213404	1.68091e-10	2.79484e-08
SRSF3_GM	SLAIN1	7	13:78320649-78320990	6:8	0.84	0.775362	0.765957	0.983333	0.993103	0.97037	1	-0.212856	0.212856	0	0
SRSF3_GM	TMEM126B	2	11:85340176-85340306	1:3	0.28125	0.273381	0.342857	0.05	0.0714286	0.104167	0.0672269	0.211922	0.211922	3.90239e-09	5.00635e-07
SRSF3_GM	ORC3L	3	6:88304260-88304331	2:4	0.357143	0.369565	0.419048	0.180645	0.174757	0.113208	0.142857	0.210758	0.210758	0	0
SRSF3_GM	HIPK3	15	11:33369712-33369774	14:16	0.697674	0.626374	0.716981	0.45977	0.504274	0.5	0.475806	0.209771	0.209771	1.50799e-06	0.000118359
SRSF3_GM	SMEK2	12	2:55805383-55805478	11:13	0.305439	0.334842	0.37963	0.516854	0.549587	0.547486	0.539095	-0.208449	0.208449	9.9365e-14	2.64342e-11
SRSF3_GM	DYRK4	10	12:4716493-4716553	9:11	0.465517	0.466667	0.395349	0.720588	0.619048	0.627119	0.792453	-0.208336	0.208336	0.000890342	0.0250573
SRSF3_GM	AP1AR	6	4:113184144-113184242	5:7	0.712766	0.76087	0.62963	0.94186	0.92	0.921348	0.857143	-0.207908	0.207908	8.26317e-12	1.64437e-09
SRSF3_GM	PATL1	7	11:59423429-59423518	6:8	0.556391	0.46789	0.589744	0.73913	0.765152	0.763158	0.825301	-0.207764	0.207764	0.000111573	0.00464544
SRSF3_GM	MTRR	3	5:7873486-7873639	2:4	0.810458	0.726027	0.791209	0.602041	0.621212	0.566038	0.56129	0.20717	0.20717	2.45988e-09	3.22365e-07
SRSF3_GM	ASPH	6	8:62587819-62588878	5:9	0.0930233	0.236842	0.206897	0	0	0	0	0.206897	0.206897	2.46177e-09	3.22365e-07
SRSF3_GM	MFSD9	3	2:103348483-103348597	2:4	0.3125	0.368421	NA	0.206897	0.128205	0.0689655	0.142857	0.204929	0.204929	0.000508452	0.0160576
SRSF3_GM	PDLIM5	8	4:95506137-95506154	6:9	0.223684	0.269231	0.151515	0.025641	0.0555556	0.0128205	0.0113636	0.204453	0.204453	2.67475e-11	5.00733e-09
SRSF3_GM	RBM33	13	7:155532409-155532720	12:14	0.796296	0.742857	0.857143	1	1	1	1	-0.203704	0.203704	1.67864e-11	3.18979e-09
SRSF3_GM	FBXO38	15	5:147806776-147807510	14:16	0.782178	0.618557	0.571429	0.823529	0.72973	0.819277	0.865979	-0.202847	0.202847	0.00157719	0.0384011
SRSF3_GM	FBXO4	6	5:41939543-41939718	5:7	0.692308	0.764706	0.735294	0.927536	0.963855	0.948276	0.882353	-0.202612	0.202612	3.0849e-07	2.78445e-05
SRSF3_GM	ZNF410	11	14:74388769-74388909	10:12	0.712042	0.784722	0.816327	0.572289	0.645933	0.593333	0.516484	0.201911	0.201911	5.05714e-11	9.00065e-09
SRSF3_GM	RBM4B	3	11:66436086-66436762	2:4	0.771429	0.882353	0.8	1	0.935484	1	1	-0.2	0.2	4.30835e-05	0.00211839
SRSF3_GM	FRYL	38	4:48555232-48555400	37:39	0.8	0.725	1	1	1	1	1	-0.2	0.2	7.84034e-11	1.37603e-08
SRSF3_GM	BBX	16	3:107508634-107508723	15:17	0.333333	0.289157	0.369565	0.52459	0.593407	0.408451	0.541985	-0.199954	0.199954	4.22538e-06	0.000290185
SRSF3_GM	ARID1B	12	6:157495981-157496139	11:13	0.181818	0.148936	0.0555556	0.355932	0.388889	0.341772	0.336449	-0.199916	0.199916	1.71589e-08	1.92736e-06
SRSF3_GM	OSBPL9	15	1:52221992-52222030	14:16	0.212008	0.208333	0.243402	0.416667	0.422053	0.402778	0.406518	-0.199585	0.199585	1.43079e-11	2.73942e-09
SRSF3_GM	C11orf82	4	11:82641199-82641316	3:5	0.941176	0.9	1	0.866667	0.714286	0.684211	0.769231	0.199418	0.199418	0.000317315	0.0110291
SRSF3_GM	FAM135A	11	6:71195870-71195947	10:12	0.680851	0.617021	0.636364	0.9	0.789474	0.815789	0.854839	-0.19895	0.19895	0.000376994	0.0127547
SRSF3_GM	PIBF1	2	13:73357561-73357859	1:3	0.837209	0.621622	0.764706	0.969697	0.957447	0.974359	0.884615	-0.198866	0.198866	2.58643e-06	0.000195709
SRSF3_GM	LSM14A	5	19:34706029-34706205	4:6	0.707812	0.693015	0.689655	0.894089	0.880992	0.905702	0.885626	-0.196843	0.196843	0	0
SRSF3_GM	SLAIN2	8	4:48422142-48422460	6:9	0.824	0.80402	0.721805	1	1	1	1	-0.19598	0.19598	0	0
SRSF3_GM	DYRK2	2	12:68043577-68043725	1:3	0.5	0.533333	0.4	0.625	0.733333	0.931034	0.658537	-0.195935	0.195935	6.19967e-05	0.00286443
SRSF3_GM	TMEM161B	14	5:87493486-87493582	13:15	0.548387	0.546667	0.595745	0.709677	0.65625	0.854167	0.777778	-0.195341	0.195341	8.69579e-05	0.0037761
SRSF3_GM	SLCO4A1	9	20:61299364-61299536	8:10	0.73913	0.684211	NA	0.9375	0.925	0.888889	0.886364	-0.195274	0.195274	0.000427319	0.0140073
SRSF3_GM	PDCD6IP	17	3:33906735-33906922	16:18	0.782979	0.702586	0.790476	0.946502	0.988506	0.978022	0.978395	-0.19523	0.19523	0	0
SRSF3_GM	FCRL4	4	1:157557655-157557909	3:5	1	0.875	1	0.83871	0.8	0.8125	0.792453	0.19375	0.19375	0.000694341	0.0207873
SRSF3_GM	LCOR	7	10:98708765-98709052	6:8	0.882353	0.733333	NA	1	1	1	1	-0.192157	0.192157	0.000574203	0.0177486
SRSF3_GM	PLSCR3	4	17:7296920-7297155	3:5	0.458333	0.381295	0.3	0.612069	0.534247	0.621622	0.532051	-0.191863	0.191863	1.71913e-09	2.38723e-07
SRSF3_GM	MYO5A	32	15:52630007-52630081	31:33	0.514423	0.571429	0.552632	0.404762	0.38	0.343511	0.333333	0.190876	0.190876	1.87608e-08	2.09797e-06
SRSF3_GM	MED31	3	17:6553302-6553398	2:4	0.716312	0.75641	0.80597	0.572917	0.692308	0.549451	0.559322	0.190291	0.190291	1.43096e-06	0.000113014
SRSF3_GM	ZNF256	2	19:58455302-58455428	1:3	0.95	0.857143	NA	0.714286	0.764706	NA	0.56	0.189286	0.189286	0.00189222	0.0443207
SRSF3_GM	OSBPL3	9	7:24902819-24902911	8:10	0.821429	0.75	0.754717	0.567164	0.653061	0.55814	0.566667	0.187802	0.187802	2.45658e-07	2.24946e-05
SRSF3_GM	SLC2A6	8	9:136338537-136338722	7:9	0.624113	0.630769	0.622222	0.787037	0.834862	0.788136	0.834783	-0.187346	0.187346	0.00114088	0.0304795
SRSF3_GM	IFI27L1	4	14:94568160-94568321	3:5	0.677165	0.773585	0.826087	0.951456	0.944444	0.969697	0.989899	-0.186992	0.186992	5.55112e-16	1.89586e-13
SRSF3_GM	NCAPG	19	4:17842230-17842316	18:20	0.753304	0.790476	0.806452	0.980392	0.973684	0.973118	0.990132	-0.186562	0.186562	0	0
SRSF3_GM	RGP1	8	9:35751953-35752142	7:9	0.76087	0.875	0.736842	0.928571	0.952381	0.98	0.939394	-0.185018	0.185018	3.29613e-05	0.00167612
SRSF3_GM	SLC27A5	10	19:59010152-59010282	9:11	0.746835	0.814286	0.756098	0.950495	0.921053	0.959459	0.926829	-0.182565	0.182565	2.88323e-06	0.000209994
SRSF3_GM	SLAMF7	2	1:160717984-160718304	1:3	0.703098	0.679227	0.743375	0.866815	0.886667	0.885264	0.885362	-0.182215	0.182215	0	0
SRSF3_GM	MACC1	2	7:20224612-20224701	1:3	0.423529	0.518182	0.568182	0.305556	0.366667	0.294118	0.457944	0.182071	0.182071	0.000478946	0.015322
SRSF3_GM	EIF4H	5	7:73604577-73604636	4:6	0.443743	0.464476	0.458274	0.262617	0.289916	0.226234	0.305656	0.182008	0.182008	5.39437e-09	6.55442e-07
SRSF3_GM	LRIG1	7	3:66460553-66460696	6:8	0.772727	0.863636	NA	1	1	0.913043	1	-0.181818	0.181818	0.00131784	0.0339162
SRSF3_GM	ODF2L	7	1:86847925-86848041	6:8	0.941176	0.903226	1	0.84	0.826087	0.681818	0.693878	0.181194	0.181194	0.000298389	0.0105767
SRSF3_GM	LARP4	10	12:50847243-50847455	9:11	0.711712	0.814159	0.723077	0.949495	0.904762	0.876812	0.903614	-0.181111	0.181111	9.8427e-09	1.157e-06
SRSF3_GM	CGGBP1	5	3:88106341-88106442	4:6	0.370044	0.411765	0.364198	0.204651	0.211726	0.143478	0.174603	0.180417	0.180417	1.20645e-10	2.0742e-08
SRSF3_GM	CLCN6	12	1:11888515-11888681	11:13	0.888889	1	NA	0.8125	0.764706	NA	0.75	0.179739	0.179739	0.00144128	0.0360823
SRSF3_GM	DOT1L	22	19:2217771-2217917	21:23	0.808511	0.866667	0.681818	1	1	0.94958	0.97619	-0.179585	0.179585	9.80537e-07	8.04582e-05
SRSF3_GM	XPO4	3	13:21437108-21437262	2:4	0.170213	0.288889	0.259259	0.0862069	0.0740741	0.0638298	0.180556	0.179119	0.179119	0.000892318	0.0250573
SRSF3_GM	SPEN	3	1:16202697-16203173	2:4	0.894737	0.75	NA	1	1	1	1	-0.177632	0.177632	9.60042e-05	0.00410544
SRSF3_GM	MAP3K4	18	6:161519310-161519459	17:19	0.363636	0.392857	0.25	0.241935	0.182927	0.189873	0.144144	0.177236	0.177236	0.000208243	0.00785164
SRSF3_GM	AF196779.12	7	X:48935302-48935406	6:8	0.748252	0.695652	0.730159	0.897959	0.936842	0.915663	0.865169	-0.176652	0.176652	2.69438e-06	0.00020028
SRSF3_GM	WDR45	9	X:48935302-48935406	8:10	0.748252	0.695652	0.730159	0.897959	0.936842	0.915663	0.865169	-0.176652	0.176652	2.69438e-06	0.00020028
SRSF3_GM	C8orf76	4	8:124265562-124268411	3:5	0.728395	0.782051	0.810811	0.944444	0.951807	0.965517	0.96875	-0.176611	0.176611	3.63051e-10	5.699e-08
SRSF3_GM	ZHX1	4	8:124265562-124268411	3:5	0.728395	0.782051	0.810811	0.944444	0.951807	0.965517	0.96875	-0.176611	0.176611	3.63051e-10	5.699e-08
SRSF3_GM	USF2	4	19:35760706-35760906	3:5	0.716561	0.651741	0.586777	0.824373	0.828671	0.837288	0.822742	-0.174781	0.174781	7.15989e-07	6.07222e-05
SRSF3_GM	FAM48A	25	13:37591382-37591501	24:26	0.792793	0.8	0.843137	1	0.972727	0.971963	0.975806	-0.174267	0.174267	4.32987e-15	1.3345e-12
SRSF3_GM	WIPF2	6	17:38420555-38421398	5:7	0.826923	0.8	0.842105	1	1	1	1	-0.173077	0.173077	6.42589e-10	9.49716e-08
SRSF3_GM	SEC61A1	11	3:127785797-127785994	9:12	0.817822	0.830931	0.825243	0.99865	0.998865	0.996364	0.993164	-0.172264	0.172264	0	0
SRSF3_GM	TP53INP1	4	8:95944298-95944335	3:5	0.64	0.758621	0.604167	0.803279	0.754386	0.909091	0.819672	-0.171475	0.171475	0.000208784	0.00785206
SRSF3_GM	AC004381.6	11	16:20835761-20835849	10:12	1	0.972222	1	0.8	0.9375	0.769231	0.857143	0.171429	0.171429	0.000215791	0.00807953
SRSF3_GM	E2F6	2	2:11598407-11598477	1:3	0.258065	0.227273	0.257143	0.125	0.0757576	0.0789474	0.09375	0.170794	0.170794	5.94603e-05	0.00278285
SRSF3_GM	NUDT1	2	7:2282560-2282683	1:3	0.494253	0.553846	0.433962	0.297619	0.315315	0.346154	0.333333	0.169929	0.169929	8.37235e-05	0.00368631
SRSF3_GM	PPP6R3	2	11:68272613-68272739	1:3	0.634483	0.688889	0.472222	0.463636	0.466258	0.445312	0.5	0.169536	0.169536	8.36148e-05	0.00368631
SRSF3_GM	FBXO25	5	8:382886-382935	4:6	0.692308	0.669355	0.671875	0.850467	0.863248	0.819277	0.832258	-0.169488	0.169488	1.11902e-07	1.09193e-05
SRSF3_GM	PPM1M	4	3:52280990-52281244	3:5	0.677778	0.56338	0.676056	0.839286	0.838235	0.87037	0.847222	-0.167198	0.167198	7.33682e-05	0.003323
SRSF3_GM	FAM73A	10	1:78324999-78325071	9:11	0.842105	NA	0.823529	1	1	1	1	-0.167183	0.167183	0.000234957	0.00865607
SRSF3_GM	BIRC6	41	2:32712714-32712868	40:42	0.820225	0.833333	0.851852	1	1	1	1	-0.166667	0.166667	4.50032e-09	5.63052e-07
SRSF3_GM	C6orf70	10	6:170166734-170166763	9:11	0.761905	0.7	0.736842	0.904762	0.901408	0.924528	0.857143	-0.166243	0.166243	1.82284e-05	0.00102268
SRSF3_GM	LAT2	2	7:73629152-73629340	1:3	0.62807	0.674129	0.594502	0.786585	0.806273	0.785219	0.801852	-0.166148	0.166148	9.3244e-10	1.31651e-07
SRSF3_GM	ABCA6	15	17:67109363-67109501	14:16	0.770492	0.703704	0.774194	0.615385	0.59375	0.658537	0.447761	0.165924	0.165924	0.000417241	0.0137648
SRSF3_GM	ZFAND1	3	8:82629484-82629523	2:4	0.381148	0.353414	0.325153	0.563265	0.525	0.492063	0.512903	-0.165538	0.165538	1.30805e-06	0.000104285
SRSF3_GM	IP6K1	2	3:49785251-49785601	1:3	0.66	0.678571	0.756098	0.935484	0.830189	0.854369	0.833333	-0.16528	0.16528	0.00150834	0.0372268
SRSF3_GM	VRK2	21	2:58381889-58381937	20:22	0.434263	0.478723	0.46875	0.343109	0.315789	0.291553	0.287671	0.165079	0.165079	0	0
SRSF3_GM	RAG1AP1	4	1:155110037-155110198	3:5	0.778571	0.767857	0.678571	0.896296	0.924528	0.95283	0.939189	-0.164002	0.164002	4.72955e-14	1.34303e-11
SRSF3_GM	SLC15A3	5	11:60708594-60708762	4:6	0.605072	0.594595	0.643564	0.434579	0.491453	0.428571	0.449848	0.162859	0.162859	4.88868e-10	7.48798e-08
SRSF3_GM	C4orf29	5	4:128922871-128922915	4:6	0.323529	0.485714	0.347826	0.24	0.0571429	0.192308	0.177778	0.162783	0.162783	0.000185667	0.00716392
SRSF3_GM	CASK	20	X:41414853-41414888	19:21	0.169231	0.142857	0.210526	0.291667	0.354839	0.545455	0.307692	-0.162035	0.162035	0.000162702	0.00644383
SRSF3_GM	ZNF638	3	2:71575557-71577401	2:4	0.802817	0.733333	0.764706	0.942308	0.853333	0.939394	0.913462	-0.161722	0.161722	3.52153e-05	0.00177644
SRSF3_GM	PLSCR3	6	17:7296463-7296683	5:7	0.45641	0.307229	0.313953	0.521739	0.488235	0.460993	0.461929	-0.161129	0.161129	4.91408e-05	0.00237464
SRSF3_GM	RFWD2	7	1:176105624-176105683	6:8	0.53125	0.572327	0.567308	0.701613	0.675978	0.76378	0.755102	-0.16105	0.16105	0.000318422	0.0110291
SRSF3_GM	GANC	18	15:42621504-42621647	17:19	1	0.807692	0.76	1	0.924528	0.977778	0.958904	-0.160649	0.160649	0.000206934	0.00783244
SRSF3_GM	MEI1	34	22:42180612-42180787	33:35	0.625	0.617021	0.533333	0.873418	0.741573	0.813333	0.691358	-0.160432	0.160432	2.58679e-05	0.00137057
SRSF3_GM	C22orf39	25	22:19344413-19344574	24:26	0.840426	0.809524	0.939394	1	1	1	0.980952	-0.159574	0.159574	3.55638e-12	7.24841e-10
SRSF3_GM	HIRA	24	22:19344413-19344574	23:25	0.840426	0.809524	0.939394	1	1	1	0.980952	-0.159574	0.159574	3.55638e-12	7.24841e-10
SRSF3_GM	TMEM11	3	17:21114249-21114540	1:4	0.215909	0.190476	0.181818	0.329114	0.297872	0.375	0.37069	-0.159426	0.159426	0.000181881	0.00703931
SRSF3_GM	ADPRH	2	3:119299398-119299483	1:3	0.490566	0.476744	0.424242	0.643564	0.604651	0.627451	0.656863	-0.158763	0.158763	9.94721e-06	0.000607236
SRSF3_GM	SEC31A	30	4:83752090-83752128	29:31	0.196552	0.202532	0.239583	0.0284698	0.0792079	0.034749	0.0537084	0.158303	0.158303	3.8513e-10	5.9714e-08
SRSF3_GM	SLC9A7	13	X:46495024-46495083	12:14	0.768	0.697674	0.75	0.91358	0.901786	0.848837	0.945455	-0.157683	0.157683	5.3644e-08	5.53365e-06
SRSF3_GM	PKM2	14	15:72494795-72494961	13:15	0.766752	0.722395	0.751734	0.910164	0.907411	0.904921	0.91151	-0.157053	0.157053	6.66134e-16	2.21516e-13
SRSF3_GM	C5orf44	8	5:64951463-64951480	7:9	0.847826	0.816901	0.815789	0.725806	0.621622	0.625	0.697368	0.155717	0.155717	0.000274141	0.00989767
SRSF3_GM	CDC2L6	15	6:110942307-110942573	14:16	0.883333	0.844444	0.785714	1	1	1	1	-0.155556	0.155556	2.67987e-10	4.34157e-08
SRSF3_GM	PPHLN1	5	12:42745687-42745851	4:6	0.617801	0.648045	0.573123	0.454545	0.514507	0.459155	0.465696	0.155375	0.155375	4.81272e-05	0.00233458
SRSF3_GM	MOSPD1	5	X:134025509-134025670	4:6	0.361702	0.311475	0.264706	0.473684	0.42	0.580645	0.46	-0.155367	0.155367	0.00207189	0.0474302
SRSF3_GM	TBX15	8	1:119433490-119433588	7:9	0.3	0.354167	0.263158	0.128205	0.203125	0.129032	0.16092	0.155024	0.155024	0.000715196	0.0212386
SRSF3_GM	SRPK2	19	7:104766695-104766787	18:20	0.793814	0.816667	0.867925	0.652778	0.62963	0.671053	0.697248	0.154751	0.154751	5.12462e-06	0.00034354
SRSF3_GM	ZBTB38	8	3:141115101-141115345	7:9	0.217391	0.128205	0.111111	0.282609	0.272727	0.283019	0.4	-0.154609	0.154609	0.00191534	0.0446965
SRSF3_GM	TP73	13	1:3646564-3646712	12:14	0.776316	0.813953	0.6875	0.934783	0.925926	0.972222	0.91358	-0.154038	0.154038	0.00036692	0.0125144
SRSF3_GM	ILF3	18	19:10795092-10795152	17:19	0.729469	0.762712	0.690909	0.573864	0.577061	0.531773	0.596591	0.154006	0.154006	8.55307e-05	0.00373982
SRSF3_GM	SLCO5A1	7	8:70650275-70650439	6:8	0.73913	0.673913	0.761905	1	0.809524	0.939394	0.846154	-0.153643	0.153643	0.000822977	0.0236892
SRSF3_GM	C22orf13	6	22:24939810-24940051	5:7	0.802589	0.697368	0.817568	0.959677	0.952532	0.941606	0.967836	-0.153516	0.153516	0	0
SRSF3_GM	C3orf17	2	3:112736295-112736449	1:3	0.519824	0.540541	0.644068	0.695364	0.692641	0.697531	0.651261	-0.153462	0.153462	2.60897e-05	0.00137654
SRSF3_GM	PCM1	32	8:17863772-17863906	31:33	0.875	0.839378	0.802817	0.993671	0.995434	0.991071	0.966049	-0.152993	0.152993	1.27787e-13	3.32944e-11
SRSF3_GM	RBL2	19	16:53503828-53504097	18:20	0.880597	0.847458	0.714286	1	1	1	1	-0.152542	0.152542	2.55351e-15	8.16898e-13
SRSF3_GM	PGAP2	13	11:3846026-3846358	12:14	0.925	0.847458	0.83871	0.9875	1	1	1	-0.152542	0.152542	6.00118e-10	8.97443e-08
SRSF3_GM	RP11-357L2.1	2	2:160758876-160760116	1:3	0.332724	0.325137	0.285024	0.177778	0.166189	0.16791	0.17801	0.152292	0.152292	3.62198e-06	0.000254273
SRSF3_GM	LY75	2	2:160758876-160760116	1:3	0.332724	0.325137	0.285024	0.177778	0.166189	0.16791	0.17801	0.152292	0.152292	3.62198e-06	0.000254273
SRSF3_GM	GSK3A	9	19:42736648-42736834	8:10	0.844	0.853659	0.814815	1	0.990991	0.987903	1	-0.151495	0.151495	0	0
SRSF3_GM	HERPUD2	7	7:35674745-35675068	6:8	0.833333	0.79661	0.807692	0.96875	1	0.924731	0.949045	-0.151205	0.151205	4.45224e-08	4.70802e-06
SRSF3_GM	UPP1	5	7:48139267-48139384	4:6	0.860465	0.818182	0.827586	0.957447	0.983871	0.973684	1	-0.151191	0.151191	5.35163e-06	0.000355926
SRSF3_GM	B4GALT4	4	3:118953992-118954074	3:5	0.37931	0.372881	0.42	0.228916	0.285714	0.2	0.227642	0.151031	0.151031	0.000133267	0.00539795
SRSF3_GM	STAP2	14	19:4324452-4324664	13:15	0.724638	0.666667	0.851852	0.890411	0.841463	0.882353	0.868421	-0.150749	0.150749	0.00174928	0.0415205
SRSF3_GM	SPIB	4	19:50926080-50926294	3:5	0.839216	0.815068	0.789474	0.973231	0.962109	0.954874	0.966387	-0.149179	0.149179	0	0
SRSF3_GM	RIF1	32	2:152324988-152325065	31:33	0.707071	0.758929	0.843137	0.584906	0.634615	0.574468	0.647059	0.149168	0.149168	8.32266e-06	0.000521932
SRSF3_GM	FAM21A	28	10:51886920-51886982	27:29	0.807229	0.835165	0.822222	0.965116	0.977444	0.921739	0.983516	-0.149058	0.149058	7.94562e-08	7.93714e-06
SRSF3_GM	SLC37A4	10	11:118896402-118896467	9:11	0.148936	0.12987	0.3	0	0	0.0277778	0	0.148936	0.148936	4.16259e-09	5.31319e-07
SRSF3_GM	PISD	8	22:32019670-32019835	7:9	0.78481	0.764706	0.851852	0.915254	0.951613	0.983333	0.909091	-0.148623	0.148623	1.84429e-05	0.00102894
SRSF3_GM	GNB1L	3	22:19833662-19840009	2:4	0.0638298	0.0526316	0.0238095	0.196429	0.15942	0.272727	0.205128	-0.148147	0.148147	1.1262e-07	1.09471e-05
SRSF3_GM	PARM1	2	4:75937635-75938360	1:3	0.975	0.813953	0.852941	0.980769	1	1	1	-0.147059	0.147059	3.54661e-07	3.14504e-05
SRSF3_GM	UBP1	8	3:33450182-33450289	7:9	0.60221	0.543624	0.561983	0.403614	0.467456	0.325153	0.427386	0.146483	0.146483	0.000115608	0.00476717
SRSF3_GM	CASC4	11	15:44695085-44695387	10:13	0.744479	0.679128	0.760234	0.583673	0.614334	0.575092	0.612813	0.146236	0.146236	1.78502e-09	2.45178e-07
SRSF3_GM	C9orf156	5	9:100673200-100675257	4:6	0.297297	0.363636	0.235294	0.0789474	0.157895	0.153846	0.15	0.145374	0.145374	0.000988188	0.0271249
SRSF3_GM	ZNF33A	5	10:38323254-38323328	4:7	0.135135	0.1875	0.205128	0.0416667	0.0428571	0.107143	0.0291262	0.145238	0.145238	1.2829e-05	0.000747068
SRSF3_GM	BCL2L12	3	19:50170276-50170418	2:4	0.769565	0.767606	0.813008	0.911197	0.918149	0.918367	0.907534	-0.145108	0.145108	2.42526e-07	2.22886e-05
SRSF3_GM	LTB	2	6:31549591-31549636	1:3	0.731501	0.757692	0.740088	0.581152	0.598592	0.603306	0.591973	0.144806	0.144806	9.28104e-05	0.00398533
SRSF3_GM	XPR1	11	1:180805658-180805852	10:12	0.663265	0.807692	0.810345	0.97561	0.951613	0.931818	0.953125	-0.144677	0.144677	5.67657e-13	1.33935e-10
SRSF3_GM	COL4A3BP	12	5:74695135-74695212	11:13	0.261628	0.271523	0.280992	0.148936	0.140449	0.113772	0.0813953	0.144412	0.144412	2.88249e-07	2.62047e-05
SRSF3_GM	CD46	13	1:207963598-207963690	12:14	0.417957	0.424837	0.380952	0.232877	0.287383	0.260504	0.296675	0.144013	0.144013	1.19238e-05	0.000699188
SRSF3_GM	MYCBP2	56	13:77692475-77692654	55:57	0.0743243	0.0714286	0.0588235	0.208333	0.219048	0.233871	0.211268	-0.143729	0.143729	0.00182462	0.0430566
SRSF3_GM	MYST2	7	17:47886481-47886570	6:8	0.690476	0.69	0.723404	0.77907	0.899083	0.804124	0.862637	-0.142904	0.142904	0.00160125	0.0388208
SRSF3_GM	ZDHHC24	2	11:66311175-66311452	1:3	0.923077	0.857143	0.774194	1	1	1	0.972222	-0.142857	0.142857	1.26876e-08	1.45092e-06
SRSF3_GM	CDCA3	2	12:6959997-6960173	1:3	0.893617	0.857143	0.8125	1	0.981982	1	1	-0.142857	0.142857	3.44169e-15	1.07385e-12
SRSF3_GM	ASB1	3	2:239344352-239344654	2:4	0.784091	0.742424	0.756098	0.8625	0.885246	0.964912	0.9125	-0.142775	0.142775	9.15177e-05	0.00394697
SRSF3_GM	CLN6	4	15:68504013-68504201	3:5	0.950495	0.826087	0.854167	1	1	0.993289	0.985222	-0.142478	0.142478	4.05231e-14	1.1638e-11
SRSF3_GM	STAT6	5	12:57501388-57501526	4:6	0.646914	0.601504	0.689655	0.789298	0.788804	0.801187	0.766739	-0.142137	0.142137	4.78728e-13	1.15228e-10
SRSF3_GM	MRRF	2	9:125027741-125028059	1:3	0.304348	0.430769	0.27907	0.181818	0.142857	0.132353	0.186047	0.14201	0.14201	0.000347716	0.01194
SRSF3_GM	PARD3	14	10:34661426-34661464	13:15	0.633188	0.611872	0.670103	0.452555	0.530516	0.451807	0.531646	0.141652	0.141652	4.2588e-07	3.72432e-05
SRSF3_GM	RAG1AP1	3	1:155109304-155109427	2:4	0.624277	0.689189	0.6875	0.573684	0.509434	0.541096	0.55122	0.141342	0.141342	2.83204e-05	0.00148122
SRSF3_GM	SH3GLB2	7	9:131772949-131772972	6:8	0.845588	0.854839	0.802817	0.985185	0.988304	0.985401	0.99375	-0.141265	0.141265	0	0
SRSF3_GM	OFD1	21	X:13781864-13781974	20:22	0.538462	0.579832	0.533333	0.651163	0.74	0.705426	0.625641	-0.139833	0.139833	7.72178e-05	0.00344792
SRSF3_GM	RHBDD2	2	7:75510683-75510804	1:3	0.142857	0.12931	0.2	0.252427	0.315315	0.282828	0.281818	-0.139466	0.139466	1.9901e-05	0.00110721
SRSF3_GM	P2RY10	2	X:78203312-78203360	1:3	0.543672	0.575601	0.525862	0.394595	0.423935	0.327434	0.414258	0.139246	0.139246	1.15679e-06	9.37035e-05
SRSF3_GM	SPNS1	11	16:28995107-28995278	10:12	0.941748	0.942857	0.918919	0.802817	0.84	0.792683	0.802198	0.13924	0.13924	8.74802e-06	0.000543215
SRSF3_GM	ARAP1	15	11:72415197-72415379	14:17	0.807018	0.7125	0.854167	0.925926	0.946429	0.944444	0.959538	-0.138419	0.138419	7.69343e-05	0.00344134
SRSF3_GM	TMEM48	2	1:54301173-54301293	1:3	0.685714	0.615385	0.714286	0.837209	0.893805	0.809524	0.809091	-0.137652	0.137652	7.83962e-07	6.58242e-05
SRSF3_GM	MUM1	5	19:1358587-1358699	4:6	0.352273	0.337838	0.25	0.222222	0.164835	0.209877	0.190909	0.137445	0.137445	0.00154397	0.037958
SRSF3_GM	NUPL2	7	7:23236792-23236849	6:8	0.216667	0.181818	0.209302	0.079646	0.072	0.0677966	0.0718954	0.137355	0.137355	3.50128e-08	3.76544e-06
SRSF3_GM	MTIF3	5	13:28015154-28015214	4:6	0.241071	0.293233	0.16129	0.121951	0.145455	0.0860215	0.0701754	0.137085	0.137085	7.18099e-06	0.000462973
SRSF3_GM	ATP5J2	3	7:99056770-99056886	2:4	0.793404	0.813131	0.772369	0.93261	0.936306	0.928212	0.917864	-0.137007	0.137007	8.2142e-10	1.17287e-07
SRSF3_GM	PTCD1	3	7:99056770-99056886	2:4	0.793404	0.813131	0.772369	0.93261	0.936306	0.928212	0.917864	-0.137007	0.137007	8.2142e-10	1.17287e-07
SRSF3_GM	RP5-900K19.1	3	7:99056770-99056886	2:4	0.793404	0.813131	0.772369	0.93261	0.936306	0.928212	0.917864	-0.137007	0.137007	8.2142e-10	1.17287e-07
SRSF3_GM	GBA2	5	9:35741669-35741905	4:6	0.613636	0.827586	0.769231	0.931818	0.869565	0.880597	0.939394	-0.136977	0.136977	0.000105883	0.0044674
SRSF3_GM	PIGF	2	2:46842076-46842324	1:3	0.813725	0.839623	0.631579	0.961039	0.904348	0.939759	0.972727	-0.136674	0.136674	3.38354e-07	3.04314e-05
SRSF3_GM	ZW10	7	11:113628384-113628575	6:8	0.871429	0.805195	0.803922	0.931034	0.952381	0.971831	0.931034	-0.136513	0.136513	5.28728e-06	0.000352574
SRSF3_GM	STK40	2	1:36833449-36833685	1:3	0.118557	0.133929	0.16	0.279279	0.25641	0.30597	0.261538	-0.13648	0.13648	2.51223e-05	0.00133667
SRSF3_GM	HMGB1	7	13:31035776-31035825	6:8	0.12	0.2	0.176471	0.037037	0.0777778	0.028169	0.0430108	0.136447	0.136447	3.71649e-06	0.000259466
SRSF3_GM	TLR10	3	4:38777396-38777584	2:4	0.871287	0.897959	0.883333	0.762887	0.75	0.743902	0.706667	0.136382	0.136382	1.04644e-06	8.5312e-05
SRSF3_GM	PRDM4	5	12:108145192-108145986	4:6	0.860465	1	0.863636	1	0.977778	1	1	-0.136364	0.136364	0.000410922	0.0136648
SRSF3_GM	UPF3A	4	13:115051777-115051875	3:5	0.605911	0.713235	0.597938	0.463235	0.478261	0.403727	0.495833	0.135163	0.135163	8.01797e-09	9.51353e-07
SRSF3_GM	FAM60A	3	12:31457916-31458066	2:4	0.691011	0.785276	0.808081	0.613139	0.689655	0.590164	0.687861	0.134776	0.134776	2.90553e-05	0.00151405
SRSF3_GM	CHEK1	4	11:125497502-125497725	3:5	0.703488	0.788462	0.727273	0.866667	0.825641	0.857143	0.876777	-0.134632	0.134632	2.77241e-06	0.000202506
SRSF3_GM	USP28	21	11:113677211-113677306	20:22	0.15625	0.214286	0.129032	0.0243902	0.0491803	0.0196078	0.012987	0.134251	0.134251	2.35901e-06	0.000179576
SRSF3_GM	MAP3K3	3	17:61712069-61712161	2:4	0.183673	0.255814	0.269231	0.307692	0.537037	0.307692	0.47191	-0.133987	0.133987	0.000742116	0.0217834
SRSF3_GM	TNIK	15	3:170857259-170857345	14:16	0.186047	0.120879	0.222222	0.0526316	0.0517241	0.0504202	0.0862069	0.133869	0.133869	0.000559409	0.0174327
SRSF3_GM	SEC14L2	17	22:30823158-30823390	16:18	0.834835	0.761566	0.793103	0.91875	0.935135	0.913793	0.943218	-0.133839	0.133839	5.98108e-10	8.97443e-08
SRSF3_GM	MTFP1	3	22:30823158-30823390	2:4	0.834835	0.761566	0.793103	0.91875	0.935135	0.913793	0.943218	-0.133839	0.133839	5.98108e-10	8.97443e-08
SRSF3_GM	RP4-539M6.19	15	22:30823158-30823390	14:16	0.834835	0.761566	0.793103	0.91875	0.935135	0.913793	0.943218	-0.133839	0.133839	5.98108e-10	8.97443e-08
SRSF3_GM	PRKACB	15	1:84670162-84671121	14:16	0.193548	0.233333	0.119048	0.0759494	0.0869565	0.025	0.0438596	0.133644	0.133644	3.96915e-05	0.00197854
SRSF3_GM	FDXACB1	4	11:111749280-111749436	3:5	0.944444	0.965517	0.913043	0.717949	0.857143	0.764706	0.883721	0.13352	0.13352	0.000809511	0.0233815
SRSF3_GM	POLL	6	10:103344359-103344676	5:7	0.8	0.866667	1	1	1	1	0.942857	-0.133333	0.133333	0.00211345	0.0479773
SRSF3_GM	METTL1	3	12:58163555-58163739	2:4	0.837209	0.789474	0.793103	0.93617	0.913793	0.915254	0.938462	-0.132609	0.132609	0.00174782	0.0415205
SRSF3_GM	SNX14	28	6:86223788-86223952	27:29	0.82266	0.79386	0.813008	0.94702	0.986784	0.924528	0.941176	-0.13109	0.13109	2.72318e-10	4.38362e-08
SRSF3_GM	CHCHD10	2	22:24109561-24109780	1:3	0.863014	0.840909	0.904762	1	0.987805	0.982759	1	-0.130889	0.130889	8.44551e-06	0.000527021
SRSF3_GM	LRRC28	10	15:99903311-99903470	9:11	0.677778	0.6	0.645833	0.756303	0.821705	0.722222	0.796748	-0.130692	0.130692	7.32497e-05	0.003323
SRSF3_GM	SP140	39	2:231254634-231254738	38:40	0.913793	0.854167	0.962963	0.759259	0.777778	0.873016	0.79	0.129904	0.129904	0.00190231	0.044456
SRSF3_GM	SP140L	12	2:231254634-231254738	11:13	0.913793	0.854167	0.962963	0.759259	0.777778	0.873016	0.79	0.129904	0.129904	0.00190231	0.044456
SRSF3_GM	CNOT2	9	12:70724067-70724249	8:10	0.851852	0.853846	0.888889	0.987013	0.968085	0.993056	0.980198	-0.129759	0.129759	4.29989e-13	1.04492e-10
SRSF3_GM	LDLR	5	19:11215896-11216276	4:6	0.722222	0.737705	0.764706	0.648352	0.61	0.606383	0.57971	0.129513	0.129513	0.00210692	0.0478851
SRSF3_GM	SLC12A8	17	3:124807154-124807214	16:18	0.850649	0.775362	0.871429	0.982533	0.977273	0.947826	0.983264	-0.129253	0.129253	1.13176e-11	2.20023e-09
SRSF3_GM	ZMYM6	11	1:35476359-35476637	10:12	0.710526	0.870968	0.952381	1	1	1	1	-0.129032	0.129032	3.51229e-09	4.52889e-07
SRSF3_GM	C12orf35	4	12:32133812-32138891	3:5	0.795082	0.875	0.844828	0.982143	0.9125	0.967213	0.980198	-0.128878	0.128878	5.99276e-07	5.16911e-05
SRSF3_GM	DHX58	9	17:40257754-40258007	8:10	0.833333	0.909091	NA	1	1	1	0.935484	-0.128788	0.128788	0.00122357	0.0321115
SRSF3_GM	GIPC1	4	19:14593501-14593818	3:5	0.807692	0.793103	0.787879	0.866667	0.944444	0.954545	0.898305	-0.128271	0.128271	0.000876988	0.0248477
SRSF3_GM	SMARCD1	5	12:50481146-50481268	4:6	0.826255	0.785388	0.902913	0.688889	0.707819	0.73399	0.645833	0.127901	0.127901	1.67441e-10	2.79484e-08
SRSF3_GM	WDR13	6	X:48458707-48459014	5:7	0.87218	0.85	0.875	1	1	1	1	-0.12782	0.12782	0	0
SRSF3_GM	AKAP11	7	13:42871184-42871318	6:8	0.735849	0.745455	0.818182	0.895833	1	0.85	0.849315	-0.127462	0.127462	0.00142974	0.0359864
SRSF3_GM	NUPL1	4	13:25887021-25887170	3:5	0.887755	0.872727	0.806452	1	1	1	0.990826	-0.127273	0.127273	6.71685e-14	1.84516e-11
SRSF3_GM	ARHGEF12	6	11:120280103-120280159	5:7	0.280374	0.298701	0.210526	0.115942	0.120482	0.189655	0.186047	0.12711	0.12711	0.00155902	0.0380687
SRSF3_GM	MRI1	3	19:13876768-13876943	2:4	1	0.888889	NA	0.785714	0.903226	0.666667	0.85	0.126587	0.126587	0.00202633	0.0467258
SRSF3_GM	KIAA1712	11	4:175237681-175237718	10:12	0.783784	0.735294	0.774194	0.823529	1	0.870968	0.930233	-0.126407	0.126407	0.00144277	0.0360823
SRSF3_GM	CENPI	10	X:100381698-100381787	9:11	0.869565	0.875	0.875	1	1	0.942857	1	-0.125	0.125	0.00193274	0.045061
SRSF3_GM	ATG2B	8	14:96800025-96800210	7:9	0.875	1	0.846154	1	1	1	1	-0.125	0.125	0.00212388	0.0481407
SRSF3_GM	RP11-658F2.1	6	11:66410921-66411611	5:7	0.559229	0.557292	0.556995	0.689003	0.675414	0.691358	0.661064	-0.124917	0.124917	4.44089e-16	1.55881e-13
SRSF3_GM	RBM14	6	11:66410921-66411611	5:7	0.559229	0.557292	0.556995	0.689003	0.675414	0.691358	0.661064	-0.124917	0.124917	4.44089e-16	1.55881e-13
SRSF3_GM	RBM4	3	11:66410921-66411611	2:4	0.559229	0.557292	0.556995	0.689003	0.675414	0.691358	0.661064	-0.124917	0.124917	4.44089e-16	1.55881e-13
SRSF3_GM	METTL14	10	4:119626766-119626976	9:11	0.690476	0.732558	0.782609	0.867647	0.843137	0.91358	0.847059	-0.124795	0.124795	0.000110421	0.00460507
SRSF3_GM	MOV10	3	1:113229588-113229728	2:4	0.123457	0.213115	0.222222	0.097561	0.0827068	0.0680272	0.0947368	0.124393	0.124393	0.00112242	0.0300717
SRSF3_GM	ARID4A	22	14:58832742-58832948	21:23	0.818182	0.875	0.866667	1	1	0.977273	0.981132	-0.123899	0.123899	0.000187402	0.00721983
SRSF3_GM	RP4-604K5.1	4	1:87333736-87333785	3:5	0.796624	0.825778	0.810282	0.951904	0.935888	0.931555	0.925898	-0.12344	0.12344	1.11022e-16	4.52559e-14
SRSF3_GM	MAP3K7	12	6:91254271-91254351	11:13	0.133333	0.0932203	0.205479	0.254545	0.257143	0.267123	0.22293	-0.122511	0.122511	0.000115628	0.00476717
SRSF3_GM	PTPRC	7	1:198671516-198671659	6:8	0.369444	0.337705	0.335135	0.468227	0.451372	0.472303	0.451493	-0.122155	0.122155	4.6615e-08	4.86819e-06
SRSF3_GM	DDX42	2	17:61852468-61852538	1:3	0.251282	0.244755	0.154762	0.107345	0.143443	0.12037	0.126154	0.121493	0.121493	9.87686e-06	0.000605869
SRSF3_GM	RPP30	9	10:92655211-92655240	8:10	0.779412	0.79558	0.836207	0.922222	0.936275	0.911765	0.877273	-0.121413	0.121413	5.92311e-08	5.98779e-06
SRSF3_GM	TNIK	22	3:170824972-170824995	21:23	0.197605	0.204545	0.101449	0.075	0.0774194	0.0833333	0.0478088	0.121395	0.121395	0.000311269	0.0108806
SRSF3_GM	SGSM3	7	22:40801145-40801288	6:8	0.828829	0.808824	0.84375	0.943662	0.940594	0.956522	0.971698	-0.121263	0.121263	1.33821e-06	0.000106021
SRSF3_GM	PIGT	9	20:44050023-44050223	8:10	0.922156	0.833333	0.863014	0.989247	0.975369	0.980952	0.986547	-0.120736	0.120736	3.88225e-11	7.05871e-09
SRSF3_GM	SLC12A2	21	5:127512797-127512844	20:22	0.805405	0.816667	0.780488	0.947761	0.926702	0.917808	0.92549	-0.12069	0.12069	3.80224e-10	5.93173e-08
SRSF3_GM	AP2M1	6	3:183898297-183898438	5:7	0.689861	0.657317	0.643494	0.50875	0.535782	0.539627	0.537553	0.12065	0.12065	0	0
SRSF3_GM	CHTF18	16	16:845132-845356	15:17	0.916667	0.842105	NA	1	1	1	0.97619	-0.120614	0.120614	3.14574e-05	0.00162581
SRSF3_GM	PPP2R1B	16	11:111608605-111612336	15:17	0.798246	0.780142	0.83871	0.87156	0.938596	0.912621	0.924812	-0.120471	0.120471	2.74724e-05	0.00144347
SRSF3_GM	STXBP5	20	6:147646095-147646220	19:21	1	0.88	0.833333	1	1	1	1	-0.12	0.12	0.000386872	0.013054
SRSF3_GM	ATP6V0A2	20	12:124241362-124241533	19:21	0.860465	0.893805	0.852459	0.987013	0.965517	0.973684	0.989899	-0.119883	0.119883	2.82459e-08	3.0702e-06
SRSF3_GM	KIAA1310	21	2:97272707-97272784	20:22	0.15625	0.242424	0.15625	0.0746269	0.030303	0.0357143	0.0380952	0.119345	0.119345	3.1036e-06	0.000224106
SRSF3_GM	DDHD1	13	14:53518562-53518645	12:14	0.570588	0.520548	0.610526	0.680328	0.697531	0.630631	0.735484	-0.118341	0.118341	0.000168201	0.00661112
SRSF3_GM	LIN54	6	4:83867411-83867627	5:7	0.938776	0.882353	0.857143	0.9375	1	1	1	-0.117647	0.117647	0.000274928	0.0099119
SRSF3_GM	IL6ST	9	5:55255454-55255499	8:10	0.136364	0.21875	0.244444	0.0983607	0.142857	0.0684932	0.103896	0.117622	0.117622	0.00169143	0.0405959
SRSF3_GM	ITM2C	2	2:231738132-231738272	1:3	0.703678	0.727273	0.753906	0.831799	0.857978	0.84184	0.84587	-0.116583	0.116583	0.00130396	0.0335934
SRSF3_GM	ZMYM5	2	13:20436539-20436606	1:3	0.948718	0.956522	1	0.787879	0.813953	0.931034	0.867925	0.115583	0.115583	0.000406797	0.0135585
SRSF3_GM	MCTP1	21	5:94134718-94134837	19:23	0.967742	1	0.976744	0.926829	0.885714	0.836735	0.788732	0.11552	0.11552	3.58484e-06	0.000253071
SRSF3_GM	UBR5	39	8:103297741-103298005	38:40	0.84	0.877246	0.901163	0.983051	0.997151	0.994135	0.991379	-0.115512	0.115512	0	0
SRSF3_GM	SPAST	4	2:32323865-32323960	3:5	0.931034	0.837838	0.755556	0.923077	0.947368	0.958333	0.970588	-0.115013	0.115013	4.67321e-05	0.00228004
SRSF3_GM	NAE1	2	16:66861883-66861980	1:3	0.255474	0.185714	0.307692	0.161765	0.155172	0.114094	0.125786	0.114995	0.114995	5.90481e-05	0.00276869
SRSF3_GM	R3HDM1	18	2:136409300-136409602	17:19	0.914062	0.885057	0.833333	1	1	1	1	-0.114943	0.114943	2.29455e-11	4.32763e-09
SRSF3_GM	DIS3	3	13:73354984-73355141	2:4	0.523364	0.570552	0.622807	0.669014	0.717703	0.62069	0.701493	-0.114701	0.114701	0.00019452	0.00747127
SRSF3_GM	OS9	13	12:58113882-58114046	12:14	0.571429	0.534483	0.634441	0.468124	0.406639	0.480409	0.446172	0.114281	0.114281	1.11022e-16	4.52559e-14
SRSF3_GM	DNAJC11	13	1:6699962-6700117	12:14	0.96063	0.846154	0.852941	0.958678	0.966443	0.968	0.967742	-0.114151	0.114151	3.27882e-05	0.00167405
SRSF3_GM	MBNL2	8	13:98009050-98009103	7:9	0.12	0.12766	0.25	0.0285714	0	0	0.0545455	0.113374	0.113374	0.000264074	0.00957523
SRSF3_GM	ASB2	6	14:94419698-94419853	5:7	0.808244	0.779762	0.778302	0.913851	0.892216	0.892336	0.872408	-0.112514	0.112514	4.30394e-06	0.000294779
SRSF3_GM	C4orf29	12	4:128942292-128942393	11:13	0.976744	0.944444	1	0.961538	0.818182	0.886364	0.842105	0.11251	0.11251	0.00170925	0.0409458
SRSF3_GM	HNRNPA2B1	2	7:26237451-26237486	1:3	0.272325	0.287188	0.259948	0.158141	0.159161	0.161681	0.162586	0.111904	0.111904	1.41951e-09	1.98206e-07
SRSF3_GM	C1orf107	12	1:210016796-210017041	11:13	0.777778	0.892857	0.85	0.977273	1	0.928571	0.946429	-0.111851	0.111851	0.000510547	0.0160886
SRSF3_GM	TM9SF1	4	14:24661377-24661562	3:5	0.842593	0.923913	0.820513	0.945652	0.955357	0.952941	0.972222	-0.111557	0.111557	6.04241e-05	0.00281752
SRSF3_GM	ELK1	2	X:47509320-47509425	1:3	0.201413	0.171717	0.197917	0.306604	0.310606	0.360731	0.308017	-0.111395	0.111395	0.000749856	0.0219088
SRSF3_GM	PHF3	6	6:64394030-64395812	5:7	0.859375	0.8125	0.8125	0.873418	0.916667	0.932039	0.929936	-0.110801	0.110801	0.000736888	0.0217342
SRSF3_GM	RAD51AP1	11	12:4665519-4665716	10:12	0.825581	0.746988	0.859375	0.961538	0.954955	0.917647	0.872727	-0.11072	0.11072	1.99336e-05	0.00110721
SRSF3_GM	NGLY1	13	3:25761505-25761682	12:14	0.945455	0.882022	0.884615	0.79562	0.757895	0.79021	0.753695	0.110563	0.110563	1.96343e-08	2.18598e-06
SRSF3_GM	KIAA1191	2	5:175786814-175786921	1:3	0.852564	0.928571	0.847222	0.969697	0.95625	0.99115	0.938356	-0.110409	0.110409	9.37954e-07	7.7467e-05
SRSF3_GM	WDR44	16	X:117570665-117570787	14:17	0.833333	0.87931	0.941176	0.9375	0.979167	1	1	-0.110273	0.110273	0.000259922	0.00947908
SRSF3_GM	MAX	2	14:65568264-65568290	1:3	0.677551	0.616505	0.576	0.52093	0.483755	0.501931	0.51087	0.110105	0.110105	4.02314e-06	0.000277049
SRSF3_GM	SKA3	2	13:21746759-21746827	1:3	0.974359	0.972973	0.952381	0.891304	0.836735	0.764706	0.901639	0.108953	0.108953	0.00215205	0.0487355
SRSF3_GM	AICDA	4	12:8757403-8757518	3:5	0.85625	0.853372	0.794872	0.959119	0.965368	0.951673	0.966667	-0.108871	0.108871	3.1708e-13	7.85643e-11
SRSF3_GM	PREPL	3	2:44586636-44587177	2:4	0.256881	0.366667	0.354839	0.478873	0.448276	0.445783	0.508929	-0.108736	0.108736	0.00024105	0.00884187
SRSF3_GM	KTELC1	5	3:119197181-119197321	4:6	0.181818	0.142857	0.105263	0.0344828	0.0338983	0.0172414	0.0416667	0.108667	0.108667	0.000769714	0.0224113
SRSF3_GM	ALS2CR8	18	2:203846795-203847164	17:19	0.909091	0.875	NA	1	1	1	1	-0.107955	0.107955	0.00013522	0.00545914
SRSF3_GM	CACNB4	12	2:152725691-152725749	11:13	1	1	1	0.954545	0.875	0.782609	0.909091	0.107955	0.107955	0.00154844	0.0380309
SRSF3_GM	PPP3CC	14	8:22396982-22397011	13:15	0.808874	0.824176	0.81875	0.684015	0.726415	0.695473	0.735016	0.107806	0.107806	6.54741e-08	6.59254e-06
SRSF3_GM	CDC27	3	17:45249283-45249430	2:4	0.747368	0.78125	0.717241	0.841202	0.846416	0.878261	0.863636	-0.107658	0.107658	2.73062e-08	2.98749e-06
SRSF3_GM	ATP6V0A1	21	17:40666307-40666478	20:23	0.802721	0.725	0.781818	0.883117	0.940476	0.892157	0.886179	-0.10735	0.10735	3.19592e-06	0.000229462
SRSF3_GM	TOM1L2	15	17:17761083-17761169	14:16	0.107143	0.172414	0.0833333	0	0.0689655	0	0	0.107143	0.107143	0.0012965	0.033496
SRSF3_GM	BCL2L13	7	22:18178907-18178976	6:8	0.927273	0.948529	0.939759	0.834646	0.831325	0.933333	0.819876	0.106774	0.106774	1.72216e-05	0.000971522
SRSF3_GM	DPAGT1	7	11:118968565-118968753	6:8	0.851064	0.714286	0.894737	0.953488	0.962025	0.934783	0.982456	-0.106693	0.106693	1.72913e-06	0.000134462
SRSF3_GM	DEPDC5	43	22:32293468-32293639	42:44	0.931034	0.857143	NA	0.904762	1	1	1	-0.105911	0.105911	0.000712883	0.0211961
SRSF3_GM	RNF38	9	9:36356300-36356470	8:10	0.894118	0.816901	1	1	1	1	1	-0.105882	0.105882	7.26968e-10	1.062e-07
SRSF3_GM	KIAA0406	7	20:36625151-36625355	6:8	0.9	0.810811	0.857143	1	0.936508	0.938462	0.986486	-0.105331	0.105331	0.000678339	0.0203992
SRSF3_GM	ZMYM4	9	1:35835973-35836228	8:10	0.885714	0.852941	0.941176	0.962963	1	0.981481	1	-0.105026	0.105026	0.000394841	0.0132874
SRSF3_GM	ISCU	2	12:108957836-108957931	1:3	0.161235	0.176377	0.231111	0.0594463	0.0819672	0.0611621	0.0826389	0.104812	0.104812	3.02638e-11	5.62395e-09
SRSF3_GM	AKAP11	14	13:42891664-42891824	13:15	0.903509	0.850467	0.830189	0.96	0.956522	0.919355	0.953947	-0.104767	0.104767	4.11648e-05	0.00203592
SRSF3_GM	FAM13B	14	5:137292166-137292231	13:15	0.0657895	0.0175439	0	0.138462	0.105882	0.163934	0.0973451	-0.104628	0.104628	0.000222921	0.00830202
SRSF3_GM	MR1	5	1:181021371-181021646	4:6	0.376033	0.392344	0.294737	0.478261	0.433333	0.537313	0.479592	-0.102893	0.102893	0.00143382	0.0359864
SRSF3_GM	SLC37A2	13	11:124954130-124954215	12:14	0.869565	0.945946	0.8	0.98	1	0.964912	0.955224	-0.102891	0.102891	0.00200815	0.0464337
SRSF3_GM	PARP2	15	14:20825555-20825679	14:16	0.87069	0.912281	0.854839	0.97619	0.96875	0.970588	0.981818	-0.1027	0.1027	3.52351e-07	3.13555e-05
SRSF3_GM	ZDHHC16	6	10:99212652-99212680	5:7	0.831081	0.825397	0.837607	0.927419	0.937931	0.929577	0.942857	-0.102673	0.102673	3.87971e-05	0.00193779
SRSF3_GM	PDCD10	3	3:167443189-167443261	2:4	0.857143	0.897196	0.927273	0.805556	0.834395	0.783505	0.768786	0.102666	0.102666	0.00115163	0.0306693
SRSF3_GM	SUGT1	7	13:53235610-53235705	6:8	0.222437	0.221311	0.242902	0.32	0.32914	0.3531	0.307216	-0.102133	0.102133	1.95687e-09	2.65893e-07
SRSF3_GM	VPS53	6	17:565049-565135	4:7	0.927273	0.978723	0.947368	0.870968	0.836364	0.839286	0.851852	0.1018	0.1018	0.0020751	0.0474606
SRSF3_GM	BCL2L12	6	19:50173473-50173745	5:7	0.863095	0.82906	0.844156	0.956522	0.937198	0.929412	0.954082	-0.101484	0.101484	2.36121e-07	2.17791e-05
SRSF3_GM	HLA-DOA	3	6:32975088-32975369	2:4	0.939103	0.884211	0.868687	0.978723	0.992218	0.97479	0.992701	-0.10126	0.10126	5.37762e-09	6.55442e-07
SRSF3_GM	RWDD1	3	6:116895221-116895334	2:4	1	0.854167	0.888889	0.98	1	0.979592	1	-0.101111	0.101111	0.000707875	0.021072
SRSF3_GM	NAT15	7	16:3533363-3533602	6:8	0.868613	0.874016	0.913793	0.972727	0.961039	0.992063	0.977143	-0.100919	0.100919	3.84207e-08	4.09707e-06
SRSF3_GM	RPUSD3	8	3:9880716-9880855	7:9	0.824242	0.833333	0.873418	0.91875	0.931507	0.936508	0.940397	-0.100674	0.100674	0.000941664	0.0261237
SRSF3_GM	BMF	5	15:40396381-40396541	4:6	0.767442	0.724638	0.663866	0.82	0.830601	0.830508	0.812207	-0.100617	0.100617	7.83284e-06	0.000498638
SRSF3_GM	SP3	4	2:174819601-174820960	3:5	0.890411	0.911392	0.896104	0.991597	1	1	0.993333	-0.100563	0.100563	2.52576e-13	6.44782e-11
SRSF3_GM	EPT1	10	2:26609222-26609404	9:11	0.851351	0.857143	0.829787	0.915493	0.888889	1	0.988235	-0.100513	0.100513	9.78469e-05	0.00416311
SRSF3_GM	KIAA0125	4	14:106388400-106388502	3:5	0.907975	0.943262	0.957627	0.870968	0.879747	0.777027	0.815029	0.100264	0.100264	9.17292e-05	0.00394936
SRSF3_GM	CRYZ	8	1:75172787-75172888	7:9	0.936927	0.946841	0.946037	0.851351	0.840244	0.826162	0.874848	0.100239	0.100239	3.159e-11	5.82754e-09
SRSF3_GM	DBT	2	1:100714455-100714641	1:3	0.129032	0.159091	0.137931	0.0461538	0	0.0294118	0.0612245	0.100148	0.100148	0.000588561	0.0180518
	gene_symbol	exon_skipped	coordonnees	exons_flanquants	psi_HepG2_SRSF3	psi_HepG2_SRSF3	psi_HepG2_SF3B1	psi_HepG2_SF3B1				deltaPSI	valeur abs deltaPSI	pvalue_glm	pvalue_corrigee_glm
SRSF3_HepG2	C14orf153	23	14:104159890-104160290	22:24	0.26087	0.3125	1	1				-0.713315	0.713315	4.42812e-12	8.46559e-10
SRSF3_HepG2	C11orf30	7	11:76170977-76171129	6:8	0.323944	0.323529	0.788462	0.941176				-0.541082	0.541082	0	0
SRSF3_HepG2	NAV2	20	11:20071382-20071447	19:21	0.853659	0.86	0.372549	0.298246				0.521432	0.521432	2.29816e-14	6.48232e-12
SRSF3_HepG2	NUMB	11	14:73745989-73746132	10:12	0.097561	0.19403	0.684211	0.644068				-0.518344	0.518344	6.91669e-14	1.75294e-11
SRSF3_HepG2	MAGI1	15	3:65433697-65433732	14:16	0.952381	0.9	0.388889	0.4375				0.512996	0.512996	5.24604e-08	5.1446e-06
SRSF3_HepG2	SORBS1	12	10:97173820-97174619	10:13	0.173077	0.157895	0.65	0.65				-0.484514	0.484514	5.7464e-12	1.07188e-09
SRSF3_HepG2	ITSN1	23	21:35189535-35189918	22:24	0.0625	0.0943396	0.566667	0.557692				-0.48376	0.48376	0.000143714	0.00448774
SRSF3_HepG2	DFNA5	12	7:24745803-24745995	11:13	0.42623	0.459459	0.871795	0.97561				-0.480858	0.480858	1.59206e-13	3.60434e-11
SRSF3_HepG2	NINL	7	20:25490306-25490425	6:8	0.764706	0.704545	0.3	0.218182				0.475535	0.475535	2.71407e-11	4.4055e-09
SRSF3_HepG2	KIAA1217	25	10:24831812-24833410	24:26	0.290323	0.328571	0.789474	0.775				-0.47279	0.47279	1.31428e-11	2.2842e-09
SRSF3_HepG2	TEX261	3	2:71218960-71219113	2:4	0.387097	0.394231	0.93	0.777778				-0.463225	0.463225	5.91988e-09	6.88226e-07
SRSF3_HepG2	PPFIBP1	18	12:27827125-27827154	17:19	0.318182	0.391304	0.73913	0.892857				-0.461251	0.461251	1.88549e-06	0.000118834
SRSF3_HepG2	ZMIZ1	28	10:81070681-81070941	27:29	0.357143	0.370833	0.866667	0.772277				-0.455484	0.455484	0	0
SRSF3_HepG2	LARP4	10	12:50847243-50847455	9:11	0.46875	0.373494	0.884615	0.861111				-0.451741	0.451741	4.44089e-15	1.34053e-12
SRSF3_HepG2	RNF38	9	9:36356300-36356470	8:10	0.498108	0.612795	1	0.979798				-0.434447	0.434447	6.92779e-14	1.75294e-11
SRSF3_HepG2	DDC	4	7:50607613-50607726	3:5	0.230769	0.2	0.736842	0.545455				-0.425764	0.425764	9.19668e-05	0.00314405
SRSF3_HepG2	EML4	4	2:42488261-42488434	3:5	0.547466	0.575928	0.975166	0.980392				-0.416082	0.416082	0	0
SRSF3_HepG2	MGA	16	15:42034744-42035370	15:17	0.526316	0.647059	1	1				-0.413313	0.413313	1.18221e-06	7.76378e-05
SRSF3_HepG2	CCDC88A	27	2:55530205-55530288	26:28	0.597015	0.693182	0.253333	0.213483				0.41169	0.41169	5.15143e-14	1.38493e-11
SRSF3_HepG2	PROM1	6	4:16037358-16037384	5:7	0.5	0.48	0.130435	0.0344828				0.407541	0.407541	3.6158e-07	2.80241e-05
SRSF3_HepG2	NCOA6	13	20:33328167-33331145	12:14	0.576159	0.594737	0.983607	0.985149				-0.39893	0.39893	0	0
SRSF3_HepG2	NUMB	9	14:73750789-73751082	7:10	0.589474	0.595588	0.982609	1				-0.398773	0.398773	0	0
SRSF3_HepG2	ARHGEF11	39	1:156908210-156908305	38:40	0.923077	0.9	0.416667	0.615385				0.395513	0.395513	4.19017e-09	5.1132e-07
SRSF3_HepG2	EXOC1	11	4:56755054-56755098	10:12	0.434783	0.387097	0.833333	0.777778				-0.394616	0.394616	0.000128424	0.00409197
SRSF3_HepG2	A1CF	3	10:52622649-52622741	2:4	0.526316	0.416667	0.0666667	0.0909091				0.392703	0.392703	0.000106513	0.00354481
SRSF3_HepG2	WIPF2	6	17:38420555-38421398	5:7	0.590909	0.623762	0.982456	1				-0.383892	0.383892	0	0
SRSF3_HepG2	WDR13	6	X:48458707-48459014	5:7	0.62069	0.581395	0.965517	1				-0.381716	0.381716	9.88359e-09	1.09714e-06
SRSF3_HepG2	ZMYM6	6	1:35484954-35485203	5:7	0.642857	0.6	1	1				-0.378571	0.378571	8.58054e-08	7.81147e-06
SRSF3_HepG2	ORC3L	3	6:88304260-88304331	2:4	0.592593	0.537634	0.215054	0.175439				0.369867	0.369867	1.4353e-12	2.83859e-10
SRSF3_HepG2	RNF14	4	5:141350269-141350442	3:5	0.769231	0.5	1	1				-0.365385	0.365385	1.08874e-05	0.000563458
SRSF3_HepG2	GLTSCR1	7	19:48185233-48185409	6:8	0.409091	0.307692	0.75	0.694444				-0.363831	0.363831	3.39725e-05	0.00143267
SRSF3_HepG2	TFAP4	9	16:4310091-4310246	8:10	0.473684	0.8	1	1				-0.363158	0.363158	2.17775e-05	0.000996551
SRSF3_HepG2	CCDC132	19	7:92935140-92935316	18:20	0.545455	0.730769	1	1				-0.361888	0.361888	3.01192e-08	3.08471e-06
SRSF3_HepG2	NCAPG2	28	7:158443524-158443664	27:29	0.541667	0.555556	0.857143	0.956522				-0.358221	0.358221	1.21536e-06	7.92099e-05
SRSF3_HepG2	BLZF1	6	1:169351300-169351519	5:7	0.639344	0.623188	0.977528	1				-0.357498	0.357498	0	0
SRSF3_HepG2	TIAL1	7	10:121339983-121340358	6:8	0.563636	0.563636	0.177778	0.23913				0.355182	0.355182	1.64447e-07	1.37353e-05
SRSF3_HepG2	SLCO4A1	9	20:61299364-61299536	8:10	0.416667	0.617647	0.911765	0.826087				-0.351769	0.351769	1.28288e-05	0.000636116
SRSF3_HepG2	FASTK	2	7:150776587-150777009	1:3	0.666667	0.6	0.96875	1				-0.351042	0.351042	1.74773e-08	1.84487e-06
SRSF3_HepG2	ZNF341	3	20:32332909-32333105	2:4	0.538462	0.652174	0.888889	1				-0.349127	0.349127	0.000336329	0.00875473
SRSF3_HepG2	CLIP2	9	7:73787262-73787366	8:10	0.5	0.596774	0.111111	0.288462				0.348601	0.348601	3.63016e-05	0.00151426
SRSF3_HepG2	CNNM2	7	10:104831531-104831596	6:8	0.56	0.516667	0.230769	0.153846				0.346026	0.346026	0.000154871	0.00472466
SRSF3_HepG2	C6orf70	10	6:170166734-170166763	9:11	0.375	0.615385	0.789474	0.888889				-0.343989	0.343989	0.000546209	0.0125512
SRSF3_HepG2	C11orf9	20	11:61548184-61548264	19:21	0.485294	0.56701	0.186047	0.186275				0.339992	0.339992	1.00625e-11	1.76669e-09
SRSF3_HepG2	ST5	12	11:8751497-8752756	11:13	0.518519	0.529412	0.8125	0.914286				-0.339428	0.339428	1.85966e-05	0.000869491
SRSF3_HepG2	C1orf9	13	1:172546679-172546699	12:14	0.864865	0.916667	0.56	0.543478				0.339027	0.339027	2.85718e-07	2.27595e-05
SRSF3_HepG2	FLNB	33	3:58127585-58127656	32:34	0.375	0.415254	0.722222	0.739394				-0.335681	0.335681	1.78746e-14	5.12584e-12
SRSF3_HepG2	C13orf23	12	13:39586828-39588613	11:13	0.686275	0.651007	0.992857	1				-0.327788	0.327788	0	0
SRSF3_HepG2	PML	5	15:74324913-74325056	4:6	0.36	0.409091	0.588235	0.833333				-0.326239	0.326239	0.00133603	0.0248784
SRSF3_HepG2	MICALL1	10	22:38323418-38323833	8:11	0.681818	0.666667	1	1				-0.325758	0.325758	1.50633e-05	0.000730081
SRSF3_HepG2	CEACAM1	9	19:43015728-43015780	8:10	0.812881	0.774347	0.479361	0.457011				0.325428	0.325428	0	0
SRSF3_HepG2	MPZL3	3	11:118107765-118107975	2:4	0.653846	0.7	1	1				-0.323077	0.323077	6.11227e-06	0.000334929
SRSF3_HepG2	C22orf39	20	22:19365392-19365589	19:21	0.609195	0.730769	1	0.979452				-0.319744	0.319744	0	0
SRSF3_HepG2	HIRA	19	22:19365392-19365589	18:20	0.609195	0.730769	1	0.979452				-0.319744	0.319744	0	0
SRSF3_HepG2	MLXIP	8	12:122616839-122616930	7:9	0.494505	0.50495	0.823529	0.813814				-0.318944	0.318944	2.01658e-06	0.000126172
SRSF3_HepG2	IRF9	7	14:24633823-24634164	6:8	0.642857	0.647059	1	0.925926				-0.318005	0.318005	7.46307e-05	0.0026641
[truncated: 499 more rows]

## Sheet: TRA2A_and_TRA2B
	gene_symbol	exon_skipped	coordonnees	exons_flanquants	psi_MDA.MB.231_TRA2A.B	psi_MDA.MB.231_TRA2A.B	psi_MDA.MB.231_TRA2A.B	psi_MDA.MB.231_neg	psi_MDA.MB.231_neg	psi_MDA.MB.231_neg	deltaPSI	valeur abs deltaPSI	pvalue_glm	pvalue_corrigee_glm		negative deltaPsi= activated exons
[truncated: 715 more rows]

[truncated: 4 more sheets: HNRNPH1, HNRNPK, HNRNPL, PTBP1]
