# Supplementary material for: Interplay between coding and exonic splicing regulatory sequences
Source: HighWire-hosted journal article supplement (doi:10.1101/gr.241315.118), 2019-04-08
Supplement: Supplemental_Table_S2.xlsx [file Supplemental_Table_S2.xlsx]

## Sheet: Description
Supplementary Tables S2:	Frequencies of hexanucleotides, nucleotides, dinucleotides, codons, codon nucleotide position, amino acids, and encoded physicochemical amino acid properties in splicing factor-regulated exons.
Hexanucleotides	Lists of the ten most enriched hexanucleotides in SRSF-activated exons or HNRNP-repressed exons. Those same enriched hexanucleotides are also displayed for SRSF-repressed and HNRNP-activated exons.
Nucleotides	Nucleotides enrichment analysis for every set of exons activated or repressed by a splicing factor.
Dinucleotides	Dinucleotides enrichment analysis for every set of exons activated or repressed by a splicing factor.
Codons	Codons enrichment analysis for every set of exons activated or repressed by a splicing factor.
Nucleotide Positions	Nucleotide enrichment analysis given their positions within codons for every set of exons activated or repressed by a splicing factor.
Amino Acids	Encoded amino acids enrichment analysis for every set of exons activated or repressed by a splicing factor.
Physicochemical Properties	Physicochemical properties of encoded amino acids enrichment analysis for every set of exons activated or repressed by a splicing factor.

## Sheet: Hexanucleotides
Project	hexanucleotide	frequencies_of_the_interest_set	average_frequencies_of_the_10000_sets	diff	p_values_like	BH_pcor	regulation_(p<=0,05)	reg(p_cor<=0,05)			Project	hexanucleotide	frequencies_of_the_interest_set	average_frequencies_of_the_10000_sets	diff	p_values_like	BH_pcor	regulation_(p<=0,05)	reg(p_cor<=0,05)			Project	hexanucleotide	frequencies_of_the_interest_set	average_frequencies_of_the_10000_sets	diff	p_values_like	BH_pcor	regulation_(p<=0,05)	reg(p_cor<=0,05)			Project	hexanucleotide	frequencies_of_the_interest_set	average_frequencies_of_the_10000_sets	diff	p_values_like	BH_pcor	regulation_(p<=0,05)	reg(p_cor<=0,05)		Project	hexanucleotide	frequencies_of_the_interest_set	average_frequencies_of_the_10000_sets	diff	p_values_like	BH_pcor
01_1_SRSF1_K562_ENCSR066VOO_activated	GGAGGA	0.00200248	0.000986804	0.00101567	0	0	+	+			01_2_SRSF1_HepG2_ENCSR094KBY_activated	GGAGGA	0.00185798	0.000987356	0.000870628	0	0	+	+			01_3_SRSF1_GM19238_GSE52834_activated	GGAGGA	0.00219042	0.000997825	0.0011926	0.001	0.0025	+	+			01_4_SRSF1_Hela_GSE26463_activated	GGAGGA	0.00263564	0.000983605	0.00165204	0	0	+	+		02_1_SRSF2_K562_GSE65349_activated	GCTGCT	0.00150029	0.00084633	0.000653964	0.0479	0.0684286
01_1_SRSF1_K562_ENCSR066VOO_activated	GAGGAG	0.00201811	0.00107299	0.000945123	0	0	+	+			01_2_SRSF1_HepG2_ENCSR094KBY_activated	GAGGAG	0.00191464	0.00107611	0.000838529	0	0	+	+			01_3_SRSF1_GM19238_GSE52834_activated	GAGGAG	0.00188061	0.00108544	0.000795163	0.0136	0.0226667	+	+			01_4_SRSF1_Hela_GSE26463_activated	GAGGAG	0.00288517	0.00107177	0.0018134	0	0	+	+		02_1_SRSF2_K562_GSE65349_activated	GAGCAG	0.00175748	0.000762297	0.000995183	0.0051	0.01275
01_1_SRSF1_K562_ENCSR066VOO_activated	AGAGGA	0.00135232	0.00077412	0.000578196	0	0	+	+			01_2_SRSF1_HepG2_ENCSR094KBY_activated	AGAGGA	0.00145054	0.000778333	0.000672212	0	0	+	+			01_3_SRSF1_GM19238_GSE52834_activated	AGAGGA	0.00187786	0.000781012	0.00109685	0.0001	0.000333333	+	+			01_4_SRSF1_Hela_GSE26463_activated	AGAGGA	0.00212356	0.000780316	0.00134325	0	0	+	+		02_1_SRSF2_K562_GSE65349_activated	CTGCTG	0.00172432	0.00110383	0.000620488	0.0726	0.0841111
01_1_SRSF1_K562_ENCSR066VOO_activated	TGAGGA	0.00138297	0.000685838	0.000697136	0	0	+	+			01_2_SRSF1_HepG2_ENCSR094KBY_activated	TGAGGA	0.00119464	0.000683576	0.000511065	0	0	+	+			01_3_SRSF1_GM19238_GSE52834_activated	TGAGGA	0.00165998	0.000681509	0.000978474	0.0001	0.000333333	+	+			01_4_SRSF1_Hela_GSE26463_activated	TGAGGA	0.00180394	0.000686905	0.00111704	0	0	+	+		02_1_SRSF2_K562_GSE65349_activated	GAGGAG	0.00252817	0.00108604	0.00144213	0.0041	0.01275
01_1_SRSF1_K562_ENCSR066VOO_activated	CAGGAG	0.00149516	0.00080806	0.0006871	0	0	+	+			01_2_SRSF1_HepG2_ENCSR094KBY_activated	CAGGAG	0.00142505	0.000810006	0.000615048	0	0	+	+			01_3_SRSF1_GM19238_GSE52834_activated	CAGGAG	0.00125033	0.000813393	0.000436938	0.0429	0.053625	*	=			01_4_SRSF1_Hela_GSE26463_activated	CAGGAG	0.0022498	0.000805802	0.001444	0	0	+	+		02_1_SRSF2_K562_GSE65349_activated	GGAGGA	0.00242818	0.000997508	0.00143068	0.0035	0.01275
01_1_SRSF1_K562_ENCSR066VOO_activated	AGGAGG	0.00138269	0.000792941	0.000589748	0.0001	0.000111111	+	+			01_2_SRSF1_HepG2_ENCSR094KBY_activated	AGGAGG	0.0013362	0.000793623	0.000542578	0.0001	0.000111111	+	+			01_3_SRSF1_GM19238_GSE52834_activated	AGGAGG	0.00116941	0.00080665	0.000362759	0.0975	0.108333	=	=			01_4_SRSF1_Hela_GSE26463_activated	AGGAGG	0.00224978	0.000787447	0.00146233	0	0	+	+		02_1_SRSF2_K562_GSE65349_activated	AGGAGG	0.00193087	0.000805577	0.00112529	0.0083	0.0138333
01_1_SRSF1_K562_ENCSR066VOO_activated	AGGAGA	0.0013217	0.000863763	0.000457936	0.0002	0.0002	+	+			01_2_SRSF1_HepG2_ENCSR094KBY_activated	AGGAGA	0.00135411	0.000867084	0.000487027	0.0004	0.0004	+	+			01_3_SRSF1_GM19238_GSE52834_activated	AGGAGA	0.00170522	0.000867755	0.000837466	0.0026	0.0052	+	+			01_4_SRSF1_Hela_GSE26463_activated	AGGAGA	0.00184861	0.000865893	0.000982716	0	0	+	+		02_1_SRSF2_K562_GSE65349_activated	TGCTGC	0.00134723	0.000814493	0.000532735	0.0757	0.0841111
01_1_SRSF1_K562_ENCSR066VOO_activated	GAGGAT	0.00102088	0.000430883	0.000589999	0	0	+	+			01_2_SRSF1_HepG2_ENCSR094KBY_activated	GAGGAT	0.0008855	0.000430861	0.000454639	0	0	+	+			01_3_SRSF1_GM19238_GSE52834_activated	GAGGAT	0.00134607	0.000430422	0.000915651	0	0	+	+			01_4_SRSF1_Hela_GSE26463_activated	GAGGAT	0.00119244	0.00043173	0.000760711	0	0	+	+		02_1_SRSF2_K562_GSE65349_activated	AGCTGC	0.00165824	0.000789029	0.000869206	0.008	0.0138333
01_1_SRSF1_K562_ENCSR066VOO_activated	GGAGCT	0.00133015	0.000723085	0.000607064	0	0	+	+			01_2_SRSF1_HepG2_ENCSR094KBY_activated	GGAGCT	0.0013745	0.000721954	0.000652543	0	0	+	+			01_3_SRSF1_GM19238_GSE52834_activated	GGAGCT	0.000931409	0.000723011	0.000208397	0.1732	0.1732	=	=			01_4_SRSF1_Hela_GSE26463_activated	GGAGCT	0.00179958	0.000719356	0.00108022	0	0	+	+		02_1_SRSF2_K562_GSE65349_activated	TGCAGT	0.00137536	0.000427035	0.000948323	0.0008	0.008
01_1_SRSF1_K562_ENCSR066VOO_activated	GCAGGA	0.00111796	0.000603816	0.00051414	0	0	+	+			01_2_SRSF1_HepG2_ENCSR094KBY_activated	GCAGGA	0.00100894	0.000604409	0.000404535	0.0001	0.000111111	+	+			01_3_SRSF1_GM19238_GSE52834_activated	GCAGGA	0.00105479	0.00060577	0.000449023	0.0234	0.0334286	+	+			01_4_SRSF1_Hela_GSE26463_activated	GCAGGA	0.00176941	0.000602103	0.0011673	0	0	+	+		02_1_SRSF2_K562_GSE65349_activated	CAGCAG	0.00162847	0.00106317	0.000565304	0.0891	0.0891
Project	hexanucleotide	frequencies_of_the_interest_set	average_frequencies_of_the_10000_sets	diff	p_values_like	BH_pcor	regulation_(p<=0,05)	reg(p_cor<=0,05)			Project	hexanucleotide	frequencies_of_the_interest_set	average_frequencies_of_the_10000_sets	diff	p_values_like	BH_pcor	regulation_(p<=0,05)	reg(p_cor<=0,05)			Project	hexanucleotide	frequencies_of_the_interest_set	average_frequencies_of_the_10000_sets	diff	p_values_like	BH_pcor	regulation_(p<=0,05)	reg(p_cor<=0,05)			Project	hexanucleotide	frequencies_of_the_interest_set	average_frequencies_of_the_10000_sets	diff	p_values_like	BH_pcor	regulation_(p<=0,05)	reg(p_cor<=0,05)		Project	hexanucleotide	frequencies_of_the_interest_set	average_frequencies_of_the_10000_sets	diff	p_values_like	BH_pcor
01_1_SRSF1_K562_ENCSR066VOO_repressed	GGAGGA	0.000468336	0.000959407	-0.00049107	0.0056	0.0165	-	-			01_2_SRSF1_HepG2_ENCSR094KBY_repressed	GGAGGA	0.000365305	0.000961642	-0.000596336	0.0009	0.009	-	-			01_3_SRSF1_GM19238_GSE52834_repressed	GGAGGA	0.000974911	0.000980298	-5.38741e-06	0.463	0.4687	=	=			01_4_SRSF1_Hela_GSE26463_repressed	GGAGGA	0.000383101	0.000968078	-0.000584977	0.0849	0.1698	=	=		02_1_SRSF2_K562_GSE65349_repressed	GCTGCT	0.00072705	0.000807756	-8.07058e-05	0.3959	0.4479
01_1_SRSF1_K562_ENCSR066VOO_repressed	GAGGAG	0.00061774	0.00105585	-0.000438106	0.0212	0.0302857	-	-			01_2_SRSF1_HepG2_ENCSR094KBY_repressed	GAGGAG	0.000454839	0.00105277	-0.000597929	0.0025	0.009	-	-			01_3_SRSF1_GM19238_GSE52834_repressed	GAGGAG	0.000968721	0.00107238	-0.000103656	0.4403	0.4687	=	=			01_4_SRSF1_Hela_GSE26463_repressed	GAGGAG	0.000489262	0.00105712	-0.000567854	0.109	0.181667	=	=		02_1_SRSF2_K562_GSE65349_repressed	GAGCAG	0.000774967	0.000726696	4.82712e-05	0.3934	0.4479
01_1_SRSF1_K562_ENCSR066VOO_repressed	AGAGGA	0.000402362	0.000812917	-0.000410554	0.0088	0.0176	-	-			01_2_SRSF1_HepG2_ENCSR094KBY_repressed	AGAGGA	0.000493343	0.000811719	-0.000318376	0.0478	0.05975	*	=			01_3_SRSF1_GM19238_GSE52834_repressed	AGAGGA	0.000782495	0.000787551	-5.05605e-06	0.4687	0.4687	=	=			01_4_SRSF1_Hela_GSE26463_repressed	AGAGGA	0.000534217	0.000804784	-0.000270567	0.271	0.301111	=	=		02_1_SRSF2_K562_GSE65349_repressed	CTGCTG	0.000584213	0.00105339	-0.000469173	0.0371	0.371
01_1_SRSF1_K562_ENCSR066VOO_repressed	TGAGGA	0.000488104	0.000689713	-0.000201609	0.1091	0.136375	=	=			01_2_SRSF1_HepG2_ENCSR094KBY_repressed	TGAGGA	0.00024773	0.000689991	-0.000442261	0.0027	0.009	-	-			01_3_SRSF1_GM19238_GSE52834_repressed	TGAGGA	0.000437869	0.000680819	-0.00024295	0.2177	0.464	=	=			01_4_SRSF1_Hela_GSE26463_repressed	TGAGGA	0	0.000675694	-0.000675694	0.0122	0.061	-	=		02_1_SRSF2_K562_GSE65349_repressed	GAGGAG	0.0010982	0.00104662	5.1585e-05	0.4041	0.4479
01_1_SRSF1_K562_ENCSR066VOO_repressed	CAGGAG	0.000638089	0.000802115	-0.000164026	0.1923	0.213667	=	=			01_2_SRSF1_HepG2_ENCSR094KBY_repressed	CAGGAG	0.000767185	0.000802568	-3.53822e-05	0.4446	0.4446	=	=			01_3_SRSF1_GM19238_GSE52834_repressed	CAGGAG	0.000749394	0.00079977	-5.03759e-05	0.4618	0.4687	=	=			01_4_SRSF1_Hela_GSE26463_repressed	CAGGAG	0.000532111	0.00080104	-0.000268929	0.2626	0.301111	=	=		02_1_SRSF2_K562_GSE65349_repressed	GGAGGA	0.000966695	0.000956092	1.0603e-05	0.4479	0.4479
01_1_SRSF1_K562_ENCSR066VOO_repressed	AGGAGG	0.000653044	0.000758557	-0.000105513	0.3143	0.3143	=	=			01_2_SRSF1_HepG2_ENCSR094KBY_repressed	AGGAGG	0.0003419	0.000757964	-0.000416065	0.0102	0.0204	-	-			01_3_SRSF1_GM19238_GSE52834_repressed	AGGAGG	0.00069738	0.000776934	-7.95541e-05	0.4602	0.4687	=	=			01_4_SRSF1_Hela_GSE26463_repressed	AGGAGG	0.000383101	0.000762747	-0.000379646	0.1835	0.262143	=	=		02_1_SRSF2_K562_GSE65349_repressed	AGGAGG	0.000667793	0.000755075	-8.72817e-05	0.3957	0.4479
01_1_SRSF1_K562_ENCSR066VOO_repressed	AGGAGA	0.000431385	0.000909616	-0.000478231	0.0028	0.014	-	-			01_2_SRSF1_HepG2_ENCSR094KBY_repressed	AGGAGA	0.000773628	0.000902066	-0.000128439	0.2794	0.310444	=	=			01_3_SRSF1_GM19238_GSE52834_repressed	AGGAGA	0.000535881	0.000871924	-0.000336042	0.1658	0.464	=	=			01_4_SRSF1_Hela_GSE26463_repressed	AGGAGA	5.57679e-05	0.000895516	-0.000839748	0.0035	0.035	-	-		02_1_SRSF2_K562_GSE65349_repressed	TGCTGC	0.00051876	0.000784347	-0.000265587	0.1335	0.4479
01_1_SRSF1_K562_ENCSR066VOO_repressed	GAGGAT	0.000149691	0.000436127	-0.000286436	0.0066	0.0165	-	-			01_2_SRSF1_HepG2_ENCSR094KBY_repressed	GAGGAT	0.000176955	0.000435952	-0.000258997	0.0225	0.0332857	-	-			01_3_SRSF1_GM19238_GSE52834_repressed	GAGGAT	0.000242421	0.000428835	-0.000186414	0.232	0.464	=	=			01_4_SRSF1_Hela_GSE26463_repressed	GAGGAT	0	0.000427266	-0.000427266	0.0612	0.153	=	=		02_1_SRSF2_K562_GSE65349_repressed	AGCTGC	0.000580061	0.000737043	-0.000156982	0.249	0.4479
01_1_SRSF1_K562_ENCSR066VOO_repressed	GGAGCT	0.000268957	0.000702577	-0.00043362	0.0014	0.014	-	-			01_2_SRSF1_HepG2_ENCSR094KBY_repressed	GGAGCT	0.000292932	0.000704106	-0.000411174	0.0049	0.01225	-	-			01_3_SRSF1_GM19238_GSE52834_repressed	GGAGCT	0.000354795	0.000720428	-0.000365633	0.1088	0.464	=	=			01_4_SRSF1_Hela_GSE26463_repressed	GGAGCT	0.000195699	0.000704787	-0.000509088	0.0573	0.153	=	=		02_1_SRSF2_K562_GSE65349_repressed	TGCAGT	0.000291627	0.000429247	-0.00013762	0.2154	0.4479
01_1_SRSF1_K562_ENCSR066VOO_repressed	GCAGGA	0.000286751	0.000582963	-0.000296211	0.0178	0.0296667	-	-			01_2_SRSF1_HepG2_ENCSR094KBY_repressed	GCAGGA	0.000288942	0.00058671	-0.000297769	0.0233	0.0332857	-	-			01_3_SRSF1_GM19238_GSE52834_repressed	GCAGGA	0.000294186	0.000596787	-0.000302601	0.1307	0.464	=	=			01_4_SRSF1_Hela_GSE26463_repressed	GCAGGA	0.000476343	0.000582126	-0.000105783	0.4113	0.4113	=	=		02_1_SRSF2_K562_GSE65349_repressed	CAGCAG	0.000712316	0.00100373	-0.000291415	0.1404	0.4479
[truncated: 146 more columns]

## Sheet: Nucleotides
Project	nt_info	frequencies_of_the_interest_set	frequencies_interest_set_5p	frequencies_interest_set_3p	average_frequencies_of_the_10000_sets	IC_95_of_the_10000_sets	p_values_like	BH_pcor	regulation_(p<=0,05)	reg(p_cor<=0,05)			Project	nt_info	frequencies_of_the_interest_set	frequencies_interest_set_5p	frequencies_interest_set_3p	average_frequencies_of_the_10000_sets	IC_95_of_the_10000_sets	p_values_like	BH_pcor	regulation_(p<=0,05)	reg(p_cor<=0,05)			Project	nt_info	frequencies_of_the_interest_set	frequencies_interest_set_5p	frequencies_interest_set_3p	average_frequencies_of_the_10000_sets	IC_95_of_the_10000_sets	p_values_like	BH_pcor	regulation_(p<=0,05)	reg(p_cor<=0,05)			Project	nt_info	frequencies_of_the_interest_set	frequencies_interest_set_5p	frequencies_interest_set_3p	average_frequencies_of_the_10000_sets	IC_95_of_the_10000_sets	p_values_like	BH_pcor	regulation_(p<=0,05)	reg(p_cor<=0,05)
01_1_SRSF1_K562_ENCSR066VOO_activated	A	0.267178	0.262123	0.27521	0.272871	[0,26734439944433463; 0,27840670410105234]	0.022	0.0244444	-	-			01_2_SRSF1_HepG2_ENCSR094KBY_activated	A	0.272629	0.268187	0.281813	0.273171	[0,2671337117393722; 0,2792910559149724]	0.4316	0.4316	=	=			01_3_SRSF1_GM19238_GSE52834_activated	A	0.280531	0.274809	0.282697	0.272805	[0,26053403695952315; 0,285345872450888]	0.112	0.224	=	=			01_4_SRSF1_Hela_GSE26463_activated	A	0.269173	0.273297	0.287634	0.273848	[0,26342614040536455; 0,2840741830657217]	0.1916	0.212889	=	=
01_1_SRSF1_K562_ENCSR066VOO_activated	C	0.238203	0.234173	0.237827	0.240743	[0,23558716331684135; 0,24590770795873024]	0.1685	0.1685	=	=			01_2_SRSF1_HepG2_ENCSR094KBY_activated	C	0.237138	0.231569	0.236253	0.240557	[0,23479893978116181; 0,24622937640583648]	0.1164	0.129333	=	=			01_3_SRSF1_GM19238_GSE52834_activated	C	0.230276	0.227226	0.229262	0.241398	[0,2296610446356357; 0,25309452127948073]	0.031	0.103333	*	=			01_4_SRSF1_Hela_GSE26463_activated	C	0.239551	0.222401	0.239247	0.239801	[0,23007836813393498; 0,24960401614879899]	0.4793	0.4793	=	=
01_1_SRSF1_K562_ENCSR066VOO_activated	G	0.273721	0.273086	0.27763	0.257215	[0,2529566749810125; 0,2614667014962717]	0	0	+	+			01_2_SRSF1_HepG2_ENCSR094KBY_activated	G	0.266647	0.26983	0.270134	0.257328	[0,2524835650393629; 0,26205675368896386]	0.0001	0.001	+	+			01_3_SRSF1_GM19238_GSE52834_activated	G	0.265899	0.268702	0.272774	0.257661	[0,24787893730105412; 0,2676583744676604]	0.0536	0.134	=	=			01_4_SRSF1_Hela_GSE26463_activated	G	0.283628	0.286738	0.284946	0.256946	[0,2486894519584186; 0,26516854334930945]	0	0	+	+
01_1_SRSF1_K562_ENCSR066VOO_activated	T	0.220897	0.230617	0.209333	0.229171	[0,22461751517905226; 0,23361969052655274]	0.0001	0.000166667	-	-			01_2_SRSF1_HepG2_ENCSR094KBY_activated	T	0.223586	0.230414	0.2118	0.228943	[0,22400038250189255; 0,23401136135081202]	0.0164	0.041	-	-			01_3_SRSF1_GM19238_GSE52834_activated	T	0.223294	0.229262	0.215267	0.228137	[0,21793794599275462; 0,23830245040345088]	0.1826	0.297625	=	=			01_4_SRSF1_Hela_GSE26463_activated	T	0.207648	0.217563	0.188172	0.229406	[0,2210573760066189; 0,23811083972837607]	0	0	-	-
01_1_SRSF1_K562_ENCSR066VOO_activated	S	0.511925	0.507259	0.515457	0.497958	[0,49081655014705683; 0,5052420942589608]	0.0002	0.00025	+	+			01_2_SRSF1_HepG2_ENCSR094KBY_activated	S	0.503785	0.501399	0.506387	0.497885	[0,4899284748295098; 0,5059043255704718]	0.0761	0.095125	=	=			01_3_SRSF1_GM19238_GSE52834_activated	S	0.496175	0.495929	0.502036	0.499059	[0,482443467697227; 0,5154231497369276]	0.3622	0.3622	=	=			01_4_SRSF1_Hela_GSE26463_activated	S	0.523179	0.50914	0.524194	0.496746	[0,4831374631317189; 0,5103821506247809]	0	0	+	+
01_1_SRSF1_K562_ENCSR066VOO_activated	W	0.488075	0.492741	0.484543	0.502042	[0,4947605133161107; 0,50918651837741]	0.0002	0.00025	-	-			01_2_SRSF1_HepG2_ENCSR094KBY_activated	W	0.496215	0.498601	0.493613	0.502115	[0,4941048541837021; 0,510088142729899]	0.0761	0.095125	=	=			01_3_SRSF1_GM19238_GSE52834_activated	W	0.503825	0.504071	0.497964	0.500941	[0,48458862307008566; 0,5175579433050714]	0.3622	0.3622	=	=			01_4_SRSF1_Hela_GSE26463_activated	W	0.476821	0.49086	0.475806	0.503254	[0,4896183950344661; 0,5168673025035775]	0	0	-	-
01_1_SRSF1_K562_ENCSR066VOO_activated	Y	0.459101	0.46479	0.44716	0.469914	[0,46480523761597337; 0,4750482289059745]	0	0	-	-			01_2_SRSF1_HepG2_ENCSR094KBY_activated	Y	0.460724	0.461983	0.448054	0.4695	[0,4637786201261878; 0,47510843773117706]	0.0016	0.00533333	-	-			01_3_SRSF1_GM19238_GSE52834_activated	Y	0.45357	0.456489	0.444529	0.469535	[0,4577793427394508; 0,48125599212577164]	0.0038	0.019	-	-			01_4_SRSF1_Hela_GSE26463_activated	Y	0.447199	0.439964	0.427419	0.469207	[0,45941027300288645; 0,4791095270495188]	0	0	-	-
01_1_SRSF1_K562_ENCSR066VOO_activated	R	0.540899	0.53521	0.55284	0.530086	[0,524965244818216; 0,5352021468806666]	0	0	+	+			01_2_SRSF1_HepG2_ENCSR094KBY_activated	R	0.539276	0.538017	0.551946	0.5305	[0,5248929321252394; 0,5362244787555082]	0.0016	0.00533333	+	+			01_3_SRSF1_GM19238_GSE52834_activated	R	0.54643	0.543511	0.555471	0.530465	[0,518769578778574; 0,5422277350865659]	0.0038	0.019	+	+			01_4_SRSF1_Hela_GSE26463_activated	R	0.552801	0.560036	0.572581	0.530793	[0,5208951452736841; 0,5405929420013638]	0	0	+	+
01_1_SRSF1_K562_ENCSR066VOO_activated	K	0.494619	0.503704	0.486963	0.486386	[0,48217886232357604; 0,4904865589164831]	0	0	+	+			01_2_SRSF1_HepG2_ENCSR094KBY_activated	K	0.490232	0.500243	0.481934	0.486272	[0,4816241386341238; 0,49082235245723]	0.0452	0.0753333	*	=			01_3_SRSF1_GM19238_GSE52834_activated	K	0.489193	0.497964	0.488041	0.485798	[0,47635879865223896; 0,49510360000121645]	0.2381	0.297625	=	=			01_4_SRSF1_Hela_GSE26463_activated	K	0.491276	0.504301	0.473118	0.486351	[0,47844465718139495; 0,49419519607414775]	0.1103	0.137875	=	=
01_1_SRSF1_K562_ENCSR066VOO_activated	M	0.505381	0.496296	0.513037	0.513614	[0,5095152736457486; 0,5178213589319827]	0	0	-	-			01_2_SRSF1_HepG2_ENCSR094KBY_activated	M	0.509768	0.499757	0.518066	0.513728	[0,5091864437325258; 0,5183765367037065]	0.0452	0.0753333	*	=			01_3_SRSF1_GM19238_GSE52834_activated	M	0.510807	0.502036	0.511959	0.514202	[0,5049000089218725; 0,5236512257477981]	0.2381	0.297625	=	=			01_4_SRSF1_Hela_GSE26463_activated	M	0.508724	0.495699	0.526882	0.513649	[0,5058210859290387; 0,5215565972982423]	0.1103	0.137875	=	=
Project	nt_info	frequencies_of_the_interest_set	frequencies_interest_set_5p	frequencies_interest_set_3p	average_frequencies_of_the_10000_sets	IC_95_of_the_10000_sets	p_values_like	BH_pcor	regulation_(p<=0,05)	reg(p_cor<=0,05)			Project	nt_info	frequencies_of_the_interest_set	frequencies_interest_set_5p	frequencies_interest_set_3p	average_frequencies_of_the_10000_sets	IC_95_of_the_10000_sets	p_values_like	BH_pcor	regulation_(p<=0,05)	reg(p_cor<=0,05)			Project	nt_info	frequencies_of_the_interest_set	frequencies_interest_set_5p	frequencies_interest_set_3p	average_frequencies_of_the_10000_sets	IC_95_of_the_10000_sets	p_values_like	BH_pcor	regulation_(p<=0,05)	reg(p_cor<=0,05)			Project	nt_info	frequencies_of_the_interest_set	frequencies_interest_set_5p	frequencies_interest_set_3p	average_frequencies_of_the_10000_sets	IC_95_of_the_10000_sets	p_values_like	BH_pcor	regulation_(p<=0,05)	reg(p_cor<=0,05)
01_1_SRSF1_K562_ENCSR066VOO_repressed	A	0.305228	0.289783	0.317625	0.280031	[0,2713480309091687; 0,2888235484718024]	0	0	+	+			01_2_SRSF1_HepG2_ENCSR094KBY_repressed	A	0.279658	0.271674	0.291273	0.279428	[0,2697920339298483; 0,2889270179583545]	0.4809	0.4809	=	=			01_3_SRSF1_GM19238_GSE52834_repressed	A	0.274678	0.27316	0.290909	0.275185	[0,25890002985943883; 0,29184040386139926]	0.4766	0.4766	=	=			01_4_SRSF1_Hela_GSE26463_repressed	A	0.26187	0.255357	0.266071	0.278759	[0,2595795457030917; 0,2981134293178139]	0.0403	0.0998	*	=
01_1_SRSF1_K562_ENCSR066VOO_repressed	C	0.222384	0.224266	0.232695	0.233767	[0,22583922927981925; 0,241878365125883]	0.0027	0.003375	-	-			01_2_SRSF1_HepG2_ENCSR094KBY_repressed	C	0.231547	0.235193	0.234907	0.234346	[0,22583257952894764; 0,24302157729096693]	0.2639	0.293222	=	=			01_3_SRSF1_GM19238_GSE52834_repressed	C	0.234492	0.22987	0.235065	0.238386	[0,22364701522609204; 0,2535381191749211]	0.312	0.346667	=	=			01_4_SRSF1_Hela_GSE26463_repressed	C	0.256085	0.256548	0.260714	0.234997	[0,21777798636560822; 0,25251105668199064]	0.0092	0.0306667	+	+
01_1_SRSF1_K562_ENCSR066VOO_repressed	G	0.224887	0.228097	0.216858	0.25624	[0,2492082726948117; 0,26336784120532]	0	0	-	-			01_2_SRSF1_HepG2_ENCSR094KBY_repressed	G	0.237461	0.23877	0.235479	0.256154	[0,24862440389211748; 0,2637133799298456]	0	0	-	-			01_3_SRSF1_GM19238_GSE52834_repressed	G	0.246561	0.252381	0.238095	0.256798	[0,2440760104317016; 0,2697839127539191]	0.0592	0.157167	=	=			01_4_SRSF1_Hela_GSE26463_repressed	G	0.243711	0.247619	0.238095	0.2563	[0,24154495384379585; 0,27161504095479333]	0.0499	0.0998	*	=
01_1_SRSF1_K562_ENCSR066VOO_repressed	T	0.2475	0.257854	0.232822	0.229962	[0,2225376020275233; 0,23717879275258377]	0	0	+	+			01_2_SRSF1_HepG2_ENCSR094KBY_repressed	T	0.251334	0.254363	0.23834	0.230072	[0,22220832404603488; 0,23804227137733266]	0	0	+	+			01_3_SRSF1_GM19238_GSE52834_repressed	T	0.244269	0.244589	0.235931	0.22963	[0,21615255529170857; 0,2430390056205806]	0.0167	0.157167	+	=			01_4_SRSF1_Hela_GSE26463_repressed	T	0.238334	0.240476	0.235119	0.229944	[0,21412341754128295; 0,2459156219036493]	0.1484	0.247333	=	=
01_1_SRSF1_K562_ENCSR066VOO_repressed	S	0.447272	0.452363	0.449553	0.490007	[0,47924525488646713; 0,5010287968256455]	0	0	-	-			01_2_SRSF1_HepG2_ENCSR094KBY_repressed	S	0.469008	0.473963	0.470386	0.4905	[0,4788089039117239; 0,5023913410642391]	0.0001	0.000166667	-	-			01_3_SRSF1_GM19238_GSE52834_repressed	S	0.481053	0.482251	0.47316	0.495184	[0,4745241081248784; 0,5163206194364426]	0.0943	0.157167	=	=			01_4_SRSF1_Hela_GSE26463_repressed	S	0.499796	0.504167	0.49881	0.491296	[0,4672159453805834; 0,515225891398472]	0.2428	0.2925	=	=
01_1_SRSF1_K562_ENCSR066VOO_repressed	W	0.552728	0.547637	0.550447	0.509993	[0,4989739651358449; 0,5207610104851228]	0	0	+	+			01_2_SRSF1_HepG2_ENCSR094KBY_repressed	W	0.530992	0.526037	0.529614	0.5095	[0,4976169329491043; 0,5211983135109274]	0.0001	0.000166667	+	+			01_3_SRSF1_GM19238_GSE52834_repressed	W	0.518947	0.517749	0.52684	0.504816	[0,48369224136689515; 0,5255011034411212]	0.0943	0.157167	=	=			01_4_SRSF1_Hela_GSE26463_repressed	W	0.500204	0.495833	0.50119	0.508704	[0,48478656026801276; 0,5328083442293554]	0.2428	0.2925	=	=
01_1_SRSF1_K562_ENCSR066VOO_repressed	Y	0.469885	0.48212	0.465517	0.463729	[0,4553041227642789; 0,47228001690339916]	0.0764	0.0764	=	=			01_2_SRSF1_HepG2_ENCSR094KBY_repressed	Y	0.482881	0.489557	0.473247	0.464418	[0,4551070268905699; 0,47349387236639684]	0	0	+	+			01_3_SRSF1_GM19238_GSE52834_repressed	Y	0.478761	0.474459	0.470996	0.468016	[0,452593195907549; 0,4834941372663512]	0.0854	0.157167	=	=			01_4_SRSF1_Hela_GSE26463_repressed	Y	0.49442	0.497024	0.495833	0.464941	[0,4467645890728352; 0,4834308211372531]	0.001	0.005	+	+
01_1_SRSF1_K562_ENCSR066VOO_repressed	R	0.530115	0.51788	0.534483	0.536271	[0,5277200192962719; 0,5447037927216787]	0.0764	0.0764	=	=			01_2_SRSF1_HepG2_ENCSR094KBY_repressed	R	0.517119	0.510443	0.526753	0.535582	[0,5265308201475085; 0,5448942742818226]	0	0	-	-			01_3_SRSF1_GM19238_GSE52834_repressed	R	0.521239	0.525541	0.529004	0.531984	[0,516513269686516; 0,547420247170038]	0.0854	0.157167	=	=			01_4_SRSF1_Hela_GSE26463_repressed	R	0.50558	0.502976	0.504167	0.535059	[0,5165862025948994; 0,5532372268735715]	0.001	0.005	-	-
01_1_SRSF1_K562_ENCSR066VOO_repressed	K	0.472388	0.485951	0.449681	0.486202	[0,47907197774340315; 0,4933536105490871]	0	0	-	-			01_2_SRSF1_HepG2_ENCSR094KBY_repressed	K	0.488795	0.493133	0.47382	0.486226	[0,4785774450070934; 0,49366230132123734]	0.2597	0.293222	=	=			01_3_SRSF1_GM19238_GSE52834_repressed	K	0.490831	0.49697	0.474026	0.486429	[0,47391303568879584; 0,4987440173497072]	0.2472	0.309	=	=			01_4_SRSF1_Hela_GSE26463_repressed	K	0.482045	0.488095	0.473214	0.486244	[0,47134764739135177; 0,5012548316780471]	0.2925	0.2925	=	=
01_1_SRSF1_K562_ENCSR066VOO_repressed	M	0.527612	0.514049	0.550319	0.513798	[0,5066467396800287; 0,5209280802977738]	0	0	+	+			01_2_SRSF1_HepG2_ENCSR094KBY_repressed	M	0.511205	0.506867	0.52618	0.513774	[0,5063476317429692; 0,5214261947219649]	0.2597	0.293222	=	=			01_3_SRSF1_GM19238_GSE52834_repressed	M	0.509169	0.50303	0.525974	0.513571	[0,5012608591510481; 0,5260958440419286]	0.2472	0.309	=	=			01_4_SRSF1_Hela_GSE26463_repressed	M	0.517955	0.511905	0.526786	0.513756	[0,49874728380770506; 0,5286552035017907]	0.2925	0.2925	=	=

## Sheet: Dinucleotides
Project	dnt_info	frequencies_of_the_interest_set	frequencies_interest_set_5p	frequencies_interest_set_3p	average_frequencies_of_the_10000_sets		p_values_like	BH_pcor	regulation_(p<=0,05)	reg(p_cor<=0,05)			Project	dnt_info	frequencies_of_the_interest_set	frequencies_interest_set_5p	frequencies_interest_set_3p	average_frequencies_of_the_10000_sets	IC_95_of_the_10000_sets	p_values_like	BH_pcor	regulation_(p<=0,05)	reg(p_cor<=0,05)			Project	dnt_info	frequencies_of_the_interest_set	frequencies_interest_set_5p	frequencies_interest_set_3p	average_frequencies_of_the_10000_sets	IC_95_of_the_10000_sets	p_values_like	BH_pcor	regulation_(p<=0,05)	reg(p_cor<=0,05)			Project	dnt_info	frequencies_of_the_interest_set	frequencies_interest_set_5p	frequencies_interest_set_3p	average_frequencies_of_the_10000_sets	IC_95_of_the_10000_sets	p_values_like	BH_pcor	regulation_(p<=0,05)	reg(p_cor<=0,05)
01_1_SRSF1_K562_ENCSR066VOO_activated	AA	0.0703755	0.072848	0.072848	0.0793426	-11.3017	0	0	-	-			01_2_SRSF1_HepG2_ENCSR094KBY_activated	AA	0.0735848	0.075258	0.0766423	0.0795411	-7.48829	0.0018	0.00576	-	-			01_3_SRSF1_GM19238_GSE52834_activated	AA	0.074758	0.0737036	0.0713346	0.0793492	-5.78606	0.1461	0.23376	=	=			01_4_SRSF1_Hela_GSE26463_activated	AA	0.0698133	0.0782351	0.0765666	0.0799841	-12.7159	0.002	0.00457143	-	-
01_1_SRSF1_K562_ENCSR066VOO_activated	AC	0.0545894	0.0538953	0.0570626	0.0553609	-1.39357	0.1709	0.210338	=	=			01_2_SRSF1_HepG2_ENCSR094KBY_activated	AC	0.0553685	0.0527939	0.0566952	0.0553375	0.0560817	0.4812	0.4812	=	=			01_3_SRSF1_GM19238_GSE52834_activated	AC	0.0592941	0.054488	0.06607	0.0553487	7.12822	0.0173	0.0692	+	=			01_4_SRSF1_Hela_GSE26463_activated	AC	0.0550211	0.0491287	0.0617353	0.0553162	-0.533551	0.426	0.4544	=	=
01_1_SRSF1_K562_ENCSR066VOO_activated	AG	0.0860341	0.0785185	0.0975223	0.0812496	5.88864	0	0	+	+			01_2_SRSF1_HepG2_ENCSR094KBY_activated	AG	0.0859259	0.0832494	0.0965266	0.0814092	5.54814	0.0001	0.000533333	+	+			01_3_SRSF1_GM19238_GSE52834_activated	AG	0.0867404	0.0863385	0.098447	0.0815111	6.41546	0.0223	0.07136	+	=			01_4_SRSF1_Hela_GSE26463_activated	AG	0.0927547	0.0910271	0.105858	0.0814479	13.8822	0	0	+	+
01_1_SRSF1_K562_ENCSR066VOO_activated	AT	0.0553128	0.0581865	0.0530779	0.0584269	-5.32994	0.0036	0.0096	-	-			01_2_SRSF1_HepG2_ENCSR094KBY_activated	AT	0.0595464	0.0575761	0.0569469	0.0584262	1.91724	0.1839	0.267491	=	=			01_3_SRSF1_GM19238_GSE52834_activated	AT	0.0605913	0.060279	0.0526454	0.0581423	4.21197	0.1669	0.242764	=	=			01_4_SRSF1_Hela_GSE26463_activated	AT	0.0528999	0.0569151	0.0485725	0.0586622	-9.82291	0.0028	0.00497778	-	-
01_1_SRSF1_K562_ENCSR066VOO_activated	CA	0.0774132	0.074023	0.0821967	0.0793813	-2.47919	0.0193	0.0280727	-	-			01_2_SRSF1_HepG2_ENCSR094KBY_activated	CA	0.0805117	0.076894	0.0860181	0.0793786	1.42753	0.1428	0.22848	=	=			01_3_SRSF1_GM19238_GSE52834_activated	CA	0.0787309	0.0771256	0.0858121	0.0794538	-0.909776	0.3739	0.398827	=	=			01_4_SRSF1_Hela_GSE26463_activated	CA	0.0805458	0.0743419	0.0893585	0.0793032	1.567	0.2465	0.303385	=	=
01_1_SRSF1_K562_ENCSR066VOO_activated	CC	0.0671915	0.0660026	0.0670243	0.0676244	-0.640241	0.3919	0.418027	=	=			01_2_SRSF1_HepG2_ENCSR094KBY_activated	CC	0.0665363	0.0646866	0.0655047	0.067626	-1.61134	0.2641	0.325046	=	=			01_3_SRSF1_GM19238_GSE52834_activated	CC	0.0619016	0.0589629	0.0558042	0.0681841	-9.214	0.0335	0.0870857	*	=			01_4_SRSF1_Hela_GSE26463_activated	CC	0.0674512	0.0593252	0.0661846	0.0672399	0.314276	0.4663	0.4663	=	=
01_1_SRSF1_K562_ENCSR066VOO_activated	CG	0.0253043	0.0236526	0.0254406	0.026791	-5.54922	0.0446	0.0594667	*	=			01_2_SRSF1_HepG2_ENCSR094KBY_activated	CG	0.0239362	0.0225271	0.0259879	0.0267451	-10.5025	0.0027	0.0072	-	-			01_3_SRSF1_GM19238_GSE52834_activated	CG	0.0238106	0.0257963	0.0250066	0.0269418	-11.6221	0.0544	0.1088	=	=			01_4_SRSF1_Hela_GSE26463_activated	CG	0.0272251	0.025584	0.0248424	0.0265593	2.5067	0.3442	0.393371	=	=
01_1_SRSF1_K562_ENCSR066VOO_activated	CT	0.0711107	0.0701916	0.0706513	0.0688258	3.3198	0.0091	0.0208	+	+			01_2_SRSF1_HepG2_ENCSR094KBY_activated	CT	0.0682666	0.0683363	0.0657564	0.0687291	-0.672955	0.3366	0.384686	=	=			01_3_SRSF1_GM19238_GSE52834_activated	CT	0.0681996	0.0663332	0.0692287	0.0687474	-0.796781	0.403	0.403	=	=			01_4_SRSF1_Hela_GSE26463_activated	CT	0.0667758	0.0637746	0.06637	0.0686351	-2.70898	0.1585	0.211333	=	=
01_1_SRSF1_K562_ENCSR066VOO_activated	GA	0.0833998	0.0801533	0.0874074	0.0790454	5.50879	0.0002	0.00064	+	+			01_2_SRSF1_HepG2_ENCSR094KBY_activated	GA	0.0809793	0.0812988	0.0831236	0.0791681	2.28774	0.0726	0.1452	=	=			01_3_SRSF1_GM19238_GSE52834_activated	GA	0.0859302	0.086865	0.0844959	0.0790916	8.64647	0.0043	0.0344	+	+			01_4_SRSF1_Hela_GSE26463_activated	GA	0.0862644	0.0880608	0.0901001	0.0793203	8.75457	0.0009	0.00288	+	+
01_1_SRSF1_K562_ENCSR066VOO_activated	GC	0.0626045	0.0608429	0.0612005	0.0617305	1.41577	0.2294	0.262171	=	=			01_2_SRSF1_HepG2_ENCSR094KBY_activated	GC	0.0617911	0.0614145	0.0615404	0.061622	0.274443	0.4469	0.476693	=	=			01_3_SRSF1_GM19238_GSE52834_activated	GC	0.0558376	0.0629113	0.0573835	0.0619094	-9.80755	0.0109	0.0581333	-	=			01_4_SRSF1_Hela_GSE26463_activated	GC	0.0653661	0.0622914	0.0628476	0.0612907	6.64925	0.0372	0.05952	*	=
01_1_SRSF1_K562_ENCSR066VOO_activated	GG	0.0805925	0.0821967	0.0770881	0.0653061	23.4073	0	0	+	+			01_2_SRSF1_HepG2_ENCSR094KBY_activated	GG	0.0774488	0.0800403	0.0739366	0.065349	18.5157	0	0	+	+			01_3_SRSF1_GM19238_GSE52834_activated	GG	0.0743972	0.0739668	0.0734404	0.0655675	13.4666	0.0021	0.0336	+	+			01_4_SRSF1_Hela_GSE26463_activated	GG	0.0878198	0.0912125	0.0849092	0.0650962	34.9077	0	0	+	+
01_1_SRSF1_K562_ENCSR066VOO_activated	GT	0.0426581	0.0491954	0.0339208	0.0463085	-7.8827	0.0001	0.0004	-	-			01_2_SRSF1_HepG2_ENCSR094KBY_activated	GT	0.0418206	0.0461238	0.0347345	0.0462628	-9.60208	0	0	-	-			01_3_SRSF1_GM19238_GSE52834_activated	GT	0.0429933	0.0442222	0.0394841	0.0461465	-6.83291	0.0381	0.0870857	*	=			01_4_SRSF1_Hela_GSE26463_activated	GT	0.0387738	0.0433815	0.0296626	0.0462673	-16.1959	0	0	-	-
01_1_SRSF1_K562_ENCSR066VOO_activated	TA	0.033019	0.0335632	0.0326948	0.0350894	-5.90033	0.0112	0.0224	-	-			01_2_SRSF1_HepG2_ENCSR094KBY_activated	TA	0.0361969	0.0346086	0.036811	0.0350625	3.23552	0.1349	0.22848	=	=			01_3_SRSF1_GM19238_GSE52834_activated	TA	0.0360428	0.0342195	0.0384312	0.0348355	3.46589	0.2821	0.3472	=	=			01_4_SRSF1_Hela_GSE26463_activated	TA	0.032728	0.0322581	0.0317019	0.0352512	-7.15785	0.0734	0.106764	=	=
01_1_SRSF1_K562_ENCSR066VOO_activated	TC	0.0550264	0.0556833	0.0520562	0.0569403	-3.36126	0.0177	0.0280727	-	-			01_2_SRSF1_HepG2_ENCSR094KBY_activated	TC	0.0543912	0.0554367	0.0523534	0.0569075	-4.42177	0.0059	0.0134857	-	-			01_3_SRSF1_GM19238_GSE52834_activated	TC	0.054197	0.0529087	0.0494867	0.0568967	-4.74498	0.0933	0.165867	=	=			01_4_SRSF1_Hela_GSE26463_activated	TC	0.0517714	0.0520949	0.0478309	0.0568936	-9.00311	0.0019	0.00457143	-	-
01_1_SRSF1_K562_ENCSR066VOO_activated	TG	0.0817707	0.0846488	0.0779566	0.0818805	-0.134013	0.4543	0.4543	=	=			01_2_SRSF1_HepG2_ENCSR094KBY_activated	TG	0.0780727	0.0789076	0.0736219	0.0817966	-4.55263	0.0004	0.0016	-	-			01_3_SRSF1_GM19238_GSE52834_activated	TG	0.0826705	0.0797578	0.0763359	0.0816429	1.25864	0.3272	0.373943	=	=			01_4_SRSF1_Hela_GSE26463_activated	TG	0.0748913	0.0765666	0.070634	0.0817745	-8.41724	0.0001	0.0004	-	-
01_1_SRSF1_K562_ENCSR066VOO_activated	TT	0.0535975	0.0563985	0.0518519	0.0566969	-5.46661	0.0133	0.0236444	-	-			01_2_SRSF1_HepG2_ENCSR094KBY_activated	TT	0.0556229	0.0608482	0.0538007	0.0566387	-1.79355	0.2536	0.325046	=	=			01_3_SRSF1_GM19238_GSE52834_activated	TT	0.0539048	0.0621216	0.0565938	0.0562316	-4.13778	0.2325	0.31	=	=			01_4_SRSF1_Hela_GSE26463_activated	TT	0.0498981	0.0558027	0.0428254	0.0569583	-12.3953	0.0026	0.00497778	-	-
Project	dnt_info	frequencies_of_the_interest_set	frequencies_interest_set_5p	frequencies_interest_set_3p	average_frequencies_of_the_10000_sets		p_values_like	BH_pcor	regulation_(p<=0,05)	reg(p_cor<=0,05)			Project	dnt_info	frequencies_of_the_interest_set	frequencies_interest_set_5p	frequencies_interest_set_3p	average_frequencies_of_the_10000_sets		p_values_like	BH_pcor	regulation_(p<=0,05)	reg(p_cor<=0,05)			Project	dnt_info	frequencies_of_the_interest_set	frequencies_interest_set_5p	frequencies_interest_set_3p	average_frequencies_of_the_10000_sets		p_values_like	BH_pcor	regulation_(p<=0,05)	reg(p_cor<=0,05)			Project	dnt_info	frequencies_of_the_interest_set	frequencies_interest_set_5p	frequencies_interest_set_3p	average_frequencies_of_the_10000_sets		p_values_like	BH_pcor	regulation_(p<=0,05)	reg(p_cor<=0,05)
01_1_SRSF1_K562_ENCSR066VOO_repressed	AA	0.0935481	0.0890474	0.104241	0.0839352	11.4528	0.0014	0.00248889	+	+			01_2_SRSF1_HepG2_ENCSR094KBY_repressed	AA	0.0802251	0.0772532	0.0886488	0.083544	-3.97267	0.1662	0.204554	=	=			01_3_SRSF1_GM19238_GSE52834_repressed	AA	0.0791526	0.0788177	0.08867	0.0808187	-2.06162	0.3924	0.448457	=	=			01_4_SRSF1_Hela_GSE26463_repressed	AA	0.0710447	0.0665025	0.0732759	0.0831728	-14.5818	0.0337	0.0898667	*	=
01_1_SRSF1_K562_ENCSR066VOO_repressed	AC	0.0572575	0.0565464	0.0595851	0.0547873	4.50874	0.0412	0.0507077	*	=			01_2_SRSF1_HepG2_ENCSR094KBY_repressed	AC	0.0531032	0.0529821	0.0597898	0.0548671	-3.21488	0.1167	0.169745	=	=			01_3_SRSF1_GM19238_GSE52834_repressed	AC	0.0549509	0.0488133	0.0635916	0.0551667	-0.391196	0.4653	0.472	=	=			01_4_SRSF1_Hela_GSE26463_repressed	AC	0.0526245	0.0486453	0.0621921	0.0548788	-4.10764	0.23	0.293785	=	=
01_1_SRSF1_K562_ENCSR066VOO_repressed	AG	0.0855381	0.0786101	0.0965781	0.0830467	3.00003	0.0954	0.10176	=	=			01_2_SRSF1_HepG2_ENCSR094KBY_repressed	AG	0.0824178	0.0771052	0.0919047	0.0827978	-0.45888	0.433	0.433	=	=			01_3_SRSF1_GM19238_GSE52834_repressed	AG	0.0852537	0.0819525	0.0940439	0.0817826	4.24434	0.1496	0.277511	=	=			01_4_SRSF1_Hela_GSE26463_repressed	AG	0.0774155	0.0812808	0.0899015	0.0826442	-6.32672	0.0977	0.15632	=	=
01_1_SRSF1_K562_ENCSR066VOO_repressed	AT	0.0707432	0.0664553	0.0622275	0.0603392	17.2425	0	0	+	+			01_2_SRSF1_HepG2_ENCSR094KBY_repressed	AT	0.0675823	0.0640817	0.056534	0.0602297	12.2076	0	0	+	+			01_3_SRSF1_GM19238_GSE52834_repressed	AT	0.0557058	0.0631438	0.0519481	0.059124	-5.78152	0.1561	0.277511	=	=			01_4_SRSF1_Hela_GSE26463_repressed	AT	0.0540677	0.0597291	0.0455665	0.0600489	-9.96048	0.0626	0.1252	=	=
01_1_SRSF1_K562_ENCSR066VOO_repressed	CA	0.0832273	0.0780816	0.0965781	0.0788088	5.60666	0.0037	0.00592	+	+			01_2_SRSF1_HepG2_ENCSR094KBY_repressed	CA	0.079694	0.0757733	0.0916087	0.0788434	1.07882	0.3078	0.32832	=	=			01_3_SRSF1_GM19238_GSE52834_repressed	CA	0.0735114	0.0604568	0.0873265	0.0791866	-7.1669	0.0252	0.08064	*	=			01_4_SRSF1_Hela_GSE26463_repressed	CA	0.0840876	0.0831281	0.0929803	0.0789333	6.52991	0.0717	0.127467	=	=
01_1_SRSF1_K562_ENCSR066VOO_repressed	CC	0.0590878	0.0566786	0.0613027	0.0651201	-9.26329	0.0059	0.00858182	-	-			01_2_SRSF1_HepG2_ENCSR094KBY_repressed	CC	0.0624433	0.0664496	0.0614178	0.0652774	-4.34165	0.1384	0.184533	=	=			01_3_SRSF1_GM19238_GSE52834_repressed	CC	0.0704557	0.080609	0.0640394	0.0667528	5.54711	0.2076	0.310691	=	=			01_4_SRSF1_Hela_GSE26463_repressed	CC	0.0782147	0.0788177	0.0708128	0.065539	19.3407	0.0114	0.03648	+	+
01_1_SRSF1_K562_ENCSR066VOO_repressed	CG	0.0177683	0.0182323	0.0177038	0.0249891	-28.8959	0	0	-	-			01_2_SRSF1_HepG2_ENCSR094KBY_repressed	CG	0.0212332	0.0213112	0.0190913	0.0251607	-15.6096	0.0025	0.005	-	-			01_3_SRSF1_GM19238_GSE52834_repressed	CG	0.0252703	0.0273175	0.0214957	0.0261918	-3.51816	0.3719	0.448457	=	=			01_4_SRSF1_Hela_GSE26463_repressed	CG	0.0265628	0.0240148	0.0258621	0.0253307	4.864	0.3296	0.3296	=	=
01_1_SRSF1_K562_ENCSR066VOO_repressed	CT	0.0663318	0.0710794	0.065002	0.0673392	-1.49594	0.2791	0.2791	=	=			01_2_SRSF1_HepG2_ENCSR094KBY_repressed	CT	0.0716113	0.0734054	0.0704455	0.0674885	6.10882	0.0097	0.0172444	+	+			01_3_SRSF1_GM19238_GSE52834_repressed	CT	0.0681448	0.0618003	0.070309	0.0683467	-0.295476	0.472	0.472	=	=			01_4_SRSF1_Hela_GSE26463_repressed	CT	0.0738996	0.067734	0.0800493	0.0675734	9.36191	0.0401	0.0916571	*	=
01_1_SRSF1_K562_ENCSR066VOO_repressed	GA	0.0736872	0.0751751	0.0671159	0.0811994	-9.25148	0	0	-	-			01_2_SRSF1_HepG2_ENCSR094KBY_repressed	GA	0.0679822	0.0705935	0.0676336	0.0809832	-16.054	0	0	-	-			01_3_SRSF1_GM19238_GSE52834_repressed	GA	0.0748473	0.0824004	0.0707568	0.0797065	-6.09633	0.0751	0.200267	=	=			01_4_SRSF1_Hela_GSE26463_repressed	GA	0.0664365	0.0621921	0.0603448	0.0807445	-17.7201	0.0001	0.0008	-	-
01_1_SRSF1_K562_ENCSR066VOO_repressed	GC	0.0478812	0.0508654	0.0478267	0.058468	-18.107	0	0	-	-			01_2_SRSF1_HepG2_ENCSR094KBY_repressed	GC	0.0548363	0.056682	0.0515021	0.0587229	-6.61863	0.0205	0.0328	-	-			01_3_SRSF1_GM19238_GSE52834_repressed	GC	0.0524426	0.0497089	0.0488133	0.0606121	-13.4783	0.0073	0.0292	-	-			01_4_SRSF1_Hela_GSE26463_repressed	GC	0.0618408	0.0800493	0.0523399	0.0590283	4.7646	0.2387	0.293785	=	=
01_1_SRSF1_K562_ENCSR066VOO_repressed	GG	0.0422218	0.0474303	0.0406923	0.0641829	-34.2163	0	0	-	-			01_2_SRSF1_HepG2_ENCSR094KBY_repressed	GG	0.0510615	0.0534261	0.0513542	0.064181	-20.4414	0	0	-	-			01_3_SRSF1_GM19238_GSE52834_repressed	GG	0.0512338	0.0577698	0.0483654	0.0648976	-21.0543	0.0002	0.00106667	-	-			01_4_SRSF1_Hela_GSE26463_repressed	GG	0.0507704	0.046798	0.0554187	0.0643178	-21.0632	0.0008	0.00426667	-	-
01_1_SRSF1_K562_ENCSR066VOO_repressed	GT	0.0505174	0.0536398	0.0417492	0.0458962	10.0686	0.0005	0.00114286	+	+			01_2_SRSF1_HepG2_ENCSR094KBY_repressed	GT	0.0524934	0.055794	0.0451384	0.0459628	14.2084	0	0	+	+			01_3_SRSF1_GM19238_GSE52834_repressed	GT	0.0614714	0.0613524	0.0488133	0.0461739	33.1303	0	0	+	+			01_4_SRSF1_Hela_GSE26463_repressed	GT	0.0588328	0.0591133	0.0492611	0.0459986	27.9013	0	0	+	+
01_1_SRSF1_K562_ENCSR066VOO_repressed	TA	0.0500698	0.045977	0.0512617	0.0358665	39.6003	0	0	+	+			01_2_SRSF1_HepG2_ENCSR094KBY_repressed	TA	0.04672	0.0457304	0.0452864	0.0358741	30.2334	0	0	+	+			01_3_SRSF1_GM19238_GSE52834_repressed	TA	0.0475777	0.0465741	0.0447828	0.0353797	34.4773	0	0	+	+			01_4_SRSF1_Hela_GSE26463_repressed	TA	0.0448054	0.0461823	0.0418719	0.0357319	25.3933	0.0034	0.0136	+	+
01_1_SRSF1_K562_ENCSR066VOO_repressed	TC	0.0591204	0.0628881	0.0609063	0.0566052	4.44335	0.0527	0.0602286	=	=			01_2_SRSF1_HepG2_ENCSR094KBY_repressed	TC	0.0625694	0.0621578	0.0611218	0.056656	10.4373	0.0001	0.000266667	+	+			01_3_SRSF1_GM19238_GSE52834_repressed	TC	0.0585213	0.0555307	0.0555307	0.0568742	2.89616	0.2733	0.3644	=	=			01_4_SRSF1_Hela_GSE26463_repressed	TC	0.0601483	0.0535714	0.0714286	0.0567123	6.05864	0.1438	0.209164	=	=
01_1_SRSF1_K562_ENCSR066VOO_repressed	TG	0.0781882	0.0780816	0.0620954	0.0814868	-4.04803	0.0292	0.0389333	*	*			01_2_SRSF1_HepG2_ENCSR094KBY_repressed	TG	0.0803031	0.0808051	0.0726654	0.0815287	-1.50329	0.2587	0.295657	=	=			01_3_SRSF1_GM19238_GSE52834_repressed	TG	0.0793061	0.0797134	0.0747873	0.0817545	-2.99485	0.2136	0.310691	=	=			01_4_SRSF1_Hela_GSE26463_repressed	TG	0.0838306	0.0843596	0.0683498	0.0815604	2.78354	0.2665	0.304571	=	=
01_1_SRSF1_K562_ENCSR066VOO_repressed	TT	0.0648117	0.0712115	0.0651341	0.0579294	11.8806	0.001	0.002	+	+			01_2_SRSF1_HepG2_ENCSR094KBY_repressed	TT	0.0657239	0.0664496	0.0658576	0.0578826	13.5468	0.0009	0.00205714	+	+			01_3_SRSF1_GM19238_GSE52834_repressed	TT	0.0621547	0.0640394	0.0667264	0.0572317	8.60202	0.1195	0.273143	=	=			01_4_SRSF1_Hela_GSE26463_repressed	TT	0.0554181	0.0578818	0.0603448	0.0577852	-4.09629	0.3207	0.3296	=	=

## Sheet: Codons
Project	codon	tRNA	amino_acid	frequencies_of_the_interest_set	frequencies_interest_set_5p	frequencies_interest_set_3p	average_frequencies_of_the_10000_sets		p_values_like	FDR	regulation_(p<=0,05)	regulation(fdr<=0,05)			Project	codon	tRNA	amino_acid	frequencies_of_the_interest_set	frequencies_interest_set_5p	frequencies_interest_set_3p	average_frequencies_of_the_10000_sets		p_values_like	FDR	regulation_(p<=0,05)	regulation(fdr<=0,05)			Project	codon	tRNA	amino_acid	frequencies_of_the_interest_set	frequencies_interest_set_5p	frequencies_interest_set_3p	average_frequencies_of_the_10000_sets		p_values_like	FDR	regulation_(p<=0,05)	regulation(fdr<=0,05)			Project	codon	tRNA	amino_acid	frequencies_of_the_interest_set
01_1_SRSF1_K562_ENCSR066VOO_activated	AAA	TTT	K	0.0248962	0.0253333	0.0260741	0.0285056	-12.6619	0.0028	0.00746667	-	-			01_2_SRSF1_HepG2_ENCSR094KBY_activated	AAA	TTT	K	0.0253682	0.0243144	0.0274223	0.0285821	-11.2444	0.0109	0.03488	-	-			01_3_SRSF1_GM19238_GSE52834_activated	AAA	TTT	K	0.0272182	0.0221374	0.0244275	0.0284797	-4.42956	0.3336	0.419	=	=			01_4_SRSF1_Hela_GSE26463_activated	AAA	TTT	K	0.0252443
01_1_SRSF1_K562_ENCSR066VOO_activated	AAC	GTT	N	0.0148062	0.0157037	0.0152593	0.0196037	-24.4724	0	0	-	-			01_2_SRSF1_HepG2_ENCSR094KBY_activated	AAC	GTT	N	0.0149671	0.0160878	0.0140768	0.0195735	-23.5338	0	0	-	-			01_3_SRSF1_GM19238_GSE52834_activated	AAC	GTT	N	0.0169451	0.0198473	0.0198473	0.0195434	-13.2953	0.0995	0.199	=	=			01_4_SRSF1_Hela_GSE26463_activated	AAC	GTT	N	0.0163013
01_1_SRSF1_K562_ENCSR066VOO_activated	AAG	CTT,TTT	K	0.0290763	0.0306667	0.0342222	0.0341437	-14.8416	0.0001	0.0004	-	-			01_2_SRSF1_HepG2_ENCSR094KBY_activated	AAG	CTT,TTT	K	0.0312154	0.0332724	0.0351005	0.0341871	-8.69238	0.0189	0.0359111	-	-			01_3_SRSF1_GM19238_GSE52834_activated	AAG	CTT,TTT	K	0.0253364	0.0267176	0.0274809	0.034175	-25.8626	0.0007	0.0088	-	-			01_4_SRSF1_Hela_GSE26463_activated	AAG	CTT,TTT	K	0.0290255
01_1_SRSF1_K562_ENCSR066VOO_activated	AAT	GTT	N	0.0162723	0.0182222	0.0139259	0.0197757	-17.7158	0.0002	0.00064	-	-			01_2_SRSF1_HepG2_ENCSR094KBY_activated	AAT	GTT	N	0.0176234	0.0177331	0.0180987	0.01979	-10.9479	0.0202	0.0359111	-	-			01_3_SRSF1_GM19238_GSE52834_activated	AAT	GTT	N	0.0180562	0.0175573	0.0137405	0.0196875	-8.286	0.2276	0.36416	=	=			01_4_SRSF1_Hela_GSE26463_activated	AAT	GTT	N	0.0143439
01_1_SRSF1_K562_ENCSR066VOO_activated	ACA	IGT,TGT	T	0.0159932	0.0158519	0.0168889	0.0162284	-1.44891	0.3919	0.3919	=	=			01_2_SRSF1_HepG2_ENCSR094KBY_activated	ACA	IGT,TGT	T	0.0182742	0.0190128	0.0179159	0.0162652	12.3517	0.0165	0.0359111	+	+			01_3_SRSF1_GM19238_GSE52834_activated	ACA	IGT,TGT	T	0.0177321	0.0145038	0.019084	0.0162252	9.28741	0.2107	0.36416	=	=			01_4_SRSF1_Hela_GSE26463_activated	ACA	IGT,TGT	T	0.0169408
01_1_SRSF1_K562_ENCSR066VOO_activated	ACC	IGT,GGT	T	0.0156606	0.013037	0.0165926	0.0172359	-9.13967	0.034	0.0777143	*	=			01_2_SRSF1_HepG2_ENCSR094KBY_activated	ACC	IGT,GGT	T	0.0147581	0.0115174	0.0162706	0.0172129	-14.2618	0.0044	0.0176	-	-			01_3_SRSF1_GM19238_GSE52834_activated	ACC	IGT,GGT	T	0.0140312	0.0129771	0.0152672	0.0172801	-18.8015	0.0427	0.113867	*	=			01_4_SRSF1_Hela_GSE26463_activated	ACC	IGT,GGT	T	0.015142
01_1_SRSF1_K562_ENCSR066VOO_activated	ACG	CGT,TGT	T	0.00604587	0.00607407	0.00651852	0.00557434	8.45889	0.1654	0.240582	=	=			01_2_SRSF1_HepG2_ENCSR094KBY_activated	ACG	CGT,TGT	T	0.00464178	0.00493601	0.00548446	0.00557211	-16.6962	0.0358	0.05728	*	=			01_3_SRSF1_GM19238_GSE52834_activated	ACG	CGT,TGT	T	0.0057899	0.00687023	0.00687023	0.00560436	3.31054	0.419	0.419	=	=			01_4_SRSF1_Hela_GSE26463_activated	ACG	CGT,TGT	T	0.00453595
01_1_SRSF1_K562_ENCSR066VOO_activated	ACT	IGT,GGT	T	0.0142699	0.0133333	0.0145185	0.0133796	6.65432	0.1163	0.19424	=	=			01_2_SRSF1_HepG2_ENCSR094KBY_activated	ACT	IGT,GGT	T	0.0128139	0.0117002	0.0120658	0.0133629	-4.10833	0.2611	0.278507	=	=			01_3_SRSF1_GM19238_GSE52834_activated	ACT	IGT,GGT	T	0.0159354	0.0167939	0.0175573	0.0133614	19.2641	0.066	0.150857	=	=			01_4_SRSF1_Hela_GSE26463_activated	ACT	IGT,GGT	T	0.0130149
01_1_SRSF1_K562_ENCSR066VOO_activated	AGA	TCT	R	0.0128438	0.010963	0.0146667	0.0124463	3.19375	0.3061	0.376738	=	=			01_2_SRSF1_HepG2_ENCSR094KBY_activated	AGA	TCT	R	0.0133171	0.0135283	0.0151737	0.0125046	6.49775	0.1786	0.204114	=	=			01_3_SRSF1_GM19238_GSE52834_activated	AGA	TCT	R	0.0169318	0.0198473	0.0167939	0.0124535	35.9605	0.0083	0.0332	+	+			01_4_SRSF1_Hela_GSE26463_activated	AGA	TCT	R	0.012826
01_1_SRSF1_K562_ENCSR066VOO_activated	AGC	GCT	S	0.0175892	0.0155556	0.0165926	0.0165566	6.23666	0.1214	0.19424	=	=			01_2_SRSF1_HepG2_ENCSR094KBY_activated	AGC	GCT	S	0.0176627	0.016819	0.0171846	0.0165233	6.89549	0.1229	0.163867	=	=			01_3_SRSF1_GM19238_GSE52834_activated	AGC	GCT	S	0.016026	0.0167939	0.0175573	0.0167186	-4.14259	0.3766	0.419	=	=			01_4_SRSF1_Hela_GSE26463_activated	AGC	GCT	S	0.0204161
01_1_SRSF1_K562_ENCSR066VOO_activated	AGG	CCT,TCT	R	0.0147623	0.0125926	0.0177778	0.00996578	48.1296	0	0	+	+			01_2_SRSF1_HepG2_ENCSR094KBY_activated	AGG	CCT,TCT	R	0.0148287	0.0142596	0.0120658	0.00999424	48.3726	0	0	+	+			01_3_SRSF1_GM19238_GSE52834_activated	AGG	CCT,TCT	R	0.0142078	0.00992366	0.0145038	0.0100284	41.6757	0.0033	0.0176	+	+			01_4_SRSF1_Hela_GSE26463_activated	AGG	CCT,TCT	R	0.0166079
01_1_SRSF1_K562_ENCSR066VOO_activated	AGT	GCT	S	0.0130398	0.013037	0.0112593	0.0119408	9.20326	0.0591	0.1182	=	=			01_2_SRSF1_HepG2_ENCSR094KBY_activated	AGT	GCT	S	0.013642	0.0127971	0.0106033	0.011935	14.3026	0.0168	0.0359111	+	+			01_3_SRSF1_GM19238_GSE52834_activated	AGT	GCT	S	0.0153039	0.0145038	0.0152672	0.0119478	28.0899	0.0237	0.07584	+	=			01_4_SRSF1_Hela_GSE26463_activated	AGT	GCT	S	0.0138008
01_1_SRSF1_K562_ENCSR066VOO_activated	ATA	IAT,TAT	I	0.00849592	0.00740741	0.00918519	0.00899072	-5.5035	0.2187	0.2916	=	=			01_2_SRSF1_HepG2_ENCSR094KBY_activated	ATA	IAT,TAT	I	0.00992531	0.00859232	0.011883	0.00899764	10.3101	0.1019	0.148218	=	=			01_3_SRSF1_GM19238_GSE52834_activated	ATA	IAT,TAT	I	0.00925148	0.0114504	0.00916031	0.00893613	3.52886	0.4033	0.419	=	=			01_4_SRSF1_Hela_GSE26463_activated	ATA	IAT,TAT	I	0.00787978
01_1_SRSF1_K562_ENCSR066VOO_activated	ATC	IAT,GAT	I	0.0155505	0.0137778	0.0158519	0.0217754	-28.587	0	0	-	-			01_2_SRSF1_HepG2_ENCSR094KBY_activated	ATC	IAT,GAT	I	0.0169875	0.0146252	0.0177331	0.0217164	-21.7759	0	0	-	-			01_3_SRSF1_GM19238_GSE52834_activated	ATC	IAT,GAT	I	0.0147156	0.0152672	0.0122137	0.0216034	-31.8828	0.0011	0.0088	-	-			01_4_SRSF1_Hela_GSE26463_activated	ATC	IAT,GAT	I	0.0142317
01_1_SRSF1_K562_ENCSR066VOO_activated	ATG	CAT	M	0.0220724	0.0260741	0.02	0.0224768	-1.79901	0.3371	0.385257	=	=			01_2_SRSF1_HepG2_ENCSR094KBY_activated	ATG	CAT	M	0.0230012	0.026691	0.0190128	0.0224997	2.22911	0.3182	0.3182	=	=			01_3_SRSF1_GM19238_GSE52834_activated	ATG	CAT	M	0.0234726	0.0251908	0.0198473	0.0224375	4.61344	0.3137	0.419	=	=			01_4_SRSF1_Hela_GSE26463_activated	ATG	CAT	M	0.0206195
01_1_SRSF1_K562_ENCSR066VOO_activated	ATT	IAT,GAT	I	0.0190191	0.0180741	0.0194074	0.0193042	-1.47666	0.3855	0.3919	=	=			01_2_SRSF1_HepG2_ENCSR094KBY_activated	ATT	IAT,GAT	I	0.0203959	0.0212066	0.0197441	0.0192903	5.73133	0.1437	0.176862	=	=			01_3_SRSF1_GM19238_GSE52834_activated	ATT	IAT,GAT	I	0.0195695	0.0167939	0.0175573	0.0190604	2.67062	0.3981	0.419	=	=			01_4_SRSF1_Hela_GSE26463_activated	ATT	IAT,GAT	I	0.018233
01_1_SRSF1_K562_ENCSR066VOO_activated	CAA	TTG	Q	0.0139072	0.0143704	0.0122963	0.0137917	0.8377	0.4374	0.4374	=	=			01_2_SRSF1_HepG2_ENCSR094KBY_activated	CAA	TTG	Q	0.0149527	0.0151737	0.013894	0.013856	7.91544	0.119	0.20825	=	=			01_3_SRSF1_GM19238_GSE52834_activated	CAA	TTG	Q	0.0185541	0.0198473	0.0137405	0.0137997	34.4532	0.0085	0.0595	+	=			01_4_SRSF1_Hela_GSE26463_activated	CAA	TTG	Q	0.0145364
01_1_SRSF1_K562_ENCSR066VOO_activated	CAC	GTG	H	0.0143599	0.014963	0.0157037	0.0137814	4.19727	0.224	0.4374	=	=			01_2_SRSF1_HepG2_ENCSR094KBY_activated	CAC	GTG	H	0.0143877	0.0127971	0.0157221	0.0137394	4.71862	0.2228	0.283564	=	=			01_3_SRSF1_GM19238_GSE52834_activated	CAC	GTG	H	0.0138442	0.0122137	0.0152672	0.0137833	0.441775	0.4744	0.4744	=	=			01_4_SRSF1_Hela_GSE26463_activated	CAC	GTG	H	0.014605
01_1_SRSF1_K562_ENCSR066VOO_activated	CAG	CTG,TTG	Q	0.0365473	0.0340741	0.0365926	0.0345379	5.81768	0.0653	0.18284	=	=			01_2_SRSF1_HepG2_ENCSR094KBY_activated	CAG	CTG,TTG	Q	0.0364495	0.0363803	0.0427788	0.0345052	5.63485	0.088	0.205333	=	=			01_3_SRSF1_GM19238_GSE52834_activated	CAG	CTG,TTG	Q	0.0329545	0.0312977	0.0450382	0.0345699	-4.67268	0.2985	0.4382	=	=			01_4_SRSF1_Hela_GSE26463_activated	CAG	CTG,TTG	Q	0.0391936
01_1_SRSF1_K562_ENCSR066VOO_activated	CAT	GTG	H	0.0119246	0.013037	0.0133333	0.0116456	2.39575	0.3482	0.4374	=	=			01_2_SRSF1_HepG2_ENCSR094KBY_activated	CAT	GTG	H	0.0133056	0.0129799	0.0144424	0.0116185	14.5202	0.0185	0.08085	+	=			01_3_SRSF1_GM19238_GSE52834_activated	CAT	GTG	H	0.0123199	0.0145038	0.0129771	0.0116018	6.1893	0.3164	0.4382	=	=			01_4_SRSF1_Hela_GSE26463_activated	CAT	GTG	H	0.0126365
01_1_SRSF1_K562_ENCSR066VOO_activated	CCA	IGG,TGG	P	0.0164559	0.0167407	0.0165926	0.0166538	-1.18859	0.4147	0.4374	=	=			01_2_SRSF1_HepG2_ENCSR094KBY_activated	CCA	IGG,TGG	P	0.0187822	0.0180987	0.01883	0.0167416	12.1885	0.0231	0.08085	+	=			01_3_SRSF1_GM19238_GSE52834_activated	CCA	IGG,TGG	P	0.0182394	0.0167939	0.0167939	0.0168556	8.20951	0.2528	0.4382	=	=			01_4_SRSF1_Hela_GSE26463_activated	CCA	IGG,TGG	P	0.018056
01_1_SRSF1_K562_ENCSR066VOO_activated	CCC	IGG,GGG	P	0.0158295	0.014963	0.016	0.0156785	0.963433	0.4247	0.4374	=	=			01_2_SRSF1_HepG2_ENCSR094KBY_activated	CCC	IGG,GGG	P	0.0165151	0.0157221	0.0149909	0.0157017	5.18062	0.2057	0.283564	=	=			01_3_SRSF1_GM19238_GSE52834_activated	CCC	IGG,GGG	P	0.0167175	0.0129771	0.0114504	0.0159734	4.65851	0.3462	0.4382	=	=			01_4_SRSF1_Hela_GSE26463_activated	CCC	IGG,GGG	P	0.0161175
01_1_SRSF1_K562_ENCSR066VOO_activated	CCG	CGG,TGG	P	0.0056022	0.00533333	0.00562963	0.00459058	22.0367	0.0176	0.0821333	+	=			01_2_SRSF1_HepG2_ENCSR094KBY_activated	CCG	CGG,TGG	P	0.00473925	0.00566728	0.00438757	0.00462453	2.48071	0.4025	0.433462	=	=			01_3_SRSF1_GM19238_GSE52834_activated	CCG	CGG,TGG	P	0.00410415	0.00458015	0.00305344	0.00472552	-13.1494	0.2933	0.4382	=	=			01_4_SRSF1_Hela_GSE26463_activated	CCG	CGG,TGG	P	0.00438374
01_1_SRSF1_K562_ENCSR066VOO_activated	CCT	IGG,GGG	P	0.0184878	0.0171852	0.0161481	0.0167422	10.426	0.0312	0.1092	*	=			01_2_SRSF1_HepG2_ENCSR094KBY_activated	CCT	IGG,GGG	P	0.0181437	0.0184644	0.0160878	0.0168514	7.66882	0.1034	0.2068	=	=			01_3_SRSF1_GM19238_GSE52834_activated	CCT	IGG,GGG	P	0.0179451	0.0167939	0.0198473	0.0169236	6.03598	0.3096	0.4382	=	=			01_4_SRSF1_Hela_GSE26463_activated	CCT	IGG,GGG	P	0.018094
01_1_SRSF1_K562_ENCSR066VOO_activated	CGA	ICG,TCG	R	0.00566615	0.00592593	0.00518519	0.00683971	-17.158	0.0119	0.0821333	-	=			01_2_SRSF1_HepG2_ENCSR094KBY_activated	CGA	ICG,TCG	R	0.0051994	0.00566728	0.00511883	0.00683019	-23.8762	0.0023	0.0322	-	-			01_3_SRSF1_GM19238_GSE52834_activated	CGA	ICG,TCG	R	0.00737426	0.00763359	0.00763359	0.00679617	8.50615	0.3	0.4382	=	=			01_4_SRSF1_Hela_GSE26463_activated	CGA	ICG,TCG	R	0.00524362
01_1_SRSF1_K562_ENCSR066VOO_activated	CGC	ICG,GCG	R	0.00774812	0.00725926	0.00725926	0.00817066	-5.17148	0.2503	0.4374	=	=			01_2_SRSF1_HepG2_ENCSR094KBY_activated	CGC	ICG,GCG	R	0.0074761	0.00804388	0.00603291	0.00812634	-8.00167	0.1705	0.265222	=	=			01_3_SRSF1_GM19238_GSE52834_activated	CGC	ICG,GCG	R	0.00495823	0.00534351	0.00305344	0.00821138	-39.6175	0.0056	0.0595	-	=			01_4_SRSF1_Hela_GSE26463_activated	CGC	ICG,GCG	R	0.00832891
01_1_SRSF1_K562_ENCSR066VOO_activated	CGG	CCG,TCG	R	0.0106242	0.00918519	0.0103704	0.0103198	2.9491	0.3207	0.4374	=	=			01_2_SRSF1_HepG2_ENCSR094KBY_activated	CGG	CCG,TCG	R	0.010513	0.00804388	0.0106033	0.010266	2.40623	0.3693	0.43085	=	=			01_3_SRSF1_GM19238_GSE52834_activated	CGG	CCG,TCG	R	0.0107647	0.00839695	0.00992366	0.0103253	4.25494	0.3756	0.4382	=	=			01_4_SRSF1_Hela_GSE26463_activated	CGG	CCG,TCG	R	0.0115178
01_1_SRSF1_K562_ENCSR066VOO_activated	CGT	ICG,GCG	R	0.00336383	0.00281481	0.00296296	0.00463864	-27.4823	0.0006	0.0084	-	-			01_2_SRSF1_HepG2_ENCSR094KBY_activated	CGT	ICG,GCG	R	0.00383965	0.00420475	0.00402194	0.00463211	-17.108	0.0415	0.1162	*	=			01_3_SRSF1_GM19238_GSE52834_activated	CGT	ICG,GCG	R	0.00357724	0.00305344	0.00305344	0.00464249	-22.9457	0.1311	0.4382	=	=			01_4_SRSF1_Hela_GSE26463_activated	CGT	ICG,GCG	R	0.00438529
01_1_SRSF1_K562_ENCSR066VOO_activated	CTA	IAG,TAG	L	0.00766097	0.00814815	0.00844444	0.00791342	-3.19009	0.3374	0.4374	=	=			01_2_SRSF1_HepG2_ENCSR094KBY_activated	CTA	IAG,TAG	L	0.00946139	0.00968921	0.00968921	0.00791188	19.5845	0.0098	0.0686	+	=			01_3_SRSF1_GM19238_GSE52834_activated	CTA	IAG,TAG	L	0.00740211	0.00763359	0.00610687	0.00787936	-6.05686	0.3663	0.4382	=	=			01_4_SRSF1_Hela_GSE26463_activated	CTA	IAG,TAG	L	0.00864502
01_1_SRSF1_K562_ENCSR066VOO_activated	CTC	IAG,GAG	L	0.0185131	0.0154074	0.0197037	0.0182289	1.55903	0.3755	0.4374	=	=			01_2_SRSF1_HepG2_ENCSR094KBY_activated	CTC	IAG,GAG	L	0.0180146	0.0160878	0.0190128	0.0181629	-0.816795	0.4453	0.4453	=	=			01_3_SRSF1_GM19238_GSE52834_activated	CTC	IAG,GAG	L	0.0182862	0.0206107	0.0160305	0.0181879	0.540033	0.4672	0.4744	=	=			01_4_SRSF1_Hela_GSE26463_activated	CTC	IAG,GAG	L	0.0171469
01_1_SRSF1_K562_ENCSR066VOO_activated	CTG	CAG,TAG	L	0.0394881	0.0383704	0.0395556	0.0380541	3.76834	0.1642	0.20525	=	=			01_2_SRSF1_HepG2_ENCSR094KBY_activated	CTG	CAG,TAG	L	0.036835	0.0351005	0.0351005	0.0379465	-2.92901	0.2417	0.282808	=	=			01_3_SRSF1_GM19238_GSE52834_activated	CTG	CAG,TAG	L	0.0376748	0.029771	0.0374046	0.0379602	-0.751913	0.4731	0.4731	=	=			01_4_SRSF1_Hela_GSE26463_activated	CTG	CAG,TAG	L	0.035925
01_1_SRSF1_K562_ENCSR066VOO_activated	CTT	IAG,GAG	L	0.0140711	0.0136296	0.0145185	0.0150412	-6.44968	0.1189	0.162136	=	=			01_2_SRSF1_HepG2_ENCSR094KBY_activated	CTT	IAG,GAG	L	0.0152114	0.0166362	0.0151737	0.0150261	1.23349	0.4118	0.4118	=	=			01_3_SRSF1_GM19238_GSE52834_activated	CTT	IAG,GAG	L	0.0162586	0.0183206	0.0221374	0.0149362	8.85388	0.2309	0.432937	=	=			01_4_SRSF1_Hela_GSE26463_activated	CTT	IAG,GAG	L	0.0120806
01_1_SRSF1_K562_ENCSR066VOO_activated	GAA	TTC	E	0.0285244	0.0306667	0.0282963	0.0346159	-17.5973	0	0	-	-			01_2_SRSF1_HepG2_ENCSR094KBY_activated	GAA	TTC	E	0.0303897	0.0319927	0.028702	0.0346737	-12.3552	0.0034	0.01275	-	-			01_3_SRSF1_GM19238_GSE52834_activated	GAA	TTC	E	0.0308931	0.0312977	0.0358779	0.034604	-10.724	0.1319	0.3957	=	=			01_4_SRSF1_Hela_GSE26463_activated	GAA	TTC	E	0.0288158
01_1_SRSF1_K562_ENCSR066VOO_activated	GAC	GTC	D	0.0269799	0.0259259	0.0281481	0.0251384	7.32547	0.0379	0.0710625	*	=			01_2_SRSF1_HepG2_ENCSR094KBY_activated	GAC	GTC	D	0.0256553	0.0244973	0.0276051	0.0251289	2.0951	0.32	0.342857	=	=			01_3_SRSF1_GM19238_GSE52834_activated	GAC	GTC	D	0.0270083	0.0282443	0.0328244	0.0251821	7.25207	0.2161	0.432937	=	=			01_4_SRSF1_Hela_GSE26463_activated	GAC	GTC	D	0.0256679
01_1_SRSF1_K562_ENCSR066VOO_activated	GAG	TTC,CTC	E	0.046986	0.0380741	0.0554074	0.0389774	20.547	0	0	+	+			01_2_SRSF1_HepG2_ENCSR094KBY_activated	GAG	TTC,CTC	E	0.0446068	0.0404022	0.0497258	0.0389757	14.4478	0.0007	0.0035	+	+			01_3_SRSF1_GM19238_GSE52834_activated	GAG	TTC,CTC	E	0.0489063	0.0458015	0.0503817	0.0391038	25.068	0.0037	0.0185	+	+			01_4_SRSF1_Hela_GSE26463_activated	GAG	TTC,CTC	E	0.0536707
01_1_SRSF1_K562_ENCSR066VOO_activated	GAT	GTC	D	0.0281626	0.0302222	0.026963	0.0258336	9.01557	0.0207	0.0443571	+	+			01_2_SRSF1_HepG2_ENCSR094KBY_activated	GAT	GTC	D	0.0248588	0.0224863	0.0246801	0.0258457	-3.81856	0.2129	0.282808	=	=			01_3_SRSF1_GM19238_GSE52834_activated	GAT	GTC	D	0.025323	0.0244275	0.0160305	0.025702	-1.47466	0.4539	0.4731	=	=			01_4_SRSF1_Hela_GSE26463_activated	GAT	GTC	D	0.0269515
01_1_SRSF1_K562_ENCSR066VOO_activated	GCA	IGC,TGC	A	0.017394	0.0168889	0.0188148	0.0170215	2.18828	0.3294	0.3301	=	=			01_2_SRSF1_HepG2_ENCSR094KBY_activated	GCA	IGC,TGC	A	0.0182518	0.0184644	0.0210238	0.0170575	7.00167	0.112	0.21	=	=			01_3_SRSF1_GM19238_GSE52834_activated	GCA	IGC,TGC	A	0.0195193	0.0175573	0.0259542	0.017037	14.5701	0.105	0.39375	=	=			01_4_SRSF1_Hela_GSE26463_activated	GCA	IGC,TGC	A	0.0186526
01_1_SRSF1_K562_ENCSR066VOO_activated	GCC	IGC,GGC	A	0.0225908	0.0207407	0.0248889	0.0241781	-6.56495	0.0655	0.109167	=	=			01_2_SRSF1_HepG2_ENCSR094KBY_activated	GCC	IGC,GGC	A	0.0217507	0.0191956	0.0250457	0.0241005	-9.74992	0.0201	0.0603	-	=			01_3_SRSF1_GM19238_GSE52834_activated	GCC	IGC,GGC	A	0.0165687	0.0183206	0.0137405	0.0242873	-31.7806	0.0002	0.00225	-	-			01_4_SRSF1_Hela_GSE26463_activated	GCC	IGC,GGC	A	0.021344
01_1_SRSF1_K562_ENCSR066VOO_activated	GCG	CGC,TGC	A	0.00507295	0.00562963	0.00444444	0.00472686	7.32171	0.2361	0.272423	=	=			01_2_SRSF1_HepG2_ENCSR094KBY_activated	GCG	CGC,TGC	A	0.00427861	0.00457038	0.00511883	0.00474031	-9.73993	0.1929	0.282808	=	=			01_3_SRSF1_GM19238_GSE52834_activated	GCG	CGC,TGC	A	0.00511679	0.00458015	0.00610687	0.00481494	6.26899	0.373	0.46625	=	=			01_4_SRSF1_Hela_GSE26463_activated	GCG	CGC,TGC	A	0.0059272
01_1_SRSF1_K562_ENCSR066VOO_activated	GCT	IGC,GGC	A	0.0221356	0.024	0.0213333	0.0188547	17.4008	0.0001	0.0003	+	+			01_2_SRSF1_HepG2_ENCSR094KBY_activated	GCT	IGC,GGC	A	0.0195383	0.0206581	0.0186472	0.0188613	3.58951	0.2451	0.282808	=	=			01_3_SRSF1_GM19238_GSE52834_activated	GCT	IGC,GGC	A	0.0174595	0.0198473	0.0160305	0.0188287	-7.27174	0.2599	0.433167	=	=			01_4_SRSF1_Hela_GSE26463_activated	GCT	IGC,GGC	A	0.0229042
01_1_SRSF1_K562_ENCSR066VOO_activated	GGA	ICC,TCC	G	0.0266278	0.0278519	0.0306667	0.0178045	49.5563	0	0	+	+			01_2_SRSF1_HepG2_ENCSR094KBY_activated	GGA	ICC,TCC	G	0.0258198	0.0265082	0.0296161	0.0179514	43.8313	0	0	+	+			01_3_SRSF1_GM19238_GSE52834_activated	GGA	ICC,TCC	G	0.0272528	0.0343511	0.0290076	0.0178771	52.4451	0.0003	0.00225	+	+			01_4_SRSF1_Hela_GSE26463_activated	GGA	ICC,TCC	G	0.0349172
01_1_SRSF1_K562_ENCSR066VOO_activated	GGC	ICC,GCC	G	0.0205644	0.0213333	0.0195556	0.01845	11.4603	0.0129	0.03225	+	+			01_2_SRSF1_HepG2_ENCSR094KBY_activated	GGC	ICC,GCC	G	0.0197698	0.0186472	0.01883	0.0184495	7.15634	0.1073	0.21	=	=			01_3_SRSF1_GM19238_GSE52834_activated	GGC	ICC,GCC	G	0.0193668	0.019084	0.0221374	0.0186222	3.99884	0.3536	0.46625	=	=			01_4_SRSF1_Hela_GSE26463_activated	GGC	ICC,GCC	G	0.0208408
01_1_SRSF1_K562_ENCSR066VOO_activated	GGG	CCC,TCC	G	0.0177731	0.0164444	0.0157037	0.013439	32.2501	0	0	+	+			01_2_SRSF1_HepG2_ENCSR094KBY_activated	GGG	CCC,TCC	G	0.0175596	0.0190128	0.0160878	0.0134846	30.2194	0	0	+	+			01_3_SRSF1_GM19238_GSE52834_activated	GGG	CCC,TCC	G	0.0152842	0.0129771	0.0137405	0.013573	12.6072	0.1632	0.408	=	=			01_4_SRSF1_Hela_GSE26463_activated	GGG	CCC,TCC	G	0.0221605
01_1_SRSF1_K562_ENCSR066VOO_activated	GGT	ICC,GCC	G	0.00922457	0.0106667	0.00518519	0.0100894	-8.57178	0.1115	0.162136	=	=			01_2_SRSF1_HepG2_ENCSR094KBY_activated	GGT	ICC,GCC	G	0.00951578	0.0113346	0.00676417	0.0101687	-6.4209	0.2059	0.282808	=	=			01_3_SRSF1_GM19238_GSE52834_activated	GGT	ICC,GCC	G	0.00983813	0.00916031	0.00458015	0.0101558	-3.12839	0.4406	0.4731	=	=			01_4_SRSF1_Hela_GSE26463_activated	GGT	ICC,GCC	G	0.00877614
01_1_SRSF1_K562_ENCSR066VOO_activated	GTA	IAC,TAC	V	0.00781238	0.00874074	0.00533333	0.00807414	-3.24196	0.3301	0.3301	=	=			01_2_SRSF1_HepG2_ENCSR094KBY_activated	GTA	IAC,TAC	V	0.00893221	0.0100548	0.00822669	0.00808132	10.5291	0.1007	0.21	=	=			01_3_SRSF1_GM19238_GSE52834_activated	GTA	IAC,TAC	V	0.00749029	0.00763359	0.00687023	0.00802331	-6.64345	0.3611	0.46625	=	=			01_4_SRSF1_Hela_GSE26463_activated	GTA	IAC,TAC	V	0.00714935
01_1_SRSF1_K562_ENCSR066VOO_activated	GTC	IAC,GAC	V	0.0113992	0.0137778	0.00903704	0.0140598	-18.9233	0	0	-	-			01_2_SRSF1_HepG2_ENCSR094KBY_activated	GTC	IAC,GAC	V	0.01153	0.0117002	0.0100548	0.0140332	-17.8376	0.0009	0.00342	-	-			01_3_SRSF1_GM19238_GSE52834_activated	GTC	IAC,GAC	V	0.0115683	0.0145038	0.00763359	0.0140088	-17.4215	0.0726	0.126436	=	=			01_4_SRSF1_Hela_GSE26463_activated	GTC	IAC,GAC	V	0.0110633
01_1_SRSF1_K562_ENCSR066VOO_activated	GTG	CAC,TAC	V	0.0259235	0.0299259	0.0231111	0.0277368	-6.53737	0.0515	0.0752692	=	=			01_2_SRSF1_HepG2_ENCSR094KBY_activated	GTG	CAC,TAC	V	0.0237646	0.025777	0.020841	0.0276727	-14.1225	0.0006	0.00285	-	-			01_3_SRSF1_GM19238_GSE52834_activated	GTG	CAC,TAC	V	0.0239315	0.0274809	0.0221374	0.0276556	-13.4661	0.0666	0.126436	=	=			01_4_SRSF1_Hela_GSE26463_activated	GTG	CAC,TAC	V	0.0234173
01_1_SRSF1_K562_ENCSR066VOO_activated	GTT	IAC,GAC	V	0.0110626	0.0133333	0.00888889	0.0128202	-13.7098	0.0101	0.0213222	-	-			01_2_SRSF1_HepG2_ENCSR094KBY_activated	GTT	IAC,GAC	V	0.0124479	0.0146252	0.0106033	0.0128231	-2.92538	0.3363	0.354983	=	=			01_3_SRSF1_GM19238_GSE52834_activated	GTT	IAC,GAC	V	0.0111713	0.0114504	0.0122137	0.0127487	-12.3723	0.183	0.246493	=	=			01_4_SRSF1_Hela_GSE26463_activated	GTT	IAC,GAC	V	0.00966308
01_1_SRSF1_K562_ENCSR066VOO_activated	TAA	TTA	*	0.000565578	0	0.000888889	5.81696e-05	872.292	0	0	+	+			01_2_SRSF1_HepG2_ENCSR094KBY_activated	TAA	TTA	*	0.000322027	0	0	6.46134e-05	398.39	0.0041	0.0106875	+	+			01_3_SRSF1_GM19238_GSE52834_activated	TAA	TTA	*	0.000569286	0	0.000763359	7.05669e-05	706.732	0.0112	0.0411667	+	+			01_4_SRSF1_Hela_GSE26463_activated	TAA	TTA	*	0.000315756
01_1_SRSF1_K562_ENCSR066VOO_activated	TAC	GTA	Y	0.0129449	0.0146667	0.0134815	0.0152165	-14.9288	0.0018	0.0057	-	-			01_2_SRSF1_HepG2_ENCSR094KBY_activated	TAC	GTA	Y	0.0136854	0.0127971	0.0122486	0.0151547	-9.69545	0.0491	0.0777417	*	=			01_3_SRSF1_GM19238_GSE52834_activated	TAC	GTA	Y	0.0108006	0.00763359	0.0152672	0.0151319	-28.6238	0.0071	0.033725	-	-			01_4_SRSF1_Hela_GSE26463_activated	TAC	GTA	Y	0.0133927
01_1_SRSF1_K562_ENCSR066VOO_activated	TAG	CTA,TTA	*	0.00083878	0	0.00177778	4.64171e-05	1707.05	0	0	+	+			01_2_SRSF1_HepG2_ENCSR094KBY_activated	TAG	CTA,TTA	*	0.000699912	0	0.00146252	4.96821e-05	1308.78	0	0	+	+			01_3_SRSF1_GM19238_GSE52834_activated	TAG	CTA,TTA	*	0.000954714	0	0.00229008	5.30054e-05	1701.16	0.0004	0.0076	+	+			01_4_SRSF1_Hela_GSE26463_activated	TAG	CTA,TTA	*	0.000315756
01_1_SRSF1_K562_ENCSR066VOO_activated	TAT	GTA	Y	0.011773	0.0118519	0.012	0.0139508	-15.6102	0.003	0.00814286	-	-			01_2_SRSF1_HepG2_ENCSR094KBY_activated	TAT	GTA	Y	0.0127988	0.0117002	0.0146252	0.0139275	-8.10419	0.1006	0.147031	=	=			01_3_SRSF1_GM19238_GSE52834_activated	TAT	GTA	Y	0.0160511	0.0129771	0.0198473	0.0138044	16.2753	0.1088	0.172267	=	=			01_4_SRSF1_Hela_GSE26463_activated	TAT	GTA	Y	0.0123064
01_1_SRSF1_K562_ENCSR066VOO_activated	TCA	IGA,TGA	S	0.0158377	0.0162963	0.0158519	0.0122732	29.0436	0	0	+	+			01_2_SRSF1_HepG2_ENCSR094KBY_activated	TCA	IGA,TGA	S	0.0142833	0.014808	0.0146252	0.0122899	16.2198	0.0095	0.0200556	+	+			01_3_SRSF1_GM19238_GSE52834_activated	TCA	IGA,TGA	S	0.0182752	0.0145038	0.0175573	0.0123687	47.7536	0.0014	0.0133	+	+			01_4_SRSF1_Hela_GSE26463_activated	TCA	IGA,TGA	S	0.0162888
01_1_SRSF1_K562_ENCSR066VOO_activated	TCC	IGA,GGA	S	0.0160701	0.0161481	0.0148148	0.0152454	5.40924	0.1572	0.186675	=	=			01_2_SRSF1_HepG2_ENCSR094KBY_activated	TCC	IGA,GGA	S	0.0142693	0.0153565	0.0120658	0.0152235	-6.26828	0.1428	0.169575	=	=			01_3_SRSF1_GM19238_GSE52834_activated	TCC	IGA,GGA	S	0.0137897	0.0152672	0.00992366	0.0153709	-10.2867	0.1946	0.246493	=	=			01_4_SRSF1_Hela_GSE26463_activated	TCC	IGA,GGA	S	0.015483
01_1_SRSF1_K562_ENCSR066VOO_activated	TCG	CGA,TGA	S	0.00347312	0.00340741	0.00355556	0.00336277	3.28162	0.3815	0.402694	=	=			01_2_SRSF1_HepG2_ENCSR094KBY_activated	TCG	CGA,TGA	S	0.003877	0.00365631	0.00457038	0.00337179	14.9835	0.1101	0.149421	=	=			01_3_SRSF1_GM19238_GSE52834_activated	TCG	CGA,TGA	S	0.00227479	0.00305344	0.00152672	0.00341662	-33.4198	0.0732	0.126436	=	=			01_4_SRSF1_Hela_GSE26463_activated	TCG	CGA,TGA	S	0.00374335
01_1_SRSF1_K562_ENCSR066VOO_activated	TCT	IGA,GGA	S	0.0163277	0.0182222	0.0148148	0.0148823	9.71198	0.0437	0.0691917	*	=			01_2_SRSF1_HepG2_ENCSR094KBY_activated	TCT	IGA,GGA	S	0.0166532	0.0170018	0.0144424	0.0149219	11.6022	0.0285	0.05415	*	=			01_3_SRSF1_GM19238_GSE52834_activated	TCT	IGA,GGA	S	0.0193631	0.021374	0.0198473	0.0149956	29.1253	0.013	0.0411667	+	+			01_4_SRSF1_Hela_GSE26463_activated	TCT	IGA,GGA	S	0.0145503
01_1_SRSF1_K562_ENCSR066VOO_activated	TGA	TCA	*	0.00076464	0	0.00148148	0.00010104	656.769	0	0	+	+			01_2_SRSF1_HepG2_ENCSR094KBY_activated	TGA	TCA	*	0.00100335	0	0.00164534	0.000111582	799.212	0	0	+	+			01_3_SRSF1_GM19238_GSE52834_activated	TGA	TCA	*	0.00101396	0	0.00152672	0.000122875	725.198	0.0021	0.0133	+	+			01_4_SRSF1_Hela_GSE26463_activated	TGA	TCA	*	0.000742027
01_1_SRSF1_K562_ENCSR066VOO_activated	TGC	GCA	C	0.0101796	0.0108148	0.00918519	0.0115555	-11.9072	0.0376	0.0649455	*	=			01_2_SRSF1_HepG2_ENCSR094KBY_activated	TGC	GCA	C	0.00929014	0.00914077	0.00749543	0.0115114	-19.2962	0.0045	0.0106875	-	-			01_3_SRSF1_GM19238_GSE52834_activated	TGC	GCA	C	0.00882746	0.0114504	0.00839695	0.0114796	-23.1028	0.0643	0.126436	=	=			01_4_SRSF1_Hela_GSE26463_activated	TGC	GCA	C	0.0108105
01_1_SRSF1_K562_ENCSR066VOO_activated	TGG	CCA	W	0.0137012	0.0158519	0.0121481	0.012604	8.70573	0.0665	0.09025	=	=			01_2_SRSF1_HepG2_ENCSR094KBY_activated	TGG	CCA	W	0.0140006	0.0160878	0.0140768	0.0125572	11.4946	0.0383	0.0661545	*	=			01_3_SRSF1_GM19238_GSE52834_activated	TGG	CCA	W	0.0123713	0.0167939	0.0122137	0.0125288	-1.25669	0.4757	0.4948	=	=			01_4_SRSF1_Hela_GSE26463_activated	TGG	CCA	W	0.0107332
01_1_SRSF1_K562_ENCSR066VOO_activated	TGT	GCA	C	0.0103351	0.0111111	0.00859259	0.0110469	-6.44334	0.1737	0.194135	=	=			01_2_SRSF1_HepG2_ENCSR094KBY_activated	TGT	GCA	C	0.00846185	0.0106033	0.00621572	0.0109987	-23.065	0.0005	0.00285	-	-			01_3_SRSF1_GM19238_GSE52834_activated	TGT	GCA	C	0.0101163	0.00839695	0.010687	0.010885	-7.06194	0.3383	0.3781	=	=			01_4_SRSF1_Hela_GSE26463_activated	TGT	GCA	C	0.00731424
01_1_SRSF1_K562_ENCSR066VOO_activated	TTA	TAA	L	0.00946593	0.0108148	0.00962963	0.00952268	-0.596003	0.4742	0.4742	=	=			01_2_SRSF1_HepG2_ENCSR094KBY_activated	TTA	TAA	L	0.00914233	0.00968921	0.0104205	0.00951822	-3.94924	0.3136	0.350494	=	=			01_3_SRSF1_GM19238_GSE52834_activated	TTA	TAA	L	0.00940774	0.0137405	0.00839695	0.00943173	-0.254403	0.4948	0.4948	=	=			01_4_SRSF1_Hela_GSE26463_activated	TTA	TAA	L	0.0084253
01_1_SRSF1_K562_ENCSR066VOO_activated	TTC	GAA	F	0.0172639	0.0161481	0.0165926	0.0196383	-12.0906	0.0059	0.0140125	-	-			01_2_SRSF1_HepG2_ENCSR094KBY_activated	TTC	GAA	F	0.0166187	0.0166362	0.0175503	0.0195918	-15.1751	0.0024	0.0076	-	-			01_3_SRSF1_GM19238_GSE52834_activated	TTC	GAA	F	0.0170634	0.0152672	0.0129771	0.0195274	-12.6182	0.1252	0.182985	=	=			01_4_SRSF1_Hela_GSE26463_activated	TTC	GAA	F	0.0142695
01_1_SRSF1_K562_ENCSR066VOO_activated	TTG	TAA,CAA	L	0.0136014	0.0145185	0.012	0.0143763	-5.39015	0.1569	0.186675	=	=			01_2_SRSF1_HepG2_ENCSR094KBY_activated	TTG	TAA,CAA	L	0.0134331	0.0135283	0.0124314	0.01437	-6.51975	0.1381	0.169575	=	=			01_3_SRSF1_GM19238_GSE52834_activated	TTG	TAA,CAA	L	0.0150156	0.0183206	0.0145038	0.0143042	4.97306	0.3351	0.3781	=	=			01_4_SRSF1_Hela_GSE26463_activated	TTG	TAA,CAA	L	0.010804
01_1_SRSF1_K562_ENCSR066VOO_activated	TTT	GAA	F	0.0179801	0.0188148	0.0183704	0.0197679	-9.04371	0.0244	0.04636	-	-			01_2_SRSF1_HepG2_ENCSR094KBY_activated	TTT	GAA	F	0.0195425	0.0232176	0.01883	0.0197422	-1.01151	0.432	0.432	=	=			01_3_SRSF1_GM19238_GSE52834_activated	TTT	GAA	F	0.0159092	0.0175573	0.0183206	0.01957	-18.706	0.0399	0.1083	*	=			01_4_SRSF1_Hela_GSE26463_activated	TTT	GAA	F	0.0185241
Project	codon	tRNA	amino_acid	frequencies_of_the_interest_set	frequencies_interest_set_5p	frequencies_interest_set_3p	average_frequencies_of_the_10000_sets		p_values_like	FDR	regulation_(p<=0,05)	regulation(fdr<=0,05)			Project	codon	tRNA	amino_acid	frequencies_of_the_interest_set	frequencies_interest_set_5p	frequencies_interest_set_3p	average_frequencies_of_the_10000_sets		p_values_like	FDR	regulation_(p<=0,05)	regulation(fdr<=0,05)			Project	codon	tRNA	amino_acid	frequencies_of_the_interest_set	frequencies_interest_set_5p	frequencies_interest_set_3p	average_frequencies_of_the_10000_sets		p_values_like	FDR	regulation_(p<=0,05)	regulation(fdr<=0,05)			Project	codon	tRNA	amino_acid	frequencies_of_the_interest_set
01_1_SRSF1_K562_ENCSR066VOO_repressed	AAA	TTT	K	0.0372771	0.0352713	0.0437984	0.0307026	21.4136	0.0015	0.00342857	+	+			01_2_SRSF1_HepG2_ENCSR094KBY_repressed	AAA	TTT	K	0.0312449	0.030303	0.0354978	0.0305234	2.3635	0.3729	0.3732	=	=			01_3_SRSF1_GM19238_GSE52834_repressed	AAA	TTT	K	0.0278428	0.0285714	0.0363636	0.0292052	-4.66517	0.3717	0.4926	=	=			01_4_SRSF1_Hela_GSE26463_repressed	AAA	TTT	K	0.0247828
01_1_SRSF1_K562_ENCSR066VOO_repressed	AAC	GTT	N	0.0181333	0.0170543	0.0182171	0.0191167	-5.14406	0.2592	0.296229	=	=			01_2_SRSF1_HepG2_ENCSR094KBY_repressed	AAC	GTT	N	0.0137285	0.0125541	0.0138528	0.0192207	-28.5746	0.0001	0.0004	-	-			01_3_SRSF1_GM19238_GSE52834_repressed	AAC	GTT	N	0.0169055	0.0207792	0.0155844	0.0194182	-12.9398	0.1844	0.330133	=	=			01_4_SRSF1_Hela_GSE26463_repressed	AAC	GTT	N	0.0171621
01_1_SRSF1_K562_ENCSR066VOO_repressed	AAG	CTT,TTT	K	0.0288042	0.0248062	0.0375969	0.0355644	-19.0083	0.0006	0.00192	-	-			01_2_SRSF1_HepG2_ENCSR094KBY_repressed	AAG	CTT,TTT	K	0.0256644	0.021645	0.0329004	0.0354178	-27.5383	0	0	-	-			01_3_SRSF1_GM19238_GSE52834_repressed	AAG	CTT,TTT	K	0.0277163	0.0220779	0.0350649	0.0345651	-19.8142	0.0364	0.11648	*	=			01_4_SRSF1_Hela_GSE26463_repressed	AAG	CTT,TTT	K	0.0180846
01_1_SRSF1_K562_ENCSR066VOO_repressed	AAT	GTT	N	0.022105	0.020155	0.0248062	0.0204713	7.98058	0.166	0.221333	=	=			01_2_SRSF1_HepG2_ENCSR094KBY_repressed	AAT	GTT	N	0.0217236	0.0238095	0.0225108	0.0204158	6.4059	0.2246	0.276431	=	=			01_3_SRSF1_GM19238_GSE52834_repressed	AAT	GTT	N	0.0203821	0.0194805	0.0246753	0.0199728	2.04953	0.4352	0.4926	=	=			01_4_SRSF1_Hela_GSE26463_repressed	AAT	GTT	N	0.0151413
01_1_SRSF1_K562_ENCSR066VOO_repressed	ACA	IGT,TGT	T	0.0199114	0.0186047	0.0224806	0.0166839	19.3451	0.0153	0.0306	+	+			01_2_SRSF1_HepG2_ENCSR094KBY_repressed	ACA	IGT,TGT	T	0.0186618	0.0142857	0.0212121	0.0166522	12.0684	0.0998	0.15968	=	=			01_3_SRSF1_GM19238_GSE52834_repressed	ACA	IGT,TGT	T	0.0151517	0.0116883	0.0181818	0.0164318	-7.79024	0.3171	0.461236	=	=			01_4_SRSF1_Hela_GSE26463_repressed	ACA	IGT,TGT	T	0.0205386
01_1_SRSF1_K562_ENCSR066VOO_repressed	ACC	IGT,GGT	T	0.0142585	0.0104651	0.0162791	0.0163869	-12.988	0.0638	0.10208	=	=			01_2_SRSF1_HepG2_ENCSR094KBY_repressed	ACC	IGT,GGT	T	0.0169263	0.0155844	0.0155844	0.0164851	2.67606	0.3732	0.3732	=	=			01_3_SRSF1_GM19238_GSE52834_repressed	ACC	IGT,GGT	T	0.0103274	0.00649351	0.0116883	0.0169605	-39.1088	0.0026	0.0138667	-	-			01_4_SRSF1_Hela_GSE26463_repressed	ACC	IGT,GGT	T	0.01526
01_1_SRSF1_K562_ENCSR066VOO_repressed	ACG	CGT,TGT	T	0.00464016	0.00503876	0.00542636	0.0053177	-12.7413	0.1997	0.245785	=	=			01_2_SRSF1_HepG2_ENCSR094KBY_repressed	ACG	CGT,TGT	T	0.00563946	0.004329	0.00779221	0.00534733	5.46305	0.3549	0.3732	=	=			01_3_SRSF1_GM19238_GSE52834_repressed	ACG	CGT,TGT	T	0.00689846	0.00909091	0.0038961	0.00547205	26.0673	0.1576	0.330133	=	=			01_4_SRSF1_Hela_GSE26463_repressed	ACG	CGT,TGT	T	0.00543443
01_1_SRSF1_K562_ENCSR066VOO_repressed	ACT	IGT,GGT	T	0.022422	0.0255814	0.0189922	0.0133558	67.8824	0	0	+	+			01_2_SRSF1_HepG2_ENCSR094KBY_repressed	ACT	IGT,GGT	T	0.0209449	0.0220779	0.0212121	0.0133515	56.8736	0	0	+	+			01_3_SRSF1_GM19238_GSE52834_repressed	ACT	IGT,GGT	T	0.0168619	0.00909091	0.0220779	0.0133812	26.012	0.066	0.176	=	=			01_4_SRSF1_Hela_GSE26463_repressed	ACT	IGT,GGT	T	0.0202771
01_1_SRSF1_K562_ENCSR066VOO_repressed	AGA	TCT	R	0.0200936	0.0193798	0.0232558	0.0134202	49.7268	0	0	+	+			01_2_SRSF1_HepG2_ENCSR094KBY_repressed	AGA	TCT	R	0.0184814	0.0190476	0.0186147	0.0133529	38.4077	0.0009	0.0024	+	+			01_3_SRSF1_GM19238_GSE52834_repressed	AGA	TCT	R	0.02303	0.0194805	0.0233766	0.0127786	80.2234	0.0001	0.0008	+	+			01_4_SRSF1_Hela_GSE26463_repressed	AGA	TCT	R	0.0170792
01_1_SRSF1_K562_ENCSR066VOO_repressed	AGC	GCT	S	0.0151218	0.0124031	0.0143411	0.0155442	-2.71748	0.3922	0.418347	=	=			01_2_SRSF1_HepG2_ENCSR094KBY_repressed	AGC	GCT	S	0.0198015	0.0199134	0.0160173	0.0156033	26.9057	0.0038	0.00868571	+	+			01_3_SRSF1_GM19238_GSE52834_repressed	AGC	GCT	S	0.0158213	0.0181818	0.0103896	0.0162206	-2.46183	0.4498	0.4926	=	=			01_4_SRSF1_Hela_GSE26463_repressed	AGC	GCT	S	0.0256377
01_1_SRSF1_K562_ENCSR066VOO_repressed	AGG	CCT,TCT	R	0.00829106	0.00968992	0.00620155	0.0100366	-17.3919	0.0575	0.10208	=	=			01_2_SRSF1_HepG2_ENCSR094KBY_repressed	AGG	CCT,TCT	R	0.00819356	0.00735931	0.00909091	0.010039	-18.383	0.0542	0.1084	=	=			01_3_SRSF1_GM19238_GSE52834_repressed	AGG	CCT,TCT	R	0.00975996	0.0168831	0.00779221	0.00999355	-2.33749	0.471	0.4926	=	=			01_4_SRSF1_Hela_GSE26463_repressed	AGG	CCT,TCT	R	0.00776338
01_1_SRSF1_K562_ENCSR066VOO_repressed	AGT	GCT	S	0.0185101	0.0178295	0.0197674	0.0119027	55.5122	0	0	+	+			01_2_SRSF1_HepG2_ENCSR094KBY_repressed	AGT	GCT	S	0.0194042	0.0233766	0.0194805	0.0118975	63.094	0	0	+	+			01_3_SRSF1_GM19238_GSE52834_repressed	AGT	GCT	S	0.0215211	0.0324675	0.0181818	0.0118973	80.8908	0	0	+	+			01_4_SRSF1_Hela_GSE26463_repressed	AGT	GCT	S	0.021466
01_1_SRSF1_K562_ENCSR066VOO_repressed	ATA	IAT,TAT	I	0.0138071	0.0143411	0.0127907	0.00953413	44.8175	0.0002	0.0008	+	+			01_2_SRSF1_HepG2_ENCSR094KBY_repressed	ATA	IAT,TAT	I	0.0106226	0.00952381	0.0116883	0.00951555	11.6347	0.1755	0.234	=	=			01_3_SRSF1_GM19238_GSE52834_repressed	ATA	IAT,TAT	I	0.00906178	0.00519481	0.0116883	0.00915391	-1.00641	0.4926	0.4926	=	=			01_4_SRSF1_Hela_GSE26463_repressed	ATA	IAT,TAT	I	0.0128493
01_1_SRSF1_K562_ENCSR066VOO_repressed	ATC	IAT,GAT	I	0.016261	0.0170543	0.0182171	0.0212892	-23.6184	0.0011	0.00293333	-	-			01_2_SRSF1_HepG2_ENCSR094KBY_repressed	ATC	IAT,GAT	I	0.0152946	0.0147186	0.0160173	0.0213413	-28.3335	0.0003	0.00096	-	-			01_3_SRSF1_GM19238_GSE52834_repressed	ATC	IAT,GAT	I	0.0141479	0.0103896	0.012987	0.0216478	-34.6451	0.0039	0.0156	-	-			01_4_SRSF1_Hela_GSE26463_repressed	ATC	IAT,GAT	I	0.0167024
01_1_SRSF1_K562_ENCSR066VOO_repressed	ATG	CAT	M	0.0231338	0.027907	0.0178295	0.0231038	0.129754	0.4878	0.4878	=	=			01_2_SRSF1_HepG2_ENCSR094KBY_repressed	ATG	CAT	M	0.0212286	0.025974	0.0186147	0.0230549	-7.92141	0.156	0.226909	=	=			01_3_SRSF1_GM19238_GSE52834_repressed	ATG	CAT	M	0.020981	0.0246753	0.0168831	0.0226899	-7.53174	0.295	0.461236	=	=			01_4_SRSF1_Hela_GSE26463_repressed	ATG	CAT	M	0.0196571
01_1_SRSF1_K562_ENCSR066VOO_repressed	ATT	IAT,GAT	I	0.0218879	0.022093	0.0205426	0.0198707	10.1513	0.1092	0.158836	=	=			01_2_SRSF1_HepG2_ENCSR094KBY_repressed	ATT	IAT,GAT	I	0.0173716	0.0212121	0.0190476	0.0198442	-12.4597	0.0685	0.121778	=	=			01_3_SRSF1_GM19238_GSE52834_repressed	ATT	IAT,GAT	I	0.0169826	0.0233766	0.00909091	0.0195559	-13.1588	0.1857	0.330133	=	=			01_4_SRSF1_Hela_GSE26463_repressed	ATT	IAT,GAT	I	0.0145919
01_1_SRSF1_K562_ENCSR066VOO_repressed	CAA	TTG	Q	0.0205372	0.0182171	0.0244186	0.01446	42.0278	0.0001	0.0003	+	+			01_2_SRSF1_HepG2_ENCSR094KBY_repressed	CAA	TTG	Q	0.0148958	0.0103896	0.0186147	0.0143846	3.55323	0.3574	0.42888	=	=			01_3_SRSF1_GM19238_GSE52834_repressed	CAA	TTG	Q	0.0167827	0.0116883	0.0233766	0.0140089	19.7997	0.1327	0.341229	=	=			01_4_SRSF1_Hela_GSE26463_repressed	CAA	TTG	Q	0.0181051
01_1_SRSF1_K562_ENCSR066VOO_repressed	CAC	GTG	H	0.0159333	0.0162791	0.0182171	0.0129605	22.9372	0.0124	0.02232	+	+			01_2_SRSF1_HepG2_ENCSR094KBY_repressed	CAC	GTG	H	0.0133806	0.0155844	0.0134199	0.013021	2.76158	0.3867	0.435038	=	=			01_3_SRSF1_GM19238_GSE52834_repressed	CAC	GTG	H	0.0126315	0.00779221	0.0168831	0.0135137	-6.52761	0.3607	0.420075	=	=			01_4_SRSF1_Hela_GSE26463_repressed	CAC	GTG	H	0.0159067
01_1_SRSF1_K562_ENCSR066VOO_repressed	CAG	CTG,TTG	Q	0.0363361	0.0302326	0.0476744	0.0335799	8.2077	0.1032	0.12384	=	=			01_2_SRSF1_HepG2_ENCSR094KBY_repressed	CAG	CTG,TTG	Q	0.0340109	0.0294372	0.0419913	0.0336719	1.00683	0.435	0.4514	=	=			01_3_SRSF1_GM19238_GSE52834_repressed	CAG	CTG,TTG	Q	0.0335424	0.0220779	0.038961	0.034142	-1.75604	0.4479	0.4672	=	=			01_4_SRSF1_Hela_GSE26463_repressed	CAG	CTG,TTG	Q	0.0438854
01_1_SRSF1_K562_ENCSR066VOO_repressed	CAT	GTG	H	0.0142173	0.0108527	0.0174419	0.0117689	20.8039	0.023	0.0376364	+	+			01_2_SRSF1_HepG2_ENCSR094KBY_repressed	CAT	GTG	H	0.0143486	0.00952381	0.0138528	0.0117934	21.6669	0.0255	0.051	*	=			01_3_SRSF1_GM19238_GSE52834_repressed	CAT	GTG	H	0.0129	0.00909091	0.0194805	0.0117035	10.2232	0.2837	0.371571	=	=			01_4_SRSF1_Hela_GSE26463_repressed	CAT	GTG	H	0.0151975
01_1_SRSF1_K562_ENCSR066VOO_repressed	CCA	IGG,TGG	P	0.0262667	0.0244186	0.0224806	0.0174707	50.3474	0	0	+	+			01_2_SRSF1_HepG2_ENCSR094KBY_repressed	CCA	IGG,TGG	P	0.0228693	0.0229437	0.0233766	0.0173655	31.6937	0.001	0.0036	+	+			01_3_SRSF1_GM19238_GSE52834_repressed	CCA	IGG,TGG	P	0.0263457	0.0298701	0.0233766	0.0168587	56.2742	0.0022	0.0132	+	+			01_4_SRSF1_Hela_GSE26463_repressed	CCA	IGG,TGG	P	0.0243775
01_1_SRSF1_K562_ENCSR066VOO_repressed	CCC	IGG,GGG	P	0.0109453	0.00930233	0.0135659	0.0149099	-26.59	0.0013	0.00334286	-	-			01_2_SRSF1_HepG2_ENCSR094KBY_repressed	CCC	IGG,GGG	P	0.0142657	0.0186147	0.0121212	0.0149551	-4.6096	0.3317	0.426471	=	=			01_3_SRSF1_GM19238_GSE52834_repressed	CCC	IGG,GGG	P	0.0169557	0.0233766	0.00909091	0.0154176	9.97671	0.2693	0.371571	=	=			01_4_SRSF1_Hela_GSE26463_repressed	CCC	IGG,GGG	P	0.0185355
01_1_SRSF1_K562_ENCSR066VOO_repressed	CCG	CGG,TGG	P	0.00380506	0.00271318	0.00465116	0.00450721	-15.5783	0.1842	0.195035	=	=			01_2_SRSF1_HepG2_ENCSR094KBY_repressed	CCG	CGG,TGG	P	0.00377153	0.0025974	0.0030303	0.00451095	-16.3917	0.1854	0.256708	=	=			01_3_SRSF1_GM19238_GSE52834_repressed	CCG	CGG,TGG	P	0.00363723	0.0012987	0.0025974	0.00457648	-20.5234	0.2651	0.371571	=	=			01_4_SRSF1_Hela_GSE26463_repressed	CCG	CGG,TGG	P	0.00918077
01_1_SRSF1_K562_ENCSR066VOO_repressed	CCT	IGG,GGG	P	0.0222207	0.0248062	0.0205426	0.0172758	28.6228	0.0016	0.0036	+	+			01_2_SRSF1_HepG2_ENCSR094KBY_repressed	CCT	IGG,GGG	P	0.0233597	0.0207792	0.0238095	0.0172038	35.782	0.0004	0.0018	+	+			01_3_SRSF1_GM19238_GSE52834_repressed	CCT	IGG,GGG	P	0.0279519	0.0272727	0.0272727	0.0169899	64.5209	0.0002	0.0036	+	+			01_4_SRSF1_Hela_GSE26463_repressed	CCT	IGG,GGG	P	0.0251506
01_1_SRSF1_K562_ENCSR066VOO_repressed	CGA	ICG,TCG	R	0.00541471	0.00658915	0.00620155	0.00685319	-20.99	0.0493	0.07395	*	=			01_2_SRSF1_HepG2_ENCSR094KBY_repressed	CGA	ICG,TCG	R	0.00480687	0.00649351	0.0047619	0.00685692	-29.8975	0.0133	0.0342	-	-			01_3_SRSF1_GM19238_GSE52834_repressed	CGA	ICG,TCG	R	0.00826582	0.0155844	0.00519481	0.00685196	20.6343	0.183	0.371571	=	=			01_4_SRSF1_Hela_GSE26463_repressed	CGA	ICG,TCG	R	0.00465161
01_1_SRSF1_K562_ENCSR066VOO_repressed	CGC	ICG,GCG	R	0.00501613	0.00387597	0.00503876	0.00700826	-28.4254	0.0121	0.02232	-	-			01_2_SRSF1_HepG2_ENCSR094KBY_repressed	CGC	ICG,GCG	R	0.00485599	0.00519481	0.0034632	0.00707727	-31.386	0.0108	0.0324	-	-			01_3_SRSF1_GM19238_GSE52834_repressed	CGC	ICG,GCG	R	0.00757987	0.00649351	0.00649351	0.00779241	-2.72747	0.4672	0.4672	=	=			01_4_SRSF1_Hela_GSE26463_repressed	CGC	ICG,GCG	R	0.00840948
01_1_SRSF1_K562_ENCSR066VOO_repressed	CGG	CCG,TCG	R	0.00383119	0.00232558	0.00387597	0.00950699	-59.7013	0	0	-	-			01_2_SRSF1_HepG2_ENCSR094KBY_repressed	CGG	CCG,TCG	R	0.00513024	0.00649351	0.00562771	0.00959082	-46.5088	0.0001	0.0006	-	-			01_3_SRSF1_GM19238_GSE52834_repressed	CGG	CCG,TCG	R	0.00470788	0.00649351	0.00649351	0.0100728	-53.2616	0.002	0.0132	-	-			01_4_SRSF1_Hela_GSE26463_repressed	CGG	CCG,TCG	R	0.00319804
01_1_SRSF1_K562_ENCSR066VOO_repressed	CGT	ICG,GCG	R	0.00380296	0.00465116	0.00310078	0.00437173	-13.0103	0.2086	0.2086	=	=			01_2_SRSF1_HepG2_ENCSR094KBY_repressed	CGT	ICG,GCG	R	0.00449565	0.00562771	0.0021645	0.00441456	1.83692	0.4514	0.4514	=	=			01_3_SRSF1_GM19238_GSE52834_repressed	CGT	ICG,GCG	R	0.0051786	0.00779221	0.0012987	0.00453529	14.1846	0.289	0.371571	=	=			01_4_SRSF1_Hela_GSE26463_repressed	CGT	ICG,GCG	R	0.00548368
01_1_SRSF1_K562_ENCSR066VOO_repressed	CTA	IAG,TAG	L	0.0133642	0.0143411	0.0127907	0.00806469	65.7129	0	0	+	+			01_2_SRSF1_HepG2_ENCSR094KBY_repressed	CTA	IAG,TAG	L	0.010414	0.00995671	0.00909091	0.00806484	29.129	0.0182	0.04095	+	+			01_3_SRSF1_GM19238_GSE52834_repressed	CTA	IAG,TAG	L	0.0120253	0.0142857	0.00779221	0.00795514	51.1639	0.014	0.0504	+	=			01_4_SRSF1_Hela_GSE26463_repressed	CTA	IAG,TAG	L	0.00913848
01_1_SRSF1_K562_ENCSR066VOO_repressed	CTC	IAG,GAG	L	0.0155561	0.0135659	0.0155039	0.0174902	-11.0578	0.0938	0.1206	=	=			01_2_SRSF1_HepG2_ENCSR094KBY_repressed	CTC	IAG,GAG	L	0.0157238	0.0142857	0.0168831	0.0175795	-10.5562	0.1213	0.18195	=	=			01_3_SRSF1_GM19238_GSE52834_repressed	CTC	IAG,GAG	L	0.0160881	0.00649351	0.0116883	0.0180071	-10.657	0.2425	0.371571	=	=			01_4_SRSF1_Hela_GSE26463_repressed	CTC	IAG,GAG	L	0.0107717
01_1_SRSF1_K562_ENCSR066VOO_repressed	CTG	CAG,TAG	L	0.0239076	0.024031	0.0205426	0.0360829	-33.7427	0	0	-	-			01_2_SRSF1_HepG2_ENCSR094KBY_repressed	CTG	CAG,TAG	L	0.0258288	0.0285714	0.0233766	0.0362582	-28.7642	0	0	-	-			01_3_SRSF1_GM19238_GSE52834_repressed	CTG	CAG,TAG	L	0.0279925	0.0233766	0.0285714	0.0373221	-24.9975	0.013	0.0504	-	=			01_4_SRSF1_Hela_GSE26463_repressed	CTG	CAG,TAG	L	0.029435
01_1_SRSF1_K562_ENCSR066VOO_repressed	CTT	IAG,GAG	L	0.0174227	0.0189922	0.0193798	0.0153958	13.1652	0.0787	0.108969	=	=			01_2_SRSF1_HepG2_ENCSR094KBY_repressed	CTT	IAG,GAG	L	0.0179958	0.0181818	0.0177489	0.0153757	17.0402	0.0423	0.0692182	*	=			01_3_SRSF1_GM19238_GSE52834_repressed	CTT	IAG,GAG	L	0.0168688	0.0194805	0.0181818	0.0151573	11.2913	0.2426	0.371571	=	=			01_4_SRSF1_Hela_GSE26463_repressed	CTT	IAG,GAG	L	0.0130696
01_1_SRSF1_K562_ENCSR066VOO_repressed	GAA	TTC	E	0.0337563	0.0395349	0.029845	0.0366172	-7.81294	0.1229	0.138263	=	=			01_2_SRSF1_HepG2_ENCSR094KBY_repressed	GAA	TTC	E	0.0319965	0.0337662	0.030303	0.0364495	-12.2168	0.0416	0.0692182	*	=			01_3_SRSF1_GM19238_GSE52834_repressed	GAA	TTC	E	0.0336674	0.0402597	0.0246753	0.0352664	-4.53428	0.3734	0.420075	=	=			01_4_SRSF1_Hela_GSE26463_repressed	GAA	TTC	E	0.0244285
01_1_SRSF1_K562_ENCSR066VOO_repressed	GAC	GTC	D	0.0154205	0.0166667	0.0124031	0.0246718	-37.4974	0	0	-	-			01_2_SRSF1_HepG2_ENCSR094KBY_repressed	GAC	GTC	D	0.0170737	0.0181818	0.0190476	0.024689	-30.8448	0	0	-	-			01_3_SRSF1_GM19238_GSE52834_repressed	GAC	GTC	D	0.0204657	0.0233766	0.0220779	0.0249795	-18.0702	0.0702	0.2106	=	=			01_4_SRSF1_Hela_GSE26463_repressed	GAC	GTC	D	0.0142947
01_1_SRSF1_K562_ENCSR066VOO_repressed	GAG	TTC,CTC	E	0.0310601	0.0294574	0.0333333	0.0382045	-18.7004	0.0007	0.00175	-	-			01_2_SRSF1_HepG2_ENCSR094KBY_repressed	GAG	TTC,CTC	E	0.0291344	0.0281385	0.0316017	0.0381776	-23.6871	0	0	-	-			01_3_SRSF1_GM19238_GSE52834_repressed	GAG	TTC,CTC	E	0.0311944	0.0272727	0.038961	0.038639	-19.267	0.0402	0.1005	*	=			01_4_SRSF1_Hela_GSE26463_repressed	GAG	TTC,CTC	E	0.0294577
01_1_SRSF1_K562_ENCSR066VOO_repressed	GAT	GTC	D	0.023447	0.025969	0.0182171	0.0268515	-12.6789	0.0386	0.0459231	*	*			01_2_SRSF1_HepG2_ENCSR094KBY_repressed	GAT	GTC	D	0.0212109	0.0255411	0.0194805	0.026737	-20.6685	0.0019	0.00475	-	-			01_3_SRSF1_GM19238_GSE52834_repressed	GAT	GTC	D	0.0216514	0.0363636	0.0116883	0.0261599	-17.2343	0.0916	0.17175	=	=			01_4_SRSF1_Hela_GSE26463_repressed	GAT	GTC	D	0.0259218
01_1_SRSF1_K562_ENCSR066VOO_repressed	GCA	IGC,TGC	A	0.0165691	0.0182171	0.0147287	0.0174364	-4.97399	0.2824	0.2824	=	=			01_2_SRSF1_HepG2_ENCSR094KBY_repressed	GCA	IGC,TGC	A	0.0186907	0.0181818	0.0225108	0.0173548	7.69725	0.1961	0.234808	=	=			01_3_SRSF1_GM19238_GSE52834_repressed	GCA	IGC,TGC	A	0.0145543	0.00909091	0.0194805	0.0172032	-15.3979	0.1548	0.258	=	=			01_4_SRSF1_Hela_GSE26463_repressed	GCA	IGC,TGC	A	0.0179227
01_1_SRSF1_K562_ENCSR066VOO_repressed	GCC	IGC,GGC	A	0.0189702	0.0186047	0.0174419	0.0224836	-15.6264	0.0164	0.0246	-	-			01_2_SRSF1_HepG2_ENCSR094KBY_repressed	GCC	IGC,GGC	A	0.0202024	0.0186147	0.0177489	0.0226063	-10.6336	0.0948	0.153818	=	=			01_3_SRSF1_GM19238_GSE52834_repressed	GCC	IGC,GGC	A	0.0239252	0.0272727	0.0220779	0.0235592	1.55353	0.4405	0.4524	=	=			01_4_SRSF1_Hela_GSE26463_repressed	GCC	IGC,GGC	A	0.0219899
01_1_SRSF1_K562_ENCSR066VOO_repressed	GCG	CGC,TGC	A	0.00372787	0.00465116	0.00232558	0.00443455	-15.9359	0.1856	0.198857	=	=			01_2_SRSF1_HepG2_ENCSR094KBY_repressed	GCG	CGC,TGC	A	0.00476926	0.00562771	0.0030303	0.00447552	6.56325	0.349	0.3713	=	=			01_3_SRSF1_GM19238_GSE52834_repressed	GCG	CGC,TGC	A	0.00438485	0.00779221	0.0038961	0.00464223	-5.54432	0.4524	0.4524	=	=			01_4_SRSF1_Hela_GSE26463_repressed	GCG	CGC,TGC	A	0.00423993
01_1_SRSF1_K562_ENCSR066VOO_repressed	GCT	IGC,GGC	A	0.0162228	0.0166667	0.0155039	0.0189379	-14.3366	0.0342	0.0459231	*	*			01_2_SRSF1_HepG2_ENCSR094KBY_repressed	GCT	IGC,GGC	A	0.0209215	0.0181818	0.0186147	0.0189257	10.5453	0.1095	0.153818	=	=			01_3_SRSF1_GM19238_GSE52834_repressed	GCT	IGC,GGC	A	0.0234942	0.0233766	0.0220779	0.0188483	24.6489	0.0523	0.112071	=	=			01_4_SRSF1_Hela_GSE26463_repressed	GCT	IGC,GGC	A	0.0144607
01_1_SRSF1_K562_ENCSR066VOO_repressed	GGA	ICC,TCC	G	0.0112224	0.0120155	0.00968992	0.0197086	-43.0585	0	0	-	-			01_2_SRSF1_HepG2_ENCSR094KBY_repressed	GGA	ICC,TCC	G	0.0129412	0.0116883	0.0155844	0.0195213	-33.7074	0.0001	0.000375	-	-			01_3_SRSF1_GM19238_GSE52834_repressed	GGA	ICC,TCC	G	0.00994615	0.0103896	0.0142857	0.0184074	-45.9666	0.0011	0.00825	-	-			01_4_SRSF1_Hela_GSE26463_repressed	GGA	ICC,TCC	G	0.00556987
01_1_SRSF1_K562_ENCSR066VOO_repressed	GGC	ICC,GCC	G	0.010355	0.0112403	0.0124031	0.0175888	-41.1277	0	0	-	-			01_2_SRSF1_HepG2_ENCSR094KBY_repressed	GGC	ICC,GCC	G	0.0140263	0.0147186	0.0142857	0.0176063	-20.3339	0.0127	0.0272143	-	-			01_3_SRSF1_GM19238_GSE52834_repressed	GGC	ICC,GCC	G	0.0122483	0.0142857	0.00649351	0.018172	-32.5981	0.0137	0.051375	-	=			01_4_SRSF1_Hela_GSE26463_repressed	GGC	ICC,GCC	G	0.0169212
01_1_SRSF1_K562_ENCSR066VOO_repressed	GGG	CCC,TCC	G	0.0102831	0.0108527	0.0112403	0.0131303	-21.6844	0.0122	0.0203333	-	-			01_2_SRSF1_HepG2_ENCSR094KBY_repressed	GGG	CCC,TCC	G	0.014818	0.0168831	0.0125541	0.0131249	12.9	0.1128	0.153818	=	=			01_3_SRSF1_GM19238_GSE52834_repressed	GGG	CCC,TCC	G	0.0140348	0.0116883	0.0116883	0.0133311	5.27892	0.3671	0.4524	=	=			01_4_SRSF1_Hela_GSE26463_repressed	GGG	CCC,TCC	G	0.0134045
01_1_SRSF1_K562_ENCSR066VOO_repressed	GGT	ICC,GCC	G	0.013176	0.0174419	0.0104651	0.0107822	22.2016	0.0398	0.0459231	*	*			01_2_SRSF1_HepG2_ENCSR094KBY_repressed	GGT	ICC,GCC	G	0.0110834	0.0138528	0.00779221	0.0106843	3.73518	0.3713	0.3713	=	=			01_3_SRSF1_GM19238_GSE52834_repressed	GGT	ICC,GCC	G	0.0105504	0.012987	0.0103896	0.0103092	2.33975	0.4274	0.4524	=	=			01_4_SRSF1_Hela_GSE26463_repressed	GGT	ICC,GCC	G	0.0137331
01_1_SRSF1_K562_ENCSR066VOO_repressed	GTA	IAC,TAC	V	0.012749	0.0124031	0.0108527	0.00837268	52.269	0.0001	0.0003	+	+			01_2_SRSF1_HepG2_ENCSR094KBY_repressed	GTA	IAC,TAC	V	0.0125636	0.0147186	0.0116883	0.00836243	50.2388	0	0	+	+			01_3_SRSF1_GM19238_GSE52834_repressed	GTA	IAC,TAC	V	0.0144803	0.0194805	0.00649351	0.00821916	76.177	0.0011	0.00825	+	+			01_4_SRSF1_Hela_GSE26463_repressed	GTA	IAC,TAC	V	0.0144001
01_1_SRSF1_K562_ENCSR066VOO_repressed	GTC	IAC,GAC	V	0.0104574	0.0116279	0.00852713	0.0136315	-23.2852	0.0053	0.0099375	-	-			01_2_SRSF1_HepG2_ENCSR094KBY_repressed	GTC	IAC,GAC	V	0.0154521	0.0142857	0.0134199	0.0136809	12.9467	0.0953	0.153818	=	=			01_3_SRSF1_GM19238_GSE52834_repressed	GTC	IAC,GAC	V	0.0130812	0.012987	0.012987	0.0139201	-6.02649	0.3701	0.4524	=	=			01_4_SRSF1_Hela_GSE26463_repressed	GTC	IAC,GAC	V	0.0125217
01_1_SRSF1_K562_ENCSR066VOO_repressed	GTG	CAC,TAC	V	0.0193433	0.0197674	0.0139535	0.0264801	-26.9515	0.0001	0.0003	-	-			01_2_SRSF1_HepG2_ENCSR094KBY_repressed	GTG	CAC,TAC	V	0.0207036	0.021645	0.0186147	0.0266149	-22.2104	0.001	0.003	-	-			01_3_SRSF1_GM19238_GSE52834_repressed	GTG	CAC,TAC	V	0.0335204	0.0285714	0.0298701	0.0272948	22.8086	0.0366	0.1005	*	=			01_4_SRSF1_Hela_GSE26463_repressed	GTG	CAC,TAC	V	0.0297714
01_1_SRSF1_K562_ENCSR066VOO_repressed	GTT	IAC,GAC	V	0.0173742	0.0224806	0.0135659	0.0133014	30.6187	0.0016	0.00342857	+	+			01_2_SRSF1_HepG2_ENCSR094KBY_repressed	GTT	IAC,GAC	V	0.0144847	0.0160173	0.0155844	0.0132846	9.03364	0.2035	0.234808	=	=			01_3_SRSF1_GM19238_GSE52834_repressed	GTT	IAC,GAC	V	0.0136275	0.0142857	0.0142857	0.0130266	4.61265	0.3799	0.4524	=	=			01_4_SRSF1_Hela_GSE26463_repressed	GTT	IAC,GAC	V	0.014185
01_1_SRSF1_K562_ENCSR066VOO_repressed	TAA	TTA	*	0.00275564	0	0.00193798	0.000123293	2135.04	0	0	+	+			01_2_SRSF1_HepG2_ENCSR094KBY_repressed	TAA	TTA	*	0.00117001	0	0.000865801	0.000111434	949.957	0	0	+	+			01_3_SRSF1_GM19238_GSE52834_repressed	TAA	TTA	*	0.000760456	0	0	7.75628e-05	880.44	0.0081	0.0405	+	+			01_4_SRSF1_Hela_GSE26463_repressed	TAA	TTA	*	0.00104275
01_1_SRSF1_K562_ENCSR066VOO_repressed	TAC	GTA	Y	0.0109674	0.0100775	0.0116279	0.014702	-25.402	0.0024	0.0045	-	-			01_2_SRSF1_HepG2_ENCSR094KBY_repressed	TAC	GTA	Y	0.012102	0.0112554	0.0112554	0.0147786	-18.1116	0.0279	0.0380455	*	*			01_3_SRSF1_GM19238_GSE52834_repressed	TAC	GTA	Y	0.013796	0.00779221	0.0220779	0.0150511	-8.33902	0.3166	0.39575	=	=			01_4_SRSF1_Hela_GSE26463_repressed	TAC	GTA	Y	0.0116835
01_1_SRSF1_K562_ENCSR066VOO_repressed	TAG	CTA,TTA	*	0.000671592	0	0.000387597	8.2161e-05	717.409	0.0006	0.00128571	+	+			01_2_SRSF1_HepG2_ENCSR094KBY_repressed	TAG	CTA,TTA	*	0.00228554	0	0.0025974	7.54566e-05	2928.94	0	0	+	+			01_3_SRSF1_GM19238_GSE52834_repressed	TAG	CTA,TTA	*	0.00147565	0	0.0025974	5.7948e-05	2446.5	0.0001	0.0015	+	+			01_4_SRSF1_Hela_GSE26463_repressed	TAG	CTA,TTA	*	0.000347584
01_1_SRSF1_K562_ENCSR066VOO_repressed	TAT	GTA	Y	0.014635	0.0131783	0.0170543	0.0141949	3.10069	0.3681	0.394393	=	=			01_2_SRSF1_HepG2_ENCSR094KBY_repressed	TAT	GTA	Y	0.0160361	0.0186147	0.0160173	0.0142153	12.8085	0.1016	0.127	=	=			01_3_SRSF1_GM19238_GSE52834_repressed	TAT	GTA	Y	0.0153021	0.0155844	0.0155844	0.0140554	8.87	0.2932	0.39575	=	=			01_4_SRSF1_Hela_GSE26463_repressed	TAT	GTA	Y	0.0128175
01_1_SRSF1_K562_ENCSR066VOO_repressed	TCA	IGA,TGA	S	0.0192911	0.0193798	0.020155	0.0126416	52.6003	0	0	+	+			01_2_SRSF1_HepG2_ENCSR094KBY_repressed	TCA	IGA,TGA	S	0.0170344	0.017316	0.0164502	0.0126283	34.891	0.0007	0.0021	+	+			01_3_SRSF1_GM19238_GSE52834_repressed	TCA	IGA,TGA	S	0.0115812	0.0103896	0.012987	0.0124017	-6.61604	0.3726	0.401357	=	=			01_4_SRSF1_Hela_GSE26463_repressed	TCA	IGA,TGA	S	0.0205036
01_1_SRSF1_K562_ENCSR066VOO_repressed	TCC	IGA,GGA	S	0.0178386	0.0182171	0.0155039	0.0146664	21.629	0.0118	0.0196667	+	+			01_2_SRSF1_HepG2_ENCSR094KBY_repressed	TCC	IGA,GGA	S	0.0199868	0.0199134	0.0168831	0.0146855	36.0995	0.0004	0.0015	+	+			01_3_SRSF1_GM19238_GSE52834_repressed	TCC	IGA,GGA	S	0.0177079	0.0272727	0.0155844	0.0150355	17.7741	0.1351	0.20265	=	=			01_4_SRSF1_Hela_GSE26463_repressed	TCC	IGA,GGA	S	0.0174516
01_1_SRSF1_K562_ENCSR066VOO_repressed	TCG	CGA,TGA	S	0.00362105	0.00465116	0.00232558	0.00324261	11.6708	0.2689	0.336125	=	=			01_2_SRSF1_HepG2_ENCSR094KBY_repressed	TCG	CGA,TGA	S	0.00527244	0.00562771	0.00562771	0.00324565	62.4466	0.0025	0.00625	+	+			01_3_SRSF1_GM19238_GSE52834_repressed	TCG	CGA,TGA	S	0.00177482	0.0012987	0.0012987	0.00331623	-46.4809	0.0724	0.177857	=	=			01_4_SRSF1_Hela_GSE26463_repressed	TCG	CGA,TGA	S	0.00608799
01_1_SRSF1_K562_ENCSR066VOO_repressed	TCT	IGA,GGA	S	0.024422	0.0236434	0.022093	0.0152624	60.0142	0	0	+	+			01_2_SRSF1_HepG2_ENCSR094KBY_repressed	TCT	IGA,GGA	S	0.027542	0.025974	0.0281385	0.0152095	81.0842	0	0	+	+			01_3_SRSF1_GM19238_GSE52834_repressed	TCT	IGA,GGA	S	0.0200918	0.0155844	0.0207792	0.0150038	33.9117	0.0255	0.0933	*	=			01_4_SRSF1_Hela_GSE26463_repressed	TCT	IGA,GGA	S	0.0243871
01_1_SRSF1_K562_ENCSR066VOO_repressed	TGA	TCA	*	0.00329123	0.000387597	0.00387597	0.000215092	1430.15	0	0	+	+			01_2_SRSF1_HepG2_ENCSR094KBY_repressed	TGA	TCA	*	0.00234528	0.0004329	0.0021645	0.000201235	1065.45	0	0	+	+			01_3_SRSF1_GM19238_GSE52834_repressed	TGA	TCA	*	0.00183964	0	0.0025974	0.000134814	1264.58	0.0005	0.00375	+	+			01_4_SRSF1_Hela_GSE26463_repressed	TGA	TCA	*	0.00521376
01_1_SRSF1_K562_ENCSR066VOO_repressed	TGC	GCA	C	0.0095275	0.00968992	0.00736434	0.0107794	-11.6137	0.1641	0.223773	=	=			01_2_SRSF1_HepG2_ENCSR094KBY_repressed	TGC	GCA	C	0.0100324	0.0108225	0.00822511	0.010894	-7.90844	0.2725	0.291964	=	=			01_3_SRSF1_GM19238_GSE52834_repressed	TGC	GCA	C	0.00819652	0.0025974	0.0116883	0.0113309	-27.6623	0.083	0.177857	=	=			01_4_SRSF1_Hela_GSE26463_repressed	TGC	GCA	C	0.017413
01_1_SRSF1_K562_ENCSR066VOO_repressed	TGG	CCA	W	0.00827606	0.00813953	0.00813953	0.0122748	-32.5767	0.0003	0.00075	-	-			01_2_SRSF1_HepG2_ENCSR094KBY_repressed	TGG	CCA	W	0.011146	0.00995671	0.0125541	0.0122802	-9.23605	0.1893	0.218423	=	=			01_3_SRSF1_GM19238_GSE52834_repressed	TGG	CCA	W	0.00989963	0.012987	0.012987	0.0125279	-20.9796	0.1104	0.184	=	=			01_4_SRSF1_Hela_GSE26463_repressed	TGG	CCA	W	0.0129749
01_1_SRSF1_K562_ENCSR066VOO_repressed	TGT	GCA	C	0.0113885	0.0131783	0.0131783	0.010886	4.61597	0.3303	0.381115	=	=			01_2_SRSF1_HepG2_ENCSR094KBY_repressed	TGT	GCA	C	0.0102033	0.0125541	0.00909091	0.0109291	-6.64059	0.3028	0.3028	=	=			01_3_SRSF1_GM19238_GSE52834_repressed	TGT	GCA	C	0.0101933	0.012987	0.00779221	0.0109986	-7.32232	0.3746	0.401357	=	=			01_4_SRSF1_Hela_GSE26463_repressed	TGT	GCA	C	0.0107816
01_1_SRSF1_K562_ENCSR066VOO_repressed	TTA	TAA	L	0.0149078	0.0120155	0.0158915	0.0100277	48.6659	0.0001	0.0003	+	+			01_2_SRSF1_HepG2_ENCSR094KBY_repressed	TTA	TAA	L	0.0126169	0.0134199	0.012987	0.0100125	26.0106	0.0209	0.0333	+	+			01_3_SRSF1_GM19238_GSE52834_repressed	TTA	TAA	L	0.0147171	0.0142857	0.0168831	0.00971026	51.5629	0.0127	0.0635	+	=			01_4_SRSF1_Hela_GSE26463_repressed	TTA	TAA	L	0.0100755
01_1_SRSF1_K562_ENCSR066VOO_repressed	TTC	GAA	F	0.0130795	0.0127907	0.0147287	0.019161	-31.7389	0.0001	0.0003	-	-			01_2_SRSF1_HepG2_ENCSR094KBY_repressed	TTC	GAA	F	0.0155152	0.0142857	0.0164502	0.019227	-19.3052	0.0117	0.0250714	-	-			01_3_SRSF1_GM19238_GSE52834_repressed	TTC	GAA	F	0.0159771	0.0103896	0.0220779	0.0195689	-18.3546	0.1011	0.184	=	=			01_4_SRSF1_Hela_GSE26463_repressed	TTC	GAA	F	0.0157776
01_1_SRSF1_K562_ENCSR066VOO_repressed	TTG	TAA,CAA	L	0.0177139	0.0209302	0.0158915	0.0147151	20.3793	0.0167	0.02505	+	+			01_2_SRSF1_HepG2_ENCSR094KBY_repressed	TTG	TAA,CAA	L	0.0176855	0.0164502	0.0160173	0.0146612	20.6278	0.0208	0.0333	+	+			01_3_SRSF1_GM19238_GSE52834_repressed	TTG	TAA,CAA	L	0.0190791	0.0155844	0.0194805	0.0144926	31.6472	0.0311	0.0933	*	=			01_4_SRSF1_Hela_GSE26463_repressed	TTG	TAA,CAA	L	0.0143232
01_1_SRSF1_K562_ENCSR066VOO_repressed	TTT	GAA	F	0.0202435	0.0232558	0.0193798	0.0203851	-0.694945	0.4646	0.4646	=	=			01_2_SRSF1_HepG2_ENCSR094KBY_repressed	TTT	GAA	F	0.0238687	0.0229437	0.0203463	0.0203634	17.2138	0.0222	0.0333	+	+			01_3_SRSF1_GM19238_GSE52834_repressed	TTT	GAA	F	0.0199354	0.0233766	0.0194805	0.0200093	-0.369359	0.4985	0.4985	=	=			01_4_SRSF1_Hela_GSE26463_repressed	TTT	GAA	F	0.0189713
[truncated: 229 more columns]

## Sheet: Nucleotide Positions
Project	ntp_info	frequencies_of_the_interest_set	frequencies_interest_set_5p	frequencies_interest_set_3p	average_frequencies_of_the_10000_sets	IC_95_of_the_10000_sets	p_values_like	BH_pcor	regulation_(p<=0,05)	reg(p_cor<=0,05)			Project	ntp_info	frequencies_of_the_interest_set	frequencies_interest_set_5p	frequencies_interest_set_3p	average_frequencies_of_the_10000_sets	IC_95_of_the_10000_sets	p_values_like	BH_pcor	regulation_(p<=0,05)	reg(p_cor<=0,05)			Project	ntp_info	frequencies_of_the_interest_set	frequencies_interest_set_5p	frequencies_interest_set_3p	average_frequencies_of_the_10000_sets	IC_95_of_the_10000_sets	p_values_like	BH_pcor	regulation_(p<=0,05)	reg(p_cor<=0,05)			Project	ntp_info	frequencies_of_the_interest_set	frequencies_interest_set_5p	frequencies_interest_set_3p	average_frequencies_of_the_10000_sets	IC_95_of_the_10000_sets	p_values_like	BH_pcor	regulation_(p<=0,05)	reg(p_cor<=0,05)
01_1_SRSF1_ENCSR066VOO_K562_activated	A1	0.262562	0.255704	0.268741	0.278058	[0,2712749406984033; 0,2845873957783785]	0	0	-	-			01_2_SRSF1_ENCSR094KBY_HepG2_activated	A1	0.270566	0.267093	0.269835	0.278183	[0,2707932212681737; 0,2854456694713597]	0.0217	0.031	-	-			01_3_SRSF1_GSE52834_GM19238_activated	A1	0.275277	0.267176	0.267176	0.277921	[0,26299320416573935; 0,2930023882133735]	0.3715	0.4699	=	=			01_4_SRSF1_GSE26463_HeLA_activated	A1	0.2602	0.257527	0.263978	0.278598	[0,26607936211427535; 0,29128241536171795]	0.0021	0.007	-	-
01_1_SRSF1_ENCSR066VOO_K562_activated	A1n2	0.290016	0.286741	0.301556	0.30386	[0,2982553360531751; 0,3095584523679045]	0	0	-	-			01_2_SRSF1_ENCSR094KBY_HepG2_activated	A1n2	0.296089	0.289854	0.30521	0.304047	[0,29789601693822765; 0,3101177462401987]	0.0055	0.01375	-	-			01_3_SRSF1_GSE52834_GM19238_activated	A1n2	0.29663	0.29084	0.306489	0.303661	[0,29092382392706606; 0,3160826618964649]	0.142	0.284	=	=			01_4_SRSF1_GSE26463_HeLA_activated	A1n2	0.293332	0.291935	0.305376	0.304412	[0,29367548341590416; 0,3151967421225318]	0.0219	0.05475	-	=
01_1_SRSF1_ENCSR066VOO_K562_activated	A2	0.31747	0.317778	0.33437	0.329663	[0,3219771042015941; 0,3373006578775703]	0.0006	0.001	-	-			01_2_SRSF1_ENCSR094KBY_HepG2_activated	A2	0.321611	0.312614	0.340585	0.329912	[0,3216123114121065; 0,33833724892136796]	0.025	0.03125	-	-			01_3_SRSF1_GSE52834_GM19238_activated	A2	0.317983	0.314504	0.345802	0.3294	[0,3122513761046832; 0,3465984416930727]	0.099	0.2475	=	=			01_4_SRSF1_GSE26463_HeLA_activated	A2	0.326465	0.326344	0.346774	0.330225	[0,3154716155378246; 0,3450207460117312]	0.3049	0.3049	=	=
01_1_SRSF1_ENCSR066VOO_K562_activated	A3	0.215771	0.216	0.220296	0.211244	[0,20232834814875866; 0,22043608200732587]	0.1616	0.179556	=	=			01_2_SRSF1_ENCSR094KBY_HepG2_activated	A3	0.225819	0.225594	0.234186	0.211949	[0,20216708057315286; 0,22198312466597456]	0.0046	0.01375	+	+			01_3_SRSF1_GSE52834_GM19238_activated	A3	0.249003	0.238931	0.239695	0.211952	[0,19160743656005988; 0,2325761956216985]	0.0002	0.001	+	+			01_4_SRSF1_GSE26463_HeLA_activated	A3	0.225296	0.238172	0.251613	0.212679	[0,19533167281957345; 0,22971411317289123]	0.0711	0.088875	=	=
01_1_SRSF1_ENCSR066VOO_K562_activated	C1	0.239387	0.231407	0.240296	0.23648	[0,22987771106372318; 0,243003844136257]	0.1961	0.1961	=	=			01_2_SRSF1_ENCSR094KBY_HepG2_activated	C1	0.244486	0.238757	0.245887	0.236423	[0,2292192031672724; 0,2437368458598414]	0.0155	0.0258333	+	+			01_3_SRSF1_GSE52834_GM19238_activated	C1	0.236282	0.229771	0.243511	0.236867	[0,2220663857490296; 0,25210991874189326]	0.4699	0.4699	=	=			01_4_SRSF1_GSE26463_HeLA_activated	C1	0.241732	0.22957	0.248925	0.235949	[0,22347327104369027; 0,24846715040083936]	0.188	0.208889	=	=
01_1_SRSF1_ENCSR066VOO_K562_activated	C1n2	0.232812	0.22763	0.233852	0.226614	[0,22179647364841104; 0,2315550315033975]	0.0066	0.00825	+	+			01_2_SRSF1_ENCSR094KBY_HepG2_activated	C1n2	0.233002	0.228793	0.233729	0.226686	[0,2212570348364908; 0,23209171658334457]	0.0106	0.0212	+	+			01_3_SRSF1_GSE52834_GM19238_activated	C1n2	0.228412	0.223282	0.232061	0.227489	[0,21653428292343518; 0,23891188426745402]	0.4284	0.4699	=	=			01_4_SRSF1_GSE26463_HeLA_activated	C1n2	0.23385	0.216935	0.23871	0.226201	[0,21705563029645858; 0,23542749544520847]	0.0535	0.088875	=	=
01_1_SRSF1_ENCSR066VOO_K562_activated	C2	0.226238	0.223852	0.227407	0.216747	[0,21030235499779412; 0,22315609142327375]	0.0018	0.00257143	+	+			01_2_SRSF1_ENCSR094KBY_HepG2_activated	C2	0.221519	0.21883	0.221572	0.21695	[0,20996021377751492; 0,22404168832000243]	0.107	0.107	=	=			01_3_SRSF1_GSE52834_GM19238_activated	C2	0.220542	0.216794	0.220611	0.218111	[0,20389143335077134; 0,23299603201709657]	0.373	0.4699	=	=			01_4_SRSF1_GSE26463_HeLA_activated	C2	0.225968	0.204301	0.228495	0.216453	[0,20441184533107695; 0,22882249191659665]	0.0638	0.088875	=	=
01_1_SRSF1_ENCSR066VOO_K562_activated	C3	0.255922	0.250222	0.258667	0.274135	[0,2639722396601019; 0,2843840293570416]	0.0001	0.0002	-	-			01_2_SRSF1_ENCSR094KBY_HepG2_activated	C3	0.251133	0.239671	0.25192	0.273461	[0,26220011328671206; 0,2847330201355066]	0	0	-	-			01_3_SRSF1_GSE52834_GM19238_activated	C3	0.235171	0.245802	0.233588	0.273874	[0,2514238417895766; 0,2968991408091614]	0.0002	0.001	-	-			01_4_SRSF1_GSE26463_HeLA_activated	C3	0.255397	0.237097	0.251613	0.272496	[0,25372864071855805; 0,2922994956207304]	0.0392	0.0784	*	=
01_1_SRSF1_ENCSR066VOO_K562_activated	G1	0.326748	0.334222	0.325778	0.311858	[0,3053255020392843; 0,3184557122560971]	0	0	+	+			01_2_SRSF1_ENCSR094KBY_HepG2_activated	G1	0.316823	0.319927	0.321572	0.312024	[0,3047443098089234; 0,3191771540758346]	0.0976	0.107	=	=			01_3_SRSF1_GSE52834_GM19238_activated	G1	0.310046	0.326718	0.315267	0.312077	[0,2970641695895603; 0,3272355323920279]	0.3992	0.4699	=	=			01_4_SRSF1_GSE26463_HeLA_activated	G1	0.339981	0.354839	0.33871	0.311956	[0,2991871851527274; 0,32467895800030216]	0	0	+	+
01_1_SRSF1_ENCSR066VOO_K562_activated	G1n2	0.261564	0.262815	0.257185	0.243901	[0,2392817042936007; 0,24854168374231395]	0	0	+	+			01_2_SRSF1_ENCSR094KBY_HepG2_activated	G1n2	0.254293	0.257313	0.251554	0.244039	[0,238953903806792; 0,24922002746454575]	0	0	+	+			01_3_SRSF1_GSE52834_GM19238_activated	G1n2	0.256905	0.262214	0.252672	0.244207	[0,2340176699074074; 0,25497576595574406]	0.0104	0.0346667	+	+			01_4_SRSF1_GSE26463_HeLA_activated	G1n2	0.274576	0.286022	0.270161	0.243788	[0,2349788525898498; 0,2526978480773583]	0	0	+	+
01_1_SRSF1_ENCSR066VOO_K562_activated	G2	0.19638	0.191407	0.188593	0.175945	[0,17006981070031352; 0,18188073084662526]	0	0	+	+			01_2_SRSF1_ENCSR094KBY_HepG2_activated	G2	0.191763	0.194698	0.181536	0.176053	[0,1697049993446059; 0,18268132758486674]	0	0	+	+			01_3_SRSF1_GSE52834_GM19238_activated	G2	0.203765	0.19771	0.190076	0.176337	[0,16319175682009315; 0,1898571406173965]	0.0001	0.001	+	+			01_4_SRSF1_GSE26463_HeLA_activated	G2	0.209171	0.217204	0.201613	0.17562	[0,16403467904684502; 0,18717500752740943]	0	0	+	+
01_1_SRSF1_ENCSR066VOO_K562_activated	G3	0.292227	0.286222	0.298815	0.274887	[0,26644099451279213; 0,283590130612643]	0.0001	0.000142857	+	+			01_2_SRSF1_ENCSR094KBY_HepG2_activated	G3	0.284558	0.287386	0.288848	0.274848	[0,2653527877480646; 0,2843929127173281]	0.0227	0.0324286	+	+			01_3_SRSF1_GSE52834_GM19238_activated	G3	0.277314	0.271756	0.287023	0.275107	[0,2557603657705575; 0,29429595754208276]	0.4142	0.460222	=	=			01_4_SRSF1_GSE26463_HeLA_activated	G3	0.291081	0.288172	0.293011	0.274315	[0,25787588462810934; 0,29090496320288134]	0.0233	0.029125	+	+
01_1_SRSF1_ENCSR066VOO_K562_activated	T1	0.171303	0.178667	0.165185	0.173604	[0,16800147660239595; 0,17920613547028025]	0.2067	0.229667	=	=			01_2_SRSF1_ENCSR094KBY_HepG2_activated	T1	0.168126	0.174223	0.162706	0.173369	[0,16727204447261096; 0,17968265605209177]	0.0465	0.058125	*	=			01_3_SRSF1_GSE52834_GM19238_activated	T1	0.178395	0.176336	0.174046	0.173134	[0,16042638201229661; 0,18614733295349567]	0.2054	0.293429	=	=			01_4_SRSF1_GSE26463_HeLA_activated	T1	0.158088	0.158065	0.148387	0.173498	[0,16302112607247005; 0,18434150142400682]	0.0016	0.00228571	-	-
01_1_SRSF1_ENCSR066VOO_K562_activated	T1n2	0.215607	0.222815	0.207407	0.225624	[0,22101687895140404; 0,23030252039507285]	0	0	-	-			01_2_SRSF1_ENCSR094KBY_HepG2_activated	T1n2	0.216616	0.22404	0.209506	0.225228	[0,21999309430616293; 0,23039490979099406]	0.0004	0.001	-	-			01_3_SRSF1_GSE52834_GM19238_activated	T1n2	0.218053	0.223664	0.208779	0.224643	[0,21409985981934343; 0,23526217887832412]	0.11	0.183333	=	=			01_4_SRSF1_GSE26463_HeLA_activated	T1n2	0.198242	0.205108	0.185753	0.2256	[0,2167999112113877; 0,2343505697974472]	0	0	-	-
01_1_SRSF1_ENCSR066VOO_K562_activated	T2	0.259912	0.266963	0.24963	0.277645	[0,2710629787150797; 0,28419797273521863]	0	0	-	-			01_2_SRSF1_ENCSR094KBY_HepG2_activated	T2	0.265107	0.273857	0.256307	0.277086	[0,26975186855909755; 0,284503387207101]	0.0006	0.0012	-	-			01_3_SRSF1_GSE52834_GM19238_activated	T2	0.257711	0.270992	0.243511	0.276152	[0,261226163579143; 0,29137991224651544]	0.0076	0.0253333	-	-			01_4_SRSF1_GSE26463_HeLA_activated	T2	0.238396	0.252151	0.223118	0.277702	[0,26487685615093554; 0,2902788277827809]	0	0	-	-
01_1_SRSF1_ENCSR066VOO_K562_activated	T3	0.23608	0.247556	0.222222	0.239734	[0,23106596507897156; 0,24838936568277017]	0.2012	0.229667	=	=			01_2_SRSF1_ENCSR094KBY_HepG2_activated	T3	0.23849	0.247349	0.225046	0.239742	[0,23032335981933716; 0,2492576110958518]	0.394	0.394	=	=			01_3_SRSF1_GSE52834_GM19238_activated	T3	0.238511	0.243511	0.239695	0.239067	[0,21993060782868945; 0,258225846752603]	0.4777	0.4777	=	=			01_4_SRSF1_GSE26463_HeLA_activated	T3	0.228227	0.236559	0.203763	0.24051	[0,2245483578518588; 0,2566042543143351]	0.0697	0.0774444	=	=
01_1_SRSF1_ENCSR066VOO_K562_activated	S1	0.566135	0.56563	0.566074	0.548338	[0,5403447982709741; 0,5563011855865825]	0	0	+	+			01_2_SRSF1_ENCSR094KBY_HepG2_activated	S1	0.561308	0.558684	0.567459	0.548448	[0,5395147082234555; 0,5571683360054287]	0.0022	0.00366667	+	+			01_3_SRSF1_GSE52834_GM19238_activated	S1	0.546328	0.556489	0.558779	0.548944	[0,5303252436900914; 0,5672697798766287]	0.3873	0.460222	=	=			01_4_SRSF1_GSE26463_HeLA_activated	S1	0.581712	0.584409	0.587634	0.547904	[0,5324426668441011; 0,5631161992436504]	0	0	+	+
01_1_SRSF1_ENCSR066VOO_K562_activated	S1n2	0.494377	0.490444	0.491037	0.470515	[0,4642726548154943; 0,47693083333180514]	0	0	+	+			01_2_SRSF1_ENCSR094KBY_HepG2_activated	S1n2	0.487295	0.486106	0.485283	0.470725	[0,46380430149108853; 0,477632964115632]	0	0	+	+			01_3_SRSF1_GSE52834_GM19238_activated	S1n2	0.485317	0.485496	0.484733	0.471696	[0,4574443916332337; 0,4862860457888577]	0.0327	0.0654	*	=			01_4_SRSF1_GSE26463_HeLA_activated	S1n2	0.508425	0.502957	0.508871	0.469989	[0,45831095264423727; 0,48196613092886625]	0	0	+	+
01_1_SRSF1_ENCSR066VOO_K562_activated	S2	0.422618	0.415259	0.416	0.392693	[0,38425593692640103; 0,401209511407179]	0	0	+	+			01_2_SRSF1_ENCSR094KBY_HepG2_activated	S2	0.413282	0.413528	0.403108	0.393002	[0,3838431443523903; 0,4021725919470183]	0	0	+	+			01_3_SRSF1_GSE52834_GM19238_activated	S2	0.424306	0.414504	0.410687	0.394448	[0,3753901836190112; 0,4141762071685099]	0.0025	0.0125	+	+			01_4_SRSF1_GSE26463_HeLA_activated	S2	0.435139	0.421505	0.430108	0.392073	[0,37582284727707693; 0,40810122165696266]	0	0	+	+
01_1_SRSF1_ENCSR066VOO_K562_activated	S3	0.548149	0.536444	0.557481	0.549022	[0,5341419224430417; 0,5639271839380288]	0.4527	0.4527	=	=			01_2_SRSF1_ENCSR094KBY_HepG2_activated	S3	0.535691	0.527057	0.540768	0.548309	[0,5317055794802785; 0,5647879150820114]	0.0681	0.0756667	=	=			01_3_SRSF1_GSE52834_GM19238_activated	S3	0.512485	0.517557	0.520611	0.548981	[0,5154891042529578; 0,5819471376520138]	0.0168	0.042	-	-			01_4_SRSF1_GSE26463_HeLA_activated	S3	0.546478	0.525269	0.544624	0.546811	[0,5190217285529781; 0,5751229815813332]	0.4976	0.4976	=	=
Project	ntp_info	frequencies_of_the_interest_set	frequencies_interest_set_5p	frequencies_interest_set_3p	average_frequencies_of_the_10000_sets	IC_95_of_the_10000_sets	p_values_like	BH_pcor	regulation_(p<=0,05)	reg(p_cor<=0,05)			Project	ntp_info	frequencies_of_the_interest_set	frequencies_interest_set_5p	frequencies_interest_set_3p	average_frequencies_of_the_10000_sets	IC_95_of_the_10000_sets	p_values_like	BH_pcor	regulation_(p<=0,05)	reg(p_cor<=0,05)			Project	ntp_info	frequencies_of_the_interest_set	frequencies_interest_set_5p	frequencies_interest_set_3p	average_frequencies_of_the_10000_sets	IC_95_of_the_10000_sets	p_values_like	BH_pcor	regulation_(p<=0,05)	reg(p_cor<=0,05)			Project	ntp_info	frequencies_of_the_interest_set	frequencies_interest_set_5p	frequencies_interest_set_3p	average_frequencies_of_the_10000_sets	IC_95_of_the_10000_sets	p_values_like	BH_pcor	regulation_(p<=0,05)	reg(p_cor<=0,05)
01_1_SRSF1_ENCSR066VOO_K562_repressed	A1	0.312225	0.297674	0.320543	0.283014	[0,27152586604050843; 0,29426803552338193]	0	0	+	+			01_2_SRSF1_ENCSR094KBY_HepG2_repressed	A1	0.28717	0.285714	0.299134	0.282519	[0,27039258237489044; 0,29468182830691114]	0.2259	0.2259	=	=			01_3_SRSF1_GSE52834_GM19238_repressed	A1	0.270192	0.277922	0.277922	0.279624	[0,2599823172091433; 0,29927902410050267]	0.1818	0.1818	=	=			01_4_SRSF1_GSE26463_HeLA_repressed	A1	0.264021	0.285714	0.260714	0.282376	[0,25865411572747754; 0,3071164791775769]	0.0653	0.0932857	=	=
01_1_SRSF1_ENCSR066VOO_K562_repressed	A1n2	0.319155	0.302713	0.33876	0.30859	[0,2991217429956878; 0,3180447533799615]	0.0156	0.0195	+	+			01_2_SRSF1_ENCSR094KBY_HepG2_repressed	A1n2	0.297039	0.287229	0.311472	0.308208	[0,29812313089255854; 0,31827269693884874]	0.0144	0.018	-	-			01_3_SRSF1_GSE52834_GM19238_repressed	A1n2	0.288571	0.285065	0.312987	0.305348	[0,28857963122956143; 0,3222390779649559]	0.0247	0.0352857	-	-			01_4_SRSF1_GSE26463_HeLA_repressed	A1n2	0.27294	0.272321	0.279464	0.307822	[0,28799633339450204; 0,3285145839702788]	0.0002	0.000666667	-	-
01_1_SRSF1_ENCSR066VOO_K562_repressed	A2	0.326086	0.307752	0.356977	0.334166	[0,3214485611316614; 0,3471939387661985]	0.1075	0.119444	=	=			01_2_SRSF1_ENCSR094KBY_HepG2_repressed	A2	0.306907	0.288745	0.32381	0.333896	[0,3201071056804202; 0,3475474001202425]	0	0	-	-			01_3_SRSF1_GSE52834_GM19238_repressed	A2	0.306949	0.292208	0.348052	0.331072	[0,30849730642736867; 0,3541572076359302]	0.017	0.0283333	-	-			01_4_SRSF1_GSE26463_HeLA_repressed	A2	0.281859	0.258929	0.298214	0.333269	[0,30647925493649386; 0,3609309495873577]	0	0	-	-
01_1_SRSF1_ENCSR066VOO_K562_repressed	A3	0.280528	0.265116	0.275194	0.22364	[0,20904219231271695; 0,23825178738988886]	0	0	+	+			01_2_SRSF1_ENCSR094KBY_HepG2_repressed	A3	0.245753	0.232468	0.255411	0.222525	[0,20707556115086284; 0,23788050386941373]	0.0021	0.003	+	+			01_3_SRSF1_GSE52834_GM19238_repressed	A3	0.246666	0.24026	0.246753	0.215449	[0,1892196223896014; 0,2423063407307996]	0.0123	0.0283333	+	+			01_4_SRSF1_GSE26463_HeLA_repressed	A3	0.260474	0.223214	0.241071	0.221648	[0,1904514295586119; 0,2536266957378691]	0.008	0.0133333	+	+
01_1_SRSF1_ENCSR066VOO_K562_repressed	C1	0.232634	0.225194	0.255426	0.231506	[0,22071785913625624; 0,2424418790675908]	0.4159	0.4159	=	=			01_2_SRSF1_ENCSR094KBY_HepG2_repressed	C1	0.224302	0.224675	0.233333	0.231794	[0,21988224468929352; 0,24367687207386787]	0.1103	0.122556	=	=			01_3_SRSF1_GSE52834_GM19238_repressed	C1	0.248954	0.232468	0.246753	0.234729	[0,21509543941703854; 0,25476744162276554]	0.0804	0.0893333	=	=			01_4_SRSF1_GSE26463_HeLA_repressed	C1	0.245001	0.228571	0.264286	0.232071	[0,20877022055655736; 0,2558005133316067]	0.1378	0.153111	=	=
01_1_SRSF1_ENCSR066VOO_K562_repressed	C1n2	0.23409	0.235078	0.244961	0.223536	[0,21539920856228645; 0,2317177183108155]	0.0061	0.00871429	+	+			01_2_SRSF1_ENCSR094KBY_HepG2_repressed	C1n2	0.236526	0.237662	0.245238	0.223595	[0,21488312871360288; 0,2323457936838227]	0.0018	0.003	+	+			01_3_SRSF1_GSE52834_GM19238_repressed	C1n2	0.243466	0.236364	0.241558	0.225555	[0,21139614580935873; 0,24031960481378245]	0.0091	0.0283333	+	+			01_4_SRSF1_GSE26463_HeLA_repressed	C1n2	0.249126	0.248214	0.269643	0.223817	[0,20709925121674996; 0,24155335504015674]	0.0021	0.0042	+	+
01_1_SRSF1_ENCSR066VOO_K562_repressed	C2	0.235546	0.244961	0.234496	0.215565	[0,20515350653364162; 0,2264268411135843]	0.0001	0.000166667	+	+			01_2_SRSF1_ENCSR094KBY_HepG2_repressed	C2	0.24875	0.250649	0.257143	0.215397	[0,204109515094127; 0,2267564960848444]	0	0	+	+			01_3_SRSF1_GSE52834_GM19238_repressed	C2	0.237977	0.24026	0.236364	0.216381	[0,19777727217892263; 0,23546879408472118]	0.0145	0.0283333	+	+			01_4_SRSF1_GSE26463_HeLA_repressed	C2	0.253251	0.267857	0.275	0.215562	[0,19310621531794006; 0,2388684922888131]	0.0004	0.001	+	+
01_1_SRSF1_ENCSR066VOO_K562_repressed	C3	0.209912	0.208915	0.21938	0.261242	[0,24611343662864638; 0,27711956108515495]	0	0	-	-			01_2_SRSF1_ENCSR094KBY_HepG2_repressed	C3	0.232099	0.238528	0.224675	0.262283	[0,24545904898156182; 0,27902191089652395]	0.0004	0.0008	-	-			01_3_SRSF1_GSE52834_GM19238_repressed	C3	0.227579	0.225974	0.22987	0.269717	[0,24071645018902968; 0,29993893276294625]	0.0029	0.0283333	-	-			01_4_SRSF1_GSE26463_HeLA_repressed	C3	0.241657	0.278571	0.257143	0.263132	[0,22958997967431333; 0,2969408223667643]	0.1056	0.132	=	=
01_1_SRSF1_ENCSR066VOO_K562_repressed	G1	0.255768	0.287597	0.234496	0.312367	[0,301182743711176; 0,3238331733768861]	0	0	-	-			01_2_SRSF1_ENCSR094KBY_HepG2_repressed	G1	0.27302	0.290043	0.271861	0.312225	[0,3000990707226205; 0,32443466226208467]	0	0	-	-			01_3_SRSF1_GSE52834_GM19238_repressed	G1	0.290312	0.319481	0.271429	0.311954	[0,29218359788974674; 0,3323346414607097]	0.017	0.0283333	-	-			01_4_SRSF1_GSE26463_HeLA_repressed	G1	0.264962	0.291071	0.255357	0.312274	[0,28843097707554527; 0,33692466554379324]	0	0	-	-
01_1_SRSF1_ENCSR066VOO_K562_repressed	G1n2	0.21011	0.223643	0.196318	0.243152	[0,23520560592088943; 0,25124946781618923]	0	0	-	-			01_2_SRSF1_ENCSR094KBY_HepG2_repressed	G1n2	0.22416	0.237229	0.216667	0.243113	[0,23500484906343136; 0,25158524989131603]	0	0	-	-			01_3_SRSF1_GSE52834_GM19238_repressed	G1n2	0.233159	0.26039	0.214286	0.243693	[0,22974082847971367; 0,25820697572945855]	0.0732	0.0893333	=	=			01_4_SRSF1_GSE26463_HeLA_repressed	G1n2	0.237944	0.248214	0.223214	0.243208	[0,22656765062847917; 0,2604817778172582]	0.2685	0.2685	=	=
01_1_SRSF1_ENCSR066VOO_K562_repressed	G2	0.164453	0.15969	0.15814	0.173936	[0,16403040904406843; 0,18407215687946368]	0.0305	0.038125	*	*			01_2_SRSF1_ENCSR094KBY_HepG2_repressed	G2	0.175299	0.184416	0.161472	0.174001	[0,1635515457966105; 0,18475642140616427]	0.3972	0.3972	=	=			01_3_SRSF1_GSE52834_GM19238_repressed	G2	0.176007	0.201299	0.157143	0.175433	[0,15772260304106417; 0,19407898068383053]	0.4673	0.4673	=	=			01_4_SRSF1_GSE26463_HeLA_repressed	G2	0.210926	0.205357	0.191071	0.174142	[0,1532116106973569; 0,19615574812413636]	0.0007	0.00233333	+	+
01_1_SRSF1_ENCSR066VOO_K562_repressed	G3	0.238848	0.225194	0.231395	0.270513	[0,25662671741453924; 0,2847595637597732]	0	0	-	-			01_2_SRSF1_ENCSR094KBY_HepG2_repressed	G3	0.246323	0.230736	0.245022	0.27072	[0,25622811221726083; 0,28568413706814777]	0.0006	0.000857143	-	-			01_3_SRSF1_GSE52834_GM19238_repressed	G3	0.256307	0.231169	0.261039	0.273297	[0,24774993541694293; 0,299867007700461]	0.0992	0.165333	=	=			01_4_SRSF1_GSE26463_HeLA_repressed	G3	0.246537	0.235714	0.228571	0.271124	[0,24167067670726589; 0,30238257094841575]	0.0519	0.0576667	=	=
01_1_SRSF1_ENCSR066VOO_K562_repressed	T1	0.199374	0.189535	0.189535	0.173112	[0,16364880662515338; 0,18250445441205027]	0	0	+	+			01_2_SRSF1_ENCSR094KBY_HepG2_repressed	T1	0.215507	0.199567	0.195671	0.173462	[0,16351805953069315; 0,1835139358948921]	0	0	+	+			01_3_SRSF1_GSE52834_GM19238_repressed	T1	0.190542	0.17013	0.203896	0.173694	[0,1572210979841101; 0,19065647266428548]	0.026	0.0866667	*	=			01_4_SRSF1_GSE26463_HeLA_repressed	T1	0.226016	0.194643	0.219643	0.173279	[0,15344447488176235; 0,19408264970172084]	0	0	+	+
01_1_SRSF1_ENCSR066VOO_K562_repressed	T1n2	0.236645	0.238566	0.219961	0.224723	[0,21702355706476936; 0,23258023965792973]	0.0012	0.00171429	+	+			01_2_SRSF1_ENCSR094KBY_HepG2_repressed	T1n2	0.242275	0.237879	0.226623	0.225084	[0,21683135040261448; 0,23341406321505637]	0	0	+	+			01_3_SRSF1_GSE52834_GM19238_repressed	T1n2	0.234805	0.218182	0.231169	0.225404	[0,2115485745398185; 0,2391588940106928]	0.0939	0.165333	=	=			01_4_SRSF1_GSE26463_HeLA_repressed	T1n2	0.23999	0.23125	0.227679	0.225153	[0,20900866911419602; 0,24179726730537232]	0.04	0.050375	*	=
01_1_SRSF1_ENCSR066VOO_K562_repressed	T2	0.273915	0.287597	0.250388	0.276333	[0,26515984951968213; 0,28769636170768065]	0.3356	0.3356	=	=			01_2_SRSF1_ENCSR094KBY_HepG2_repressed	T2	0.269043	0.27619	0.257576	0.276705	[0,2651171892067534; 0,28859860055997544]	0.1037	0.129625	=	=			01_3_SRSF1_GSE52834_GM19238_repressed	T2	0.279067	0.266234	0.258442	0.277114	[0,257133640988233; 0,2971852868616884]	0.4275	0.4673	=	=			01_4_SRSF1_GSE26463_HeLA_repressed	T2	0.253964	0.267857	0.235714	0.277027	[0,25332156184183924; 0,30101401460173466]	0.0277	0.050375	*	=
01_1_SRSF1_ENCSR066VOO_K562_repressed	T3	0.270712	0.300775	0.274031	0.244605	[0,2309689326755214; 0,25832254280014616]	0.0001	0.000166667	+	+			01_2_SRSF1_ENCSR094KBY_HepG2_repressed	T3	0.275825	0.298268	0.274892	0.244472	[0,22997920960408982; 0,2589862056483273]	0	0	+	+			01_3_SRSF1_GSE52834_GM19238_repressed	T3	0.269448	0.302597	0.262338	0.241537	[0,21603075130078275; 0,26748303524351175]	0.0173	0.0865	+	=			01_4_SRSF1_GSE26463_HeLA_repressed	T3	0.251331	0.2625	0.273214	0.244096	[0,21479331176158895; 0,2738972275370928]	0.3131	0.3131	=	=
01_1_SRSF1_ENCSR066VOO_K562_repressed	S1	0.488401	0.512791	0.489922	0.543873	[0,5306093396638307; 0,5575623866859984]	0	0	-	-			01_2_SRSF1_ENCSR094KBY_HepG2_repressed	S1	0.497323	0.514719	0.505195	0.544019	[0,5297756989535345; 0,5583262498333121]	0	0	-	-			01_3_SRSF1_GSE52834_GM19238_repressed	S1	0.539266	0.551948	0.518182	0.546682	[0,522806007792351; 0,5707575073003728]	0.2671	0.333875	=	=			01_4_SRSF1_GSE26463_HeLA_repressed	S1	0.509963	0.519643	0.519643	0.544345	[0,5153446814777601; 0,572685214087261]	0.0104	0.026	-	-
01_1_SRSF1_ENCSR066VOO_K562_repressed	S1n2	0.4442	0.458721	0.441279	0.466687	[0,45607929660890767; 0,47722327751498383]	0	0	-	-			01_2_SRSF1_ENCSR094KBY_HepG2_repressed	S1n2	0.460686	0.474892	0.461905	0.466709	[0,45561610915566186; 0,4778216420452759]	0.1384	0.153778	=	=			01_3_SRSF1_GSE52834_GM19238_repressed	S1n2	0.476625	0.496753	0.455844	0.469248	[0,451108126520872; 0,48875851190322245]	0.2163	0.309	=	=			01_4_SRSF1_GSE26463_HeLA_repressed	S1n2	0.48707	0.496429	0.492857	0.467025	[0,4449398467008604; 0,4899367446043684]	0.0403	0.050375	*	=
01_1_SRSF1_ENCSR066VOO_K562_repressed	S2	0.399999	0.404651	0.392636	0.389501	[0,3754516045754589; 0,40379106455823327]	0.0731	0.0812222	=	=			01_2_SRSF1_ENCSR094KBY_HepG2_repressed	S2	0.424049	0.435065	0.418615	0.389398	[0,3745589147527679; 0,4040408536938619]	0	0	+	+			01_3_SRSF1_GSE52834_GM19238_repressed	S2	0.413984	0.441558	0.393506	0.391814	[0,3675625338972683; 0,4171184313411498]	0.0449	0.11225	*	=			01_4_SRSF1_GSE26463_HeLA_repressed	S2	0.464176	0.473214	0.466071	0.389705	[0,36066240748246137; 0,4199055655179858]	0	0	+	+
01_1_SRSF1_ENCSR066VOO_K562_repressed	S3	0.44876	0.434109	0.450775	0.531755	[0,5086713305534997; 0,554674809299354]	0	0	-	-			01_2_SRSF1_ENCSR094KBY_HepG2_repressed	S3	0.478422	0.469264	0.469697	0.533003	[0,5087583614947682; 0,557299010380226]	0	0	-	-			01_3_SRSF1_GSE52834_GM19238_repressed	S3	0.483886	0.457143	0.490909	0.543014	[0,5000321258179593; 0,5866757069913336]	0.0046	0.046	-	-			01_4_SRSF1_GSE26463_HeLA_repressed	S3	0.488195	0.514286	0.485714	0.534256	[0,4844637571570547; 0,5840603903178645]	0.0349	0.050375	*	=

## Sheet: Amino Acids
Project	amino_acid	encoding_codons	frequencies_of_the_interest_set	frequencies_interest_set_5p	frequencies_interest_set_3p	average_frequencies_of_the_10000_sets		p_values_like	FDR	regulation_(p<=0,05)	regulation(fdr<=0,05)			Project	amino_acid	encoding_codons	frequencies_of_the_interest_set	frequencies_interest_set_5p	frequencies_interest_set_3p	average_frequencies_of_the_10000_sets		p_values_like	FDR	regulation_(p<=0,05)	regulation(fdr<=0,05)			Project	amino_acid	encoding_codons	frequencies_of_the_interest_set	frequencies_interest_set_5p	frequencies_interest_set_3p	average_frequencies_of_the_10000_sets		p_values_like	FDR	regulation_(p<=0,05)	regulation(fdr<=0,05)			Project	amino_acid	encoding_codons	frequencies_of_the_interest_set	frequencies_interest_set_5p	frequencies_interest_set_3p	average_frequencies_of_the_10000_sets
01_1_SRSF1_K562_ENCSR066VOO_activated	*	TAA,TAG,TGA	0.002169	0	0.00414815	0.000205627	954.822	0	0	+	+			01_2_SRSF1_HepG2_ENCSR094KBY_activated	*	TAA,TAG,TGA	0.00202529	0	0.00310786	0.000225877	796.635	0	0	+	+			01_3_SRSF1_GM19238_GSE52834_activated	*	TAA,TAG,TGA	0.00253796	0	0.00458015	0.000246447	929.819	0	0	+	+			01_4_SRSF1_Hela_GSE26463_activated	*	TAA,TAG,TGA	0.00137354	0	0.00107527	0.00021323	544.16
01_1_SRSF1_K562_ENCSR066VOO_activated	A	GCT,GCC,GCA,GCG	0.0671933	0.0672593	0.0694815	0.0647812	3.72355	0.0844	0.1055	=	=			01_2_SRSF1_HepG2_ENCSR094KBY_activated	A	GCT,GCC,GCA,GCG	0.0638195	0.0628885	0.0698355	0.0647596	-1.45174	0.316	0.351111	=	=			01_3_SRSF1_GM19238_GSE52834_activated	A	GCT,GCC,GCA,GCG	0.0586643	0.0603053	0.0618321	0.064968	-9.70277	0.0538	0.0896667	=	=			01_4_SRSF1_Hela_GSE26463_activated	A	GCT,GCC,GCA,GCG	0.068828	0.0645161	0.0693548	0.0646359	6.4857
01_1_SRSF1_K562_ENCSR066VOO_activated	C	TGT,TGC	0.0205147	0.0219259	0.0177778	0.0226024	-9.23674	0.0401	0.0572857	-	=			01_2_SRSF1_HepG2_ENCSR094KBY_activated	C	TGT,TGC	0.017752	0.0197441	0.0137112	0.0225101	-21.1377	0	0	-	-			01_3_SRSF1_GM19238_GSE52834_activated	C	TGT,TGC	0.0189438	0.0198473	0.019084	0.0223646	-15.2956	0.1062	0.13275	=	=			01_4_SRSF1_Hela_GSE26463_activated	C	TGT,TGC	0.0181248	0.0188172	0.0139785	0.022453	-19.2769
01_1_SRSF1_K562_ENCSR066VOO_activated	D	GAT,GAC	0.0551425	0.0561481	0.0551111	0.050972	8.18205	0.0028	0.00466667	+	+			01_2_SRSF1_HepG2_ENCSR094KBY_activated	D	GAT,GAC	0.0505141	0.0469835	0.0522852	0.0509746	-0.90331	0.3955	0.3955	=	=			01_3_SRSF1_GM19238_GSE52834_activated	D	GAT,GAC	0.0523313	0.0526718	0.048855	0.0508841	2.84411	0.3276	0.3617	=	=			01_4_SRSF1_Hela_GSE26463_activated	D	GAT,GAC	0.0526195	0.0510753	0.0489247	0.051058	3.05833
01_1_SRSF1_K562_ENCSR066VOO_activated	E	GAA,GAG	0.0755105	0.0687407	0.0837037	0.0735932	2.60517	0.1674	0.186	=	=			01_2_SRSF1_HepG2_ENCSR094KBY_activated	E	GAA,GAG	0.0749965	0.0723949	0.0784278	0.0736494	1.82909	0.2758	0.34475	=	=			01_3_SRSF1_GM19238_GSE52834_activated	E	GAA,GAG	0.0797994	0.0770992	0.0862595	0.0737078	8.2645	0.0952	0.13275	=	=			01_4_SRSF1_Hela_GSE26463_activated	E	GAA,GAG	0.0824865	0.0801075	0.0897849	0.0737625	11.8272
01_1_SRSF1_K562_ENCSR066VOO_activated	F	TTT,TTC	0.035244	0.034963	0.034963	0.0394062	-10.5622	0.0011	0.0022	-	-			01_2_SRSF1_HepG2_ENCSR094KBY_activated	F	TTT,TTC	0.0361612	0.0398537	0.0363803	0.0393339	-8.06622	0.0159	0.0318	-	-			01_3_SRSF1_GM19238_GSE52834_activated	F	TTT,TTC	0.0329726	0.0328244	0.0312977	0.0390974	-15.6654	0.019	0.0475	-	-			01_4_SRSF1_Hela_GSE26463_activated	F	TTT,TTC	0.0327936	0.0327957	0.0306452	0.0394619	-16.8981
01_1_SRSF1_K562_ENCSR066VOO_activated	G	GGT,GGC,GGA,GGG	0.0741899	0.0762963	0.0711111	0.059783	24.0987	0	0	+	+			01_2_SRSF1_HepG2_ENCSR094KBY_activated	G	GGT,GGC,GGA,GGG	0.072665	0.0755027	0.071298	0.0600543	20.9988	0	0	+	+			01_3_SRSF1_GM19238_GSE52834_activated	G	GGT,GGC,GGA,GGG	0.071742	0.0755725	0.0694656	0.0602282	19.117	0.006	0.026	+	+			01_4_SRSF1_Hela_GSE26463_activated	G	GGT,GGC,GGA,GGG	0.0866947	0.0962366	0.0897849	0.0598925	44.7505
01_1_SRSF1_K562_ENCSR066VOO_activated	H	CAT,CAC	0.0262845	0.028	0.029037	0.025427	3.37217	0.2033	0.2033	=	=			01_2_SRSF1_HepG2_ENCSR094KBY_activated	H	CAT,CAC	0.0276933	0.025777	0.0301645	0.0253579	9.20954	0.0235	0.0391667	+	+			01_3_SRSF1_GM19238_GSE52834_activated	H	CAT,CAC	0.026164	0.0267176	0.0282443	0.0253851	3.06858	0.3617	0.3617	=	=			01_4_SRSF1_Hela_GSE26463_activated	H	CAT,CAC	0.0272415	0.0301075	0.0301075	0.0253408	7.5005
01_1_SRSF1_K562_ENCSR066VOO_activated	I	ATT,ATC,ATA	0.0430655	0.0392593	0.0444444	0.0500703	-13.9899	0	0	-	-			01_2_SRSF1_HepG2_ENCSR094KBY_activated	I	ATT,ATC,ATA	0.0473087	0.0444241	0.0493601	0.0500044	-5.39089	0.05	0.0714286	*	=			01_3_SRSF1_GM19238_GSE52834_activated	I	ATT,ATC,ATA	0.0435366	0.0435115	0.0389313	0.0496	-12.2246	0.032	0.064	*	=			01_4_SRSF1_Hela_GSE26463_activated	I	ATT,ATC,ATA	0.0403444	0.0408602	0.0344086	0.0502352	-19.689
01_1_SRSF1_K562_ENCSR066VOO_activated	K	AAA,AAG	0.0539725	0.056	0.0602963	0.0626493	-13.8498	0	0	-	-			01_2_SRSF1_HepG2_ENCSR094KBY_activated	K	AAA,AAG	0.0565836	0.0575868	0.0625229	0.0627691	-9.85446	0.0016	0.004	-	-			01_3_SRSF1_GM19238_GSE52834_activated	K	AAA,AAG	0.0525546	0.048855	0.0519084	0.0626547	-16.1202	0.0078	0.026	-	-			01_4_SRSF1_Hela_GSE26463_activated	K	AAA,AAG	0.0542698	0.0553763	0.0623656	0.0631309	-14.0361
01_1_SRSF1_K562_ENCSR066VOO_activated	L	TTA,TTG,CTT,CTC,CTA,CTG	0.102801	0.100889	0.103852	0.103137	-0.325795	0.439	0.439	=	=			01_2_SRSF1_HepG2_ENCSR094KBY_activated	L	TTA,TTG,CTT,CTC,CTA,CTG	0.102098	0.100731	0.101828	0.102936	-0.813854	0.3567	0.3567	=	=			01_3_SRSF1_GM19238_GSE52834_activated	L	TTA,TTG,CTT,CTC,CTA,CTG	0.104045	0.108397	0.10458	0.1027	1.30998	0.3914	0.43054	=	=			01_4_SRSF1_Hela_GSE26463_activated	L	TTA,TTG,CTT,CTC,CTA,CTG	0.0930268	0.0956989	0.0946237	0.103013	-9.69407
01_1_SRSF1_K562_ENCSR066VOO_activated	M	ATG	0.0220724	0.0260741	0.02	0.0224768	-1.79901	0.3371	0.412011	=	=			01_2_SRSF1_HepG2_ENCSR094KBY_activated	M	ATG	0.0230012	0.026691	0.0190128	0.0224997	2.22911	0.3182	0.35002	=	=			01_3_SRSF1_GM19238_GSE52834_activated	M	ATG	0.0234726	0.0251908	0.0198473	0.0224375	4.61344	0.3137	0.43054	=	=			01_4_SRSF1_Hela_GSE26463_activated	M	ATG	0.0206195	0.0198925	0.0225806	0.0225553	-8.58212
01_1_SRSF1_K562_ENCSR066VOO_activated	N	AAT,AAC	0.0310785	0.0339259	0.0291852	0.0393794	-21.0793	0	0	-	-			01_2_SRSF1_HepG2_ENCSR094KBY_activated	N	AAT,AAC	0.0325905	0.0338208	0.0321755	0.0393635	-17.2062	0	0	-	-			01_3_SRSF1_GM19238_GSE52834_activated	N	AAT,AAC	0.0350012	0.0374046	0.0335878	0.0392309	-10.7814	0.0711	0.195525	=	=			01_4_SRSF1_Hela_GSE26463_activated	N	AAT,AAC	0.0306452	0.0360215	0.0311828	0.0394354	-22.2903
01_1_SRSF1_K562_ENCSR066VOO_activated	P	CCT,CCC,CCA,CCG	0.0563754	0.0542222	0.0543704	0.0536651	5.05034	0.074	0.115913	=	=			01_2_SRSF1_HepG2_ENCSR094KBY_activated	P	CCT,CCC,CCA,CCG	0.0581802	0.0579525	0.0542962	0.0539192	7.9026	0.0217	0.04774	+	+			01_3_SRSF1_GM19238_GSE52834_activated	P	CCT,CCC,CCA,CCG	0.0570062	0.051145	0.051145	0.0544781	4.64042	0.2736	0.429943	=	=			01_4_SRSF1_Hela_GSE26463_activated	P	CCT,CCC,CCA,CCG	0.0566513	0.0483871	0.0575269	0.0536567	5.581
01_1_SRSF1_K562_ENCSR066VOO_activated	Q	CAA,CAG	0.0504545	0.0484444	0.0488889	0.0483296	4.39656	0.0843	0.115913	=	=			01_2_SRSF1_HepG2_ENCSR094KBY_activated	Q	CAA,CAG	0.0514023	0.0515539	0.0566728	0.0483612	6.28826	0.0375	0.0601857	*	=			01_3_SRSF1_GM19238_GSE52834_activated	Q	CAA,CAG	0.0515087	0.051145	0.0587786	0.0483696	6.48983	0.1834	0.390867	=	=			01_4_SRSF1_Hela_GSE26463_activated	Q	CAA,CAG	0.0537299	0.0526882	0.0564516	0.0482643	11.3245
01_1_SRSF1_K562_ENCSR066VOO_activated	R	CGT,CGC,CGA,CGG,AGA,AGG	0.0550083	0.0487407	0.0582222	0.0523809	5.016	0.0493	0.10846	+	=			01_2_SRSF1_HepG2_ENCSR094KBY_activated	R	CGT,CGC,CGA,CGG,AGA,AGG	0.055174	0.0537477	0.0530165	0.0523534	5.38746	0.0584	0.0803	=	=			01_3_SRSF1_GM19238_GSE52834_activated	R	CGT,CGC,CGA,CGG,AGA,AGG	0.057814	0.0541985	0.0549618	0.0524572	10.2117	0.0672	0.195525	=	=			01_4_SRSF1_Hela_GSE26463_activated	R	CGT,CGC,CGA,CGG,AGA,AGG	0.0589096	0.0505376	0.0591398	0.0522016	12.8503
01_1_SRSF1_K562_ENCSR066VOO_activated	S	TCT,TCC,TCA,TCG,AGT,AGC	0.0823375	0.0826667	0.0768889	0.0742611	10.8758	0	0	+	+			01_2_SRSF1_HepG2_ENCSR094KBY_activated	S	TCT,TCC,TCA,TCG,AGT,AGC	0.0803874	0.0804388	0.0734918	0.0742654	8.24341	0.0027	0.0099	+	+			01_3_SRSF1_GM19238_GSE52834_activated	S	TCT,TCC,TCA,TCG,AGT,AGC	0.0850328	0.0854962	0.0816794	0.0748182	13.6525	0.0111	0.06105	+	=			01_4_SRSF1_Hela_GSE26463_activated	S	TCT,TCC,TCA,TCG,AGT,AGC	0.0842823	0.0892473	0.0747312	0.0740553	13.81
01_1_SRSF1_K562_ENCSR066VOO_activated	T	ACT,ACC,ACA,ACG	0.0519696	0.0482963	0.0545185	0.0524182	-0.8558	0.3831	0.42141	=	=			01_2_SRSF1_HepG2_ENCSR094KBY_activated	T	ACT,ACC,ACA,ACG	0.0504879	0.0471664	0.0517367	0.0524131	-3.67308	0.116	0.141778	=	=			01_3_SRSF1_GM19238_GSE52834_activated	T	ACT,ACC,ACA,ACG	0.0534885	0.051145	0.0587786	0.0524711	1.93912	0.3718	0.43054	=	=			01_4_SRSF1_Hela_GSE26463_activated	T	ACT,ACC,ACA,ACG	0.0496336	0.0408602	0.0537634	0.0523413	-5.17302
01_1_SRSF1_K562_ENCSR066VOO_activated	V	GTT,GTC,GTA,GTG	0.0561977	0.0657778	0.0463704	0.0626909	-10.3575	0.0001	0.000275	-	-			01_2_SRSF1_HepG2_ENCSR094KBY_activated	V	GTT,GTC,GTA,GTG	0.0566748	0.0621572	0.0497258	0.0626103	-9.48007	0.0006	0.0033	-	-			01_3_SRSF1_GM19238_GSE52834_activated	V	GTT,GTC,GTA,GTG	0.0541614	0.0610687	0.048855	0.0624364	-13.2535	0.0098	0.06105	-	=			01_4_SRSF1_Hela_GSE26463_activated	V	GTT,GTC,GTA,GTG	0.0512931	0.0629032	0.0408602	0.0625915	-18.051
01_1_SRSF1_K562_ENCSR066VOO_activated	W	TGG	0.0137012	0.0158519	0.0121481	0.012604	8.70573	0.0665	0.115913	=	=			01_2_SRSF1_HepG2_ENCSR094KBY_activated	W	TGG	0.0140006	0.0160878	0.0140768	0.0125572	11.4946	0.0383	0.0601857	*	=			01_3_SRSF1_GM19238_GSE52834_activated	W	TGG	0.0123713	0.0167939	0.0122137	0.0125288	-1.25669	0.4757	0.4757	=	=			01_4_SRSF1_Hela_GSE26463_activated	W	TGG	0.0107332	0.0129032	0.0107527	0.012547	-14.4561
01_1_SRSF1_K562_ENCSR066VOO_activated	Y	TAT,TAC	0.0247179	0.0265185	0.0254815	0.0291673	-15.2547	0	0	-	-			01_2_SRSF1_HepG2_ENCSR094KBY_activated	Y	TAT,TAC	0.0264842	0.0244973	0.0268739	0.0290822	-8.93339	0.0186	0.04774	-	-			01_3_SRSF1_GM19238_GSE52834_activated	Y	TAT,TAC	0.0268517	0.0206107	0.0351145	0.0289363	-7.20423	0.2132	0.390867	=	=			01_4_SRSF1_Hela_GSE26463_activated	Y	TAT,TAC	0.0256992	0.0209677	0.027957	0.0291548	-11.8528
Project	amino_acid	encoding_codons	frequencies_of_the_interest_set	frequencies_interest_set_5p	frequencies_interest_set_3p	average_frequencies_of_the_10000_sets		p_values_like	FDR	regulation_(p<=0,05)	regulation(fdr<=0,05)			Project	amino_acid	encoding_codons	frequencies_of_the_interest_set	frequencies_interest_set_5p	frequencies_interest_set_3p	average_frequencies_of_the_10000_sets		p_values_like	FDR	regulation_(p<=0,05)	regulation(fdr<=0,05)			Project	amino_acid	encoding_codons	frequencies_of_the_interest_set	frequencies_interest_set_5p	frequencies_interest_set_3p	average_frequencies_of_the_10000_sets		p_values_like	FDR	regulation_(p<=0,05)	regulation(fdr<=0,05)			Project	amino_acid	encoding_codons	frequencies_of_the_interest_set	frequencies_interest_set_5p	frequencies_interest_set_3p	average_frequencies_of_the_10000_sets
01_1_SRSF1_K562_ENCSR066VOO_repressed	*	TAA,TAG,TGA	0.00671847	0.000387597	0.00620155	0.000420546	1497.56	0	0	+	+			01_2_SRSF1_HepG2_ENCSR094KBY_repressed	*	TAA,TAG,TGA	0.00580083	0.0004329	0.00562771	0.000388126	1394.58	0	0	+	+			01_3_SRSF1_GM19238_GSE52834_repressed	*	TAA,TAG,TGA	0.00407575	0	0.00519481	0.000270325	1407.72	0	0	+	+			01_4_SRSF1_Hela_GSE26463_repressed	*	TAA,TAG,TGA	0.0066041	0.00178571	0.00535714	0.000375624	1658.17
01_1_SRSF1_K562_ENCSR066VOO_repressed	A	GCT,GCC,GCA,GCG	0.0554901	0.0581395	0.05	0.0632925	-12.3275	0.0039	0.00557143	-	-			01_2_SRSF1_HepG2_ENCSR094KBY_repressed	A	GCT,GCC,GCA,GCG	0.0645839	0.0606061	0.0619048	0.0633624	1.92777	0.341	0.378889	=	=			01_3_SRSF1_GM19238_GSE52834_repressed	A	GCT,GCC,GCA,GCG	0.0663585	0.0675325	0.0675325	0.064253	3.27704	0.3398	0.377556	=	=			01_4_SRSF1_Hela_GSE26463_repressed	A	GCT,GCC,GCA,GCG	0.0586133	0.0714286	0.05	0.0635339	-7.74492
01_1_SRSF1_K562_ENCSR066VOO_repressed	C	TGT,TGC	0.020916	0.0228682	0.0205426	0.0216654	-3.45896	0.3533	0.392556	=	=			01_2_SRSF1_HepG2_ENCSR094KBY_repressed	C	TGT,TGC	0.0202358	0.0233766	0.017316	0.0218231	-7.2735	0.2258	0.28225	=	=			01_3_SRSF1_GM19238_GSE52834_repressed	C	TGT,TGC	0.0183898	0.0155844	0.0194805	0.0223295	-17.6436	0.1359	0.194143	=	=			01_4_SRSF1_Hela_GSE26463_repressed	C	TGT,TGC	0.0281946	0.0446429	0.025	0.0218111	29.2671
01_1_SRSF1_K562_ENCSR066VOO_repressed	D	GAT,GAC	0.0388675	0.0426357	0.0306202	0.0515233	-24.5632	0	0	-	-			01_2_SRSF1_HepG2_ENCSR094KBY_repressed	D	GAT,GAC	0.0382846	0.0437229	0.0385281	0.051426	-25.554	0	0	-	-			01_3_SRSF1_GM19238_GSE52834_repressed	D	GAT,GAC	0.0421171	0.0597403	0.0337662	0.0511395	-17.6426	0.0199	0.04975	-	-			01_4_SRSF1_Hela_GSE26463_repressed	D	GAT,GAC	0.0402164	0.0410714	0.0285714	0.0513387	-21.6645
01_1_SRSF1_K562_ENCSR066VOO_repressed	E	GAA,GAG	0.0648164	0.0689922	0.0631783	0.0748216	-13.3721	0.0014	0.00266667	-	-			01_2_SRSF1_HepG2_ENCSR094KBY_repressed	E	GAA,GAG	0.061131	0.0619048	0.0619048	0.0746271	-18.0848	0.0001	0.000333333	-	-			01_3_SRSF1_GM19238_GSE52834_repressed	E	GAA,GAG	0.0648618	0.0675325	0.0636364	0.0739055	-12.2368	0.0701	0.120333	=	=			01_4_SRSF1_Hela_GSE26463_repressed	E	GAA,GAG	0.0538863	0.0535714	0.0571429	0.074454	-27.6248
01_1_SRSF1_K562_ENCSR066VOO_repressed	F	TTT,TTC	0.033323	0.0360465	0.0341085	0.0395462	-15.7365	0.0016	0.00266667	-	-			01_2_SRSF1_HepG2_ENCSR094KBY_repressed	F	TTT,TTC	0.0393839	0.0372294	0.0367965	0.0395904	-0.521586	0.4713	0.4713	=	=			01_3_SRSF1_GM19238_GSE52834_repressed	F	TTT,TTC	0.0359125	0.0337662	0.0415584	0.0395782	-9.26192	0.1839	0.229875	=	=			01_4_SRSF1_Hela_GSE26463_repressed	F	TTT,TTC	0.0347489	0.0321429	0.0446429	0.039612	-12.2768
01_1_SRSF1_K562_ENCSR066VOO_repressed	G	GGT,GGC,GGA,GGG	0.0450364	0.0515504	0.0437984	0.0612099	-26.423	0	0	-	-			01_2_SRSF1_HepG2_ENCSR094KBY_repressed	G	GGT,GGC,GGA,GGG	0.0528688	0.0571429	0.0502165	0.0609368	-13.2399	0.0102	0.017	-	-			01_3_SRSF1_GM19238_GSE52834_repressed	G	GGT,GGC,GGA,GGG	0.0467797	0.0493506	0.0428571	0.0602197	-22.3183	0.0059	0.0295	-	-			01_4_SRSF1_Hela_GSE26463_repressed	G	GGT,GGC,GGA,GGG	0.0496287	0.0428571	0.0571429	0.060864	-18.4597
01_1_SRSF1_K562_ENCSR066VOO_repressed	H	CAT,CAC	0.0301505	0.0271318	0.0356589	0.0247294	21.922	0.0014	0.00266667	+	+			01_2_SRSF1_HepG2_ENCSR094KBY_repressed	H	CAT,CAC	0.0277293	0.0251082	0.0272727	0.0248144	11.7466	0.0603	0.0861429	=	=			01_3_SRSF1_GM19238_GSE52834_repressed	H	CAT,CAC	0.0255315	0.0168831	0.0363636	0.0252171	1.24658	0.4523	0.4523	=	=			01_4_SRSF1_Hela_GSE26463_repressed	H	CAT,CAC	0.0311042	0.0267857	0.0357143	0.0248686	25.074
01_1_SRSF1_K562_ENCSR066VOO_repressed	I	ATT,ATC,ATA	0.051956	0.0534884	0.0515504	0.0506941	2.48927	0.309	0.38625	=	=			01_2_SRSF1_HepG2_ENCSR094KBY_repressed	I	ATT,ATC,ATA	0.0432889	0.0454545	0.0467532	0.050701	-14.6194	0.0024	0.006	-	-			01_3_SRSF1_GM19238_GSE52834_repressed	I	ATT,ATC,ATA	0.0401922	0.038961	0.0337662	0.0503576	-20.1863	0.0107	0.0356667	-	-			01_4_SRSF1_Hela_GSE26463_repressed	I	ATT,ATC,ATA	0.0441436	0.0482143	0.0232143	0.0506808	-12.8988
01_1_SRSF1_K562_ENCSR066VOO_repressed	K	AAA,AAG	0.0660813	0.0600775	0.0813953	0.066267	-0.280194	0.4795	0.4795	=	=			01_2_SRSF1_HepG2_ENCSR094KBY_repressed	K	AAA,AAG	0.0569092	0.0519481	0.0683983	0.0659412	-13.6971	0.0042	0.0084	-	-			01_3_SRSF1_GM19238_GSE52834_repressed	K	AAA,AAG	0.0555591	0.0506494	0.0714286	0.0637704	-12.8763	0.0722	0.120333	=	=			01_4_SRSF1_Hela_GSE26463_repressed	K	AAA,AAG	0.0428674	0.0410714	0.0535714	0.0656483	-34.7014
01_1_SRSF1_K562_ENCSR066VOO_repressed	L	TTA,TTG,CTT,CTC,CTA,CTG	0.102872	0.103876	0.1	0.101776	1.07686	0.3785	0.41635	=	=			01_2_SRSF1_HepG2_ENCSR094KBY_repressed	L	TTA,TTG,CTT,CTC,CTA,CTG	0.100265	0.100866	0.0961039	0.101952	-1.65491	0.3344	0.3671	=	=			01_3_SRSF1_GM19238_GSE52834_repressed	L	TTA,TTG,CTT,CTC,CTA,CTG	0.106771	0.0935065	0.102597	0.102645	4.02008	0.2524	0.33671	=	=			01_4_SRSF1_Hela_GSE26463_repressed	L	TTA,TTG,CTT,CTC,CTA,CTG	0.0868135	0.0785714	0.0910714	0.101924	-14.8252
01_1_SRSF1_K562_ENCSR066VOO_repressed	M	ATG	0.0231338	0.027907	0.0178295	0.0231038	0.129754	0.4878	0.4878	=	=			01_2_SRSF1_HepG2_ENCSR094KBY_repressed	M	ATG	0.0212286	0.025974	0.0186147	0.0230549	-7.92141	0.156	0.286	=	=			01_3_SRSF1_GM19238_GSE52834_repressed	M	ATG	0.020981	0.0246753	0.0168831	0.0226899	-7.53174	0.295	0.33671	=	=			01_4_SRSF1_Hela_GSE26463_repressed	M	ATG	0.0196571	0.0267857	0.0142857	0.0230359	-14.6673
01_1_SRSF1_K562_ENCSR066VOO_repressed	N	AAT,AAC	0.0402383	0.0372093	0.0430233	0.039588	1.6428	0.3752	0.41635	=	=			01_2_SRSF1_HepG2_ENCSR094KBY_repressed	N	AAT,AAC	0.0354521	0.0363636	0.0363636	0.0396365	-10.557	0.0358	0.07876	*	=			01_3_SRSF1_GM19238_GSE52834_repressed	N	AAT,AAC	0.0372877	0.0402597	0.0402597	0.039391	-5.33964	0.2996	0.33671	=	=			01_4_SRSF1_Hela_GSE26463_repressed	N	AAT,AAC	0.0323035	0.0267857	0.0285714	0.0396058	-18.4374
01_1_SRSF1_K562_ENCSR066VOO_repressed	P	CCT,CCC,CCA,CCG	0.0632378	0.0612403	0.0612403	0.0541636	16.7533	0.0031	0.00682	+	+			01_2_SRSF1_HepG2_ENCSR094KBY_repressed	P	CCT,CCC,CCA,CCG	0.0642662	0.0649351	0.0623377	0.0540353	18.9336	0.0018	0.0066	+	+			01_3_SRSF1_GM19238_GSE52834_repressed	P	CCT,CCC,CCA,CCG	0.0748906	0.0818182	0.0623377	0.0538426	39.0918	0.0005	0.0055	+	+			01_4_SRSF1_Hela_GSE26463_repressed	P	CCT,CCC,CCA,CCG	0.0772443	0.0732143	0.0732143	0.0540333	42.9569
01_1_SRSF1_K562_ENCSR066VOO_repressed	Q	CAA,CAG	0.0568733	0.0484496	0.072093	0.0480399	18.3875	0.0007	0.001925	+	+			01_2_SRSF1_HepG2_ENCSR094KBY_repressed	Q	CAA,CAG	0.0489067	0.0398268	0.0606061	0.0480565	1.76904	0.3671	0.3671	=	=			01_3_SRSF1_GM19238_GSE52834_repressed	Q	CAA,CAG	0.0503251	0.0337662	0.0623377	0.0481509	4.51535	0.3061	0.33671	=	=			01_4_SRSF1_Hela_GSE26463_repressed	Q	CAA,CAG	0.0619905	0.0517857	0.0642857	0.0480707	28.9569
01_1_SRSF1_K562_ENCSR066VOO_repressed	R	CGT,CGC,CGA,CGG,AGA,AGG	0.0464497	0.0465116	0.0476744	0.051197	-9.27263	0.0311	0.0570167	*	=			01_2_SRSF1_HepG2_ENCSR094KBY_repressed	R	CGT,CGC,CGA,CGG,AGA,AGG	0.0459637	0.0502165	0.0437229	0.0513315	-10.457	0.0244	0.0671	-	=			01_3_SRSF1_GM19238_GSE52834_repressed	R	CGT,CGC,CGA,CGG,AGA,AGG	0.0585221	0.0727273	0.0506494	0.0520246	12.4892	0.0945	0.24288	=	=			01_4_SRSF1_Hela_GSE26463_repressed	R	CGT,CGC,CGA,CGG,AGA,AGG	0.0465854	0.0339286	0.0571429	0.0513615	-9.29906
01_1_SRSF1_K562_ENCSR066VOO_repressed	S	TCT,TCC,TCA,TCG,AGT,AGC	0.0988047	0.096124	0.094186	0.0732599	34.8687	0	0	+	+			01_2_SRSF1_HepG2_ENCSR094KBY_repressed	S	TCT,TCC,TCA,TCG,AGT,AGC	0.109041	0.112121	0.102597	0.0732697	48.8218	0	0	+	+			01_3_SRSF1_GM19238_GSE52834_repressed	S	TCT,TCC,TCA,TCG,AGT,AGC	0.0884981	0.105195	0.0792208	0.0738751	19.7943	0.0093	0.0341	+	+			01_4_SRSF1_Hela_GSE26463_repressed	S	TCT,TCC,TCA,TCG,AGT,AGC	0.115534	0.135714	0.110714	0.0734927	57.2047
01_1_SRSF1_K562_ENCSR066VOO_repressed	T	ACT,ACC,ACA,ACG	0.0612321	0.0596899	0.0631783	0.0517443	18.3361	0.0001	0.00055	+	+			01_2_SRSF1_HepG2_ENCSR094KBY_repressed	T	ACT,ACC,ACA,ACG	0.0621724	0.0562771	0.0658009	0.0518361	19.9405	0.0002	0.0011	+	+			01_3_SRSF1_GM19238_GSE52834_repressed	T	ACT,ACC,ACA,ACG	0.0492395	0.0363636	0.0558442	0.0522455	-5.75361	0.254	0.33671	=	=			01_4_SRSF1_Hela_GSE26463_repressed	T	ACT,ACC,ACA,ACG	0.0615101	0.0571429	0.075	0.0519116	18.4901
01_1_SRSF1_K562_ENCSR066VOO_repressed	V	GTT,GTC,GTA,GTG	0.0599238	0.0662791	0.0468992	0.0617857	-3.01342	0.2439	0.335363	=	=			01_2_SRSF1_HepG2_ENCSR094KBY_repressed	V	GTT,GTC,GTA,GTG	0.063204	0.0666667	0.0593074	0.0619428	2.03611	0.3296	0.3671	=	=			01_3_SRSF1_GM19238_GSE52834_repressed	V	GTT,GTC,GTA,GTG	0.0747093	0.0753247	0.0636364	0.0624607	19.6102	0.0064	0.0341	+	+			01_4_SRSF1_Hela_GSE26463_repressed	V	GTT,GTC,GTA,GTG	0.0708782	0.0821429	0.0625	0.0620766	14.1786
01_1_SRSF1_K562_ENCSR066VOO_repressed	W	TGG	0.00827606	0.00813953	0.00813953	0.0122748	-32.5767	0.0003	0.0011	-	-			01_2_SRSF1_HepG2_ENCSR094KBY_repressed	W	TGG	0.011146	0.00995671	0.0125541	0.0122802	-9.23605	0.1893	0.297471	=	=			01_3_SRSF1_GM19238_GSE52834_repressed	W	TGG	0.00989963	0.012987	0.012987	0.0125279	-20.9796	0.1104	0.24288	=	=			01_4_SRSF1_Hela_GSE26463_repressed	W	TGG	0.0129749	0.0125	0.0142857	0.01236	4.97487
01_1_SRSF1_K562_ENCSR066VOO_repressed	Y	TAT,TAC	0.0256024	0.0232558	0.0286822	0.0288969	-11.4008	0.0403	0.0633286	*	=			01_2_SRSF1_HepG2_ENCSR094KBY_repressed	Y	TAT,TAC	0.0281381	0.0298701	0.0272727	0.028994	-2.95191	0.3413	0.3671	=	=			01_3_SRSF1_GM19238_GSE52834_repressed	Y	TAT,TAC	0.029098	0.0233766	0.0376623	0.0291064	-0.0288654	0.4938	0.4938	=	=			01_4_SRSF1_Hela_GSE26463_repressed	Y	TAT,TAC	0.0245009	0.0178571	0.0285714	0.0289409	-15.3414
[truncated: 208 more columns]

## Sheet: Physicochemical Properties
Project	feature	frequencies_of_the_interest_set	average_frequencies_of_the_10000_sets	relative_freq	p_values_like	FDR	regulation_(p<=0,05)	regulation(fdr<=0,05)			Project	feature	frequencies_of_the_interest_set	average_frequencies_of_the_10000_sets	relative_freq	p_values_like	FDR	regulation_(p<=0,05)	regulation(fdr<=0,05)			Project	feature	frequencies_of_the_interest_set	average_frequencies_of_the_10000_sets	relative_freq	p_values_like	FDR	regulation_(p<=0,05)	regulation(fdr<=0,05)			Project	feature	frequencies_of_the_interest_set	average_frequencies_of_the_10000_sets	relative_freq	p_values_like	FDR	regulation_(p<=0,05)	regulation(fdr<=0,05)			Project	feature	frequencies_of_the_interest_set	average_frequencies_of_the_10000_sets	relative_freq	p_values_like
01_1_SRSF1_ENCSR066VOO_K562_activated	Very-small	0.244786	0.221445	10.5403	0	0	+	+			01_2_SRSF1_ENCSR094KBY_HepG2_activated	Very-small	0.235171	0.221564	6.14162	0	0	+	+			01_3_SRSF1_GSE52834_GM19238_activated	Very-small	0.234985	0.222346	5.6845	0.0471	0.122283	*	=			01_4_SRSF1_GSE26463_HeLA_activated	Very-small	0.258307	0.221046	16.8569	0	0	+	+			1_Union_SRSF1_activated	Very-small	0.24099	0.221599	8.75041	0
01_1_SRSF1_ENCSR066VOO_K562_activated	Small	0.43973	0.41795	5.21133	0	0	+	+			01_2_SRSF1_ENCSR094KBY_HepG2_activated	Small	0.427302	0.418221	2.17138	0.0216	0.04752	+	+			01_3_SRSF1_GSE52834_GM19238_activated	Small	0.433324	0.419342	3.33423	0.0667	0.122283	=	=			01_4_SRSF1_GSE26463_HeLA_activated	Small	0.448112	0.417585	7.31037	0.0002	0.00044	+	+			1_Union_SRSF1_activated	Small	0.434707	0.418216	3.94315	0
01_1_SRSF1_ENCSR066VOO_K562_activated	Large	0.35138	0.371896	-5.51669	0	0	-	-			01_2_SRSF1_ENCSR094KBY_HepG2_activated	Large	0.361548	0.37166	-2.72059	0.0057	0.015675	-	-			01_3_SRSF1_GSE52834_GM19238_activated	Large	0.354507	0.370736	-4.37769	0.0263	0.0964333	*	=			01_4_SRSF1_GSE26463_HeLA_activated	Large	0.336829	0.372358	-9.54152	0	0	-	-			1_Union_SRSF1_activated	Large	0.355049	0.371666	-4.47079	0
01_1_SRSF1_ENCSR066VOO_K562_activated	Polar-uncharged	0.241085	0.243609	-1.03611	0.2062	0.22682	=	=			01_2_SRSF1_ENCSR094KBY_HepG2_activated	Polar-uncharged	0.241848	0.243492	-0.675027	0.3161	0.34771	=	=			01_3_SRSF1_GSE52834_GM19238_activated	Polar-uncharged	0.252525	0.243706	3.61849	0.1034	0.142175	=	=			01_4_SRSF1_GSE26463_HeLA_activated	Polar-uncharged	0.244345	0.243211	0.466029	0.4219	0.4219	=	=			1_Union_SRSF1_activated	Polar-uncharged	0.241109	0.243616	-1.02896	0.1378
01_1_SRSF1_ENCSR066VOO_K562_activated	Charged	0.240151	0.239611	0.225276	0.4421	0.4421	=	=			01_2_SRSF1_ENCSR094KBY_HepG2_activated	Charged	0.237716	0.239957	-0.933889	0.2909	0.34771	=	=			01_3_SRSF1_GSE52834_GM19238_activated	Charged	0.243139	0.239912	1.34496	0.3475	0.38225	=	=			01_4_SRSF1_GSE26463_HeLA_activated	Charged	0.248649	0.24021	3.51297	0.1172	0.184171	=	=			1_Union_SRSF1_activated	Charged	0.239425	0.239716	-0.121593	0.4581
01_1_SRSF1_ENCSR066VOO_K562_activated	Hydrophilic	0.321844	0.327349	-1.68173	0.0887	0.108411	=	=			01_2_SRSF1_ENCSR094KBY_HepG2_activated	Hydrophilic	0.321848	0.327662	-1.77446	0.0947	0.173617	=	=			01_3_SRSF1_GSE52834_GM19238_activated	Hydrophilic	0.329865	0.327466	0.732525	0.4015	0.4015	=	=			01_4_SRSF1_GSE26463_HeLA_activated	Hydrophilic	0.333118	0.327924	1.58385	0.2495	0.304944	=	=			1_Union_SRSF1_activated	Hydrophilic	0.321584	0.327436	-1.78733	0.0289
01_1_SRSF1_ENCSR066VOO_K562_activated	Hydrophobic	0.347841	0.365261	-4.7691	0	0	-	-			01_2_SRSF1_ENCSR094KBY_HepG2_activated	Hydrophobic	0.347519	0.364642	-4.69608	0	0	-	-			01_3_SRSF1_GSE52834_GM19238_activated	Hydrophobic	0.336625	0.363778	-7.46421	0.0002	0.0022	-	-			01_4_SRSF1_GSE26463_HeLA_activated	Hydrophobic	0.325452	0.365041	-10.8451	0	0	-	-			1_Union_SRSF1_activated	Hydrophobic	0.349097	0.364871	-4.3234	0
01_1_SRSF1_ENCSR066VOO_K562_activated	Neutral	0.316578	0.294784	7.39325	0	0	+	+			01_2_SRSF1_ENCSR094KBY_HepG2_activated	Neutral	0.316598	0.295109	7.28151	0	0	+	+			01_3_SRSF1_GSE52834_GM19238_activated	Neutral	0.32111	0.296226	8.4003	0.0036	0.0198	+	+			01_4_SRSF1_GSE26463_HeLA_activated	Neutral	0.330686	0.294475	12.2967	0	0	+	+			1_Union_SRSF1_activated	Neutral	0.315754	0.295105	6.99709	0
01_1_SRSF1_ENCSR066VOO_K562_activated	hydroxyl	0.159392	0.155872	2.2588	0.0834	0.108411	=	=			01_2_SRSF1_ENCSR094KBY_HepG2_activated	hydroxyl	0.157717	0.155787	1.23865	0.2518	0.346225	=	=			01_3_SRSF1_GSE52834_GM19238_activated	hydroxyl	0.165799	0.156152	6.17758	0.0573	0.122283	=	=			01_4_SRSF1_GSE26463_HeLA_activated	hydroxyl	0.159875	0.155497	2.81556	0.1922	0.264275	=	=			1_Union_SRSF1_activated	hydroxyl	0.15895	0.155896	1.95912	0.0608
01_1_SRSF1_ENCSR066VOO_K562_activated	Negatively-charged	0.130912	0.124591	5.07324	0.0058	0.0106333	+	+			01_2_SRSF1_ENCSR094KBY_HepG2_activated	Negatively-charged	0.125741	0.124758	0.78764	0.3593	0.3593	=	=			01_3_SRSF1_GSE52834_GM19238_activated	Negatively-charged	0.132474	0.124647	6.27864	0.0897	0.140957	=	=			01_4_SRSF1_GSE26463_HeLA_activated	Negatively-charged	0.135305	0.124785	8.43037	0.0178	0.0326333	+	+			1_Union_SRSF1_activated	Negatively-charged	0.128972	0.124625	3.48773	0.0137
01_1_SRSF1_ENCSR066VOO_K562_activated	Positively-charged	0.109239	0.11502	-5.02609	0.008	0.0125714	-	-			01_2_SRSF1_ENCSR094KBY_HepG2_activated	Positively-charged	0.111976	0.115199	-2.79827	0.1125	0.176786	=	=			01_3_SRSF1_GSE52834_GM19238_activated	Positively-charged	0.110665	0.115265	-3.99031	0.2056	0.251289	=	=			01_4_SRSF1_GSE26463_HeLA_activated	Positively-charged	0.113344	0.115425	-1.80319	0.3262	0.35882	=	=			1_Union_SRSF1_activated	Positively-charged	0.110453	0.115091	-4.0299	0.0043
Project	feature	frequencies_of_the_interest_set	average_frequencies_of_the_10000_sets	relative_freq	p_values_like	FDR	regulation_(p<=0,05)	regulation(fdr<=0,05)			Project	feature	frequencies_of_the_interest_set	average_frequencies_of_the_10000_sets	relative_freq	p_values_like	FDR	regulation_(p<=0,05)	regulation(fdr<=0,05)			Project	feature	frequencies_of_the_interest_set	average_frequencies_of_the_10000_sets	relative_freq	p_values_like	FDR	regulation_(p<=0,05)	regulation(fdr<=0,05)			Project	feature	frequencies_of_the_interest_set	average_frequencies_of_the_10000_sets	relative_freq	p_values_like	FDR	regulation_(p<=0,05)	regulation(fdr<=0,05)			Project	feature	frequencies_of_the_interest_set	average_frequencies_of_the_10000_sets	relative_freq	p_values_like
01_1_SRSF1_ENCSR066VOO_K562_repressed	Very-small	0.221774	0.219514	1.02986	0.3404	0.3404	=	=			01_2_SRSF1_ENCSR094KBY_HepG2_repressed	Very-small	0.248184	0.219477	13.0795	0	0	+	+			01_3_SRSF1_GSE52834_GM19238_repressed	Very-small	0.220919	0.220959	-0.0182219	0.499	0.499	=	=			01_4_SRSF1_GSE26463_HeLA_repressed	Very-small	0.253697	0.219654	15.4983	0.0019	0.00209	+	+			1_Union_SRSF1_repressed	Very-small	0.236722	0.219744	7.7262	0
01_1_SRSF1_ENCSR066VOO_K562_repressed	Small	0.426699	0.416683	2.40373	0.0695	0.0849444	=	=			01_2_SRSF1_ENCSR094KBY_HepG2_repressed	Small	0.449509	0.416421	7.94574	0	0	+	+			01_3_SRSF1_GSE52834_GM19238_repressed	Small	0.425319	0.417659	1.83396	0.2619	0.360113	=	=			01_4_SRSF1_GSE26463_HeLA_repressed	Small	0.466392	0.416563	11.962	0.0006	0.000825	+	+			1_Union_SRSF1_repressed	Small	0.437535	0.416642	5.01454	0.0001
01_1_SRSF1_ENCSR066VOO_K562_repressed	Large	0.360113	0.373869	-3.67939	0.0148	0.0232571	-	-			01_2_SRSF1_ENCSR094KBY_HepG2_repressed	Large	0.348341	0.373915	-6.83953	0	0	-	-			01_3_SRSF1_GSE52834_GM19238_repressed	Large	0.358427	0.37256	-3.7935	0.0986	0.154943	=	=			01_4_SRSF1_GSE26463_HeLA_repressed	Large	0.314349	0.373848	-15.9153	0	0	-	-			1_Union_SRSF1_repressed	Large	0.3577	0.373805	-4.30848	0.0002
01_1_SRSF1_ENCSR066VOO_K562_repressed	Polar-uncharged	0.284654	0.241564	17.838	0	0	+	+			01_2_SRSF1_ENCSR094KBY_HepG2_repressed	Polar-uncharged	0.285313	0.241834	17.9786	0	0	+	+			01_3_SRSF1_GSE52834_GM19238_repressed	Polar-uncharged	0.255506	0.242898	5.19088	0.0836	0.153267	=	=			01_4_SRSF1_GSE26463_HeLA_repressed	Polar-uncharged	0.297779	0.241818	23.1415	0	0	+	+			1_Union_SRSF1_repressed	Polar-uncharged	0.278683	0.241901	15.2058	0
01_1_SRSF1_ENCSR066VOO_K562_repressed	Charged	0.217626	0.243822	-10.7439	0	0	-	-			01_2_SRSF1_ENCSR094KBY_HepG2_repressed	Charged	0.203477	0.243425	-16.4108	0	0	-	-			01_3_SRSF1_GSE52834_GM19238_repressed	Charged	0.221937	0.240964	-7.89625	0.0399	0.13574	*	=			01_4_SRSF1_GSE26463_HeLA_repressed	Charged	0.184767	0.243076	-23.9879	0	0	-	-			1_Union_SRSF1_repressed	Charged	0.211879	0.243068	-12.8316	0
01_1_SRSF1_ENCSR066VOO_K562_repressed	Hydrophilic	0.31538	0.331475	-4.85555	0.0071	0.0130167	-	-			01_2_SRSF1_ENCSR094KBY_HepG2_repressed	Hydrophilic	0.288307	0.331143	-12.936	0	0	-	-			01_3_SRSF1_GSE52834_GM19238_repressed	Hydrophilic	0.309926	0.328671	-5.70348	0.0617	0.13574	=	=			01_4_SRSF1_GSE26463_HeLA_repressed	Hydrophilic	0.279662	0.330627	-15.4147	0.0001	0.000157143	-	-			1_Union_SRSF1_repressed	Hydrophilic	0.301614	0.330751	-8.8091	0
01_1_SRSF1_ENCSR066VOO_K562_repressed	Hydrophobic	0.349982	0.362069	-3.33833	0.0231	0.0317625	-	-			01_2_SRSF1_ENCSR094KBY_HepG2_repressed	Hydrophobic	0.35421	0.362662	-2.33072	0.0916	0.0916	=	=			01_3_SRSF1_GSE52834_GM19238_repressed	Hydrophobic	0.364787	0.3642	0.16103	0.4721	0.499	=	=			01_4_SRSF1_GSE26463_HeLA_repressed	Hydrophobic	0.345342	0.363033	-4.87305	0.0842	0.0842	=	=			1_Union_SRSF1_repressed	Hydrophobic	0.356294	0.362844	-1.80541	0.0739
01_1_SRSF1_ENCSR066VOO_K562_repressed	Neutral	0.326298	0.294207	10.9076	0	0	+	+			01_2_SRSF1_ENCSR094KBY_HepG2_repressed	Neutral	0.346263	0.29387	17.8286	0	0	+	+			01_3_SRSF1_GSE52834_GM19238_repressed	Neutral	0.315331	0.294634	7.0248	0.0403	0.13574	*	=			01_4_SRSF1_GSE26463_HeLA_repressed	Neutral	0.36194	0.293988	23.1137	0	0	+	+			1_Union_SRSF1_repressed	Neutral	0.331181	0.294061	12.6233	0
01_1_SRSF1_ENCSR066VOO_K562_repressed	hydroxyl	0.1869	0.153911	21.4338	0	0	+	+			01_2_SRSF1_ENCSR094KBY_HepG2_repressed	hydroxyl	0.200483	0.154116	30.0857	0	0	+	+			01_3_SRSF1_GSE52834_GM19238_repressed	hydroxyl	0.167517	0.15519	7.94323	0.0615	0.13574	=	=			01_4_SRSF1_GSE26463_HeLA_repressed	hydroxyl	0.202884	0.154267	31.5148	0	0	+	+			1_Union_SRSF1_repressed	hydroxyl	0.188948	0.154218	22.5197	0
01_1_SRSF1_ENCSR066VOO_K562_repressed	Negatively-charged	0.104354	0.126346	-17.406	0	0	-	-			01_2_SRSF1_ENCSR094KBY_HepG2_repressed	Negatively-charged	0.0999977	0.126246	-20.7915	0	0	-	-			01_3_SRSF1_GSE52834_GM19238_repressed	Negatively-charged	0.107363	0.125069	-14.1569	0.0077	0.0847	-	=			01_4_SRSF1_GSE26463_HeLA_repressed	Negatively-charged	0.0947162	0.12608	-24.8759	0.0001	0.000157143	-	-			1_Union_SRSF1_repressed	Negatively-charged	0.102845	0.126005	-18.3805	0
01_1_SRSF1_ENCSR066VOO_K562_repressed	Positively-charged	0.113272	0.117476	-3.57881	0.1504	0.16544	=	=			01_2_SRSF1_ENCSR094KBY_HepG2_repressed	Positively-charged	0.103479	0.117179	-11.6912	0.0005	0.00055	-	-			01_3_SRSF1_GSE52834_GM19238_repressed	Positively-charged	0.114574	0.115895	-1.14005	0.4357	0.499	=	=			01_4_SRSF1_GSE26463_HeLA_repressed	Positively-charged	0.0900509	0.116996	-23.031	0.001	0.00122222	-	-			1_Union_SRSF1_repressed	Positively-charged	0.109034	0.117063	-6.8589	0.0037
Union=All the exons regulated by a splicing factor accross different cell lines
[truncated: 201 more columns]
